# Supplementary material for: Identification of Sucrose Non-Fermenting–Related Kinase (SNRK) as a Suppressor of Adipocyte Inflammation
Source: Oxford University Press journal article supplement (doi:10.2337/db12-1081), 2013-03-22
Supplement: db121081supplementarydata2.xls [file db121081supplementarydata2.xls]

## Sheet: Sheet1
counter	timecourse manual naming::protein name manual	all protein name index	assigned sequence	phosphosite annotated	accession number for psite	heatmap peakarea Final for display labelfree 1	peakarea manual 1	peakarea manual 1 rep1 thresholded	peakarea manual 1 rep2 thresholded	peakarea manual 1 rep3 thresholded	peakarea manual 1 rep4 thresholded	peakarea manual 2	peakarea manual 2 rep1 thresholded	peakarea manual 2 rep2 thresholded	peakarea manual 2 rep3 thresholded	peakarea manual 2 rep4 thresholded	shSNRK/shGFP	qvalues for SILAC	isolated mass timepoints	mass error timepoints	xcorr timepoints	ascorr timepoints	spectral score timepoints	charge state timepoints	delta cn timepoints	drosophila CG accession number	gi species adjust	gi name species adjust	IPI accession number	swissprot accession	hprd accession	string accession	mass error minimum across timepoints	reversed databse direction	xcorr max across timepoints	Go location unique index	Go bio process unqiue index	Go mol process unique index	Kegg unique index
1959017	Vinculin	Manual Assigned Name:Vinculin SwissPROT>VINC_MOUSE>Vinculin OS=Mus musculus GN=Vcl IPI>Q64727>Vinculin IPI>IPI00405227.3>Vcl Vinculin NCBI>50403784>Vinculin (Metavinculin) [MASS=116717] NCBI>14250200>vinculin [Mus musculus] NCBI>309533>vinculin [Mus musculus] NCBI>148669535>vinculin, isoform CRA_b [Mus musculus] [MASS=123858] NCBI>148669534>vinculin, isoform CRA_a [Mus musculus] [MASS=116717] NCB…	R.DPNAS*PGDAGEQAIR.Q	S290*	UNI:Q64727	18339.3	18339.3	24208	21669	8232	19248	5.29028e+07	22125661	69670402	71534833	48280457	0.00034666	0.0094881	794.337	0.30359	50.23	100	0.839308	2	0		50403784	Vinculin (Metavinculin) [MASS=116717]	Q64727	VINC_MOUSE		372509	0.30359	F	50.23	membrane	cell adhesion	protein binding	Regulation of actin cytoskeleton Focal adhesion Leukocyte transendothelial migration Adherens junction
1959847	Serologically defined colon cancer antigen 8 homolog	Manual Assigned Name:Serologically defined colon cancer antigen 8 homolog SwissPROT>SDCG8_MOUSE>T430S438>Serologically defined colon cancer antigen 8 homolog OS=Mus musculus GN=Sdccag8 IPI>Q80UF4>T430S438>Serologically defined colon cancer antigen 8 homolog IPI>IPI00283842.3>T430S438>Sdccag8 Serologically defined colon cancer antigen 8 homolog NCBI>81865757>T430S438>Serologically defined colon ca…	K.VT*REKTAAVS*HLEEIQNHVASQEMDVTK.V	T430S438	UNI:Q80UF4	160558	160558		136514	240497	104665	1.20217e+08	43091732	289175845	89837324	58763961	0.00133557	0.0230352	1118.19	0.333776	20.91	9.78293	0.163442	3	0		81865757	Serologically defined colon cancer antigen 8 homolog (Centrosomal colon cancer autoantigen protein) (mCCCAP)	Q80UF4	SDCG8_MOUSE		374312	0.333776	F	20.91	centrosome	Ras protein signal transduction	protein binding
1960283	Myosin, light polypeptide kinase	Manual Assigned Name:Myosin, light polypeptide kinase SwissPROT>B1B1A8_MOUSE>S611>"Myosin, light polypeptide kinase OS=Mus musculus GN=Mylk" IPI>B1B1A8>S611>Myosin, light polypeptide kinase IPI>Q6PDN3>S611>Myosin light chain kinase, smooth muscle IPI>IPI00125493.5>S611>Mylk myosin light chain kinase, smooth muscle NCBI>94717658>S602>Myosin light chain kinase, smooth muscle (MLCK) (Telokin) (Kinas…	R.EHRLS*PAR.S	S611	UNI:B1B1A8	20652.6	20652.6	27390	47944	1901	5376	1.53723e+06	1734397	1641439	1169284	1603785	0.013435	0.0226272	355.842	0.956348	24.45	100	0.829044	3	0		94717658	Myosin light chain kinase, smooth muscle (MLCK) (Telokin) (Kinase-related protein) (KRP) [MASS=212924]	B1B1A8	B1B1A8_MOUSE		372961	0.956348	F	24.45	cytoplasm intracellular	protein amino acid phosphorylation	ATP binding	Calcium signaling pathway Regulation of actin cytoskeleton Vascular smooth muscle contraction Focal adhesion
1960202	Uncharacterized protein (Fragment)	Manual Assigned Name:Uncharacterized protein (Fragment) IPI>Q3UGF0>Uncharacterized protein (Fragment) NCBI>74190979>unnamed protein product [Mus musculus] [MASS=69442]	-.PS*PPSLSPR.L	S2	UNI:Q3UGF0	334173	334173	241624	262889	419228	412951	2.997e+06	1725486	3415435	3926110	2920981	0.111502	0.010407	514.245	1.50075	25.91		0.170265	2	0		74190979	unnamed protein product [Mus musculus] [MASS=69442]	Q3UGF0	Q3UGF0_MOUSE			1.50075	F	25.91
1959753	Sperm specific antigen 2	Manual Assigned Name:Sperm specific antigen 2 SwissPROT>A2AQD4_MOUSE>S90>Sperm specific antigen 2 OS=Mus musculus GN=Ssfa2 SwissPROT>A2AQD5_MOUSE>S90>Sperm specific antigen 2 OS=Mus musculus GN=Ssfa2 SwissPROT>A2AQD6_MOUSE>S90>Sperm specific antigen 2 OS=Mus musculus GN=Ssfa2 IPI>A2AQD5>S90>Sperm specific antigen 2 IPI>A2AQD6>S90>Sperm specific antigen 2 IPI>Q922B9>S90>Sperm-specific antigen 2 ho…	R.TPLGAS*LDEQSSGTPK.G	S90	UNI:A2AQD5	5.64687e+06	5.64687e+06	3757016	8637979	8265986	1926487	5.049e+07	31508585	56217663	65597521	48636359	0.111841	0.022144	838.387	0.112187	63.8	70.7945	0.886232	2	0		341942107	RecName: Full=Sperm-specific antigen 2 homolog; AltName: Full=Ki-ras-induced actin-interacting protein	A2AQD5	A2AQD6_MOUSE		374553	0.112187	F	63.8	cytoplasm	oxidation reduction	oxidoreductase activity
1959761	Snrnp70 protein	Manual Assigned Name:Snrnp70 protein IPI>Q99LY5>S81>Snrnp70 protein IPI>Q62376>S81>U1 small nuclear ribonucleoprotein 70 kDa IPI>IPI00625105.2>S81>Snrnp70 Isoform 1 of U1 small nuclear ribonucleoprotein 70 kDa NCBI>83305641>S408>U1 small nuclear ribonucleoprotein 70 kDa (U1 SNRNP 70 kDa) (snRNP70) NCBI>148690901>S408>U1 small nuclear ribonucleoprotein polypeptide A, isoform CRA_a [Mus musculus] […	R.GGGGS*GQDNGLEGLGSDGR.D	S81	UNI:Q99LY5	620716	620716	908251	387562	898546	288504	5.41167e+06	2307598	7322073	8562036	3454985	0.114699	0.026299	890.362	0.456253	23.48	52.3094	0.0365694	2	0		83305641	U1 small nuclear ribonucleoprotein 70 kDa (U1 SNRNP 70 kDa) (snRNP70)	Q99LY5	Q99LY5_MOUSE			0.456253	F	23.48	nucleus	nuclear mRNA splicing, via spliceosome regulation of RNA splicing	protein binding	Spliceosome
1959338	SAM and SH3 domain-containing protein 1	Manual Assigned Name:SAM and SH3 domain-containing protein 1 HPRD>06408_1>S813>SASH1 SwissPROT>SASH1_MOUSE>S805>SAM and SH3 domain-containing protein 1 OS=Mus musculus GN=Sash1 IPI>P59808>S805>SAM and SH3 domain-containing protein 1 IPI>IPI00338954.3>S805>Sash1 SAM and SH3 domain-containing protein 1 IPI>F8VQK5>S805>Uncharacterized protein NCBI>34098397>S805>SAM and SH3 domains containing protein…	R.S*LPVSICR.S	S805	UNI:P59808	1.05159e+07	1.05159e+07	8889244	16486756	12203937	4483641	8.40704e+07	66182044	156303135	71237233	42559038	0.125084	0.0094881	506.239	1.51067	33.37	31.0914	0.885816	2	0		34098397	SAM and SH3 domains containing protein 1	P59808	SASH1_MOUSE	06408_1	371036	1.51067	F	33.37	centrosome	cell cycle	protein binding
1960221	Ppfia1 protein	Manual Assigned Name:Ppfia1 protein SwissPROT>B2RXW8_MOUSE>T770>Ppfia1 protein OS=Mus musculus GN=Ppfia1 SwissPROT>B8QI33_MOUSE>T795>Liprin-alpha 1 OS=Mus musculus GN=Ppfia1 IPI>B2RXW8>T770>Ppfia1 protein IPI>B8QI33>T770>Liprin-alpha 1 IPI>IPI00896602.2>T770>- Liprin-alpha 1 IPI>IPI00896607.1>T770>Ppfia1 Ppfia1 protein IPI>IPI00896602.1>T770>- Putative uncharacterized protein NCBI>187957400>T770>…	K.GAPHT*VSHEDIR.D	T770	UNI:B2RXW8	476479	476479	874088	467435	231424	332968	3.063e+06	2509836	3092226	3964619	2685306	0.15556	0.0246184	466.877	0.423991	23.71	7.87106	0.408155	3	0		187957400	Ppfia1 protein [Mus musculus] [MASS=140134]	B2RXW8	B8QI33_MOUSE		380301	0.423991	F	23.71	Golgi cisterna membrane nucleus	transmembrane transport regulation of transcription, DNA-dependent	protein binding
1960061	Histone deacetylase	Manual Assigned Name:Histone deacetylase SwissPROT>D3YYI8_MOUSE>S393>MCG128529 OS=Mus musculus GN=Gm10093 SwissPROT>HDAC1_MOUSE>S393>Histone deacetylase 1 OS=Mus musculus GN=Hdac1 IPI>D3YYI8>S393>Histone deacetylase IPI>O09106>S393>Histone deacetylase 1 IPI>IPI00114232.1>S393>Hdac1 Histone deacetylase 1 IPI>IPI00556893.3>S393>Gm10093 Uncharacterized protein IPI>IPI00850738.1>S393>LOC100046039 sim…	R.MLPHAPGVQMQAIPEDAIPEES*GDEDEEDPDKR.I	S393*	UNI:D3YYI8	7.76911e+06	7.76911e+06	4805151	9797309	7286085	9187884	4.33354e+07	16470509	64833267	22959773	69077968	0.179279	0.0230352	932.155	0.24694	23.06	100	0.873408	4	0		2498444	Histone deacetylase 1 (HD1)	D3YYI8	HDAC1_MOUSE		388438	0.24694	F	23.06	nucleus	regulation of transcription	protein binding	Pathways in cancer Huntington's disease Chronic myeloid leukemia Cell cycle Notch signaling pathway
1960329	Treacle protein	Manual Assigned Name:Treacle protein SwissPROT>Q7TPZ2_MOUSE>S1227>Tcof1 protein (Fragment) OS=Mus musculus GN=Tcof1 SwissPROT>TCOF_MOUSE>S1191>Treacle protein OS=Mus musculus GN=Tcof1 IPI>O08784>S1191>Treacle protein IPI>IPI00115660.1>S1191>Tcof1 Treacle protein IPI>IPI00808555.2>S1191>Tcof1 Tcof1 protein IPI>IPI00408190.1>S1191>Tcof1 Tcof1 protein (Fragment) IPI>E9PYV2>S1191>Uncharacterized prot…	R.KLS*GDLEAGAPK.N	S1191*	UNI:O08784	1.26909e+06	1.26909e+06	1732753	1352984	1054076	936528	5.48372e+06	6987942	5897247	4691426	4358251	0.231428	0.00588589	641.324	1.48404	30.35	100	0.131339	2	0		41688745	Treacle protein (Treacher Collins syndrome protein homolog)	O08784	TCOF_MOUSE		388032	1.48404	F	30.35	nucleus	transport transcription of nuclear rRNA large RNA polymerase I transcript	cobalt ion binding zinc ion binding
1959304	Regulatory-associated protein of mTOR	Manual Assigned Name:Regulatory-associated protein of mTOR SwissPROT>A2ACM0_MOUSE>S863>Novel protein containing six WD40 domains at C-terminus OS=Mus musculus GN=Rptor IPI>Q8K4Q0>S863>Regulatory-associated protein of mTOR IPI>A2ACM0>S863>Novel protein containing six WD40 domains at C-terminus IPI>IPI00411051.4>S863>Rptor regulatory-associated protein of mTOR IPI>IPI00170249.1>S863>Rptor Isoform 1…	R.ILDTSSLTQSAPAS*PTNK.G	S863	UNI:Q8K4Q0	9.14375e+06	9.14375e+06	2379156	13053945	12868848	8273041	3.62247e+07	33713100	45984048	44584763	20616818	0.252418	0.0312601	637.642	0.554186	22.02	16.8385	0.671119	3	0		46577497	Regulatory associated protein of mTOR (Raptor) (P150 target of rapamycin (TOR)-scaffold protein)	Q8K4Q0	A2ACM0_MOUSE		373935	0.554186	F	22.02	TORC1 complex	regulation of cell size	protein binding	Insulin signaling pathway mTOR signaling pathway
1959669	Programmed cell death protein 4	Manual Assigned Name:Programmed cell death protein 4 SwissPROT>PDCD4_MOUSE>T93>Programmed cell death protein 4 OS=Mus musculus GN=Pdcd4 IPI>Q61823>T93>Programmed cell death protein 4 IPI>IPI00323064.3>T93>Pdcd4 Programmed cell death protein 4 NCBI>81883938>T93>Programmed cell death protein 4 (Topoisomerase-inhibitor suppressed protein) (Protein MA-3) NCBI>95104802>T93>Pdcd4 [Mus musculus] [MASS=5…	R.SGVAVPT*SPK.G	T93*	UNI:Q61823	4.41838e+06	4.41838e+06	3851766	5460507	5478363	2882880	1.72088e+07	12369849	21955441	20136684	14373104	0.256752	0.010407	515.757	0.133915	22.82	93.048	0.279916	2	0		81883938	Programmed cell death protein 4 (Topoisomerase-inhibitor suppressed protein) (Protein MA-3)	Q61823	PDCD4_MOUSE		373669	0.133915	F	22.82	nucleus	apoptosis cell aging	protein binding
1959926	Programmed cell death protein 4	Manual Assigned Name:Programmed cell death protein 4 SwissPROT>PDCD4_MOUSE>S94>Programmed cell death protein 4 OS=Mus musculus GN=Pdcd4 IPI>Q61823>S94>Programmed cell death protein 4 IPI>IPI00323064.3>S94>Pdcd4 Programmed cell death protein 4 NCBI>81883938>S94>Programmed cell death protein 4 (Topoisomerase-inhibitor suppressed protein) (Protein MA-3) NCBI>95104802>S94>Pdcd4 [Mus musculus] [MASS=5…	R.SGVAVPTS*PK.G	S94*	UNI:Q61823	4.41838e+06	4.41838e+06	3851766	5460507	5478363	2882880	1.72088e+07	12369849	21955441	20136684	14373104	0.256752	0.010407	515.757	0.492961	31.96	21.214	0.529476	2	0		81883938	Programmed cell death protein 4 (Topoisomerase-inhibitor suppressed protein) (Protein MA-3)	Q61823	PDCD4_MOUSE		373669	0.492961	F	31.96	nucleus	apoptosis cell aging	protein binding
1960269	Insulin receptor substrate 1	Manual Assigned Name:Insulin receptor substrate 1 SwissPROT>IRS1_MOUSE>S1097>Insulin receptor substrate 1 OS=Mus musculus GN=Irs1 SwissPROT>Q543V3_MOUSE>S1095>Insulin receptor substrate 1 OS=Mus musculus GN=Irs1 IPI>P35569>S1097>Insulin receptor substrate 1 IPI>Q543V3>S1097>Insulin receptor substrate 1 IPI>IPI00119627.1>S1097>Irs1 Insulin receptor substrate 1 IPI>IPI00605223.1>S1097>Irs1 insulin …	R.HSS*ETFSAPTR.A	S1097*	UNI:P35569	445440	445440	725072	280341	428212	348136	1.51173e+06	1623420	1918350	1852490	652666	0.294656	0.0304271	650.272	0.213922	46.08	13.3356	0.962306	2	0		547739	INSULIN RECEPTOR SUBSTRATE-1	P35569	Q543V3_MOUSE		384184	0.213922	F	46.08	nucleus	signal transduction response to peptide hormone stimulus	protein binding	Aldosterone-regulated sodium reabsorption Insulin signaling pathway Type II diabetes mellitus Neurotrophin signaling pathway Adipocytokine signaling pathway
1958881	Eef1d protein	Manual Assigned Name:Eef1d protein HPRD>00560_1>S499>Eukaryotic translation elongation factor 1, delta HPRD>00560_2>S133>Eukaryotic translation elongation factor 1, delta SwissPROT>D3YUQ9_MOUSE>S133>Uncharacterized protein OS=Mus musculus GN=Eef1d SwissPROT>D3YZT9_MOUSE>S152>Uncharacterized protein OS=Mus musculus GN=Eef1d SwissPROT>D3Z7N2_MOUSE>S109>Uncharacterized protein OS=Mus musculus GN=Eef…	R.ATAPQTQHVS*PMR.Q	S128*	UNI:Q91VK2	615444	615444	749760	750019	656143	305855	1.61488e+06	1468573	1889856	2007571	1093527	0.381108	0.022144	757.346	0.44395	37.64	47.7991	0.893171	2	0		13124192	Elongation factor 1-delta (EF-1-delta)	Q91VK2	Q91VK2_MOUSE	00560_2	386762	0.27879	F	37.64	eukaryotic translation elongation factor 1 complex	translation	protein binding translation elongation factor activity
1959816	Splicing factor 1	Manual Assigned Name:Splicing factor 1 HPRD>03306_1>S80S82>Splicing factor 1 HPRD>03306_2>S80S82>Splicing factor 1 HPRD>03306_4>S80S82>Splicing factor 1 SwissPROT>D3YVH4_MOUSE>S54S56>Uncharacterized protein OS=Mus musculus GN=Sf1 SwissPROT>D3YZC9_MOUSE>S80S82>Uncharacterized protein OS=Mus musculus GN=Sf1 SwissPROT>Q3TZI3_MOUSE>S80S82>Putative uncharacterized protein OS=Mus musculus GN=Sf1 SwissP…	R.TGDLGIPPNPEDRS*PS*PEPIYNSEGK.R	S80S82*	UNI:Q64213	2.72538e+07	2.72538e+07	12474110	50288074	30771452	15481546	7.04896e+07	67500367	107816063	78279280	28362725	0.386636	0.0293002	982.098	1.04881	21.21	35.1306	0.692096	3	0		341942283	RecName: Full=Splicing factor 1; AltName: Full=CW17; AltName: Full=Mammalian branch point-binding protein; Short=BBP; Short=mBBP; AltName: Full=Transcription factor ZFM1; Short=mZFM; AltName: Full=Zinc finger gene in MEN1 locus; AltName: Full=Zinc finger protein 162	Q64213	SF01_MOUSE	03306_4	387518	1.04881	F	21.21	nucleus clathrin coat mitochondrion	regulation of transcription male sex determination	protein binding zinc ion binding
1959768	Plasmalemma vesicle associated protein	Manual Assigned Name:Plasmalemma vesicle associated protein SwissPROT>B8JK32_MOUSE>S527>Heterogeneous nuclear ribonucleoprotein M OS=Mus musculus GN=Hnrnpm SwissPROT>B8JK33_MOUSE>S488>Heterogeneous nuclear ribonucleoprotein M OS=Mus musculus GN=Hnrnpm SwissPROT>D3Z3P5_MOUSE>S4>Uncharacterized protein OS=Mus musculus GN=Plvap SwissPROT>HNRPM_MOUSE>S488>Isoform 2 of Heterogeneous nuclear ribonucleo…	R.MGLS*MDR.M	S4	UNI:G3X924	1.1949e+06	1.1949e+06	361560	1627930	2472248	317863	3.01667e+06	783391	3722919	4653659	2906722	0.396099	0.0396527	450.173	0.502592	28.67	100	0.489964	2	0		73921754	Plasmalemma vesicle-associated protein (Plasmalemma vesicle protein 1) (PV-1) (MECA-32 antigen)	G3X924	PLVAP_MOUSE		369928	0.502592	F	28.67	nucleus integral to membrane	mRNA processing transport actin filament organization	nucleotide binding protein homodimerization activity	Spliceosome
1958819	Splicing factor, arginine/serine-rich 19	Manual Assigned Name:Splicing factor, arginine/serine-rich 19 IPI>Q5U4C3>S676S682>Splicing factor, arginine/serine-rich 19 IPI>IPI00344430.2>S676S682>Scaf1 Isoform 1 of Splicing factor, arginine/serine-rich 19 NCBI>81883604>S676S682>Splicing factor, arginine/serine-rich 19 NCBI>116283904>S676S682>Scaf1 protein [Mus musculus] [MASS=133841] NCBI>56969239>S676S682>Serine arginine-rich pre-mRNA splic…	R.APS*PAPAVS*PK.R	S676S682	UNI:Q5U4C3	1.86113e+06	1.86113e+06	1325729	2230202	1963007	1925587	4.50421e+06	4479282	5150198	6593261	1794099	0.413198	0.0440467	591.254	0.424884	30.04	100	0.892814	2	0		81883604	Splicing factor, arginine/serine-rich 19	Q5U4C3	SFR19_MOUSE		390221	0.213288	F	30.04	nucleus	mRNA processing	RNA binding
1959657	Pyruvate carboxylase, mitochondrial	Manual Assigned Name:Pyruvate carboxylase, mitochondrial SwissPROT>PYC_MOUSE>S20>"Pyruvate carboxylase, mitochondrial OS=Mus musculus GN=Pc" SwissPROT>Q3T9S7_MOUSE>S21>Putative uncharacterized protein OS=Mus musculus GN=Pcx IPI>Q05920>S20>Pyruvate carboxylase, mitochondrial IPI>IPI00114710.3>S20>Pcx Pyruvate carboxylase, mitochondrial IPI>IPI00943457.1>S20>Pcx pyruvate carboxylase isoform 1 IPI>E…	R.SS*SAPVASPNVR.R	S20	UNI:Q05920	1.44137e+06	1.44137e+06	1123787	1954281	1311904	1375489	3.46573e+06	2660517	4359176	3557023	3286208	0.415891	0.00652705	626.29	0.361146	29.42		0.789363	2	0		464506	Pyruvate carboxylase, mitochondrial precursor (Pyruvic carboxylase) (PCB)	Q05920	Q3T9S7_MOUSE		384196	0.361146	F	29.42	cytoplasm	metabolic process	ATP binding	Pyruvate metabolism Citrate cycle (TCA cycle)
1960267	Pyruvate carboxylase, mitochondrial	Manual Assigned Name:Pyruvate carboxylase, mitochondrial SwissPROT>PYC_MOUSE>S19>"Pyruvate carboxylase, mitochondrial OS=Mus musculus GN=Pc" SwissPROT>Q3T9S7_MOUSE>S20>Putative uncharacterized protein OS=Mus musculus GN=Pcx IPI>Q05920>S19>Pyruvate carboxylase, mitochondrial IPI>IPI00114710.3>S19>Pcx Pyruvate carboxylase, mitochondrial IPI>IPI00943457.1>S19>Pcx pyruvate carboxylase isoform 1 IPI>E…	R.S*SSAPVASPNVR.R	S19	UNI:Q05920	1.44137e+06	1.44137e+06	1123787	1954281	1311904	1375489	3.46573e+06	2660517	4359176	3557023	3286208	0.415891	0.00652705	626.291	1.38865	24.18	16.8049	0.509021	2	0		464506	Pyruvate carboxylase, mitochondrial precursor (Pyruvic carboxylase) (PCB)	Q05920	Q3T9S7_MOUSE		384196	1.38865	F	24.18	cytoplasm	metabolic process	ATP binding	Pyruvate metabolism Citrate cycle (TCA cycle)
1960219	Rab GTPase-activating protein 1	Manual Assigned Name:Rab GTPase-activating protein 1 SwissPROT>A2AWA7_MOUSE>S42>RAB GTPase activating protein 1 (Fragment) OS=Mus musculus GN=Rabgap1 IPI>A2AWA9>S42>Rab GTPase-activating protein 1 IPI>A2AWA7>S42>RAB GTPase activating protein 1 (Fragment) IPI>A2AWA9-2>S42>Isoform 2 of Rab GTPase-activating protein 1 IPI>IPI00227356.1>S42>Rabgap1 Isoform 2 of Rab GTPase-activating protein 1 IPI>IPI…	R.QGDETPSTNNGS*DDEKTGLK.I	S42	UNI:A2AWA9	509704	509704	477915	478218	522050	560635	1.17156e+06	1134226	1136205	863431	1552384	0.435064	0.0226272	724.969	0.224125	24.93	12.3347	0.710332	3	0		156633606	Rab GTPase-activating protein 1 (Rab6 GTPase-activating protein GAPCenA) (GAP and centrosome-associated protein)	A2AWA9	A2AWA7_MOUSE		377490	0.224125	F	24.93	cytoplasm	cell cycle	GTPase activator activity
1960239	Phosphatidylinositol 4-kinase type 2-alpha	Manual Assigned Name:Phosphatidylinositol 4-kinase type 2-alpha SwissPROT>P4K2A_MOUSE>S47>Phosphatidylinositol 4-kinase type 2-alpha OS=Mus musculus GN=Pi4k2a IPI>Q2TBE6>S47>Phosphatidylinositol 4-kinase type 2-alpha IPI>IPI00121277.1>S47>Pi4k2a Phosphatidylinositol 4-kinase type 2-alpha IPI>IPI00755898.1>S47>LOC100047698 similar to Pi4k2a protein NCBI>123779669>S47>Phosphatidylinositol 4-kinase …	R.VAAAAGSGPS*PPCSPGHDR.E	S47*	UNI:Q2TBE6	1.21271e+06	1.21271e+06	963054	1521391	1290574	1075836	2.70533e+06	1704183	2877546	2802997	3436580	0.448269	0.0246184	627.605	0.732135	36.93	19.6951	0.524301	3	0		123779669	Phosphatidylinositol 4-kinase type 2-alpha (Phosphatidylinositol 4-kinase type II-alpha)	Q2TBE6	P4K2A_MOUSE		373759	0.732135	F	36.93	membrane	phosphatidylinositol biosynthetic process	ATP binding
1959918	Clasp2 protein	Manual Assigned Name:Clasp2 protein HPRD>12054_1>S603>Cytoplasmic linker associated protein 2 SwissPROT>Q08EB6_MOUSE>S376>CLIP associating protein 2 OS=Mus musculus GN=Clasp2 IPI>B9EJA4>S376>Clasp2 protein IPI>Q08EB5>S376>Clasp2 protein IPI>Q08EB6>S376>CLIP associating protein 2 IPI>Q8BRT1>S376>CLIP-associating protein 2 IPI>IPI00407863.6>S376>Clasp2 CLIP-associating protein 2 c IPI>IPI00830860.1…	R.SRS*DIDVNAAAGAK.A	S376*	UNI:B9EJA4	860333	860333	937923	1054433	642889	806087	1.89993e+06	2158174	2478498	2162834	800225	0.452823	0.0417369	485.559	0.104492	34.6	11.9553	0.585661	3	0		77416393	CLIP-associating protein 2 (Cytoplasmic linker-associated protein 2)	B9EJA4	Q08EB6_MOUSE	12054_1	389923	0.104492	F	34.6	cytoplasm intracellular Golgi apparatus	cell cycle translational termination modification-dependent protein catabolic process cell migration	protein binding binding
1959139	Protein SMG9	Manual Assigned Name:Protein SMG9 SwissPROT>D3Z719_MOUSE>S32>Uncharacterized protein OS=Mus musculus GN=1500002O20Rik SwissPROT>SMG9_MOUSE>S32>Isoform 2 of Protein SMG9 OS=Mus musculus GN=Smg9 IPI>Q9DB90>S32>Protein SMG9 IPI>Q9DB90-2>S32>Isoform 2 of Protein SMG9 IPI>IPI00459764.2>S32>1500002O20Rik Isoform 2 of Protein SMG9 IPI>IPI00831295.1>S32>1500002O20Rik Isoform 1 of Protein SMG9 IPI>D3Z719>…	R.WKEPGSSGPQNLS*GPGGR.E	S32	UNI:Q9DB90	1.04196e+06	1.04196e+06	852949	1408472	1501707	404696	2.23827e+06	2643395	3134658	2174392	1000634	0.465518	0.0260084	630.955	0.189333	25.31	24.6364	0.676538	3	0		81906074	Uncharacterized protein C19orf61 homolog	Q9DB90	SMG9_MOUSE		369913	0.189333	F	25.31	intracellular	nuclear-transcribed mRNA catabolic process, nonsense-mediated decay	protein binding
1959641	Serine/arginine repetitive matrix 1	Manual Assigned Name:Serine/arginine repetitive matrix 1 HPRD>10441_1>S389S393>Serine arginine repetitive matrix protein 1 SwissPROT>A2A8V8_MOUSE>S387S391>Serine/arginine repetitive matrix 1 OS=Mus musculus GN=Srrm1 SwissPROT>A2A8V9_MOUSE>S382S386>Serine/arginine repetitive matrix 1 OS=Mus musculus GN=Srrm1 SwissPROT>SRRM1_MOUSE>S387S391>Isoform 2 of Serine/arginine repetitive matrix protein 1 OS…	R.RLS*PSAS*PPR.R	S387S391*	UNI:A2A8V8	8.59416e+06	8.59416e+06	5551107	9542065	11988907	7294553	1.8295e+07	11995298	20459640	22209449	18515811	0.469753	0.0113981	624.276	0.639656	26.44	18.6629	0.737585	2	0		347595715	RecName: Full=Serine/arginine repetitive matrix protein 1; AltName: Full=Plenty-of-prolines 101	A2A8V8	SRRM1_MOUSE	10441_1	375402	0.434454	F	26.44	nucleus spliceosomal complex	mRNA processing	DNA binding protein binding lysophospholipase activity zinc ion binding
1960064	Serum deprivation-response protein	Manual Assigned Name:Serum deprivation-response protein SwissPROT>SDPR_MOUSE>S363>Serum deprivation-response protein OS=Mus musculus GN=Sdpr IPI>Q63918>S363>Serum deprivation-response protein IPI>IPI00135660.5>S363>Sdpr Serum deprivation-response protein NCBI>81884028>S363>Serum deprivation-response protein (Phosphatidylserine-binding protein) NCBI>20072521>S363>serum deprivation response [Mus mu…	R.RGNNSAVGS*NADLTIEEDEEEEPVALQQAQQVR.Y	S363	UNI:Q63918	343005	343005	41607	55905		931503	697355	186619	239660	84277	2278865	0.491866	0.0285086	1232.9	0.221009	51.18	5.14105	0.858186	3	0		81884028	Serum deprivation-response protein (Phosphatidylserine-binding protein)	Q63918	SDPR_MOUSE		382219	0.221009	F	51.18	membrane	cell adhesion	protein binding
1959170	THUMP domain-containing protein 1	Manual Assigned Name:THUMP domain-containing protein 1 SwissPROT>THUM1_MOUSE>S86S88>THUMP domain-containing protein 1 OS=Mus musculus GN=Thumpd1 IPI>Q99J36>S86S88>THUMP domain-containing protein 1 IPI>IPI00114862.1>S86S88>Thumpd1;LOC100048066 THUMP domain-containing protein 1 NCBI>61248556>S86S88>THUMP domain containing protein 1 NCBI>148685232>S86S88>THUMP domain containing 1, isoform CRA_c [Mus…	K.FIDKDQQPS*GS*EGEDDDAEAALKK.E	S86S88*	UNI:Q99J36	6.46228e+06	6.46228e+06	2686817	7750201	6946341	8465749	1.28891e+07	5747446	9343100	15338550	21127501	0.501373	0.0297234	926.393	0.746445	44.16	100	0.833953	3	0		61248556	THUMP domain containing protein 1	Q99J36	THUM1_MOUSE		376371	0.746445	F	44.16
1960361	Astrocytic phosphoprotein PEA-15	Manual Assigned Name:Astrocytic phosphoprotein PEA-15 HPRD>04579_1>S116>PEA15 SwissPROT>PEA15_MOUSE>S94>Isoform 2 of Astrocytic phosphoprotein PEA-15 OS=Mus musculus GN=Pea15 IPI>Q62048>S116>Astrocytic phosphoprotein PEA-15 IPI>Q62048-2>S116>Isoform 2 of Astrocytic phosphoprotein PEA-15 IPI>IPI00121013.1>S116>Pea15a Isoform 1 of Astrocytic phosphoprotein PEA-15 IPI>IPI00336400.1>S116>Pea15a Isofo…	R.QPS*EEEIIK.L	S116*	UNI:Q62048	2.42511e+07	2.42511e+07	29994910	27344460	24232165	15432728	4.77013e+07	42437386	57168570	52857029	38342329	0.508394	0.0246184	576.763	0.414744	25.32	100	0.837613	2	0		2498751	Astrocytic phosphoprotein PEA-15	Q62048	PEA15_MOUSE	04579_1	370921	0.414744	F	25.32	cytoplasm mitochondrion	transport regulation of apoptosis	protein binding
1958617	Acetyl-CoA carboxylase 1	Manual Assigned Name:Acetyl-CoA carboxylase 1 HPRD>01938_1>S66>Acetyl-CoA carboxylase alpha HPRD>01938_2>S29>Acetyl-CoA carboxylase alpha HPRD>01938_3>S29>Acetyl-CoA carboxylase alpha HPRD>01938_6>S66>Acetyl-CoA carboxylase alpha HPRD>01938_7>S29>Acetyl-CoA carboxylase alpha SwissPROT>ACACA_MOUSE>S67>Isoform 2 of Acetyl-CoA carboxylase 1 OS=Mus musculus GN=Acaca IPI>Q5SWU9>S29>Acetyl-CoA carboxyl…	R.FIIGSVSEDNS*EDEISNLVK.L	S29*	UNI:Q5SWU9	8.74726e+06	8.74726e+06	9946298	11247682	13744072	51008	1.69168e+07	13462760	15937764	21349787		0.517077	0.0246184	1142.03	0.380193	25.5	25.4411	0.716008	2	0		81862571	Acetyl-CoA carboxylase 1 (ACC-alpha) (Acetyl-CoA carboxylase 265) [Includes: Biotin carboxylase ]	Q5SWU9	ACACA_MOUSE	01938_7	371924	0.380193	F	25.5	cytoplasm	metabolic process	protein binding	Pyruvate metabolism Propanoate metabolism Fatty acid biosynthesis Insulin signaling pathway
1959268	Trans-Golgi network integral membrane protein 1	Manual Assigned Name:Trans-Golgi network integral membrane protein 1 SwissPROT>TGON1_MOUSE>S266>Trans-Golgi network integral membrane protein 1 OS=Mus musculus GN=Tgoln1 IPI>Q62313>S266>Trans-Golgi network integral membrane protein 1 IPI>IPI00408895.2>S266>Tgoln1 Trans-Golgi network integral membrane protein 1 NCBI>38372553>S266>Trans-Golgi network integral membrane protein 1 precursor (TGN38A) N…	K.VPGPS*SSENQEGTLTDSMK.N	S266	UNI:Q62313	1.80685e+06	1.80685e+06	3011729	1405351	1717932	1092389	3.2441e+06	3891337	3932466	3591707	1560907	0.556964	0.0351547	1026.44	0.585807	58.39	12.0862	0.859201	2	0		38372553	Trans-Golgi network integral membrane protein 1 precursor (TGN38A)	Q62313	TGON1_MOUSE		385289	0.585807	F	58.39	integral to membrane	peptide cross-linking	protein binding
1960387	Trans-Golgi network integral membrane protein 1	Manual Assigned Name:Trans-Golgi network integral membrane protein 1 SwissPROT>TGON1_MOUSE>S267>Trans-Golgi network integral membrane protein 1 OS=Mus musculus GN=Tgoln1 IPI>Q62313>S267>Trans-Golgi network integral membrane protein 1 IPI>IPI00408895.2>S267>Tgoln1 Trans-Golgi network integral membrane protein 1 NCBI>38372553>S267>Trans-Golgi network integral membrane protein 1 precursor (TGN38A) N…	K.VPGPSS*SENQEGTLTDSMK.N	S267	UNI:Q62313	1.80685e+06	1.80685e+06	3011729	1405351	1717932	1092389	3.2441e+06	3891337	3932466	3591707	1560907	0.556964	0.0351547	1022.43	0.744671	52.84	6.53213	0.784245	2	0		38372553	Trans-Golgi network integral membrane protein 1 precursor (TGN38A)	Q62313	TGON1_MOUSE		385289	0.744671	F	52.84	integral to membrane	peptide cross-linking	protein binding
1960008	Cleavage stimulation factor subunit 3	Manual Assigned Name:Cleavage stimulation factor subunit 3 HPRD>02651_1>S691>Cleavage stimulation factor, 3 Prime pre-RNA, subunit 3, 77kDa SwissPROT>CSTF3_MOUSE>S691>Cleavage stimulation factor subunit 3 OS=Mus musculus GN=Cstf3 IPI>Q99LI7>S691>Cleavage stimulation factor subunit 3 IPI>IPI00116929.1>S691>Cstf3 Cleavage stimulation factor subunit 3 NCBI>71153232>S691>Cleavage stimulation factor 7…	K.RPNEDS*DEDEEKGAVVPPVHDIYR.A	S691*	UNI:Q99LI7	2.2517e+06	2.2517e+06	339587	467759	82068	8117400	4.0292e+06	2688029	1382241	976184	11070364	0.558846	0.0388827	712.321	0.256477	21.4	18.2621	0.769223	4	0		71153232	Cleavage stimulation factor 77 kDa subunit (CSTF 77 kDa subunit) (CstF-77) (CF-1 77 kDa subunit)	Q99LI7	CSTF3_MOUSE	02651_1	374602	0.256477	F	21.4	nucleus	mRNA processing	protein binding
1960139	Heme oxygenase 1	Manual Assigned Name:Heme oxygenase 1 SwissPROT>HMOX1_MOUSE>S174>Heme oxygenase 1 OS=Mus musculus GN=Hmox1 IPI>P14901>S174>Heme oxygenase 1 IPI>IPI00131577.1>S174>Hmox1 Heme oxygenase 1 NCBI>123447>S174>Heme oxygenase 1 (HO-1) (P32 protein) NCBI>14789658>S174>heme oxygenase (decycling) 1 [Mus musculus] NCBI>817961>S174>haem oxygenase [Mus musculus] NCBI>200187>S174>32 kD protein NCBI>53555>S174>h…	K.AMALPSSGEGLAFFTFPNIDS*PTK.F	S174	UNI:P14901	2.23483e+06	2.23483e+06	2724139	2246473	1733873		3.92942e+06	4142017	5306267	2339973		0.568743	0.0470415	862.74	0.391693	26.7	10.8814	0.631844	3	0		123447	Heme oxygenase 1 (HO-1) (P32 protein)	P14901	HMOX1_MOUSE		370331	0.391693	F	26.7	nucleus	oxidation reduction	metal ion binding	Porphyrin and chlorophyll metabolism
1959209	Ras GTPase-activating protein-binding protein 2	Manual Assigned Name:Ras GTPase-activating protein-binding protein 2 SwissPROT>G3B2_MOUSE>T227>Ras-GTPase-activating protein binding protein 2 (GAP SH3-domain binding protein 2) (G3BP-2) SwissPROT>G3BP2_MOUSE>T227>Isoform B of Ras GTPase-activating protein-binding protein 2 OS=Mus musculus GN=G3bp2 IPI>P97379>T227>Ras GTPase-activating protein-binding protein 2 IPI>P97379-2>T227>Isoform B of Ras …	K.SAT*PPPAEPASLPQEPPK.A	T227*	UNI:P97379	1.19099e+07	1.19099e+07	10555730	12512597	12916858	11654587	1.94087e+07	12690834	23483638	20818837	20641596	0.613639	0.0269635	631.972	0.500026	29.66		0.781487	3	0		14916570	Ras-GTPase-activating protein binding protein 2 (GAP SH3-domain binding protein 2) (G3BP-2)	P97379	G3BP2_MOUSE		375703	0.500026	F	29.66	intracellular	transport	protein binding
1958637	Paxillin	Manual Assigned Name:Paxillin SwissPROT>PAXI_MOUSE>S287>Isoform Alpha of Paxillin OS=Mus musculus GN=Pxn IPI>Q8VI36>S321>Paxillin IPI>Q8VI36-2>S321>Isoform Alpha of Paxillin IPI>IPI00165881.3>S321>Pxn Isoform Beta of Paxillin IPI>IPI00128703.3>S321>Pxn Isoform Alpha of Paxillin IPI>F8VQ28>S321>Uncharacterized protein NCBI>81902126>S321>Paxillin NCBI>18461379>S321>paxillin beta [Mus musculus] NCBI…	K.TGSS*SPPGGLSKPGSQLDSMLGSLQSDLNK.L	S321	UNI:Q8VI36	2.15725e+06	2.15725e+06	786121	4071104	1408999	2362763	3.45057e+06	1479623	5853058	2706960	3762632	0.625186	0.022144	1009.15	0.944662	44.9	1.19186	0.394065	3	0		81902126	Paxillin	Q8VI36	PAXI_MOUSE		390839	0.944662	F	44.9	cytoplasm	cell adhesion	protein binding	Regulation of actin cytoskeleton Focal adhesion Chemokine signaling pathway VEGF signaling pathway Leukocyte transendothelial migration
1958638	Paxillin	Manual Assigned Name:Paxillin SwissPROT>PAXI_MOUSE>S294>Isoform Alpha of Paxillin OS=Mus musculus GN=Pxn IPI>Q8VI36>S328>Paxillin IPI>Q8VI36-2>S328>Isoform Alpha of Paxillin IPI>IPI00165881.3>S328>Pxn Isoform Beta of Paxillin IPI>IPI00128703.3>S328>Pxn Isoform Alpha of Paxillin IPI>F8VQ28>S328>Uncharacterized protein NCBI>81902126>S328>Paxillin NCBI>18461379>S328>paxillin beta [Mus musculus] NCBI…	K.TGSSSPPGGLS*KPGSQLDSMLGSLQSDLNK.L	S328	UNI:Q8VI36	2.15725e+06	2.15725e+06	786121	4071104	1408999	2362763	3.45057e+06	1479623	5853058	2706960	3762632	0.625186	0.022144	1014.49	1.99181	27.09		0.145689	3	0		81902126	Paxillin	Q8VI36	PAXI_MOUSE		390839	1.99181	F	27.09	cytoplasm	cell adhesion	protein binding	Regulation of actin cytoskeleton Focal adhesion Chemokine signaling pathway VEGF signaling pathway Leukocyte transendothelial migration
1959198	Trans-Golgi network integral membrane protein 2	Manual Assigned Name:Trans-Golgi network integral membrane protein 2 SwissPROT>TGON2_MOUSE>S277>Trans-Golgi network integral membrane protein 2 OS=Mus musculus GN=Tgoln2 IPI>Q62314>S277>Trans-Golgi network integral membrane protein 2 IPI>IPI00124572.1>S277>Tgoln2 Trans-Golgi network integral membrane protein 2 NCBI>38372554>S277>Trans-Golgi network integral membrane protein 2 precursor (TGN38B) N…	K.VSGPSS*SENQEGTLTDSMK.N	S277	UNI:Q62314	2.03912e+06	2.03912e+06	1619383	2380279	2394304	1762526	3.24572e+06	2358284	4252236	3766874	2605477	0.62825	0.016086	1021.43	0.537747	49.11	8.22355	0.761039	2	0		38372554	Trans-Golgi network integral membrane protein 2 precursor (TGN38B)	Q62314	TGON2_MOUSE			0.537747	F	49.11	integral to membrane	peptide cross-linking	protein binding
1960338	Pre-mRNA 3'-end-processing factor FIP1	Manual Assigned Name:Pre-mRNA 3'-end-processing factor FIP1 HPRD>09646_1>S492>FIP1 like 1 SwissPROT>D3Z3F1_MOUSE>S487>Uncharacterized protein OS=Mus musculus GN=Fip1l1 SwissPROT>D3Z4V2_MOUSE>S493>Uncharacterized protein OS=Mus musculus GN=Fip1l1 SwissPROT>D3Z619_MOUSE>S428>Uncharacterized protein OS=Mus musculus GN=Fip1l1 IPI>Q9D824>S479>Pre-mRNA 3'-end-processing factor FIP1 IPI>Q9D824-2>S479>Is…	R.ERDHS*PTPSVFNSDEER.Y	S479*	UNI:Q9D824	2.45281e+06	2.45281e+06	3103118	3231598	1730059	1746450	3.72894e+06	4349551	3897736	3373866	3294588	0.657777	0.0312601	694.623	0.678722	28.73	5.6244	0.857601	3	0		81881579	Pre-mRNA 3'-end-processing factor FIP1 (FIP1-like 1)	Q9D824	D3Z619_MOUSE	09646_1	388692	0.678722	F	28.73	nucleus	mRNA processing	RNA binding
1959826	Nuclear factor 1	Manual Assigned Name:Nuclear factor 1 HPRD>09007_1>S287>Nuclear factor I/A SwissPROT>B1AUB9_MOUSE>S265>Nuclear factor 1 OS=Mus musculus GN=Nfia SwissPROT>B1AUC0_MOUSE>S287>Nuclear factor 1 OS=Mus musculus GN=Nfia SwissPROT>NFIA_MOUSE>S287>Isoform 7 of Nuclear factor 1 A-type OS=Mus musculus GN=Nfia IPI>B1AUB9>S265>Nuclear factor 1 IPI>B1AUC0>S265>Nuclear factor 1 IPI>E9Q7H3>S265>Nuclear factor 1 …	K.SVEDEMDS*PGEEPFYTGQGR.S	S265*	UNI:B1AUB9	2.79206e+06	2.79206e+06	1033493	5034883	3239557	1860287	4.21109e+06	1912225	8362056	4647663	1922412	0.663025	0.0396527	1160.45	0.190526	52.51	42.2999	0.85417	2	0		14194972	Nuclear factor 1 A-type (Nuclear factor 1/A) (NF1-A) (NFI-A) (NF-I/A) (CCAAT-box binding transcription factor) (CTF) (TGGCA-binding protein)	B1AUB9	NFIA_MOUSE	09007_1	387260	0.190526	F	52.51	nucleus	regulation of transcription, DNA-dependent	protein binding DNA binding
1959941	SH3 and PX domain-containing protein 2A	Manual Assigned Name:SH3 and PX domain-containing protein 2A HPRD>10228_1>S393>SH3 multiple domains 1 SwissPROT>SPD2A_MOUSE>S377>Isoform 3 of SH3 and PX domain-containing protein 2A OS=Mus musculus GN=Sh3pxd2a IPI>O89032>S420>SH3 and PX domain-containing protein 2A IPI>O89032-2>S420>Isoform 2 of SH3 and PX domain-containing protein 2A IPI>O89032-3>S420>Isoform 3 of SH3 and PX domain-containing pr…	R.AQISS*PNLR.T	S420	UNI:O89032	852184	852184	585322	857077	1052196	914141	1.27593e+06	971619	1490700	1350714	1290701	0.66789	0.0246184	538.262	0.277076	23.81	13.8917	0.731067	2	0		341942061	RecName: Full=SH3 and PX domain-containing protein 2A; AltName: Full=Five SH3 domain-containing protein; AltName: Full=SH3 multiple domains protein 1; AltName: Full=Tyrosine kinase substrate with five SH3 domains	O89032	SPD2A_MOUSE	10228_1	389158	0.277076	F	23.81	cytoplasm integral to membrane dynein complex	cell communication	protein binding
1960110	Patatin-like phospholipase domain-containing protein 2	Manual Assigned Name:Patatin-like phospholipase domain-containing protein 2 SwissPROT>PLPL2_MOUSE>S350>Isoform 3 of Patatin-like phospholipase domain-containing protein 2 OS=Mus musculus GN=Pnpla2 IPI>Q8BJ56>S406>Patatin-like phospholipase domain-containing protein 2 IPI>Q8BJ56-2>S406>Isoform 2 of Patatin-like phospholipase domain-containing protein 2 IPI>Q8BJ56-3>S406>Isoform 3 of Patatin-like p…	R.AQS*LPSVPLSCATYSEALPNWVR.N	S406	UNI:Q8BJ56	9.56437e+06	9.56437e+06	9603978	12998863	6090255		1.43141e+07	15772893	18725389	8443992		0.668178	0.0264414	1313.62	0.830847	27.29	37.2961	0.707876	2	0		81896337	Patatin-like phospholipase domain-containing protein 2 (Adipose triglyceride lipase) (Desnutrin)	Q8BJ56	PLPL2_MOUSE		373907	0.830847	F	27.29	integral to membrane	metabolic process	hydrolase activity
1960253	[3-methyl-2-oxobutanoate dehydrogenase [lipoamide]] kinase, mitochondrial	Manual Assigned Name:[3-methyl-2-oxobutanoate dehydrogenase [lipoamide]] kinase, mitochondrial SwissPROT>BCKD_MOUSE>S33>"[3-methyl-2-oxobutanoate dehydrogenase [lipoamide]] kinase, mitochondrial OS=Mus musculus GN=Bckdk" SwissPROT>D3Z7R0_MOUSE>S33>Uncharacterized protein OS=Mus musculus GN=Bckdk IPI>O55028>S33>[3-methyl-2-oxobutanoate dehydrogenase [lipoamide]] kinase, mitochondrial IPI>IPI001150…	R.STS*ATDTHHVELAR.E	S33*	UNI:O55028	537429	537429	469690	498280	696958	484788	804139	572782	758285	969331	916156	0.668329	0.0285086	807.861	0.335663	62.12		0.931692	2	0		6685240	[3-methyl-2-oxobutanoate dehydrogenase [lipoamide]] kinase, mitochondrial precursor (Branched-chain alpha-ketoacid dehydrogenase kinase) (BCKDHKIN) (BCKD-kinase)	O55028	D3Z7R0_MOUSE		385760	0.335663	F	62.12	mitochondrion	signal transduction	protein binding
1960039	Protein FAM73B	Manual Assigned Name:Protein FAM73B SwissPROT>FA73B_MOUSE>T208>Isoform 2 of Protein FAM73B OS=Mus musculus GN=Fam73b IPI>Q8BK03>T208>Protein FAM73B IPI>Q8BK03-2>T208>Isoform 2 of Protein FAM73B IPI>IPI00222443.1>T208>Fam73b Isoform 1 of Protein FAM73B IPI>IPI00652506.1>T208>Fam73b Isoform 2 of Protein FAM73B NCBI>81896427>T208>Protein FAM73B NCBI>74178322>T275>unnamed protein product [Mus musculu…	R.GDGGSTPT*PGDSLQNPDTASEALSEPESQR.R	T208	UNI:Q8BK03	2.06551e+06	2.06551e+06	945745	3078198	2338573	1899542	3.01853e+06	1262168	4604359	3296010	2911591	0.684278	0.0114398	1030.77	1.06106	20.67		0.173989	3	0		81896427	Protein FAM73B	Q8BK03	FA73B_MOUSE		388009	1.06106	F	20.67	integral to membrane	oxidation reduction	protein binding
1959048	BAG family molecular chaperone regulator 3	Manual Assigned Name:BAG family molecular chaperone regulator 3 SwissPROT>A6H663_MOUSE>S270S274>BCL2-associated athanogene 3 OS=Mus musculus GN=Bag3 SwissPROT>BAG3_MOUSE>S270S274>BAG family molecular chaperone regulator 3 OS=Mus musculus GN=Bag3 IPI>Q9JLV1>S270S274>BAG family molecular chaperone regulator 3 IPI>IPI00331334.3>S270S274>Bag3 BAG family molecular chaperone regulator 3 IPI>IPI00387388…	R.AAS*PFRS*PVR.G	S270S274*	UNI:Q9JLV1	3.13013e+06	3.13013e+06	2600631	3992287	4340278	1587307	4.51722e+06	3749034	5577754	5377092	3365013	0.692931	0.0335436	423.188	0.353438	29.7	100	0.924969	3	0		341940275	RecName: Full=BAG family molecular chaperone regulator 3; Short=BAG-3; AltName: Full=Bcl-2-associated athanogene 3; AltName: Full=Bcl-2-binding protein Bis	Q9JLV1	BAG3_MOUSE		376328	0.150684	F	29.7	cytosol	apoptosis	protein binding
1958635	Patatin-like phospholipase domain-containing protein 2	Manual Assigned Name:Patatin-like phospholipase domain-containing protein 2 SwissPROT>PLPL2_MOUSE>S353>Isoform 3 of Patatin-like phospholipase domain-containing protein 2 OS=Mus musculus GN=Pnpla2 IPI>Q8BJ56>S409>Patatin-like phospholipase domain-containing protein 2 IPI>Q8BJ56-2>S409>Isoform 2 of Patatin-like phospholipase domain-containing protein 2 IPI>Q8BJ56-3>S409>Isoform 3 of Patatin-like p…	R.AQSLPS*VPLSCATYSEALPNWVR.N	S409	UNI:Q8BJ56	8.56636e+06	8.56636e+06	9603978	12998863	6090255	5572349	1.21838e+07	15772893	18725389	8443992	5793038	0.703093	0.0370142	1318.63	0.852727	52.69	16.9461	0.868256	2	0		81896337	Patatin-like phospholipase domain-containing protein 2 (Adipose triglyceride lipase) (Desnutrin)	Q8BJ56	PLPL2_MOUSE		373907	0.816313	F	52.69	integral to membrane	metabolic process	hydrolase activity
1960331	Oxysterol-binding protein	Manual Assigned Name:Oxysterol-binding protein IPI>E9QPD4>S188S191>Oxysterol-binding protein IPI>Q3B7Z2>S188S191>Oxysterol-binding protein 1 IPI>IPI00755161.2>S188S191>Osbp oxysterol-binding protein 1 NCBI>205829307>S134S137>RecName: Full=Oxysterol-binding protein 1 [MASS=84689] NCBI>78070557>S131S134>Osbp protein [Mus musculus] [MASS=84415] NCBI>78070555>S131S134>Osbp protein [Mus musculus] NCBI…	K.MLAES*DDS*GDEESVSQTDK.T	S188S191	UNI:E9QPD4	1.08932e+06	1.08932e+06	794443	2169091	1180185	213581	1.54687e+06	1052045	2843514	2019839	272085	0.704212	0.0264414	737.599	0.935415	28.86	59.0216	0.766994	3	0		205829307	RecName: Full=Oxysterol-binding protein 1 [MASS=84689]	E9QPD4	E9QPD4_MOUSE		391674	0.935415	F	28.86	membrane	transport	protein binding
1960205	ATP citrate lyase	Manual Assigned Name:ATP citrate lyase HPRD>00155_1>S455>ATP citrate lyase HPRD>00155_2>S455>ATP citrate lyase SwissPROT>ACLY_MOUSE>S455>ATP-citrate synthase OS=Mus musculus GN=Acly SwissPROT>Q3TS02_MOUSE>S455>ATP citrate lyase OS=Mus musculus GN=Acly SwissPROT>Q3V117_MOUSE>S455>ATP citrate lyase OS=Mus musculus GN=Acly IPI>Q3TS02>S455>ATP citrate lyase IPI>Q3V117>S455>ATP citrate lyase IPI>Q91V9…	R.TAS*FSESR.A	S455*	UNI:Q3TS02	3.26919e+06	3.26919e+06	2900887	4573391	4326784	1275707	4.61359e+06	3685402	7152378	5886331	1730245	0.708601	0.0226272	482.693	0.661566	36.34	16.118	0.921667	2	0		14193672	ATP citrate lyase [Mus musculus]	Q3TS02	Q3V117_MOUSE	00155_2	370550	0.661566	F	36.34	cytoplasm intracellular integral to membrane intrinsic to membrane	metabolic process acetyl-CoA biosynthetic process	ATP binding protein binding binding	Citrate cycle (TCA cycle) Reductive carboxylate cycle (CO2 fixation)
1959628	Luc7-like protein 3	Manual Assigned Name:Luc7-like protein 3 HPRD>16759_1>S425S431>Cisplatin resistance associated overexpressed protein HPRD>16759_2>S425S431>Cisplatin resistance associated overexpressed protein IPI>Q5SUF2>S425S431>Luc7-like protein 3 IPI>IPI00649422.1>S425S431>Luc7l3 Isoform 1 of Luc7-like protein 3 NCBI>81862464>S425S431>Cisplatin resistance-associated overexpressed protein NCBI>56237964>S425S431…	K.NEVNGTSEDIKS*EGDTQS*N.-	S425S431	UNI:Q5SUF2	966551	966551	534918	1161778	1055190	1114319	1.35349e+06	761979	1889722	1688118	1074153	0.714116	0.0440881	731.276	0.612278	29.68	20.6055	0.8677	3	0		81862464	Cisplatin resistance-associated overexpressed protein	Q5SUF2	LC7L3_MOUSE	16759_2		0.612278	F	29.68	nucleus	apoptosis	protein binding
1960229	Luc7-like protein 3	Manual Assigned Name:Luc7-like protein 3 HPRD>16759_1>S425T429>Cisplatin resistance associated overexpressed protein HPRD>16759_2>S425T429>Cisplatin resistance associated overexpressed protein IPI>Q5SUF2>S425T429>Luc7-like protein 3 IPI>IPI00649422.1>S425T429>Luc7l3 Isoform 1 of Luc7-like protein 3 NCBI>81862464>S425T429>Cisplatin resistance-associated overexpressed protein NCBI>56237964>S425T429…	K.NEVNGTSEDIKS*EGDT*QSN.-	S425T429	UNI:Q5SUF2	966551	966551	534918	1161778	1055190	1114319	1.35349e+06	761979	1889722	1688118	1074153	0.714116	0.0440881	731.276	1.36508	25.74	13.6941	0.941869	3	0		81862464	Cisplatin resistance-associated overexpressed protein	Q5SUF2	LC7L3_MOUSE	16759_2		1.36508	F	25.74	nucleus	apoptosis	protein binding
1959345	Oxysterol-binding protein-related protein 11	Manual Assigned Name:Oxysterol-binding protein-related protein 11 SwissPROT>OSB11_MOUSE>S186>Oxysterol-binding protein-related protein 11 OS=Mus musculus GN=Osbpl11 SwissPROT>OSR11_MOUSE>S186>Oxysterol binding protein-related protein 11 (OSBP-related protein 11) (ORP-11) IPI>Q8CI95>S186>Oxysterol-binding protein-related protein 11 IPI>IPI00229798.2>S186>Osbpl11 oxysterol binding protein-like 11 I…	R.SFSLASSGNS*PISQR.R	S186*	UNI:Q8CI95	1.15464e+07	1.15464e+07	5624638	14557210	13609109	12394807	1.60243e+07	9665617	20336306	17121789	16973653	0.720556	0.0246184	814.37	1.38352	61.67	43.4475	0.887927	2	0		46396418	Oxysterol binding protein-related protein 11 (OSBP-related protein 11) (ORP-11) [MASS=83629]	Q8CI95	OSR11_MOUSE		378244	0.339122	F	61.67	endoplasmic reticulum lumen nucleus	transport	protein binding GTP binding
1959886	Translocating chain-associated membrane protein 1	Manual Assigned Name:Translocating chain-associated membrane protein 1 SwissPROT>TRAM1_MOUSE>S365>Translocating chain-associated membrane protein 1 OS=Mus musculus GN=Tram1 IPI>Q91V04>S365>Translocating chain-associated membrane protein 1 IPI>IPI00125907.3>S365>Tram1 Translocating chain-associated membrane protein 1 NCBI>50401639>S365>Translocation associated membrane protein 1 NCBI>148682376>S36…	R.KGTENGVNGTVTSNGADS*PR.N	S365*	UNI:Q91V04	219472	219472	184690	174342	69083	449772	300465	249717	295115	116946	540080	0.730441	0.0275759	686.979	0.499776	28.1	33.7104	0.593481	3	0		50401639	Translocation associated membrane protein 1	Q91V04	TRAM1_MOUSE		374054	0.499776	F	28.1	integral to membrane	transport	protein binding
1959869	Nuclear pore complex-associated intranuclear coiled-coil protein TPR	Manual Assigned Name:Nuclear pore complex-associated intranuclear coiled-coil protein TPR SwissPROT>Q7M739_MOUSE>Nuclear pore complex-associated intranuclear coiled-coil protein TPR OS=Mus musculus GN=Tpr SwissPROT>Q8BIX0_MOUSE>Putative uncharacterized protein OS=Mus musculus GN=Tpr SwissPROT>Q91ZA5_MOUSE>Nuclear pore complex-associated intranuclear protein TPR (Fragment) OS=Mus musculus GN=Tpr I…	R.QTPQAPQS*PR.R	S2067	UNI:Q7M739	949541	949541	942875	1098260	894628	862401	1.29117e+06	1273185	1205408	1417096	1268981	0.735413	0.0312601	600.276	0.526867	28.68	40.8839	0.713378	2	0		19909186	translocated promoter region protein [Mus musculus]	Q7M739	Q7M739_MOUSE		370415	0.526867	F	28.68	cytoplasm nuclear pore	translation mitotic cell cycle spindle assembly checkpoint	protein binding	Pathways in cancer MAPK signaling pathway - yeast Thyroid cancer
1958680	Polymerase I and transcript release factor	Manual Assigned Name:Polymerase I and transcript release factor SwissPROT>PTRF_MOUSE>T198S218>Polymerase I and transcript release factor OS=Mus musculus GN=Ptrf IPI>O54724>T198S218>Polymerase I and transcript release factor IPI>IPI00117689.1>T198S218>Ptrf Polymerase I and transcript release factor NCBI>56749456>T198S218>Polymerase I and transcript release factor [MASS=43953] NCBI>18140061>T198S21…	K.EGDELGEGERPEDDT*AAIELSSDEAVEVEEVIEES*R.A	T198S218*	UNI:O54724	7.05765e+06	7.05765e+06	5649017	7928173	7595773		9.55247e+06	6358997	12132230	10166190		0.73883	0.0464113	1028.93	0.228074	25.89	17.1886	0.591117	4	0		56749456	Polymerase I and transcript release factor [MASS=43953]	O54724	PTRF_MOUSE		382871	0.128869	F	25.89	nucleus	regulation of transcription	protein binding
1958786	Calnexin	Manual Assigned Name:Calnexin SwissPROT>CALX_MOUSE>S563>Calnexin OS=Mus musculus GN=Canx IPI>P35564>S563>Calnexin IPI>IPI00119618.1>S563>Canx Calnexin NCBI>543921>S563>Calnexin precursor NCBI>148701758>S563>calnexin, isoform CRA_a [Mus musculus] [MASS=67277] NCBI>148701757>S563>calnexin, isoform CRA_a [Mus musculus] NCBI>148701756>S563>calnexin, isoform CRA_a [Mus musculus] NCBI>56206506>S563>cal…	K.SDAEEDGVTGS*QDEEDSKPK.A	S563*	UNI:P35564	1.07268e+06	1.07268e+06	288438	1570617	1814713	616946	1.4357e+06	571317	2285196	2013317	872980	0.747145	0.0370747	734.956	0.904282	38.26	17.862	0.696868	3	0		543921	Calnexin precursor	P35564	CALX_MOUSE		371849	0.904282	F	38.26	integral to membrane	protein folding	protein binding	Antigen processing and presentation
1958949	Proline-rich AKT1 substrate 1	Manual Assigned Name:Proline-rich AKT1 substrate 1 HPRD>12441_1>T246>AKT1 substrate 1 HPRD>12441_2>T246>AKT1 substrate 1 HPRD>12441_3>T246>AKT1 substrate 1 SwissPROT>AKTS1_MOUSE>T247>Proline-rich AKT1 substrate 1 OS=Mus musculus GN=Akt1s1 IPI>Q9D1F4>T247>Proline-rich AKT1 substrate 1 IPI>IPI00133685.1>T247>Akt1s1 Proline-rich AKT1 substrate 1 IPI>E9QKI4>T247>Uncharacterized protein IPI>E9QKI5>T24…	R.LNT*SDFQK.L	T247*	UNI:Q9D1F4	4.10288e+06	4.10288e+06	3699512	4493161	3695950	4522887	5.4635e+06	5212934	5499215	4456656	6685180	0.750962	0.0246184	516.723	0.360312	36.55	39.9127	0.957346	2	0		81881209	Proline-rich AKT1 substrate 1 (Proline-rich AKT substrate)	Q9D1F4	AKTS1_MOUSE	12441_3	380756	0.011623	F	36.55	cytoplasm	negative regulation of protein kinase activity	protein binding
1959917	High mobility group protein HMG-I/HMG-Y	Manual Assigned Name:High mobility group protein HMG-I/HMG-Y HPRD>02829_1>S102S103>High mobility group AT hook 1 HPRD>02829_2>S91S92>High mobility group AT hook 1 HPRD>02829_3>S102S103>High mobility group AT hook 1 HPRD>02829_4>S91S92>High mobility group AT hook 1 HPRD>02829_5>S91S92>High mobility group AT hook 1 HPRD>02829_6>S102S103>High mobility group AT hook 1 HPRD>02829_7>S91S92>High mobilit…	K.KLEKEEEEGISQES*S*EEEQ.-	S102S103	UNI:P17095	5.05303e+06	5.05303e+06	59764	108938	23212	20020192	6.63963e+06	58140	106269		19754469	0.761041	0.0335436	799.646	0.826476	30.04	20.4191	0.963442	3	0		57015348	High mobility group protein HMG-I/HMG-Y (HMG-I(Y)) (High mobility group AT-hook 1) [MASS=11614]	P17095	HMGIY_MOUSE	02829_7	383821	0.826476	F	30.04	nucleus	regulation of transcription, DNA-dependent	protein binding DNA binding
1960171	SRA stem-loop-interacting RNA-binding protein, mitochondrial	Manual Assigned Name:SRA stem-loop-interacting RNA-binding protein, mitochondrial IPI>Q9D8T7>SRA stem-loop-interacting RNA-binding protein, mitochondrial IPI>IPI00318935.2>1810035L17Rik Isoform 1 of SRA stem-loop-interacting RNA-binding protein, mitochondrial IPI>F8WHU8>Uncharacterized protein (Fragment) IPI>IPI00919281.1>1810035L17Rik 11 kDa protein NCBI>110816418>SRA stem-loop-interacting RNA-b…	K.ALHGAQTS*DEER.F	S105	UNI:Q9D8T7	468395	468395	371733	406635	566473	528740	612089	471079	623342	701984	651952	0.765241	0.0246184	468.532	0.799384	23.1	14.6862	0.862406	3	0		110816418	SRA stem-loop-interacting RNA-binding protein, mitochondrial precursor	Q9D8T7	SLIRP_MOUSE		387847	0.799384	F	23.1	nucleus	regulation of transcription	nucleotide binding
1959501	Rapamycin-insensitive companion of mTOR	Manual Assigned Name:Rapamycin-insensitive companion of mTOR HPRD>10682_1>S1591>Rictor SwissPROT>RICTR_MOUSE>S1439>Isoform 2 of Rapamycin-insensitive companion of mTOR OS=Mus musculus GN=Rictor IPI>Q6QI06>S1591>Rapamycin-insensitive companion of mTOR IPI>Q6QI06-2>S1591>Isoform 2 of Rapamycin-insensitive companion of mTOR IPI>IPI00399440.2>S1591>Rictor Isoform 1 of Rapamycin-insensitive companion …	K.S*TELLLGVK.T	S1591	UNI:Q6QI06	1.63599e+06	1.63599e+06	2452082	2574090	1133354	384448	2.121e+06	3150108	3437315	1468884	427682	0.771332	0.0246184	524.283	0.0935509	34.04	13.9794	0.773502	2	0		341941975	RecName: Full=Rapamycin-insensitive companion of mTOR; AltName: Full=AVO3 homolog; Short=mAVO3; AltName: Full=Protein pianissimo	Q6QI06	RICTR_MOUSE	10682_1	381260	0.0935509	F	34.04	intracellular	multicellular organismal development	binding protein binding	mTOR signaling pathway
1960043	Bcl-2-associated transcription factor 1	Manual Assigned Name:Bcl-2-associated transcription factor 1 SwissPROT>BCLF1_MOUSE>S654>Isoform 3 of Bcl-2-associated transcription factor 1 OS=Mus musculus GN=Bclaf1 SwissPROT>Q3UR37_MOUSE>S654>Putative uncharacterized protein (Fragment) OS=Mus musculus GN=Bclaf1 IPI>Q8K019>S656>Bcl-2-associated transcription factor 1 IPI>Q8K019-2>S656>Isoform 2 of Bcl-2-associated transcription factor 1 IPI>Q8K…	R.RIDIS*PSALR.K	S656*	UNI:Q8K019	2.79197e+06	2.79197e+06	1891735	1749041	874104	6653017	3.60575e+06	1994763	2637442	1028426	8762355	0.774312	0.0396527	604.313	0.205363	20.08	27.6809	0.687964	2	0		47605501	Bcl-2-associated transcription factor 1 (Btf) [MASS=106001]	Q8K019	Q3UR37_MOUSE		379214	0.205363	F	20.08	nucleus membrane integral to membrane	regulation of transcription negative regulation of transcription	protein binding
1959423	Ankyrin repeat domain-containing protein 57	Manual Assigned Name:Ankyrin repeat domain-containing protein 57 SwissPROT>ANR57_MOUSE>S205>Ankyrin repeat domain-containing protein 57 OS=Mus musculus GN=Ankrd57 IPI>Q8C0J6>S205>Ankyrin repeat domain-containing protein 57 IPI>IPI00223838.2>S205>Ankrd57 Ankyrin repeat domain-containing protein 57 NCBI>125987710>S205>Ankyrin repeat domain-containing protein 57 [MASS=54938] NCBI>187173282>S205>anky…	R.DLVLGSS*PQLK.R	S205	UNI:Q8C0J6	2.83855e+06	2.83855e+06	2669569	4311159	2919448	1454008	3.65337e+06	4600133	4906625	3040106	2066599	0.776967	0.0497443	618.816	0.532094	27.47	27.6042	0.753417	2	0		125987710	Ankyrin repeat domain-containing protein 57 [MASS=54938]	Q8C0J6	ANR57_MOUSE		394572	0.532094	F	27.47
1959375	Kif13b kinesin family member 13B	Manual Assigned Name:Kif13b kinesin family member 13B SwissPROT>Q6A029_MOUSE>MKIAA0639 protein (Fragment) OS=Mus musculus GN=Kif13b IPI>IPI00761751.2>Kif13b kinesin family member 13B IPI>E9Q4K7>Uncharacterized protein NCBI>148704095>mCG2476 [Mus musculus] [MASS=212836] NCBI>124487163>kinesin family member 13B [Mus musculus] [MASS=204574] NCBI>50510563>mKIAA0639 protein [Mus musculus] [MASS=87633]	R.WES*QQDVSQTLVSR.G	S1409	UNI:IPI00761751.2	6.14675e+06	6.14675e+06	6473896	9648498	6292197	2172423	7.83548e+06	8289104	11386400	7941785	3724629	0.784477	0.0335436	876.896	0.820409	94.75	97.5219	0.982451	2	0		148704095	mCG2476 [Mus musculus] [MASS=212836]	IPI00761751.2	Q6A029_MOUSE		377998	0.329761	F	94.75	cytoplasm	steroid metabolic process	protein binding
1959325	BCL2/adenovirus E1B 19 kDa protein-interacting protein 3	Manual Assigned Name:BCL2/adenovirus E1B 19 kDa protein-interacting protein 3 SwissPROT>BNIP3_MOUSE>S88>BCL2/adenovirus E1B 19 kDa protein-interacting protein 3 OS=Mus musculus GN=Bnip3 IPI>O55003>S88>BCL2/adenovirus E1B 19 kDa protein-interacting protein 3 IPI>IPI00115040.1>S88>Bnip3 BCL2/adenovirus E1B 19 kDa protein-interacting protein 3 IPI>IPI00850545.1>S88>Gm16439 similar to E1B 19K/Bcl-2-b…	K.NSTLS*EEDYIER.R	S88	UNI:O55003	1.37334e+07	1.37334e+07	7002082	17499972	11161269	19270412	1.74983e+07	9992965	26527333	14074977	19397868	0.784845	0.0417369	773.32	0.725916	89.84	38.1697	0.982023	2	0		6093508	BCL2/adenovirus E1B 19-kDa protein-interacting protein 3	O55003	BNIP3_MOUSE		376404	0.21868	F	89.84	integral to membrane	apoptosis response to hypoxia	protein homodimerization activity
1960449	RNA-binding protein 14	Manual Assigned Name:RNA-binding protein 14 HPRD>11485_1>T206>RNA binding motif protein 14 SwissPROT>Q62019_MOUSE>T205>16 kDa protein OS=Mus musculus GN=Rbm14 SwissPROT>RBM14_MOUSE>T206>Isoform 2 of RNA-binding protein 14 OS=Mus musculus GN=Rbm14 IPI>Q8C2Q3>T206>RNA-binding protein 14 IPI>Q8C2Q3-2>T206>Isoform 2 of RNA-binding protein 14 IPI>IPI00404707.1>T206>Rbm14 Isoform 1 of RNA-binding prote…	R.QPT*PPFFGR.D	T206*	UNI:Q8C2Q3	1.94047e+07	1.94047e+07	22561635	21887040	21118877	12051268	2.45389e+07	25822150	29456523	22252293	20624728	0.790772	0.0490369	568.762	0.212931	25.32	100	0.841218	2	0		73621447	RNA-binding protein 14 (RNA-binding motif protein 14)	Q8C2Q3	RBM14_MOUSE	11485_1	370479	0.212931	F	25.32	nucleus intracellular transcription factor complex	regulation of transcription oxidation reduction positive regulation of transcription from RNA polymerase II promoter	nucleotide binding
1959010	Translocation protein SEC62	Manual Assigned Name:Translocation protein SEC62 SwissPROT>SEC62_MOUSE>T375>Translocation protein SEC62 OS=Mus musculus GN=Sec62 IPI>Q8BU14>T375>Translocation protein SEC62 IPI>IPI00134398.6>T375>Sec62 Translocation protein SEC62 NCBI>81875212>T375>Translocation protein SEC62 (Translocation protein 1) (TP-1) NCBI>45595691>T375>Translocation protein 1 [Mus musculus] [MASS=45614] NCBI>148703024>T37…	K.EELEQQT*DGDCDEEDDDKDGEVPK.S	T375	UNI:Q8BU14	6.91385e+06	6.91385e+06	2012751	7337709	6888738	11416194	8.70432e+06	2615118	10239938	8324311	13637926	0.7943	0.0230352	964.367	1.33237	51.78	100	0.932194	3	0		81875212	Translocation protein SEC62 (Translocation protein 1) (TP-1)	Q8BU14	SEC62_MOUSE		374856	0.447236	F	51.78	integral to membrane	transport	protein transporter activity	Protein export
1960160	Polymerase I and transcript release factor	Manual Assigned Name:Polymerase I and transcript release factor SwissPROT>PTRF_MOUSE>T373S389S391>Polymerase I and transcript release factor OS=Mus musculus GN=Ptrf IPI>O54724>T373S389S391>Polymerase I and transcript release factor IPI>IPI00117689.1>T373S389S391>Ptrf Polymerase I and transcript release factor NCBI>56749456>T373S389S391>Polymerase I and transcript release factor [MASS=43953] NCBI>…	R.GSSPDVHT*LLEITEESDAVLVDKS*DS*D.-	T373S389S391*	UNI:O54724	4.2987e+06	4.2987e+06	1449593	6324043	5122472		5.40985e+06	1789344	7015904	7424317		0.794606	0.0494456	1033.42	0.241427	21	16.3481	0.862111	3	0		56749456	Polymerase I and transcript release factor [MASS=43953]	O54724	PTRF_MOUSE		382871	0.241427	F	21	nucleus	regulation of transcription	protein binding
1958646	Polymerase I and transcript release factor	Manual Assigned Name:Polymerase I and transcript release factor SwissPROT>PTRF_MOUSE>T198S204>Polymerase I and transcript release factor OS=Mus musculus GN=Ptrf IPI>O54724>T198S204>Polymerase I and transcript release factor IPI>IPI00117689.1>T198S204>Ptrf Polymerase I and transcript release factor NCBI>56749456>T198S204>Polymerase I and transcript release factor [MASS=43953] NCBI>18140061>T198S20…	K.EGDELGEGERPEDDT*AAIELS*SDEAVEVEEVIEESR.A	T198S204*	UNI:O54724	3.40605e+07	3.40605e+07	27121386	70113016	38667874	339764	4.28185e+07	32795477	91339847	46767094	371401	0.795463	0.0254872	1371.57	1.2544	47.36	46.0339	0.756408	3	0		56749456	Polymerase I and transcript release factor [MASS=43953]	O54724	PTRF_MOUSE		382871	0.00923967	F	47.36	nucleus	regulation of transcription	protein binding
1959495	Cation-independent mannose-6-phosphate receptor	Manual Assigned Name:Cation-independent mannose-6-phosphate receptor SwissPROT>MPRI_MOUSE>S2401>Cation-independent mannose-6-phosphate receptor OS=Mus musculus GN=Igf2r IPI>Q07113>S2401>Cation-independent mannose-6-phosphate receptor IPI>IPI00308971.1>S2401>Igf2r Cation-independent mannose-6-phosphate receptor NCBI>1709091>S2401>Cation-independent mannose-6-phosphate receptor precursor (CI Man-6-…	K.AEALSSLHGDDQDS*EDEVLTVPEVK.V	S2401	UNI:Q07113	1.70358e+07	1.70358e+07	15374960	30037869	13050967	9679578	2.13555e+07	17864566	39214213	14971320	13372070	0.797725	0.0264414	921.746	0.0481322	23.9	28.136	0.681504	3	0		1709091	Cation-independent mannose-6-phosphate receptor precursor (CI Man-6-P receptor) (CI-MPR) (Insulin-like growth factor II receptor) (300 kDa mannose 6-phosphate receptor) (MPR 300) (MPR300)	Q07113	MPRI_MOUSE		373169	0.0481322	F	23.9	integral to membrane	transport	protein binding	Lysosome
1960092	Protein FAM73B	Manual Assigned Name:Protein FAM73B HPRD>12965_1>S276>C9orf54 protein SwissPROT>FA73B_MOUSE>S276>Isoform 2 of Protein FAM73B OS=Mus musculus GN=Fam73b IPI>Q8BK03>S276>Protein FAM73B IPI>Q8BK03-2>S276>Isoform 2 of Protein FAM73B IPI>IPI00222443.1>S276>Fam73b Isoform 1 of Protein FAM73B IPI>IPI00652506.1>S276>Fam73b Isoform 2 of Protein FAM73B NCBI>81896427>S276>Protein FAM73B NCBI>74178322>S343>un…	R.TLMLPLTEGS*LR.L	S276	UNI:Q8BK03	6.98284e+06	6.98284e+06	4755868	8767634	7425004		8.70969e+06	6303591	11355193	8470294		0.801732	0.0345487	710.862	1.9272	26.25	9.12045	0.68666	2	0		81896427	Protein FAM73B	Q8BK03	FA73B_MOUSE	12965_1	388009	1.9272	F	26.25	integral to membrane	multicellular organismal development oxidation reduction	protein binding
1959517	Kif13b kinesin family member 13B	Manual Assigned Name:Kif13b kinesin family member 13B SwissPROT>Q6A029_MOUSE>MKIAA0639 protein (Fragment) OS=Mus musculus GN=Kif13b IPI>IPI00761751.2>Kif13b kinesin family member 13B IPI>E9Q4K7>Uncharacterized protein NCBI>148704095>mCG2476 [Mus musculus] [MASS=212836] NCBI>124487163>kinesin family member 13B [Mus musculus] [MASS=204574] NCBI>50510563>mKIAA0639 protein [Mus musculus] [MASS=87633]	R.APLLSEPASAVPT*SPFR.I	T1653	UNI:IPI00761751.2	3.64925e+06	3.64925e+06	4696042	5660572	2793601	1446775	4.55157e+06	6388380	6481572	3378188	1958143	0.801756	0.0246184	910.454	1.2737	45.75	57.227	0.790522	2	0		148704095	mCG2476 [Mus musculus] [MASS=212836]	IPI00761751.2	Q6A029_MOUSE		377998	0.198912	F	45.75	cytoplasm	steroid metabolic process	protein binding
1959848	Kif13b kinesin family member 13B	Manual Assigned Name:Kif13b kinesin family member 13B SwissPROT>Q6A029_MOUSE>MKIAA0639 protein (Fragment) OS=Mus musculus GN=Kif13b IPI>IPI00761751.2>Kif13b kinesin family member 13B IPI>E9Q4K7>Uncharacterized protein NCBI>148704095>mCG2476 [Mus musculus] [MASS=212836] NCBI>124487163>kinesin family member 13B [Mus musculus] [MASS=204574] NCBI>50510563>mKIAA0639 protein [Mus musculus] [MASS=87633]	R.APLLSEPASAVPTS*PFR.I	S1654	UNI:IPI00761751.2	3.64925e+06	3.64925e+06	4696042	5660572	2793601	1446775	4.55157e+06	6388380	6481572	3378188	1958143	0.801756	0.0246184	910.455	1.74625	55.91	20.096	0.790141	2	0		148704095	mCG2476 [Mus musculus] [MASS=212836]	IPI00761751.2	Q6A029_MOUSE		377998	1.74625	F	55.91	cytoplasm	steroid metabolic process	protein binding
1960364	Glycogen [starch] synthase, muscle	Manual Assigned Name:Glycogen [starch] synthase, muscle HPRD>00721_1>S641S649>Glycogen synthase 1 SwissPROT>D3Z0Q6_MOUSE>S577S585>Uncharacterized protein OS=Mus musculus GN=Gys1 SwissPROT>GYS1_MOUSE>S641S649>"Glycogen [starch] synthase, muscle OS=Mus musculus GN=Gys1" SwissPROT>GYS3_MOUSE>S640S648>Glycogen [starch] synthase, brain (EC 2.4.1.11) IPI>Q9Z1E4>S641S649>Glycogen [starch] synthase, musc…	R.YPRPAS*VPPSPSLS*R.H	S641S649*	UNI:Q9Z1E4	1.40486e+07	1.40486e+07	5763796	15240579	17687141	17502953	1.74999e+07	7883949	21414953	19222492	21478142	0.802783	0.0305145	597.61	0.534952	28.58	8.36859	0.442444	3	0		218512063	RecName: Full=Glycogen [starch] synthase, muscle	Q9Z1E4	GYS3_MOUSE	00721_1	370159	0.534952	F	28.58	cytoplasm ribonucleoprotein complex	heart development glycogen biosynthetic process	protein binding glycogen (starch) synthase activity	Starch and sucrose metabolism Insulin signaling pathway
1960307	ATP citrate lyase	Manual Assigned Name:ATP citrate lyase HPRD>00155_1>S481>ATP citrate lyase SwissPROT>Q3TS02_MOUSE>S481>ATP citrate lyase OS=Mus musculus GN=Acly SwissPROT>Q3V117_MOUSE>S481>ATP citrate lyase OS=Mus musculus GN=Acly IPI>Q3TS02>S481>ATP citrate lyase IPI>Q3V117>S481>ATP citrate lyase IPI>IPI00126248.3>S481>Acly Putative uncharacterized protein IPI>IPI00830265.1>S481>Acly Putative uncharacterized pr…	K.AKPAMPQDSVPS*PR.S	S481*	UNI:Q3TS02	7.8695e+06	7.8695e+06	9875047	8724464	7991832	4886639	9.7976e+06	12627454	11563522	9924361	5075077	0.803206	0.0333459	526.92	0.558671	20.5	33.44	0.645254	3	0		123231522	ATP citrate lyase [Mus musculus] [MASS=53705]	Q3TS02	Q3V117_MOUSE	00155_1		0.558671	F	20.5	cytoplasm intracellular	metabolic process acetyl-CoA biosynthetic process	ATP binding protein binding	Citrate cycle (TCA cycle) Reductive carboxylate cycle (CO2 fixation)
1960328	Epidermal growth factor receptor substrate 15-like 1	Manual Assigned Name:Epidermal growth factor receptor substrate 15-like 1 HPRD>09445_1>S255>EPS15R SwissPROT>EP15R_MOUSE>S255>Isoform 4 of Epidermal growth factor receptor substrate 15-like 1 OS=Mus musculus GN=Eps15l1 SwissPROT>Q3UIS9_MOUSE>S255>Epidermal growth factor receptor pathway substrate 15-like 1 OS=Mus musculus GN=Eps15l1 IPI>Q60902>S255>Epidermal growth factor receptor substrate 15-li…	R.STPSHGSVSSLNSTGSLS*PK.H	S255*	UNI:Q60902	1.53804e+06	1.53804e+06	849754	1740586	1525098	2036707	1.90471e+06	1336303	2032405	1814984	2435138	0.807492	0.0351131	673.315	0.377614	27.99	13.0998	0.343258	3	0		341941109	RecName: Full=Epidermal growth factor receptor substrate 15-like 1; AltName: Full=Epidermal growth factor receptor pathway substrate 15-related sequence; Short=Eps15-rs; AltName: Full=Eps15-related protein; Short=Eps15R	Q60902	Q3UIS9_MOUSE	09445_1	370451	0.377614	F	27.99	nucleus integral to membrane myofibril transcription factor TFIIE complex mitochondrion	endocytosis proteasomal ubiquitin-dependent protein catabolic process intracellular protein transport muscle contraction transcription initiation from RNA polymerase II promoter oxidation reduction	protein binding calcium ion binding receptor activity
1958756	RNA polymerase-associated protein CTR9 homolog	Manual Assigned Name:RNA polymerase-associated protein CTR9 homolog SwissPROT>CTR9_MOUSE>S925>Isoform 3 of RNA polymerase-associated protein CTR9 homolog OS=Mus musculus GN=Ctr9 IPI>Q62018>S970>RNA polymerase-associated protein CTR9 homolog IPI>Q62018-3>S970>Isoform 3 of RNA polymerase-associated protein CTR9 homolog IPI>IPI00120919.4>S970>Ctr9 Isoform 1 of RNA polymerase-associated protein CTR9 …	K.GEEGS*EEEETENGPKPK.K	S970*	UNI:Q62018	579269	579269	363613	806013	978078	169371	714104	397824	938959	1292558	227077	0.811182	0.0297096	647.936	0.0829131	25.51	18.3555	0.837781	3	0		91208163	RNA polymerase-associated protein CTR9 homolog (SH2 domain-binding protein 1) (Tetratricopeptide repeat-containing, SH2-binding phosphoprotein of 150 kDa) (TPR-containing, SH2-binding phosphoprotein of 150 kDa) (p150TSP)	Q62018	CTR9_MOUSE		370357	0.0829131	F	25.51	nucleus	histone H2B ubiquitination	protein binding
1960190	RNA polymerase-associated protein CTR9 homolog	Manual Assigned Name:RNA polymerase-associated protein CTR9 homolog SwissPROT>CTR9_MOUSE>T930>Isoform 3 of RNA polymerase-associated protein CTR9 homolog OS=Mus musculus GN=Ctr9 IPI>Q62018>T975>RNA polymerase-associated protein CTR9 homolog IPI>Q62018-3>T975>Isoform 3 of RNA polymerase-associated protein CTR9 homolog IPI>IPI00120919.4>T975>Ctr9 Isoform 1 of RNA polymerase-associated protein CTR9 …	K.GEEGSEEEET*ENGPKPK.K	T975*	UNI:Q62018	579269	579269	363613	806013	978078	169371	714104	397824	938959	1292558	227077	0.811182	0.0297096	647.936	0.297148	23.85	14.2397	0.786978	3	0		91208163	RNA polymerase-associated protein CTR9 homolog (SH2 domain-binding protein 1) (Tetratricopeptide repeat-containing, SH2-binding phosphoprotein of 150 kDa) (TPR-containing, SH2-binding phosphoprotein of 150 kDa) (p150TSP)	Q62018	CTR9_MOUSE		370357	0.297148	F	23.85	nucleus	histone H2B ubiquitination	protein binding
1959992	Ahnak AHNAK nucleoprotein isoform 1	Manual Assigned Name:Ahnak AHNAK nucleoprotein isoform 1 IPI>IPI00553798.2>Ahnak AHNAK nucleoprotein isoform 1 IPI>E9Q616>Uncharacterized protein IPI>F7BRM2>Uncharacterized protein (Fragment) NCBI>37675525>AHNAK [Mus musculus] [MASS=224129] NCBI>118600845>Ahnak protein [Mus musculus] [MASS=164562] NCBI>18204820>AA589382 protein [Mus musculus] NCBI>74197955>unnamed protein product [Mus musculus] […	K.FKAEAPLPS*PK.L	S4890	UNI:IPI00553798.2	2.31452e+06	2.31452e+06	2377035	2736062	1720315	2424676	2.85032e+06	3426606	3151850	1874748	2948086	0.812021	0.0362397	427.559	0.103853	20.79	100	0.271835	3	0		37675525	AHNAK [Mus musculus] [MASS=224129]	IPI00553798.2			391797	0.103853	F	20.79	nucleus	nervous system development	protein binding
1959470	Nuclear factor 1	Manual Assigned Name:Nuclear factor 1 SwissPROT>B1AUB9_MOUSE>S278>Nuclear factor 1 OS=Mus musculus GN=Nfia SwissPROT>B1AUC0_MOUSE>S300>Nuclear factor 1 OS=Mus musculus GN=Nfia SwissPROT>NFIA_MOUSE>S300>Isoform 7 of Nuclear factor 1 A-type OS=Mus musculus GN=Nfia IPI>B1AUB9>S278>Nuclear factor 1 IPI>B1AUC0>S278>Nuclear factor 1 IPI>E9Q7H3>S278>Nuclear factor 1 IPI>Q02780>S278>Nuclear factor 1 A-ty…	R.S*PGSGSQSSGWHEVEPGLPSPSTLK.K	S278*	UNI:B1AUB9	1.11741e+07	1.11741e+07	6897911	16438091	14891947	6468358	1.35131e+07	9253878	17263744	19005364	8529308	0.826909	0.031747	866.066	0.696407	50.66	24.3319	0.63001	3	0		14194972	Nuclear factor 1 A-type (Nuclear factor 1/A) (NF1-A) (NFI-A) (NF-I/A) (CCAAT-box binding transcription factor) (CTF) (TGGCA-binding protein)	B1AUB9	NFIA_MOUSE		387260	0.696407	F	50.66	nucleus	regulation of transcription, DNA-dependent	protein binding
1959834	Nuclear factor 1	Manual Assigned Name:Nuclear factor 1 SwissPROT>B1AUB9_MOUSE>S285>Nuclear factor 1 OS=Mus musculus GN=Nfia SwissPROT>B1AUC0_MOUSE>S307>Nuclear factor 1 OS=Mus musculus GN=Nfia SwissPROT>NFIA_MOUSE>S307>Isoform 7 of Nuclear factor 1 A-type OS=Mus musculus GN=Nfia IPI>B1AUB9>S285>Nuclear factor 1 IPI>B1AUC0>S285>Nuclear factor 1 IPI>E9Q7H3>S285>Nuclear factor 1 IPI>Q02780>S285>Nuclear factor 1 A-ty…	R.SPGSGSQS*SGWHEVEPGLPSPSTLK.K	S285*	UNI:B1AUB9	1.11741e+07	1.11741e+07	6897911	16438091	14891947	6468358	1.35131e+07	9253878	17263744	19005364	8529308	0.826909	0.031747	866.065	0.219939	25.46	3.52183	0.54841	3	0		14194972	Nuclear factor 1 A-type (Nuclear factor 1/A) (NF1-A) (NFI-A) (NF-I/A) (CCAAT-box binding transcription factor) (CTF) (TGGCA-binding protein)	B1AUB9	NFIA_MOUSE		387260	0.219939	F	25.46	nucleus	regulation of transcription, DNA-dependent	protein binding
1959124	cAMP-dependent protein kinase type II-beta regulatory subunit	Manual Assigned Name:cAMP-dependent protein kinase type II-beta regulatory subunit HPRD>01486_1>S114>Protein kinase, cAMP dependent, regulatory, type II, beta SwissPROT>KAP3_MOUSE>S112>cAMP-dependent protein kinase type II-beta regulatory subunit OS=Mus musculus GN=Prkar2b IPI>P31324>S112>cAMP-dependent protein kinase type II-beta regulatory subunit IPI>IPI00224570.3>S112>Prkar2b cAMP-dependent p…	R.RAS*VCAEAYNPDEEEDDAESR.I	S112*	UNI:P31324	3.07992e+06	3.07992e+06	2680971	4630858	3818018	1189830	3.6946e+06	2899871	5056857	5267677	1553998	0.833627	0.0388827	623.994	0.825527	27.68	13.0015	0.912717	4	0		54041237	cAMP-dependent protein kinase type II-beta regulatory subunit	P31324	KAP3_MOUSE	01486_1	370027	0.825527	F	27.68	cytoplasm cytosol cAMP-dependent protein kinase complex	signal transduction protein amino acid phosphorylation	nucleotide binding	Insulin signaling pathway Apoptosis
1959474	Ehd2 protein	Manual Assigned Name:Ehd2 protein SwissPROT>EHD2_MOUSE>S438>EH domain-containing protein 2 OS=Mus musculus GN=Ehd2 IPI>Q8R2X0>S338>Ehd2 protein IPI>Q8BH64>S338>EH domain-containing protein 2 IPI>IPI00402968.1>S338>Ehd2 EH domain-containing protein 2 NCBI>81913131>S438>EH domain-containing protein 2 NCBI>109730281>S438>EH-domain containing 2 [Mus musculus] NCBI>44893879>S438>EH-domain protein 2 [M…	R.GPDEAIEDGEEGS*EDDAEWVVTK.D	S338*	UNI:Q8R2X0	1.04675e+08	1.04675e+08	52353345	176650169	122891485	66804992	1.25064e+08	60262090	217636181	153562658	68796953	0.836968	0.0346121	1279.01	1.80601	63.45	63.3485	0.899739	2	0		81913131	EH domain-containing protein 2	Q8R2X0	EHD2_MOUSE			0.102463	F	63.45	membrane	endocytosis	protein binding	Endocytosis
1959105	Sec1 family domain-containing protein 1	Manual Assigned Name:Sec1 family domain-containing protein 1 SwissPROT>SCFD1_MOUSE>S300>Isoform 3 of Sec1 family domain-containing protein 1 OS=Mus musculus GN=Scfd1 IPI>Q8BRF7>S300>Sec1 family domain-containing protein 1 IPI>Q8BRF7-2>S300>Isoform 2 of Sec1 family domain-containing protein 1 IPI>Q8BRF7-3>S300>Isoform 3 of Sec1 family domain-containing protein 1 IPI>IPI00224219.1>S300>Scfd1 Isofor…	R.VNLEESTGVENS*PAGARPK.R	S300*	UNI:Q8BRF7	5.65264e+06	5.65264e+06	6591897	6424327	5436426	4157924	6.71762e+06	7595008	8104644	5677536	5493303	0.841465	0.0351547	684.996	0.39796	24.68	17.6534	0.431952	3	0		51316833	Sec1 family domain containing protein 1 (Syntaxin binding protein 1-like 2)	Q8BRF7	SCFD1_MOUSE		372116	0.39796	F	24.68	membrane	transport	protein binding
1959486	Kinesin light chain 4	Manual Assigned Name:Kinesin light chain 4 SwissPROT>KLC4_MOUSE>S590>Kinesin light chain 4 OS=Mus musculus GN=Klc4 SwissPROT>KLC8_MOUSE>S590>Kinesin-like protein 8 IPI>Q9DBS5>S590>Kinesin light chain 4 IPI>IPI00120089.1>S590>Klc4 Kinesin light chain 4 NCBI>13878552>S590>Probable kinesin light chain 3 (KLC 3) NCBI>74218114>S590>unnamed protein product [Mus musculus] [MASS=68612] NCBI>12836206>S590…	R.AAS*LNYLNQPNAAPLQVSR.G	S590	UNI:Q9DBS5	9.08544e+06	9.08544e+06	3939518	16790453	8071906	7539879	1.07557e+07	5150160	19448918	10933369	7490491	0.844707	0.0453079	706.353	1.12799	22.08	6.57577	0.922613	3	0		13878552	Probable kinesin light chain 3 (KLC 3)	Q9DBS5	KLC8_MOUSE		370111	1.12799	F	22.08	microtubule	intraflagellar transport	protein binding
1958708	Eukaryotic translation initiation factor 4E-binding protein 1	Manual Assigned Name:Eukaryotic translation initiation factor 4E-binding protein 1 SwissPROT>4EBP1_MOUSE>S64T69>Eukaryotic translation initiation factor 4E-binding protein 1 OS=Mus musculus GN=Eif4ebp1 IPI>Q60876>S64T69>Eukaryotic translation initiation factor 4E-binding protein 1 IPI>IPI00318938.6>S64T69>Eif4ebp1 Eukaryotic translation initiation factor 4E-binding protein 1 NCBI>34921544>S64T69>…	R.NS*PVAKT*PPK.D	S64T69	UNI:Q60876	1.2927e+06	1.2927e+06	814613	1273993	2394807	687367	1.51772e+06	993820	1656391	2640725	779960	0.851733	0.026975	607.781	0.429787	23.4	100	0.588227	2	0		34921544	Eukaryotic translation initiation factor 4E binding protein 1 (4E-BP1) (eIF4E-binding protein 1) (Phosphorylated heat- and acid-stable protein regulated by insulin 1) (PHAS-I)	Q60876	4EBP1_MOUSE		376603	0.171256	F	23.4	nucleus	regulation of translation	protein binding	Insulin signaling pathway ErbB signaling pathway mTOR signaling pathway Acute myeloid leukemia
1959301	Regulatory-associated protein of mTOR	Manual Assigned Name:Regulatory-associated protein of mTOR SwissPROT>A2ACM0_MOUSE>S859S863>Novel protein containing six WD40 domains at C-terminus OS=Mus musculus GN=Rptor IPI>Q8K4Q0>S859S863>Regulatory-associated protein of mTOR IPI>A2ACM0>S859S863>Novel protein containing six WD40 domains at C-terminus IPI>IPI00411051.4>S859S863>Rptor regulatory-associated protein of mTOR IPI>IPI00170249.1>S859…	R.ILDTSSLTQS*APAS*PTNK.G	S859S863	UNI:Q8K4Q0	4.30426e+06	4.30426e+06	3666625	4753870	4562101	4234432	5.02402e+06	3723395	5766849	5653091	4952745	0.856736	0.0366099	999.949	0.0710394	43.5	18.2282	0.82523	2	0		46577497	Regulatory associated protein of mTOR (Raptor) (P150 target of rapamycin (TOR)-scaffold protein)	Q8K4Q0	A2ACM0_MOUSE		373935	0.0710394	F	43.5	TORC1 complex	regulation of cell size	protein binding	Insulin signaling pathway mTOR signaling pathway
1958758	Myristoylated alanine-rich C-kinase substrate	Manual Assigned Name:Myristoylated alanine-rich C-kinase substrate SwissPROT>MARCS_MOUSE>T143>Myristoylated alanine-rich C-kinase substrate OS=Mus musculus GN=Marcks IPI>P26645>T143>Myristoylated alanine-rich C-kinase substrate IPI>IPI00229534.5>T143>Marcks Myristoylated alanine-rich C-kinase substrate NCBI>126752>T143>Myristoylated alanine-rich C-kinase substrate (MARCKS) NCBI>116283897>T143>Mar…	K.AEDGAAPSPSSET*PK.K	T143*	UNI:P26645	1.62717e+06	1.62717e+06	1374239	1447433	1552721	2134291	1.8959e+06	1886583	1665790	1615445	2415786	0.858257	0.0435299	766.323	0.477919	45.84	13.4324	0.654704	2	0		126752	Myristoylated alanine-rich C-kinase substrate (MARCKS)	P26645	MARCS_MOUSE		394614	0.158001	F	45.84	membrane	protein amino acid phosphorylation	actin binding	Fc gamma R-mediated phagocytosis
1959603	Myristoylated alanine-rich C-kinase substrate	Manual Assigned Name:Myristoylated alanine-rich C-kinase substrate SwissPROT>MARCS_MOUSE>S141>Myristoylated alanine-rich C-kinase substrate OS=Mus musculus GN=Marcks IPI>P26645>S141>Myristoylated alanine-rich C-kinase substrate IPI>IPI00229534.5>S141>Marcks Myristoylated alanine-rich C-kinase substrate NCBI>126752>S141>Myristoylated alanine-rich C-kinase substrate (MARCKS) NCBI>116283897>S141>Mar…	K.AEDGAAPSPSS*ETPK.K	S141*	UNI:P26645	1.62717e+06	1.62717e+06	1374239	1447433	1552721	2134291	1.8959e+06	1886583	1665790	1615445	2415786	0.858257	0.0435299	766.323	0.712962	40.54	6.76694	0.815745	2	0		126752	Myristoylated alanine-rich C-kinase substrate (MARCKS)	P26645	MARCS_MOUSE		394614	0.712962	F	40.54	membrane	protein amino acid phosphorylation	actin binding	Fc gamma R-mediated phagocytosis
1960272			K.KIS*IR.R	Phosphorylated on non-tryptic peptide, or a tryptic peptide with greater than 2 internal cleavage sites, preventing site localization. Also you may have selected the wrong species for this sample. You need to manually determine the site position		1.32052e+06	1.32052e+06	1938999	1358248	1044101	940752	1.52884e+06	2207371	1568579	1107863	1231557	0.863741	0.0345487	348.694	0.103392	20.1	100	0.166288	2	0								0.103392	F	20.1				Glycolysis / Gluconeogenesis Glycerolipid metabolism Glycerophospholipid metabolism Streptomycin biosynthesis Galactose metabolism Starch and sucrose metabolism Amino sugar and nucleotide sugar metabolism Tryptophan metabolism Arginine and proline metabolism Ubiquinone and other terpenoid-quinone biosynthesis Aminoacyl-tRNA biosynthesis Butirosin and neomycin biosynthesis Phosphatidylinositol sig…
1959250	SH3 domain-binding protein 5-like	Manual Assigned Name:SH3 domain-binding protein 5-like SwissPROT>3BP5L_MOUSE>S361>SH3 domain-binding protein 5-like OS=Mus musculus GN=Sh3bp5l SwissPROT>Q80TA2_MOUSE>S350>MKIAA1720 protein (Fragment) OS=Mus musculus GN=Sh3bp5l IPI>Q99LH9>S361>SH3 domain-binding protein 5-like IPI>IPI00116907.8>S361>Sh3bp5l SH3 domain-binding protein 5-like IPI>IPI00884468.1>S361>Sh3bp5l MKIAA1720 protein (Fragmen…	R.GLSDHAS*LDGQELGAQSR.G	S361	UNI:Q99LH9	7.89904e+06	7.89904e+06	4807707	8155058	8529308	10104075	9.11792e+06	6225811	10551630	9549752	10144476	0.86632	0.0449104	640.952	1.276	28.01	19.7008	0.75295	3	0		81880234	SH3 domain-binding protein 5-like	Q99LH9	Q80TA2_MOUSE		386565	1.276	F	28.01
1960304	Membrane-associated progesterone receptor component 2	Manual Assigned Name:Membrane-associated progesterone receptor component 2 SwissPROT>PGRC2_MOUSE>S202>Membrane-associated progesterone receptor component 2 OS=Mus musculus GN=Pgrmc2 IPI>Q80UU9>S202>Membrane-associated progesterone receptor component 2 IPI>IPI00351206.5>S202>Pgrmc2 Membrane-associated progesterone receptor component 2 NCBI>122065842>S202>Membrane-associated progesterone receptor c…	R.LLKPGEEPS*EYTDEEDTKDHSK.Q	S202*	UNI:Q80UU9	1.83745e+06	1.83745e+06	1342850	2192594	1351949	2462418	2.12005e+06	1658755	2789775	1645142	2386529	0.866703	0.0469902	884.399	0.00678942	26.2	10.9255	0.774886	3	0		122065842	Membrane-associated progesterone receptor component 2	Q80UU9	PGRC2_MOUSE		382466	0.00678942	F	26.2	integral to membrane	axon guidance metabolic process	protein binding
1959606	Calnexin	Manual Assigned Name:Calnexin SwissPROT>CALX_MOUSE>S553S563>Calnexin OS=Mus musculus GN=Canx IPI>P35564>S553S563>Calnexin IPI>IPI00119618.1>S553S563>Canx Calnexin NCBI>543921>S553S563>Calnexin precursor NCBI>148701758>S553S563>calnexin, isoform CRA_a [Mus musculus] [MASS=67277] NCBI>148701757>S553S563>calnexin, isoform CRA_a [Mus musculus] NCBI>148701756>S553S563>calnexin, isoform CRA_a [Mus musc…	K.QKS*DAEEDGVTGS*QDEEDSKPK.A	S553S563*	UNI:P35564	3.29285e+06	3.29285e+06	1161164	2670914	3125029	6214310	3.78042e+06	1335810	3519532	3400506	6865848	0.871028	0.0345487	855.01	1.37416	37.67	19.0666	0.667957	3	0		543921	Calnexin precursor	P35564	CALX_MOUSE		371849	1.37416	F	37.67	integral to membrane	protein folding	protein binding	Antigen processing and presentation
1958829	Protein Njmu-R1	Manual Assigned Name:Protein Njmu-R1 HPRD>11392_1>S18>Protein kinase Njmu-R1 SwissPROT>NJMU_MOUSE>S18>Protein Njmu-R1 OS=Mus musculus IPI>Q9CYI0>S18>Protein Njmu-R1 IPI>IPI00344786.4>S18>5730455P16Rik Protein Njmu-R1 NCBI>114152851>S18>Protein Njmu-R1 NCBI>56206112>S18>novel protein [Mus musculus] NCBI>32967651>S18>5730455P16Rik protein [Mus musculus] [MASS=44422] NCBI>148683688>S18>mCG19053 [Mus…	K.ELES*SEEGGSAEER.R	S18	UNI:Q9CYI0	300181	300181	264014	378333	494523	63854	343351	335470	402118	562070	73746	0.874269	0.0313815	794.804	0.372655	83.67	19.0849	0.945276	2	0		114152851	Protein Njmu-R1	Q9CYI0	NJMU_MOUSE	11392_1	386755	0.139746	F	83.67	cellular_component	spermatogenesis	molecular_function
1959035	Tyrosine-protein phosphatase non-receptor type 14	Manual Assigned Name:Tyrosine-protein phosphatase non-receptor type 14 HPRD>04402_1>S314>Protein tyrosine phosphatase, non receptor, type 14 SwissPROT>PTN14_MOUSE>S314>Tyrosine-protein phosphatase non-receptor type 14 OS=Mus musculus GN=Ptpn14 IPI>Q62130>S314>Tyrosine-protein phosphatase non-receptor type 14 IPI>IPI00122168.3>S314>Ptpn14 Tyrosine-protein phosphatase non-receptor type 14 NCBI>2493…	K.ICTEQSNS*PPPIR.R	S314	UNI:Q62130	1.67431e+06	1.67431e+06	1386680	1903903	2205273	1201377	1.9077e+06	1582431	2371309	2348698	1328344	0.87766	0.0314417	794.856	0.592936	58.68	42.4279	0.944162	2	0		2493259	Protein tyrosine phosphatase, non-receptor type 14 (Protein-tyrosine phosphatase PTP36)	Q62130	PTN14_MOUSE	04402_1	374357	0.284508	F	58.68	cytoplasm	protein amino acid dephosphorylation	binding
1958772	Calnexin	Manual Assigned Name:Calnexin SwissPROT>CALX_MOUSE>S553>Calnexin OS=Mus musculus GN=Canx IPI>P35564>S553>Calnexin IPI>IPI00119618.1>S553>Canx Calnexin NCBI>543921>S553>Calnexin precursor NCBI>148701758>S553>calnexin, isoform CRA_a [Mus musculus] [MASS=67277] NCBI>148701757>S553>calnexin, isoform CRA_a [Mus musculus] NCBI>148701756>S553>calnexin, isoform CRA_a [Mus musculus] NCBI>56206506>S553>cal…	K.QKS*DAEEDGVTGSQDEEDSKPK.A	S553*	UNI:P35564	1.39251e+06	1.39251e+06	738621	717497	730670	3383232	1.58366e+06	827633	1033066	1017598	3456339	0.879296	0.0463486	621.518	1.29438	23.23	30.5962	0.751444	4	0		543921	Calnexin precursor	P35564	CALX_MOUSE		371849	1.29438	F	23.23	integral to membrane	protein folding	protein binding	Antigen processing and presentation
1960423	Trans-Golgi network integral membrane protein 1	Manual Assigned Name:Trans-Golgi network integral membrane protein 1 SwissPROT>TGON1_MOUSE>S210>Trans-Golgi network integral membrane protein 1 OS=Mus musculus GN=Tgoln1 SwissPROT>TGON2_MOUSE>S220>Trans-Golgi network integral membrane protein 2 OS=Mus musculus GN=Tgoln2 IPI>Q62313>S210>Trans-Golgi network integral membrane protein 1 IPI>Q62314>S210>Trans-Golgi network integral membrane protein 2 …	K.TES*GETLAGDSDFSLKPEK.G	S210	UNI:Q62313	2.48586e+06	2.48586e+06	2095917	4024774	2766038	1056700	2.80645e+06	2133952	4290742	3505526	1295585	0.885765	0.0470415	1045.96	0.477302	26.5		0.369875	2	0		38372554	Trans-Golgi network integral membrane protein 2 precursor (TGN38B)	Q62313	TGON2_MOUSE		385289	0.477302	F	26.5	integral to membrane	peptide cross-linking	protein binding
1959709	Endoplasmin	Manual Assigned Name:Endoplasmin HPRD>01860_1>S306>Tumor rejection antigen 1 SwissPROT>ENPL_MOUSE>S306>Endoplasmin OS=Mus musculus GN=Hsp90b1 SwissPROT>Q3TUD6_MOUSE>S129>Putative uncharacterized protein OS=Mus musculus GN=Hsp90b1 IPI>P08113>S306>Endoplasmin IPI>IPI00129526.1>S306>Hsp90b1 Endoplasmin IPI>F7C312>S306>Uncharacterized protein (Fragment) IPI>IPI00830494.1>S306>Hsp90b1 43 kDa protein I…	K.EES*DDEAAVEEEEEEK.K	S306	UNI:P08113	580404	580404	478033	1017390	818236	7959	654696	378942	815399	769749		0.886524	0.0469534	973.848	0.689375	58.15	100	0.399103	2	0		119362	Endoplasmin precursor (Endoplasmic reticulum protein 99) (94 kDa glucose-regulated protein) (GRP94) (ERP99) (Polymorphic tumor rejection antigen 1) (Tumor rejection antigen gp96)	P08113	Q3TUD6_MOUSE	01860_1	371684	0.689375	F	58.15	endoplasmic reticulum peroxisome	protein folding protein transport	ATP binding protein binding	Pathways in cancer Plant-pathogen interaction Prostate cancer NOD-like receptor signaling pathway
1959598	Nuclear ubiquitous casein and cyclin-dependent kinases substrate	Manual Assigned Name:Nuclear ubiquitous casein and cyclin-dependent kinases substrate SwissPROT>NUCKS_MOUSE>S214>Nuclear ubiquitous casein and cyclin-dependent kinases substrate OS=Mus musculus GN=Nucks1 IPI>Q80XU3>S214>Nuclear ubiquitous casein and cyclin-dependent kinases substrate IPI>IPI00341869.5>S214>Nucks1 Nuclear ubiquitous casein and cyclin-dependent kinases substrate IPI>IPI00928108.1>S…	K.EEDEEAES*PPEK.K	S214*	UNI:Q80XU3	497755	497755	370350	586586	1026674	7408	558849	332479	474227	869841		0.890678	0.0326563	738.778	0.827605	46.83	100	0.93315	2	0		50400986	Nuclear ubiquitous casein and cyclin-dependent kinases substrate (JC7)	Q80XU3	NUCKS_MOUSE		383895	0.827605	F	46.83	nucleus	in utero embryonic development regulation of cell cycle	metal ion binding double-stranded DNA binding
1959548	Hormone-sensitive lipase	Manual Assigned Name:Hormone-sensitive lipase SwissPROT>LIPS_MOUSE>S557>Hormone-sensitive lipase OS=Mus musculus GN=Lipe SwissPROT>Q8CDI9_MOUSE>S600>Putative uncharacterized protein OS=Mus musculus GN=Lipe IPI>P54310>S557>Hormone-sensitive lipase IPI>IPI00469416.3>S557>Lipe Hormone-sensitive lipase IPI>IPI00228826.1>S557>Lipe lipase E isoform 1 IPI>E9Q4M2>S557>Uncharacterized protein IPI>Q8CDI9>S…	R.S*VSEAALAQPEGLLGTDTLK.K	S557*	UNI:P54310	1.42436e+08	1.42436e+08	136521675	175501742	176926416	80794535	1.58785e+08	142694538	205372152	204382161	82690189	0.897039	0.0434125	1040.52	0.874029	43.39	103.093	0.647838	2	0		85690846	Hormone-sensitive lipase (HSL)	P54310	Q8CDI9_MOUSE		370042	0.874029	F	43.39	nucleus cytosol	metabolic process	protein binding	Insulin signaling pathway
1958664	Enhancer of mRNA-decapping protein 4	Manual Assigned Name:Enhancer of mRNA-decapping protein 4 HPRD>06911_1>T727>Autoantigen RCD8 SwissPROT>D6RE33_MOUSE>T671>Uncharacterized protein OS=Mus musculus GN=Edc4 SwissPROT>EDC4_MOUSE>T731>Isoform 2 of Enhancer of mRNA-decapping protein 4 OS=Mus musculus GN=Edc4 IPI>Q3UJB9>T731>Enhancer of mRNA-decapping protein 4 IPI>Q3UJB9-2>T731>Isoform 2 of Enhancer of mRNA-decapping protein 4 IPI>IPI00…	R.T*RSPDVISSASTALSQDIPEIASEALSR.G	T731*	UNI:Q3UJB9	3.61781e+06	3.61781e+06	4022340	5077628	2300493	3070766	4.03299e+06	4612772	5216388	2487128	3815660	0.897054	0.0415967	1001.16	0.119608	25.99	6.77781	0.545562	3	0		145566774	Enhancer of mRNA-decapping protein 4 [MASS=152483]	Q3UJB9	EDC4_MOUSE	06911_1	378130	0.119608	F	25.99	nucleus	immune response biological_process transport	protein binding	RNA degradation
1960112	Phosphoglycerate kinase 1	Manual Assigned Name:Phosphoglycerate kinase 1 HPRD>02412_1>S203>Phosphoglycerate kinase 1 SwissPROT>PGK1_MOUSE>S203>Phosphoglycerate kinase 1 OS=Mus musculus GN=Pgk1 IPI>P09411>S203>Phosphoglycerate kinase 1 IPI>IPI00555069.3>S203>Pgk1 Phosphoglycerate kinase 1 NCBI>146345481>S203>Phosphoglycerate kinase 1 NCBI>123227543>S203>phosphoglycerate kinase 1 [Mus musculus] NCBI>80477474>S203>Phosphogly…	K.ALES*PERPFLAILGGAK.V	S203*	UNI:P09411	1.19537e+07	1.19537e+07	15184893	13380212	7296072		1.32888e+07	17082431	14946226	7837809		0.899532	0.0272191	616.993	1.25962	33.99	100	0.6245	3	0		146345481	Phosphoglycerate kinase 1	P09411	PGK1_MOUSE	02412_1	390412	1.25962	F	33.99	cytoplasm integral to membrane	glycolysis carbohydrate metabolic process	ATP binding transferase activity	Glycolysis / Gluconeogenesis Carbon fixation in photosynthetic organisms
1959153	Ankyrin repeat domain-containing protein 17	Manual Assigned Name:Ankyrin repeat domain-containing protein 17 IPI>Q99NH0>Ankyrin repeat domain-containing protein 17 IPI>IPI00272501.4>Ankrd17 ankyrin repeat domain-containing protein 17 isoform b IPI>IPI00465535.1>Ankrd17 Isoform 1 of Ankyrin repeat domain-containing protein 17 IPI>E9QKG6>Uncharacterized protein NCBI>160017861>Ankyrin repeat domain-containing protein 17 (Gene trap ankyrin rep…	R.APS*PAPSSVPLGSEKPSSVSQDR.K	S2401	UNI:Q99NH0	7.80217e+06	7.80217e+06	5854394	11608561	6760789	6984954	8.6685e+06	6538057	11643998	8435994	8055959	0.90006	0.043939	793.383	0.568513	33.91	39.2403	0.550881	3	0		160017861	Ankyrin repeat domain-containing protein 17 (Gene trap ankyrin repeat protein) (Ankyrin repeat domain-containing protein FOE) [MASS=274211]	Q99NH0	ANR17_MOUSE		391130	0.125308	F	33.91	nucleus	mismatch repair	ATP binding
1958990	Ankyrin repeat and SAM domain containing 1	Manual Assigned Name:Ankyrin repeat and SAM domain containing 1 HPRD>10610_1>S647>Odin SwissPROT>ANKS1_MOUSE>S662>Ankyrin repeat and SAM domain-containing protein 1 SwissPROT>ANS1A_MOUSE>S642>Isoform 2 of Ankyrin repeat and SAM domain-containing protein 1A OS=Mus musculus GN=Anks1a SwissPROT>Q3UHP6_MOUSE>S663>Ankyrin repeat and SAM domain containing 1 OS=Mus musculus GN=Anks1 IPI>Q3UHP6>S663>Anky…	R.SES*LSNCSIGK.K	S663*	UNI:Q3UHP6	3.21986e+06	3.21986e+06	2121572	3649880	4421481	2686515	3.57721e+06	2154693	3952625	5008502	3193036	0.900103	0.0396527	635.267	0.994072	65.82	25.4218	0.94993	2	0		30580337	Ankyrin repeat and SAM domain containing protein 1 [MASS=125241]	Q3UHP6	Q3UHP6_MOUSE	10610_1	373326	0.0330832	F	65.82	cytoplasm synapse	cell cycle biological_process embryo implantation	protein binding
1958873	Ubiquitin-associated protein 2-like	Manual Assigned Name:Ubiquitin-associated protein 2-like SwissPROT>Q8BJ53_MOUSE>S477>Putative uncharacterized protein OS=Mus musculus GN=Ubap2l SwissPROT>UBP2L_MOUSE>S502>Isoform 5 of Ubiquitin-associated protein 2-like OS=Mus musculus GN=Ubap2l IPI>Q80X50>S497>Ubiquitin-associated protein 2-like IPI>Q80X50-2>S497>Isoform 2 of Ubiquitin-associated protein 2-like IPI>Q80X50-3>S497>Isoform 3 of Ubi…	K.STSAPQMSPGSSDNQSSS*PQPAQQK.L	S497*	UNI:Q80X50	1.57166e+06	1.57166e+06	666138	1983208	1976016	1661280	1.74443e+06	657055	2195428	2259000	1866256	0.900957	0.0454977	874.04	0.351894	23.21	10.1889	0.769681	3	0		81895299	Ubiquitin-associated protein 2-like	Q80X50	UBP2L_MOUSE		384755	0.351894	F	23.21	cellular_component nucleus endosome	modification-dependent protein catabolic process blood coagulation	protein binding
1960237	Ubiquitin-associated protein 2-like	Manual Assigned Name:Ubiquitin-associated protein 2-like SwissPROT>Q8BJ53_MOUSE>S470>Putative uncharacterized protein OS=Mus musculus GN=Ubap2l SwissPROT>UBP2L_MOUSE>S495>Isoform 5 of Ubiquitin-associated protein 2-like OS=Mus musculus GN=Ubap2l IPI>Q80X50>S490>Ubiquitin-associated protein 2-like IPI>Q80X50-2>S490>Isoform 2 of Ubiquitin-associated protein 2-like IPI>Q80X50-3>S490>Isoform 3 of Ubi…	K.STSAPQMSPGS*SDNQSSSPQPAQQK.L	S490*	UNI:Q80X50	1.57166e+06	1.57166e+06	666138	1983208	1976016	1661280	1.74443e+06	657055	2195428	2259000	1866256	0.900957	0.0454977	871.369	0.475481	22.49	4.58638	0.285209	3	0		81895299	Ubiquitin-associated protein 2-like	Q80X50	UBP2L_MOUSE		384755	0.475481	F	22.49	cellular_component nucleus endosome	modification-dependent protein catabolic process blood coagulation	protein binding
1958887	Serum deprivation-response protein	Manual Assigned Name:Serum deprivation-response protein SwissPROT>SDPR_MOUSE>S218>Serum deprivation-response protein OS=Mus musculus GN=Sdpr IPI>Q63918>S218>Serum deprivation-response protein IPI>IPI00135660.5>S218>Sdpr Serum deprivation-response protein NCBI>81884028>S218>Serum deprivation-response protein (Phosphatidylserine-binding protein) NCBI>20072521>S218>serum deprivation response [Mus mu…	R.DEEALEDS*AEEK.M	S218	UNI:Q63918	2.7606e+07	2.7606e+07	16784839	30864323	55960642	6814104	2.98155e+07	17760614	34839301	59031890	7630221	0.925893	0.0266426	726.779	0.249217	62.96	100	0.977003	2	0		81884028	Serum deprivation-response protein (Phosphatidylserine-binding protein)	Q63918	SDPR_MOUSE		382219	0.166604	F	62.96	membrane	cell adhesion	protein binding
1958683	Polymerase I and transcript release factor	Manual Assigned Name:Polymerase I and transcript release factor SwissPROT>PTRF_MOUSE>S367S389S391>Polymerase I and transcript release factor OS=Mus musculus GN=Ptrf IPI>O54724>S367S389S391>Polymerase I and transcript release factor IPI>IPI00117689.1>S367S389S391>Ptrf Polymerase I and transcript release factor NCBI>56749456>S367S389S391>Polymerase I and transcript release factor [MASS=43953] NCBI>…	R.GS*SPDVHTLLEITEESDAVLVDKS*DS*D.-	S367S389S391*	UNI:O54724	3.52197e+07	3.52197e+07	24153543	43279395	38226300		3.795e+07	24696830	47787048	41366168		0.928056	0.0499372	1036.09	0.831227	31.15	53.5513	0.950364	3	0		56749456	Polymerase I and transcript release factor [MASS=43953]	O54724	PTRF_MOUSE		382871	0.347041	F	31.15	nucleus	regulation of transcription	protein binding
1958618	ATP-binding cassette sub-family F member 1	Manual Assigned Name:ATP-binding cassette sub-family F member 1 SwissPROT>ABCF1_MOUSE>S138>ATP-binding cassette sub-family F member 1 OS=Mus musculus GN=Abcf1 SwissPROT>Q5RL55_MOUSE>S138>"ATP-binding cassette, sub-family F (GCN20), member 1 OS=Mus musculus GN=Abcf1" IPI>Q6P542>S138>ATP-binding cassette sub-family F member 1 IPI>IPI00396671.1>S138>Abcf1 ATP-binding cassette sub-family F member 1 I…	K.GGNVFEALIQDDS*EEEEEEEENR.V	S138*	UNI:Q6P542	5.10326e+06	5.10326e+06	3404832	8940332	8063259	4615	5.38786e+06	2278062	6751943	7133583		0.947177	0.0440881	1374.05	0.1376	72.5	100	0.947576	2	0		56417892	ATP-binding cassette, sub-family F, member 1 [MASS=94945]	Q6P542	Q5RL55_MOUSE		377554	0.131776	F	72.5	ribosome	transport metabolic process	ATP binding
