# Supplementary material for: Identification of Sucrose Non-Fermenting–Related Kinase (SNRK) as a Suppressor of Adipocyte Inflammation
Source: Oxford University Press journal article supplement (doi:10.2337/db12-1081), 2013-03-22
Supplement: db121081supplementarydata3.xls [file db121081supplementarydata3.xls]

## Sheet: Sheet1
counter	timecourse manual naming::protein name manual	all protein name index	assigned sequence	phosphosite annotated	accession number for psite	shSNRK/shGFP	qvalues for SILAC	heatmap peakarea Final for display labelfree 1	peakarea manual 1	peakarea manual 1 rep1 thresholded	peakarea manual 1 rep2 thresholded	peakarea manual 1 rep3 thresholded	peakarea manual 1 rep4 thresholded	peakarea manual 2	peakarea manual 2 rep1 thresholded	peakarea manual 2 rep2 thresholded	peakarea manual 2 rep3 thresholded	peakarea manual 2 rep4 thresholded	isolated mass timepoints	mass error timepoints	xcorr timepoints	ascorr timepoints	spectral score timepoints	charge state timepoints	delta cn timepoints	drosophila CG accession number	gi species adjust	gi name species adjust	IPI accession number	swissprot accession	hprd accession	string accession	mass error minimum across timepoints	reversed databse direction	xcorr max across timepoints	Go location unique index	Go bio process unqiue index	Go mol process unique index	Kegg unique index
1960025	Likely ortholog of H. sapiens chromosome 9 open reading frame 138 (C9orf138)	Manual Assigned Name:Likely ortholog of H. sapiens chromosome 9 open reading frame 138 (C9orf138) SwissPROT>B1AXP3_MOUSE>T311>Likely ortholog of H. sapiens chromosome 9 open reading frame 138 (C9orf138) OS=Mus musculus GN=Fam154a IPI>B1AXP3>T311>Likely ortholog of H. sapiens chromosome 9 open reading frame 138 (C9orf138) IPI>IPI00403755.1>T311>Fam154a MCG1697, isoform CRA_a NCBI>148699061>T311>mC…	K.MDLLTTVQT*HYK.Y	T311	UNI:B1AXP3	1030.37	0.00652705	2.8986e+08	2.8986e+08	243892804	498016880	251044869	166484840	281317	385152	203172	335808	201136	510.574	1.05183	20.19	10.9255	0.637972	3	0		148699061	mCG1697, isoform CRA_a [Mus musculus] [MASS=54784]	B1AXP3	B1AXP3_MOUSE		375246	1.05183	F	20.19
1959390	Card6 caspase recruitment domain family, member 6	Manual Assigned Name:Card6 caspase recruitment domain family, member 6 SwissPROT>Q8BWE0_MOUSE>Putative uncharacterized protein (Fragment) OS=Mus musculus GN=Card6 IPI>IPI00351041.1>Card6 caspase recruitment domain family, member 6 IPI>E9PWH2>Uncharacterized protein NCBI>253314487>caspase recruitment domain family, member 6 [Mus musculus] [MASS=131468] NCBI>148671439>mCG114323, isoform CRA_b [Mus …	K.S*IRT*LPHIK.Y	S870T873	UNI:IPI00351041.1	687.586	0.00652705	1.04944e+09	1.04944e+09	1015010399	1126781142	901461134	1154488260	1.52626e+06	1018216	1719680	573275	2793873	612.798	0.475261	22.63	100	0.147071	2	0		253314487	caspase recruitment domain family, member 6 [Mus musculus] [MASS=131468]	IPI00351041.1	Q8BWE0_MOUSE		383411	0.475261	F	22.63	intracellular	regulation of apoptosis	protein binding	NOD-like receptor signaling pathway
1960315	AP2-associated protein kinase 1	Manual Assigned Name:AP2-associated protein kinase 1 HPRD>10620_1>T620S623>AP2 associated kinase 1 SwissPROT>AAK1_MOUSE>T537S540>Isoform 2 of AP2-associated protein kinase 1 OS=Mus musculus GN=Aak1 IPI>Q3UHJ0>T618S621>AP2-associated protein kinase 1 IPI>Q3UHJ0-2>T618S621>Isoform 2 of AP2-associated protein kinase 1 IPI>IPI00356608.4>T618S621>Aak1 Isoform 2 of AP2-associated protein kinase 1 IPI>I…	K.VGSLT*PPS*SPK.T	T618S621*	UNI:Q3UHJ0	80.6261	0.00652705	1.20318e+08	1.20318e+08	141745804	192812603	130431149	16280491	1.49229e+06	1482301	1807683	2346602	332573	615.265	0.559567	35.76	33.7643	0.791518	2	0		115503759	AP2-associated protein kinase 1 (Adaptor-associated kinase 1) [MASS=103345]	Q3UHJ0	AAK1_MOUSE	10620_1	370122	0.559567	F	35.76	membrane	protein amino acid phosphorylation	ATP binding
1960292	Serine/threonine-protein kinase SIK2	Manual Assigned Name:Serine/threonine-protein kinase SIK2 HPRD>12348_1>S358>Salt inducible kinase 2 SwissPROT>SIK2_MOUSE>S358>Serine/threonine-protein kinase SIK2 OS=Mus musculus GN=Sik2 SwissPROT>SN1L2_MOUSE>S358>Serine/threonine-protein kinase SNF1-like kinase 2 (EC 2.7.1.37) (Salt inducible kinase 2) IPI>Q8CFH6>S358>Serine/threonine-protein kinase SIK2 IPI>IPI00229305.1>S358>Sik2 Serine/threon…	R.RPS*TIAEQTVAK.A	S358	UNI:Q8CFH6	16.1784	0.0094881	1.10511e+07	1.10511e+07	10305944	18716187	10288712	4893732	683079	973900	851695	626241	280479	466.908	0.0807887	34.31	12.3145	0.718944	3	0		59798961	Serine/threonine-protein kinase SNF1-like kinase 2 (Salt inducible kinase 2) [MASS=104198]	Q8CFH6	SN1L2_MOUSE	12348_1	378034	0.0807887	F	34.31	nucleus	protein amino acid phosphorylation	protein binding
1959732	Interferon-induced helicase C domain-containing protein 1	Manual Assigned Name:Interferon-induced helicase C domain-containing protein 1 SwissPROT>IFIH1_MOUSE>S240>Isoform 2 of Interferon-induced helicase C domain-containing protein 1 OS=Mus musculus GN=Ifih1 IPI>Q8R5F7>S289>Interferon-induced helicase C domain-containing protein 1 IPI>Q8R5F7-2>S289>Isoform 2 of Interferon-induced helicase C domain-containing protein 1 IPI>IPI00172284.2>S289>Ifih1 Isofo…	R.DSGTMGS*DSDESVIQTK.R	S289	UNI:Q8R5F7	11.2148	0.0396527	1.11447e+06	1.11447e+06	1181467	1101803	1715991	458604	99374.9	60180		90605	147340	918.864	0.265691	51.63	22.4115	0.72537	2	0		62510931	Interferon induced with helicase C domain protein 1 (Helicase with 2 CARD domains) (Helicard) (Melanoma differentiation-associated protein 5) (MDA-5) [MASS=115971]	Q8R5F7	IFIH1_MOUSE		374495	0.265691	F	51.63	nucleus	immune response	protein binding	RIG-I-like receptor signaling pathway
1960434	Z-DNA-binding protein 1	Manual Assigned Name:Z-DNA-binding protein 1 SwissPROT>A2APF7_MOUSE>Z-DNA binding protein 1 OS=Mus musculus GN=Zbp1 IPI>Q9QY24>Z-DNA-binding protein 1 IPI>IPI00135469.1>Zbp1 Isoform 1 of Z-DNA-binding protein 1 IPI>IPI00915524.1>Zbp1 Z-DNA-binding protein 1 isoform 1 IPI>A2APF7>Uncharacterized protein NCBI>25453361>Z-DNA binding protein 1 (Tumor stroma and activated macrophage protein DLM-1) NCBI…	R.AMALGDSS*PQTTEPVLR.E	S384	UNI:Q9QY24	7.51031	0.0334243	2.59398e+06	2.59398e+06	2197013	4662251	2226568	1290102	345390	63112	450534	112980	754932	926.93	0.571012	31.9	22.4677	0.667322	2	0		25453361	Z-DNA binding protein 1 (Tumor stroma and activated macrophage protein DLM-1)	Q9QY24	ZBP1_MOUSE		374775	0.571012	F	31.9	intracellular integral to membrane	multicellular organismal development protein amino acid dephosphorylation	DNA binding RNA binding
1960406	Phosphatidylinositol 4-kinase beta	Manual Assigned Name:Phosphatidylinositol 4-kinase beta HPRD>11805_1>S523>Phosphatidylinositol 4 kinase catalytic beta polypeptide SwissPROT>PI4KB_MOUSE>S179>Isoform 3 of Phosphatidylinositol 4-kinase beta OS=Mus musculus GN=Pi4kb IPI>Q8BKC8>S511>Phosphatidylinositol 4-kinase beta IPI>Q8BKC8-2>S511>Isoform 2 of Phosphatidylinositol 4-kinase beta IPI>Q8BKC8-3>S511>Isoform 3 of Phosphatidylinositol…	R.RLS*EQLAHTPTAFK.R	S511*	UNI:Q8BKC8	7.1864	0.0230352	1.48878e+07	1.48878e+07	16303667	22447476	12113111	8687010	2.07166e+06	1462895	2578937	1552278	2692550	560.282	0.100665	20.9	74.9209	0.591015	3	0		229462734	RecName: Full=Phosphatidylinositol 4-kinase beta; Short=PtdIns 4-kinase beta; Short=PI4K-beta; Short=PI4Kbeta	Q8BKC8	PI4KB_MOUSE	11805_1	386312	0.100665	F	20.9	membrane	signal transduction phosphatidylinositol metabolic process	protein binding	Inositol phosphate metabolism Phosphatidylinositol signaling system
1960193	RNA binding motif protein 15	Manual Assigned Name:RNA binding motif protein 15 SwissPROT>Q0VBL3_MOUSE>S655>RNA binding motif protein 15 OS=Mus musculus GN=Rbm15 IPI>Q0VBL3>S655>RNA binding motif protein 15 IPI>IPI00340815.3>S655>Rbm15 RNA binding motif protein 15 NCBI>223459828>S655>RNA binding motif protein 15 [Mus musculus] [MASS=105721] NCBI>111308226>S655>RNA binding motif protein 15 [Mus musculus] [MASS=105721] NCBI>347…	R.HLDRS*PESERPR.K	S655	UNI:Q0VBL3	6.79199	0.0497237	1.37008e+06	1.37008e+06	1531852	1774108	137401	2036971	201721	441871	245691	92308	27012	530.25	1.18522	29.19	28.8472	0.677522	3	0		223459828	RNA binding motif protein 15 [Mus musculus] [MASS=105721]	Q0VBL3	Q0VBL3_MOUSE		381915	1.18522	F	29.19	nucleus	regulation of transcription	protein binding
1959318	182 kDa tankyrase-1-binding protein	Manual Assigned Name:182 kDa tankyrase-1-binding protein SwissPROT>TB182_MOUSE>S429>182 kDa tankyrase-1-binding protein OS=Mus musculus GN=Tnks1bp1 IPI>P58871>S429>182 kDa tankyrase-1-binding protein IPI>IPI00459443.5>S429>Tnks1bp1 182 kDa tankyrase-1-binding protein NCBI>150387848>S429>182 kDa tankyrase 1-binding protein [MASS=181824] NCBI>223462297>S429>Tankyrase 1 binding protein 1 [Mus muscul…	R.RFS*EGVLQPPSQDQEK.L	S429*	UNI:P58871	5.51668	0.0386766	3.47889e+06	3.47889e+06	4011311	4544870	3859590	1499780	630612	378160	528989	242109	1373192	962.945	1.59386	71.45	131.264	0.919686	2	0		150387848	182 kDa tankyrase 1-binding protein [MASS=181824]	P58871	TB182_MOUSE		379763	1.12838	F	71.45	nucleus	regulation of Rab GTPase activity	GTPase activator activity
1959993	Transmembrane and coiled-coil domains protein 2	Manual Assigned Name:Transmembrane and coiled-coil domains protein 2 HPRD>11040_1>S438>Cerebral protein 11 HPRD>15519_1>S216>transmembrane and coiled coil domains 3 SwissPROT>Q3T9T1_MOUSE>S200>Putative uncharacterized protein OS=Mus musculus GN=Tmcc2 SwissPROT>Q3TZY4_MOUSE>S357>Putative uncharacterized protein OS=Mus musculus GN=Tmcc2 SwissPROT>TMCC2_MOUSE>S435>Transmembrane and coiled-coil domai…	R.NKFGS*ADNIAHLK.D	S435	UNI:Q80W04	5.49455	0.0366099	6.11359e+06	6.11359e+06	3903753	6915290	7556443	6078878	1.11266e+06	507937	124669	231588	3586462	498.908	0.0187327	26.79	100	0.259272	3	0		158518639	Transmembrane and coiled-coil domains protein 3	Q80W04	TMCC3_MOUSE	15519_1	377932	0.0187327	F	26.79	integral to membrane	sensory perception of sound carbohydrate metabolic process	protein binding binding zinc ion binding
1960336	Testis expressed gene 2	Manual Assigned Name:Testis expressed gene 2 HPRD>13716_1>S196>HT008 protein SwissPROT>B1ATR2_MOUSE>S195>Testis expressed gene 2 OS=Mus musculus GN=Tex2 SwissPROT>TEX2_MOUSE>S195>Testis-expressed sequence 2 protein OS=Mus musculus GN=Tex2 IPI>B1ATR2>S195>Testis expressed gene 2 IPI>Q6ZPJ0>S195>Testis-expressed sequence 2 protein IPI>IPI00420516.3>S195>Tex2 Testis-expressed sequence 2 protein IPI>…	K.SLS*TEVEPK.E	S195	UNI:B1ATR2	5.4617	0.0275759	4.11519e+06	4.11519e+06	2318204	5277822	3716173	5148575	753464	525202	781142	158532	1548979	535.244	0.0916332	26.34	13.8917	0.726798	2	0		109895137	Testis-expressed sequence 2 protein	B1ATR2	TEX2_MOUSE	13716_1	378855	0.0916332	F	26.34	integral to membrane	protein amino acid phosphorylation signal transduction	ATP binding molecular_function
1959476	Protein PML	Manual Assigned Name:Protein PML SwissPROT>D3YXR5_MOUSE>S515>Uncharacterized protein OS=Mus musculus GN=Pml SwissPROT>D3Z3A6_MOUSE>S515>Uncharacterized protein OS=Mus musculus GN=Pml SwissPROT>PML_MOUSE>S469>Isoform 2 of Probable transcription factor PML OS=Mus musculus GN=Pml IPI>Q60953>S515>Protein PML IPI>Q60953-2>S515>Isoform 2 of Protein PML IPI>IPI00918130.1>S515>Pml Protein IPI>D3YXR5>S515…	R.LATSS*PEQSWPSTFK.A	S515	UNI:Q60953	4.86874	0.026975	1.51601e+07	1.51601e+07	10868517	23264464	15796762	10710763	3.11377e+06	1385962	3329700	1850915	5888487	873.393	0.382637	35.04	16.9461	0.84628	2	0		9313029	PML isoform 1 [Mus musculus]	Q60953	PML_MOUSE		379470	0.382637	F	35.04	nucleus	regulation of transcription	protein binding	Pathways in cancer Acute myeloid leukemia Ubiquitin mediated proteolysis
1959737	Protein PML	Manual Assigned Name:Protein PML SwissPROT>D3YXR5_MOUSE>T527>Uncharacterized protein OS=Mus musculus GN=Pml SwissPROT>D3Z3A6_MOUSE>T527>Uncharacterized protein OS=Mus musculus GN=Pml SwissPROT>PML_MOUSE>T481>Isoform 2 of Probable transcription factor PML OS=Mus musculus GN=Pml IPI>Q60953>T527>Protein PML IPI>Q60953-2>T527>Isoform 2 of Protein PML IPI>IPI00918130.1>T527>Pml Protein IPI>D3YXR5>T527…	K.AT*SPPHLDGTSNPESTVPEK.K	T527	UNI:Q60953	4.83314	0.0285086	5.45568e+06	5.45568e+06	6901179	6068119	6600379	2253058	1.12881e+06	899893	1035201	1156565	1423570	715.323	0.546187	34.71	6.77781	0.861329	3	0		9313029	PML isoform 1 [Mus musculus]	Q60953	PML_MOUSE		379470	0.546187	F	34.71	nucleus	regulation of transcription	protein binding	Pathways in cancer Acute myeloid leukemia Ubiquitin mediated proteolysis
1960353	Protein PML	Manual Assigned Name:Protein PML SwissPROT>D3YXR5_MOUSE>S528>Uncharacterized protein OS=Mus musculus GN=Pml SwissPROT>D3Z3A6_MOUSE>S528>Uncharacterized protein OS=Mus musculus GN=Pml SwissPROT>PML_MOUSE>S482>Isoform 2 of Probable transcription factor PML OS=Mus musculus GN=Pml IPI>Q60953>S528>Protein PML IPI>Q60953-2>S528>Isoform 2 of Protein PML IPI>IPI00918130.1>S528>Pml Protein IPI>D3YXR5>S528…	K.ATS*PPHLDGTSNPESTVPEK.K	S528	UNI:Q60953	4.83314	0.0285086	5.45568e+06	5.45568e+06	6901179	6068119	6600379	2253058	1.12881e+06	899893	1035201	1156565	1423570	715.323	0.479488	29.76	11.0073	0.816126	3	0		9313029	PML isoform 1 [Mus musculus]	Q60953	PML_MOUSE		379470	0.479488	F	29.76	nucleus	regulation of transcription	protein binding	Pathways in cancer Acute myeloid leukemia Ubiquitin mediated proteolysis
1960213	Interferon-induced, double-stranded RNA-activated protein kinase	Manual Assigned Name:Interferon-induced, double-stranded RNA-activated protein kinase SwissPROT>E2AK2_MOUSE>S32>"Interferon-induced, double-stranded RNA-activated protein kinase OS=Mus musculus GN=Eif2ak2" IPI>Q03963>S32>Interferon-induced, double-stranded RNA-activated protein kinase IPI>IPI00138256.1>S32>Eif2ak2 Interferon-induced, double-stranded RNA-activated protein kinase NCBI>2507204>S32>I…	K.ELSTS*GPPHDR.R	S32	UNI:Q03963	4.7379	0.0264414	217735	217735	316043	131111	252934	170851	45955.9	58783	9242	45799	69999	638.271	1.21674	22.62	9.77724	0.346028	2	0		2507204	Interferon-induced, double-stranded RNA-activated protein kinase (Interferon-inducible RNA-dependent protein kinase) (p68 kinase) (P1/eIF-2A protein kinase) (Serine/threonine-protein kinase TIK)	Q03963	E2AK2_MOUSE		373265	1.21674	F	22.62	intracellular	protein amino acid phosphorylation	protein binding
1960068	Protein PML	Manual Assigned Name:Protein PML SwissPROT>D3YXR5_MOUSE>S514S515>Uncharacterized protein OS=Mus musculus GN=Pml SwissPROT>D3Z3A6_MOUSE>S514S515>Uncharacterized protein OS=Mus musculus GN=Pml SwissPROT>PML_MOUSE>S468S469>Isoform 2 of Probable transcription factor PML OS=Mus musculus GN=Pml IPI>Q60953>S514S515>Protein PML IPI>Q60953-2>S514S515>Isoform 2 of Protein PML IPI>IPI00918130.1>S514S515>Pml…	R.LATS*S*PEQSWPSTFK.A	S514S515	UNI:Q60953	4.48647	0.0440881	5.33535e+06	5.33535e+06	4013329	10044318	3891601	3392167	1.18921e+06	52937	1361148	262999	3079755	917.385	1.99481	31.38	21.1936	0.884141	2	0		9313029	PML isoform 1 [Mus musculus]	Q60953	PML_MOUSE		379470	1.99481	F	31.38	nucleus	regulation of transcription	protein binding	Pathways in cancer Acute myeloid leukemia Ubiquitin mediated proteolysis
1960312	Akap13 A kinase (PRKA) anchor protein 13	Manual Assigned Name:Akap13 A kinase (PRKA) anchor protein 13 HPRD>05253_1>S1933>A kinase anchoring protein 13 HPRD>05253_2>S1929>A kinase anchoring protein 13 HPRD>05253_3>S174>A kinase anchoring protein 13 SwissPROT>Q3UZK5_MOUSE>S191>Putative uncharacterized protein (Fragment) OS=Mus musculus GN=Akap13 IPI>IPI00126181.9>S1910>Akap13 A kinase (PRKA) anchor protein 13 IPI>IPI00896072.1>S1910>Akap…	K.FLSHS*TDSLNK.I	S1910*	UNI:IPI00126181.9	4.1462	0.0339773	3.40407e+06	3.40407e+06	3356733	4368590	3134603	2756355	821010	346673	388616	625336	1923417	443.535	0.653325	23.01	7.78151	0.92967	3	0		189181672	A kinase (PRKA) anchor protein 13 [Mus musculus] [MASS=303974]	IPI00126181.9	Q3UZK5_MOUSE	05253_3		0.653325	F	23.01	nucleus intracellular	apoptosis intracellular signaling cascade	protein binding zinc ion binding
1959855	Receptor-interacting serine/threonine-protein kinase 2	Manual Assigned Name:Receptor-interacting serine/threonine-protein kinase 2 SwissPROT>RIPK2_MOUSE>S414>Receptor-interacting serine/threonine-protein kinase 2 OS=Mus musculus GN=Ripk2 IPI>P58801>S414>Receptor-interacting serine/threonine-protein kinase 2 IPI>IPI00139382.1>S414>Ripk2 Receptor-interacting serine/threonine-protein kinase 2 IPI>E9Q8S0>S414>Uncharacterized protein NCBI>20455219>S414>Re…	R.ASSCS*LAVISPFLVEK.G	S414	UNI:P58801	3.72317	0.0372609	3.40938e+06	3.40938e+06	3070665	6962780	3595399	8663	915720	1294569	852809	599780		894.438	1.85584	31.61		0.638871	2	0		20455219	Receptor-interacting serine/threonine protein kinase 2	P58801	RIPK2_MOUSE		378046	0.258409	F	31.61	cytoplasm	protein amino acid phosphorylation	protein binding	Neurotrophin signaling pathway NOD-like receptor signaling pathway
1959998	Mitogen-activated protein kinase kinase kinase kinase 5	Manual Assigned Name:Mitogen-activated protein kinase kinase kinase kinase 5 SwissPROT>M4K5_MOUSE>S414>Isoform 2 of Mitogen-activated protein kinase kinase kinase kinase 5 OS=Mus musculus GN=Map4k5 IPI>Q8BPM2>S433>Mitogen-activated protein kinase kinase kinase kinase 5 IPI>Q8BPM2-2>S433>Isoform 2 of Mitogen-activated protein kinase kinase kinase kinase 5 IPI>IPI00225230.1>S433>Map4k5 Isoform 1 of…	R.RQS*SPSCVPVAETSSSIGNGDGISK.L	S433	UNI:Q8BPM2	3.52708	0.0320659	2.21223e+06	2.21223e+06	1551837	2748960	2553323	1994807	627213	245718	355180	476374	1431578	867.393	0.374207	25.93	7.53501	0.666513	3	0		30315995	Mitogen-activated protein kinase kinase kinase kinase 5 (MAPK/ERK kinase kinase kinase 5) (MEK kinase kinase 5) (MEKKK 5)	Q8BPM2	M4K5_MOUSE		380271	0.374207	F	25.93	cytoplasm	protein amino acid phosphorylation	protein binding
1960018	Transcription intermediary factor 1-beta	Manual Assigned Name:Transcription intermediary factor 1-beta SwissPROT>TIF1B_MOUSE>S473>Isoform 2 of Transcription intermediary factor 1-beta OS=Mus musculus GN=Trim28 IPI>Q62318>S473>Transcription intermediary factor 1-beta IPI>Q62318-2>S473>Isoform 2 of Transcription intermediary factor 1-beta IPI>IPI00312128.3>S473>Trim28 Isoform 1 of Transcription intermediary factor 1-beta IPI>IPI00453895.3…	R.SRS*GEGEVSGLLR.K	S473*	UNI:Q62318	3.50775	0.0308302	3.17556e+06	3.17556e+06	2755261	3101653	3049895	3795425	905299	538313	1081143	260098	1741643	476.228	0.105841	24.13	6.64111	0.479837	3	0		3183181	Transcription intermediary factor 1-beta (TIF1-beta) (Tripartite motif protein 28) (KRAB-A interacting protein) (KRIP-1)	Q62318	TIF1B_MOUSE		370352	0.105841	F	24.13	nucleus	protein amino acid phosphorylation	protein binding
1959872	Microtubule-associated protein	Manual Assigned Name:Microtubule-associated protein HPRD>01141_1>S941>Microtubule associated protein 4 HPRD>01141_3>S676>Microtubule associated protein 4 SwissPROT>MAP4_MOUSE>S761>Isoform 4 of Microtubule-associated protein 4 OS=Mus musculus GN=Map4 IPI>E9PWC0>S761>Microtubule-associated protein IPI>E9PZ43>S761>Microtubule-associated protein IPI>E9QKJ8>S761>Microtubule-associated protein IPI>E9QP…	R.SKVGS*TENIK.H	S761*	UNI:E9PWC0	3.48228	0.0289195	1.26878e+06	1.26878e+06	1131913	777879	1252967	1912380	364354	95573	136818	152201	1072825	571.775	1.76098	24.2	13.8917	0.271319	2	0		148887397	Microtubule-associated protein 4 (MAP 4)	E9PWC0	MAP4_MOUSE	01141_3	377095	1.76098	F	24.2	microtubule	negative regulation of microtubule depolymerization	protein binding binding metal ion binding
1960235	Hepatoma-derived growth factor	Manual Assigned Name:Hepatoma-derived growth factor IPI>P51859>Hepatoma-derived growth factor IPI>IPI00313817.1>Hdgf Hepatoma-derived growth factor IPI>E0CXA0>Uncharacterized protein IPI>IPI00882349.1>Hdgf Uncharacterized protein	R.RAGDVLEDS*PKRPK.E	S165	UNI:P51859	3.45888	0.0331635	4.12983e+06	4.12983e+06	4775155	2860509	3424527	5459129	1.19398e+06	1662161	844170	228128	2041453	549.945	0.223325	22.4	100	0.141982	3	0				P51859	HDGF_MOUSE		370274	0.223325	F	22.4
1958938	CLIP-associating protein 1	Manual Assigned Name:CLIP-associating protein 1 HPRD>09322_1>S600>CLIP associated protein 1 SwissPROT>CLAP1_MOUSE>S600>Isoform 2 of CLIP-associating protein 1 OS=Mus musculus GN=Clasp1 IPI>Q80TV8>S600>CLIP-associating protein 1 IPI>Q80TV8-2>S600>Isoform 2 of CLIP-associating protein 1 IPI>IPI00672213.3>S600>Clasp1 CLIP-associating protein 1 isoform 1 IPI>IPI00669522.4>S600>Clasp1 Isoform 2 of CLI…	R.SRS*DIDVNAAASAK.S	S600*	UNI:Q80TV8	3.45794	0.0246184	3.80704e+06	3.80704e+06	4631570	3868140	3388025	3340431	1.10096e+06	1199614	972565	544387	1687258	495.563	0.928149	34.85		0.556181	3	0		124007127	CLIP-associating protein 1 (Cytoplasmic linker-associated protein 1) [MASS=169226]	Q80TV8	CLAP1_MOUSE	09322_1	374249	0.928149	F	34.85	cytoplasm integral to membrane	cell cycle G-protein coupled receptor protein signaling pathway	protein binding binding
1960156	Rho guanine nucleotide exchange factor 17	Manual Assigned Name:Rho guanine nucleotide exchange factor 17 HPRD>10658_1>S463>Rho guanine nucleotide exchange factor 17 IPI>Q80U35>S458>Rho guanine nucleotide exchange factor 17 IPI>IPI00465761.5>S458>Arhgef17 Isoform 1 of Rho guanine nucleotide exchange factor 17 NCBI>147742931>S458>Rho guanine nucleotide exchange factor 17 [MASS=221670] NCBI>148684535>S458>mCG116432, isoform CRA_a [Mus muscu…	K.SLS*NPDIASETLTLLSFLR.S	S458	UNI:Q80U35	3.16764	0.0379721	144005	144005	259975	80153	91888		45461.4	98557	25743	12084		1079.05	0.305041	21.19		0.69584	2	0		147742931	Rho guanine nucleotide exchange factor 17 [MASS=221670]	Q80U35	ARHGH_MOUSE	10658_1		0.305041	F	21.19	intracellular	actin cytoskeleton organization apoptosis	guanyl-nucleotide exchange factor activity
1958660	MCG5400	Manual Assigned Name:MCG5400 HPRD>10095_1>T19S20>Myosin regulatory light chain MRLC2 HPRD>14735_1>T18S19>Myosin regulatory light chain MRCL3 HPRD>17619_1>T19S20>Myosin regulatory light polypeptide 9 HPRD>17619_2>T19S20>Myosin regulatory light polypeptide 9 SwissPROT>D3YV37_MOUSE>T19S20>Uncharacterized protein OS=Mus musculus GN=2900073G15Rik SwissPROT>D3Z249_MOUSE>T19S20>Uncharacterized protein O…	R.AT*S*NVFAMFDQSQIQEFK.E	T19S20	UNI:Q6ZWQ9	3.04436	0.0342506	1.00925e+07	1.00925e+07	11182617	14443182	4651692		3.31514e+06	5162829	5214812	2871776	11156	750.978	0.195032	25.98	28.7998	0.872618	3	0		38605043	Myosin regulatory light chain 2, smooth muscle isoform (Myosin RLC)	Q6ZWQ9	Q9D6E6_MOUSE	17619_2	392092	0.195032	F	25.98	myosin complex protein complex integral to membrane membrane nucleus ubiquitin ligase complex	signal transduction multicellular organismal development regulation of muscle contraction muscle contraction DNA repair signal peptide processing intracellular signaling cascade RNA-dependent DNA replication regulation of transcription, DNA-dependent protein amino acid phosphorylation protein ubiquitination	protein binding calcium ion binding	Cardiac muscle contraction Regulation of actin cytoskeleton Vascular smooth muscle contraction Focal adhesion Leukocyte transendothelial migration Tight junction Hypertrophic cardiomyopathy (HCM) Dilated cardiomyopathy
1959396	Perilipin-1	Manual Assigned Name:Perilipin-1 HPRD>01364_1>S81>Perilipin SwissPROT>PLIN_MOUSE>S81>Perilipin (PERI) (Lipid droplet-associated protein) SwissPROT>PLIN1_MOUSE>S81>Isoform 4 of Perilipin-1 OS=Mus musculus GN=Plin1 IPI>Q8CGN5>S81>Perilipin-1 IPI>Q8CGN5-2>S81>Isoform 2 of Perilipin-1 IPI>Q8CGN5-3>S81>Isoform 3 of Perilipin-1 IPI>Q8CGN5-4>S81>Isoform 4 of Perilipin-1 IPI>IPI00387480.1>S81>Plin Perili…	R.RLS*TQFTAANELACR.G	S81*	UNI:Q8CGN5	3.02325	0.0366099	4.45335e+07	4.45335e+07	74842188	48084140	34892243	20315431	1.47303e+07	31563826	4149523	20435243	2772779	606.617	0.443934	51	11.2614	0.946154	3	0		261260072	RecName: Full=Perilipin-1; AltName: Full=Lipid droplet-associated protein; AltName: Full=Perilipin A	Q8CGN5	PLIN1_MOUSE	01364_1	390074	0.443934	F	51	lipid particle	lipid metabolic process	protein binding	PPAR signaling pathway
1959339	Eukaryotic translation initiation factor 4 gamma 3	Manual Assigned Name:Eukaryotic translation initiation factor 4 gamma 3 SwissPROT>A2AMI2_MOUSE>S267>"Eukaryotic translation initiation factor 4 gamma, 3 OS=Mus musculus GN=Eif4g3" SwissPROT>A2AMI6_MOUSE>S277>"Eukaryotic translation initiation factor 4 gamma, 3 OS=Mus musculus GN=Eif4g3" SwissPROT>IF4G3_MOUSE>S285>Isoform 4 of Eukaryotic translation initiation factor 4 gamma 3 OS=Mus musculus GN=E…	R.TSS*PTSLPPLAR.S	S267	UNI:Q80XI3	2.90497	0.0094881	2.54211e+07	2.54211e+07	18338842	31842539	27598331	23904862	8.75093e+06	7587049	10637481	8540927	8238255	653.825	1.91942	21.55	13.9358	0.657031	2	0		48428375	Eukaryotic translation initiation factor 4 gamma 3 (eIF-4-gamma 3) (eIF-4G 3) (eIF4G 3) (eIF-4-gamma II) (eIF4GII) [MASS=174889]	Q80XI3	IF4G3_MOUSE		389515	1.91942	F	21.55	cytoplasm integral to membrane	translation RNA metabolic process	protein binding	Viral myocarditis
1959692	Dclk1 protein	Manual Assigned Name:Dclk1 protein HPRD>09202_1>S332T336>Doublecortin and CaM kinase like 1 SwissPROT>A8IP62_MOUSE>S25T29>Activity and neurotransmitter-induced early gene protein 4 OS=Mus musculus GN=Dclk1 SwissPROT>DCAK1_MOUSE>S332T336>Serine/threonine-protein kinase DCAMKL1 (EC 2.7.1.37) (Doublecortin-like and CAM kinase-like 1) SwissPROT>DCLK1_MOUSE>S332T336>Isoform 2 of Serine/threonine-prote…	K.SPS*PSPT*SPGSLR.K	S332T336	UNI:Q80VB6	2.89565	0.0246184	3.94754e+06	3.94754e+06	2198707	6022668	5265060	2303707	1.36326e+06	478678	1870723	1826950	1276709	715.291	0.700908	43.41	14.45	0.723171	2	0		20137987	Serine/threonine-protein kinase DCAMKL1 (Doublecortin-like and CAM kinase-like 1)	Q80VB6	Q9JLM7_MOUSE	09202_1	380814	0.700908	F	43.41	nucleus integral to plasma membrane integral to membrane intracellular	protein amino acid phosphorylation brain development transport intracellular signaling cascade	ATP binding protein binding guanyl-nucleotide exchange factor activity kinase activity transferase activity
1959954	Dclk1 protein	Manual Assigned Name:Dclk1 protein HPRD>09202_1>S330T336>Doublecortin and CaM kinase like 1 SwissPROT>A8IP62_MOUSE>S23T29>Activity and neurotransmitter-induced early gene protein 4 OS=Mus musculus GN=Dclk1 SwissPROT>DCAK1_MOUSE>S330T336>Serine/threonine-protein kinase DCAMKL1 (EC 2.7.1.37) (Doublecortin-like and CAM kinase-like 1) SwissPROT>DCLK1_MOUSE>S330T336>Isoform 2 of Serine/threonine-prote…	K.S*PSPSPT*SPGSLR.K	S330T336	UNI:Q80VB6	2.89565	0.0246184	3.94754e+06	3.94754e+06	2198707	6022668	5265060	2303707	1.36326e+06	478678	1870723	1826950	1276709	715.292	0.0153892	21.64	14.813	0.521961	2	0		20137987	Serine/threonine-protein kinase DCAMKL1 (Doublecortin-like and CAM kinase-like 1)	Q80VB6	Q9JLM7_MOUSE	09202_1	380814	0.0153892	F	21.64	nucleus integral to plasma membrane integral to membrane intracellular	protein amino acid phosphorylation brain development transport intracellular signaling cascade	ATP binding protein binding guanyl-nucleotide exchange factor activity kinase activity transferase activity
1960247	Tjp1 protein	Manual Assigned Name:Tjp1 protein HPRD>03002_1>S617>Tight junction protein 1 HPRD>03002_2>S617>Tight junction protein 1 SwissPROT>B9EHJ3_MOUSE>S617>Tjp1 protein OS=Mus musculus GN=Tjp1 SwissPROT>ZO1_MOUSE>S617>Tight junction protein ZO-1 OS=Mus musculus GN=Tjp1 IPI>B9EHJ3>S617>Tjp1 protein IPI>P39447>S617>Tight junction protein ZO-1 IPI>IPI00135971.1>S617>Tjp1 Tight junction protein ZO-1 IPI>IPI0…	K.S*REDLSAQPVQTK.F	S617*	UNI:B9EHJ3	2.86241	0.0480929	2.87844e+06	2.87844e+06	1557968	3129107	3364011	3462678	1.0056e+06	465079	165607	97656	3294064	513.578	0.2944	29.05	31.9269	0.674402	3	0		342187308	RecName: Full=Tight junction protein ZO-1; AltName: Full=Tight junction protein 1; AltName: Full=Zona occludens protein 1; AltName: Full=Zonula occludens protein 1	B9EHJ3	ZO1_MOUSE	03002_2	376170	0.2944	F	29.05	nucleus membrane cytoplasm	blastocyst formation cell-cell junction assembly regulation of transcription, DNA-dependent	protein binding	Tight junction Epithelial cell signaling in Helicobacter pylori infection Gap junction Adherens junction Vibrio cholerae infection
1959407	Septin-2	Manual Assigned Name:Septin-2 HPRD>03297_1>S218>Septin 2 HPRD>03297_2>S218>Septin 2 HPRD>03297_3>S218>Septin 2 HPRD>03297_4>S218>Septin 2 SwissPROT>SEPT2_MOUSE>S218>Septin-2 OS=Mus musculus GN=Sept2 IPI>P42208>S218>Septin-2 IPI>IPI00114945.1>S218>Sept2 Septin-2 IPI>IPI00930754.1>S218>Sept2 septin-2 b IPI>E9Q3V6>S218>Uncharacterized protein NCBI>1346679>S218>Septin 2 (NEDD5 protein) NCBI>187954005…	K.IYHLPDAES*DEDEDFK.E	S218*	UNI:P42208	2.84493	0.0308302	7.81923e+07	7.81923e+07	56031835	130548465	93005575	33183357	2.74848e+07	17310410	54284833	35111081	3232742	670.942	0.874274	43.63	71.752	0.981501	3	0		1346679	Septin 2 (NEDD5 protein)	P42208	SEPT2_MOUSE	03297_4	374203	0.214839	F	43.63	nucleus	cell cycle	protein binding
1959537	Actin, cytoplasmic 1	Manual Assigned Name:Actin, cytoplasmic 1 HPRD>00015_1>S241>Actin alpha, cardiac muscle HPRD>00016_1>S240>Actin gamma 2, smooth muscle enteric HPRD>00017_1>S239>Actin gamma 1 HPRD>00030_1>S241>Actin alpha, skeletal muscle 1 HPRD>00031_1>S241>Actin alpha 2 HPRD>00032_1>S239>Actin beta HPRD>12329_4>S939>Protein expressed in prostate ovary testis and placenta 2 HPRD>18598_1>S240>Similar to RIKEN cDN…	K.S*YELPDGQVITIGNER.F	S239	UNI:P60710	2.7946	0.0440881	3.11615e+06	3.11615e+06	3011288	4506804	4477976	468538	1.11506e+06	1623664	1605260	1214704	16611	935.933	0.442577	58.88	137.225	0.918882	2	0		6425087	gamma actin-like protein [Mus musculus]	P60710	Q9QZ83_MOUSE	18642_1	375785	0.442577	F	58.88	cytoplasm membrane cytoskeleton actin cytoskeleton cytosol	DNA repair muscle contraction response to mechanical stimulus regulation of blood pressure apoptosis axonogenesis response to calcium ion sarcomere organization G-protein coupled receptor protein signaling pathway telomere maintenance transport protein transport oxidation reduction signal transduction cell growth intracellular signaling cascade	protein binding	Cardiac muscle contraction Regulation of actin cytoskeleton Vascular smooth muscle contraction Focal adhesion Leukocyte transendothelial migration Tight junction Hypertrophic cardiomyopathy (HCM) Adherens junction Pathogenic Escherichia coli infection Arrhythmogenic right ventricular cardiomyopathy (ARVC) Vibrio cholerae infection Viral myocarditis Dilated cardiomyopathy
1960324	Protein PML	Manual Assigned Name:Protein PML SwissPROT>D3YXR5_MOUSE>T535>Uncharacterized protein OS=Mus musculus GN=Pml SwissPROT>D3Z3A6_MOUSE>T535>Uncharacterized protein OS=Mus musculus GN=Pml SwissPROT>PML_MOUSE>T489>Isoform 2 of Probable transcription factor PML OS=Mus musculus GN=Pml IPI>Q60953>T535>Protein PML IPI>Q60953-2>T535>Isoform 2 of Protein PML IPI>IPI00918130.1>T535>Pml Protein IPI>D3YXR5>T535…	K.ATSPPHLDGT*SNPESTVPEKK.I	T535	UNI:Q60953	2.71523	0.0328695	2.92435e+06	2.92435e+06	3448402	2663577	1606131	3979305	1.07702e+06	475941	674008	290466	2867660	568.768	0.243833	26.77	2.26648	0.51883	4	0		9313029	PML isoform 1 [Mus musculus]	Q60953	PML_MOUSE		379470	0.243833	F	26.77	nucleus	regulation of transcription	protein binding	Pathways in cancer Acute myeloid leukemia Ubiquitin mediated proteolysis
1959097	Eukaryotic translation initiation factor 4 gamma 1	Manual Assigned Name:Eukaryotic translation initiation factor 4 gamma 1 HPRD>06774_1>S1187>eIF 4G1 HPRD>06774_2>S1100>eIF 4G1 HPRD>06774_3>S1023>eIF 4G1 HPRD>06774_4>S991>eIF 4G1 HPRD>06774_5>S1187>eIF 4G1 SwissPROT>IF4G1_MOUSE>S1175>Isoform 2 of Eukaryotic translation initiation factor 4 gamma 1 OS=Mus musculus GN=Eif4g1 SwissPROT>Q8K0J8_MOUSE>S231>Eif4g1 protein OS=Mus musculus GN=Eif4g1 IPI>Q6…	R.SFS*KEVEER.S	S1189*	UNI:Q6NZJ6	2.69284	0.0434125	4.67493e+06	4.67493e+06	3397278	3784656	8562302	2955475	1.73606e+06	1513622	1670211	1362215	2398188	595.758	0.678701	30.41	18.8596	0.78296	2	0		67461015	Eukaryotic translation initiation factor 4 gamma 1 (eIF-4-gamma 1) (eIF-4G 1) (eIF-4G1)	Q6NZJ6	Q8K0J8_MOUSE	06774_5	380235	0.267113	F	30.41	cytoplasm	translation RNA metabolic process	protein binding	Viral myocarditis
1959090	RNA-binding protein 8A	Manual Assigned Name:RNA-binding protein 8A HPRD>05609_1>S56>RNA binding motif protein 8A SwissPROT>RBM8A_MOUSE>S55>Isoform 2 of RNA-binding protein 8A OS=Mus musculus GN=Rbm8a IPI>Q9CWZ3>S56>RNA-binding protein 8A IPI>Q9CWZ3-2>S56>Isoform 2 of RNA-binding protein 8A IPI>IPI00109860.3>S56>Rbm8a Isoform 2 of RNA-binding protein 8A IPI>IPI00410937.1>S56>Rbm8a Isoform 1 of RNA-binding protein 8A IPI…	R.MREDYDS*VEQDGDEPGPQR.S	S56	UNI:Q9CWZ3	2.68033	0.0317192	446308	446308	60073	1119404	352579	253174	166512	14561	342104	109433	199950	768.302	0.308742	27.22	15.7214	0.520828	3	0		251757447	RecName: Full=RNA-binding protein 8A; AltName: Full=RNA-binding motif protein 8A; AltName: Full=Ribonucleoprotein RBM8A [MASS=19888]	Q9CWZ3	RBM8A_MOUSE	05609_1	379451	0.308742	F	27.22	nucleus	transport	nucleotide binding protein binding	Spliceosome
1958781	Cytosolic phospholipase A2	Manual Assigned Name:Cytosolic phospholipase A2 SwissPROT>PA24A_MOUSE>S437>Cytosolic phospholipase A2 OS=Mus musculus GN=Pla2g4a SwissPROT>Q9DBX5_MOUSE>S429>Putative uncharacterized protein OS=Mus musculus GN=Pla2g4a IPI>P47713>S437>Cytosolic phospholipase A2 IPI>IPI00111169.1>S437>Pla2g4a Cytosolic phospholipase A2 IPI>Q9DBX5>S437>Uncharacterized protein IPI>IPI00751863.1>S437>Pla2g4a Putative u…	K.HIVSNDSSDS*DDEAQGPK.G	S437*	UNI:P47713	2.59038	0.0230352	3.02596e+06	3.02596e+06	2108018	3242324	3695150	3058359	1.16815e+06	1067400	1232272	983931	1389010	660.932	0.00656307	70.03	49.1569	0.976806	3	0		1352708	Cytosolic phospholipase A2 (CPLA2) [Includes: Phospholipase A2 (Phosphatidylcholine 2-acylhydrolase); Lysophospholipase ]	P47713	Q9DBX5_MOUSE		385887	0.00656307	F	70.03	nucleus	metabolic process	calcium ion binding phospholipase A2 activity phospholipase activity	Glycerophospholipid metabolism Arachidonic acid metabolism Linoleic acid metabolism alpha-Linolenic acid metabolism Ether lipid metabolism Vascular smooth muscle contraction VEGF signaling pathway Fc epsilon RI signaling pathway MAPK signaling pathway Long-term depression GnRH signaling pathway
1959485	SAM domain and HD domain-containing protein 1	Manual Assigned Name:SAM domain and HD domain-containing protein 1 SwissPROT>E0CXZ5_MOUSE>T21T29>Uncharacterized protein OS=Mus musculus GN=Samhd1 SwissPROT>Q3TCJ7_MOUSE>T21T29>Putative uncharacterized protein OS=Mus musculus GN=Samhd1 SwissPROT>Q8C5C0_MOUSE>T21T29>Putative uncharacterized protein OS=Mus musculus GN=Samhd1 SwissPROT>SAMH1_MOUSE>T21T29>SAM domain and HD domain-containing protein 1…	R.T*PPSTPPAT*ANLSADDDFQNTDLR.T	T21T29	UNI:Q60710	2.58444	0.022144	1.29666e+07	1.29666e+07	11069901	23415558	13136421	4244629	5.01719e+06	4469126	7910366	5230508	2458759	1352.56	0.165673	34.05	7.007	0.6913	2	0		22261823	SAM domain and HD domain-containing protein 1 (Interferon-gamma inducible protein Mg11)	Q60710	SAMH1_MOUSE		383230	0.165673	F	34.05	nucleus extracellular space	immune response carbohydrate metabolic process	catalytic activity
1959843	SAM domain and HD domain-containing protein 1	Manual Assigned Name:SAM domain and HD domain-containing protein 1 SwissPROT>E0CXZ5_MOUSE>T21S24>Uncharacterized protein OS=Mus musculus GN=Samhd1 SwissPROT>Q3TCJ7_MOUSE>T21S24>Putative uncharacterized protein OS=Mus musculus GN=Samhd1 SwissPROT>Q8C5C0_MOUSE>T21S24>Putative uncharacterized protein OS=Mus musculus GN=Samhd1 SwissPROT>SAMH1_MOUSE>T21S24>SAM domain and HD domain-containing protein 1…	R.T*PPS*TPPATANLSADDDFQNTDLR.T	T21S24	UNI:Q60710	2.58444	0.022144	1.29666e+07	1.29666e+07	11069901	23415558	13136421	4244629	5.01719e+06	4469126	7910366	5230508	2458759	1352.56	0.435632	37.89	25.4848	0.612883	2	0		22261823	SAM domain and HD domain-containing protein 1 (Interferon-gamma inducible protein Mg11)	Q60710	SAMH1_MOUSE		383230	0.435632	F	37.89	nucleus extracellular space	immune response carbohydrate metabolic process	catalytic activity
1958626	MCG10050	Manual Assigned Name:MCG10050 HPRD>01611_1>S104>Ribosomal protein, large, P1 HPRD>01611_2>S79>Ribosomal protein, large, P1 HPRD>01612_1>S105>Ribosomal phosphoprotein large P2 SwissPROT>RLA2_MOUSE>S105>60S acidic ribosomal protein P2 OS=Mus musculus GN=Rplp2 IPI>G3UW69>S105> IPI>P99027>S105>60S acidic ribosomal protein P2 IPI>IPI00139795.2>S105>Rplp2 60S acidic ribosomal protein P2 IPI>IPI00742383…	K.KEESEES*DDDMGFGLFD.-	S105	UNI:G3UW69	2.46206	0.0246184	2.24535e+07	2.24535e+07	9418996	33624985	46758514	11459	9.11979e+06	5682149	16997843	13794147	5028	1015.37	1.0829	42.16	34.3832	0.96516	2	0		46397855	60S acidic ribosomal protein P2	G3UW69	RLA2_MOUSE	01612_1	389649	0.481838	F	42.16	cytoplasm intracellular	translation translational elongation	protein binding structural constituent of ribosome RNA binding	Ribosome
1960000	Catenin beta-1	Manual Assigned Name:Catenin beta-1 HPRD>00286_1>T556>Catenin beta HPRD>00286_2>T556>Catenin beta HPRD>00286_3>T556>Catenin beta SwissPROT>CTNB1_MOUSE>T556>Catenin beta-1 OS=Mus musculus GN=Ctnnb1 IPI>Q02248>T556>Catenin beta-1 IPI>IPI00125899.1>T556>Ctnnb1 Catenin beta-1 IPI>F7CRC6>T556>Uncharacterized protein (Fragment) IPI>IPI00753025.1>T556>Ctnnb1 Adult male pituitary gland cDNA, RIKEN full-l…	R.RTSMGGT*QQQFVEGVR.M	T556*	UNI:Q02248	2.43272	0.0440881	4.02472e+06	4.02472e+06	1164658	3903198	3691600	7339440	1.65441e+06	813728	1352326	419595	4032004	627.626	1.86032	36.37	3.0553	0.743212	3	0		399310	Beta-catenin	Q02248	CTNB1_MOUSE	00286_3	370549	1.86032	F	36.37	nucleus	regulation of transcription, DNA-dependent intracellular signaling cascade	protein binding binding	Wnt signaling pathway Melanogenesis Pathways in cancer Basal cell carcinoma Focal adhesion Leukocyte transendothelial migration Colorectal cancer Endometrial cancer Prostate cancer Tight junction Adherens junction Pathogenic Escherichia coli infection Thyroid cancer Arrhythmogenic right ventricular cardiomyopathy (ARVC)
1960005	Interferon-activable protein 204	Manual Assigned Name:Interferon-activable protein 204 SwissPROT>IFI4_MOUSE>Isoform 2 of Interferon-activable protein 204 OS=Mus musculus GN=Ifi204 SwissPROT>IFI5_MOUSE>Interferon-activatable protein 205 (IFI-205) (D3 protein) SwissPROT>IFI5B_MOUSE>Interferon-activable protein 205-B OS=Mus musculus GN=Ifi205b IPI>P15092>Interferon-activable protein 204 IPI>Q08619>Interferon-activable protein 205-B…	K.NGQEAGPAT*PTSTTSHMLASER.G	T106	UNI:P15092	2.3466	0.0331635	7.91192e+06	7.91192e+06	4988855	9671203	9891354	7096279	3.37165e+06	1485373	3199419	2818506	5983298	775.006	0.988806	23.97	36.7575	0.774394	3	0		166214952	Interferon-activable protein 205-B (Interferon-inducible protein p205-B) (Ifi-205-B) (Myeloid cell nuclear differentiation antigen) (Protein D3)	P15092	IFI4_MOUSE		370703	0.988806	F	23.97	nucleus	regulation of transcription	protein binding
1958844	Integrator complex subunit 1	Manual Assigned Name:Integrator complex subunit 1 SwissPROT>INT1_MOUSE>T1321S1328>Integrator complex subunit 1 OS=Mus musculus GN=Ints1 IPI>Q6P4S8>T1321S1328>Integrator complex subunit 1 IPI>IPI00877221.2>T1321S1328>Ints1 integrator complex subunit 1 NCBI>166214944>T1321S1328>Integrator complex subunit 1 (Int1) [MASS=245166] NCBI>294832004>T1348S1355>integrator complex subunit 1 [Mus musculus] NC…	R.RDST*EAPKPES*SPEPPPGQGR.T	T1321S1328	UNI:Q6P4S8	2.34609	0.0246184	491370	491370	340279	500027	663445	461728	209442	148815	125324	325196	238432	793.672	0.496427	23.59	15.1933	0.695515	3	0		166214944	Integrator complex subunit 1 (Int1) [MASS=245166]	Q6P4S8	INT1_MOUSE		386405	0.496427	F	23.59	integral to membrane	negative regulation of apoptosis	protein binding
1959621	Integrator complex subunit 1	Manual Assigned Name:Integrator complex subunit 1 SwissPROT>INT1_MOUSE>S1320S1328>Integrator complex subunit 1 OS=Mus musculus GN=Ints1 IPI>Q6P4S8>S1320S1328>Integrator complex subunit 1 IPI>IPI00877221.2>S1320S1328>Ints1 integrator complex subunit 1 NCBI>166214944>S1320S1328>Integrator complex subunit 1 (Int1) [MASS=245166] NCBI>294832004>S1347S1355>integrator complex subunit 1 [Mus musculus] NC…	R.RDS*TEAPKPES*SPEPPPGQGR.T	S1320S1328	UNI:Q6P4S8	2.34609	0.0246184	491370	491370	340279	500027	663445	461728	209442	148815	125324	325196	238432	793.671	0.652795	26.21	17.3232	0.45244	3	0		166214944	Integrator complex subunit 1 (Int1) [MASS=245166]	Q6P4S8	INT1_MOUSE		386405	0.652795	F	26.21	integral to membrane	negative regulation of apoptosis	protein binding
1959623	Integrator complex subunit 1	Manual Assigned Name:Integrator complex subunit 1 SwissPROT>INT1_MOUSE>T1321S1329>Integrator complex subunit 1 OS=Mus musculus GN=Ints1 IPI>Q6P4S8>T1321S1329>Integrator complex subunit 1 IPI>IPI00877221.2>T1321S1329>Ints1 integrator complex subunit 1 NCBI>166214944>T1321S1329>Integrator complex subunit 1 (Int1) [MASS=245166] NCBI>294832004>T1348S1356>integrator complex subunit 1 [Mus musculus] NC…	R.RDST*EAPKPESS*PEPPPGQGR.T	T1321S1329	UNI:Q6P4S8	2.34609	0.0246184	491370	491370	340279	500027	663445	461728	209442	148815	125324	325196	238432	803.015	0.282921	25.62	3.1607	0.700988	3	0		166214944	Integrator complex subunit 1 (Int1) [MASS=245166]	Q6P4S8	INT1_MOUSE		386405	0.282921	F	25.62	integral to membrane	negative regulation of apoptosis	protein binding
1958776	Serine/arginine repetitive matrix 1	Manual Assigned Name:Serine/arginine repetitive matrix 1 HPRD>10441_1>S605S607>Serine arginine repetitive matrix protein 1 SwissPROT>A2A8V8_MOUSE>S610S612>Serine/arginine repetitive matrix 1 OS=Mus musculus GN=Srrm1 SwissPROT>A2A8V9_MOUSE>S619S621>Serine/arginine repetitive matrix 1 OS=Mus musculus GN=Srrm1 SwissPROT>A2A8W1_MOUSE>S69S71>Serine/arginine repetitive matrix 1 (Fragment) OS=Mus muscul…	R.RYS*PS*PPPK.R	S610S612*	UNI:A2A8V8	2.27992	0.0312601	4.39445e+06	4.39445e+06	2300471	5616287	6680044	2981016	1.92746e+06	1123207	2046829	2189792	2350021	594.746	0.472871	20.57	35.7498	0.609905	2	0		347595715	RecName: Full=Serine/arginine repetitive matrix protein 1; AltName: Full=Plenty-of-prolines 101	A2A8V8	SRRM1_MOUSE	10441_1	375402	0.472871	F	20.57	nucleus spliceosomal complex	mRNA processing	DNA binding protein binding lysophospholipase activity zinc ion binding
1960051	H-2 class I histocompatibility antigen, L-D alpha chain	Manual Assigned Name:H-2 class I histocompatibility antigen, L-D alpha chain SwissPROT>HA11_MOUSE>"H-2 class I histocompatibility antigen, D-B alpha chain OS=Mus musculus GN=H2-D1" SwissPROT>HA1L_MOUSE>"H-2 class I histocompatibility antigen, L-D alpha chain OS=Mus musculus GN=H2-L" SwissPROT>HA1Z_MOUSE>"H-2 class I histocompatibility antigen, alpha chain (Fragment) OS=Mus musculus" SwissPROT>Q61…	K.GGDYALAPGSQSS*EMS*LR.D	S353S356	UNI:P01897	2.25974	0.0292519	1.97002e+07	1.97002e+07	9190062	20961980	19026156	29622649	8.71791e+06	1903933	6130848	6061890	20774964	998.392	1.49917	27.96	17.354	0.886699	2	0		122183	H-2 CLASS I HISTOCOMPATIBILITY ANTIGEN, ALPHA CHAIN (CLONE PH-2D-2)	P01897	HA1L_MOUSE		386217	1.49917	F	27.96	integral to membrane	immune response	protein binding peptide antigen binding calcium ion binding receptor activity heparan sulfate proteoglycan binding	Autoimmune thyroid disease Endocytosis Natural killer cell mediated cytotoxicity Type I diabetes mellitus Allograft rejection Graft-versus-host disease Antigen processing and presentation Viral myocarditis Cell adhesion molecules (CAMs)
1959777	Protein PAT1 homolog 1	Manual Assigned Name:Protein PAT1 homolog 1 HPRD>08214_1>S36>FLJ36874 protein SwissPROT>PATL1_MOUSE>S179>Protein PAT1 homolog 1 OS=Mus musculus GN=Patl1 IPI>Q3TC46>S179>Protein PAT1 homolog 1 IPI>IPI00309059.7>S179>Patl1 Protein PAT1 homolog 1 NCBI>187608835>S179>Protein PAT1 homolog 1 (PAT1-like protein 1) NCBI>37589200>S179>Expressed sequence AV312086 [Mus musculus] [MASS=86769] NCBI>255522964>…	R.STS*PIIGSPPVR.A	S179*	UNI:Q3TC46	2.24815	0.012029	6.92046e+06	6.92046e+06	9038838	7468001	6379700	4795307	3.07829e+06	3394088	3920234	2702494	2296324	645.827	1.30012	35.45	7.59668	0.810237	2	0		187608835	Protein PAT1 homolog 1 (PAT1-like protein 1)	Q3TC46	PATL1_MOUSE	08214_1	383395	1.30012	F	35.45	cytoplasm membrane	response to wounding multicellular organismal development	calcium ion binding protein binding isomerase activity	RNA degradation
1959415	MARCKS-related protein	Manual Assigned Name:MARCKS-related protein HPRD>04247_1>S104>MARCKS like protein SwissPROT>MRP_MOUSE>S104>MARCKS-related protein OS=Mus musculus GN=Marcksl1 IPI>P28667>S104>MARCKS-related protein IPI>IPI00281011.7>S104>Marcksl1 MARCKS-related protein NCBI>114930>S104>MARCKS-related protein (Macrophage myristoylated alanine-rich C kinase substrate) (Mac-MARCKS) (MacMARCKS) (Brain protein F52) NCB…	K.LSGLS*FK.R	S104*	UNI:P28667	2.24338	0.0492366	7.95065e+06	7.95065e+06	5316787	15432400	8136411	2917005	3.54405e+06	2728211	5314356	2822439	3311202	416.204	0.129901	31.87	58.0215	0.795725	2	0		114930	MARCKS-related protein (Macrophage myristoylated alanine-rich C kinase substrate) (Mac-MARCKS) (MacMARCKS) (Brain protein F52)	P28667	MRP_MOUSE	04247_1	382208	0.129901	F	31.87	plasma membrane	vesicle-mediated transport	calmodulin binding	Fc gamma R-mediated phagocytosis Leishmania infection
1959845	SAM domain and HD domain-containing protein 1	Manual Assigned Name:SAM domain and HD domain-containing protein 1 SwissPROT>E0CXZ5_MOUSE>S24T25>Uncharacterized protein OS=Mus musculus GN=Samhd1 SwissPROT>Q3TCJ7_MOUSE>S24T25>Putative uncharacterized protein OS=Mus musculus GN=Samhd1 SwissPROT>Q8C5C0_MOUSE>S24T25>Putative uncharacterized protein OS=Mus musculus GN=Samhd1 SwissPROT>SAMH1_MOUSE>S24T25>SAM domain and HD domain-containing protein 1…	R.TPPS*T*PPATANLSADDDFQNTDLR.T	S24T25	UNI:Q60710	2.22358	0.0397405	2.43623e+07	2.43623e+07	17833321	45918703	25667516	8029624	1.09563e+07	7256060	17115562	11317808	8135895	902.045	1.40045	21.61		0.336198	3	0		22261823	SAM domain and HD domain-containing protein 1 (Interferon-gamma inducible protein Mg11)	Q60710	SAMH1_MOUSE		383230	1.40045	F	21.61	nucleus extracellular space	immune response carbohydrate metabolic process	catalytic activity
1959246	Nucleolar protein 58	Manual Assigned Name:Nucleolar protein 58 SwissPROT>NOP58_MOUSE>S509S521>Nucleolar protein 58 OS=Mus musculus GN=Nop58 IPI>Q6DFW4>S509S521>Nucleolar protein 58 IPI>IPI00463468.3>S509S521>Nop58 Nucleolar protein 58 NCBI>49901389>S509S521>Nol5 protein [Mus musculus] [MASS=60343] NCBI>148667719>S509S521>nucleolar protein 5, isoform CRA_b [Mus musculus] [MASS=60343] NCBI>148667718>S446S458>nucleolar …	K.HIKEEPLS*EEEPCTSTAVPS*PEK.K	S509S521*	UNI:Q6DFW4	2.17332	0.0366099	4.71546e+06	4.71546e+06	1596218	7053234	7499307	2713081	2.1697e+06	737192	2416848	3007341	2517417	924.069	0.959861	31.51	27.4381	0.862977	3	0		49901389	Nol5 protein [Mus musculus] [MASS=60343]	Q6DFW4	NOP58_MOUSE		374089	0.959861	F	31.51	nucleus	ribosome biogenesis	protein binding
1959129	AP-3 complex subunit delta-1	Manual Assigned Name:AP-3 complex subunit delta-1 SwissPROT>AP3D1_MOUSE>T758S760>AP-3 complex subunit delta-1 OS=Mus musculus GN=Ap3d1 IPI>O54774>T758S760>AP-3 complex subunit delta-1 IPI>IPI00117811.3>T758S760>Ap3d1 AP-3 complex subunit delta-1 NCBI>81882150>T758S760>AP-3 complex subunit delta-1 (Adapter-related protein complex 3 subunit delta-1) (AP-3 complex subunit delta) (Delta-adaptin) (mBL…	R.RHSSLPT*ES*DEDIAPAQR.V	T758S760*	UNI:O54774	2.09278	0.0230352	3.54931e+06	3.54931e+06	4445294	4044870	3278765	2428314	1.69598e+06	2119063	2360188	1506865	797792	730.311	0.761563	23.08	13.3641	0.847589	3	0		81882150	AP-3 complex subunit delta-1 (Adapter-related protein complex 3 subunit delta-1) (AP-3 complex subunit delta) (Delta-adaptin) (mBLVR1)	O54774	AP3D1_MOUSE		371766	0.34629	F	23.08	membrane Golgi apparatus	transport protein transport	protein binding	Lysosome
1959727	AP-3 complex subunit delta-1	Manual Assigned Name:AP-3 complex subunit delta-1 SwissPROT>AP3D1_MOUSE>S755S760>AP-3 complex subunit delta-1 OS=Mus musculus GN=Ap3d1 IPI>O54774>S755S760>AP-3 complex subunit delta-1 IPI>IPI00117811.3>S755S760>Ap3d1 AP-3 complex subunit delta-1 NCBI>81882150>S755S760>AP-3 complex subunit delta-1 (Adapter-related protein complex 3 subunit delta-1) (AP-3 complex subunit delta) (Delta-adaptin) (mBL…	R.RHSS*LPTES*DEDIAPAQR.V	S755S760*	UNI:O54774	2.09278	0.0230352	3.54931e+06	3.54931e+06	4445294	4044870	3278765	2428314	1.69598e+06	2119063	2360188	1506865	797792	730.31	0.740549	31.42	24.3496	0.775267	3	0		81882150	AP-3 complex subunit delta-1 (Adapter-related protein complex 3 subunit delta-1) (AP-3 complex subunit delta) (Delta-adaptin) (mBLVR1)	O54774	AP3D1_MOUSE		371766	0.740549	F	31.42	membrane Golgi apparatus	transport protein transport	protein binding	Lysosome
1960334	Nuclear factor 1 B-type	Manual Assigned Name:Nuclear factor 1 B-type SwissPROT>NFIB_MOUSE>S328>Isoform 3 of Nuclear factor 1 B-type OS=Mus musculus GN=Nfib SwissPROT>Q8BN68_MOUSE>S328>Nuclear factor 1 OS=Mus musculus GN=Nfib IPI>P97863>S328>Nuclear factor 1 B-type IPI>P97863-2>S328>Isoform 2 of Nuclear factor 1 B-type IPI>P97863-3>S328>Isoform 3 of Nuclear factor 1 B-type IPI>IPI00130129.1>S328>Nfib Isoform 1 of Nuclear…	K.KPEKPLFSSTS*PQDSSPR.L	S328	UNI:P97863	2.03458	0.0461343	4.84956e+06	4.84956e+06	2326854	6742957	7821938	2506510	2.38357e+06	1965445	3120460	2476392	1971964	689.997	0.791595	24.5	13.4324	0.622559	3	0		14195676	Nuclear factor 1 B-type (Nuclear factor 1/B) (NF1-B) (NFI-B) (NF-I/B) (CCAAT-box binding transcription factor) (CTF) (TGGCA-binding protein)	P97863	Q8BN68_MOUSE		387336	0.791595	F	24.5	nucleus	regulation of transcription, DNA-dependent	DNA binding
1958916	Drebrin-like protein	Manual Assigned Name:Drebrin-like protein SwissPROT>DBNL_MOUSE>S273>Isoform 3 of Drebrin-like protein OS=Mus musculus GN=Dbnl IPI>Q62418>S277>Drebrin-like protein IPI>Q62418-2>S277>Isoform 2 of Drebrin-like protein IPI>Q62418-3>S277>Isoform 3 of Drebrin-like protein IPI>IPI00308222.3>S277>Dbnl Isoform 2 of Drebrin-like protein IPI>IPI00378015.1>S277>Dbnl Isoform 1 of Drebrin-like protein IPI>IPI0…	R.AMS*TTSVTSSQPGK.L	S277	UNI:Q62418	1.98359	0.0230352	1.87413e+06	1.87413e+06	1630632	2563175	1741451	1561249	944818	711790	1165383	826777	1075322	731.318	0.103994	71.78	27.6042	0.899629	2	0		51315842	Drebrin-like protein (SH3 domain-containing protein 7) (Actin-binding protein 1) [MASS=48699]	Q62418	DBNL_MOUSE		371900	0.103994	F	71.78	cytoplasm	immune response	protein binding
1959230	Tight junction-associated protein 1	Manual Assigned Name:Tight junction-associated protein 1 SwissPROT>TJAP1_MOUSE>S527>Tight junction-associated protein 1 OS=Mus musculus GN=Tjap1 IPI>Q9DCD5>S527>Tight junction-associated protein 1 IPI>IPI00461642.2>S527>Tjap1 Tight junction-associated protein 1 NCBI>78099268>S527>Tight junction-associated protein 1 (Tight junction protein 4) (Protein incorporated later into tight junctions) NCBI>…	R.KDS*LTQAQEQGTVLS.-	S527	UNI:Q9DCD5	1.98146	0.0230352	4.62292e+06	4.62292e+06	4892850	4087481	3004877	6506472	2.33309e+06	2771724	2338792	1664219	2557613	842.893	0.404801	54.82	13.9358	0.91281	2	0		78099268	Tight junction-associated protein 1 (Tight junction protein 4) (Protein incorporated later into tight junctions)	Q9DCD5	TJAP1_MOUSE		391148	0.170942	F	54.82	Golgi apparatus	protein amino acid phosphorylation	protein binding	Tight junction
1960224	Microtubule-associated protein	Manual Assigned Name:Microtubule-associated protein IPI>E9PWC0>S609>Microtubule-associated protein IPI>E9PZ43>S609>Microtubule-associated protein IPI>E9QKJ8>S609>Microtubule-associated protein IPI>E9QPW8>S609>Microtubule-associated protein IPI>P27546>S609>Microtubule-associated protein 4 IPI>F7CK47>S609>Microtubule-associated protein (Fragment) IPI>P27546-2>S609>Isoform 2 of Microtubule-associate…	K.RTSPS*KPSSAPALKPGPK.T	S609	UNI:E9PWC0	1.97295	0.0443826	563507	563507	325288	769465	528776	630498	285617	316708	295018	330153	200589	472.252	0.700959	25.75		0.14786	4	0				E9PWC0	E9PWC0_MOUSE		377095	0.700959	F	25.75
1959109	Cap-specific mRNA (nucleoside-2'-O-)-methyltransferase 1	Manual Assigned Name:Cap-specific mRNA (nucleoside-2'-O-)-methyltransferase 1 SwissPROT>D3Z491_MOUSE>S28>Uncharacterized protein OS=Mus musculus GN=Ftsjd2 SwissPROT>MTR1_MOUSE>S28>Cap-specific mRNA (nucleoside-2'-O-)-methyltransferase 1 OS=Mus musculus GN=Ftsjd2 IPI>Q9DBC3>S28>Cap-specific mRNA (nucleoside-2'-O-)-methyltransferase 1 IPI>IPI00459652.3>S28>Ftsjd2 Cap-specific mRNA (nucleoside-2'-O-…	R.HLSS*TSDDEPLSSVNHAAK.A	S28	UNI:Q9DBC3	1.94671	0.0342506	5.02141e+06	5.02141e+06	4390155	6392511	5629453	3673510	2.57943e+06	1828373	3237439	2049723	3202191	692.307	0.858834	24.72	7.79356	0.929339	3	0		81906080	Uncharacterized protein KIAA0082	Q9DBC3	MTR1_MOUSE		373236	0.858834	F	24.72	nucleus	methylation	protein binding
1958984	Cobl-like 1	Manual Assigned Name:Cobl-like 1 SwissPROT>B1AZ14_MOUSE>S864>Cobl-like 1 OS=Mus musculus GN=Cobll1 SwissPROT>B1AZ15_MOUSE>S863>Cobl-like 1 OS=Mus musculus GN=Cobll1 SwissPROT>COBL1_MOUSE>S826>Isoform 4 of Cordon-bleu protein-like 1 OS=Mus musculus GN=Cobll1 IPI>B1AZ14>S864>Cobl-like 1 IPI>B1AZ15>S864>Cobl-like 1 IPI>Q3UMF0>S864>Cordon-bleu protein-like 1 IPI>Q3UMF0-2>S864>Isoform 2 of Cordon-bleu…	R.TLS*SPTGTETNPPK.A	S864	UNI:B1AZ14	1.91607	0.0230352	1.22111e+06	1.22111e+06	720306	1547809	1889293	727023	637297	478043	738166	1016318	316659	755.345	0.0609399	79.72	15.1851	0.936681	2	0		118568015	Cordon-bleu protein-like 1 (Cobl-related protein 1) [MASS=137381]	B1AZ14	COBL1_MOUSE		386496	0.0609399	F	79.72
1958932	Na(+)/H(+) exchange regulatory cofactor NHE-RF1	Manual Assigned Name:Na(+)/H(+) exchange regulatory cofactor NHE-RF1 SwissPROT>NHERF_MOUSE>T287>Ezrin-radixin-moesin binding phosphoprotein 50 (EBP50) (Na(+)/H(+) exchange regulatory cofactor NHE-RF) (NHERF-1) (Regulatory cofactor of Na(+)/H(+) exchanger) (Sodium-hydrogen exchanger regulatory factor 1) (Solute carrier family 9 IPI>P70441>T288>Na(+)/H(+) exchange regulatory cofactor NHE-RF1 IPI>IP…	R.SASSDT*SEELNSQDSPK.R	T288*	UNI:P70441	1.91302	0.0201463	1.60215e+06	1.60215e+06	855318	2527626	1917689	1107955	837497	338108	1369343	1118472	524067	621.25	0.273401	48.39	3.62482	0.914602	3	0		41688568	Ezrin-radixin-moesin binding phosphoprotein 50 (EBP50) (Na(+)/H(+) exchange regulatory cofactor NHE-RF) (NHERF-1) (Regulatory cofactor of Na(+)/H(+) exchanger) (Sodium-hydrogen exchanger regulatory factor 1) (Solute carrier family 9 isoform 3 regulatory factor 1)	P70441	NHERF_MOUSE		372022	0.119781	F	48.39	membrane	Wnt receptor signaling pathway	protein binding
1958934	Na(+)/H(+) exchange regulatory cofactor NHE-RF1	Manual Assigned Name:Na(+)/H(+) exchange regulatory cofactor NHE-RF1 SwissPROT>NHERF_MOUSE>S282>Ezrin-radixin-moesin binding phosphoprotein 50 (EBP50) (Na(+)/H(+) exchange regulatory cofactor NHE-RF) (NHERF-1) (Regulatory cofactor of Na(+)/H(+) exchanger) (Sodium-hydrogen exchanger regulatory factor 1) (Solute carrier family 9 IPI>P70441>S283>Na(+)/H(+) exchange regulatory cofactor NHE-RF1 IPI>IP…	R.S*ASSDTSEELNSQDSPK.R	S283*	UNI:P70441	1.91302	0.0201463	1.60215e+06	1.60215e+06	855318	2527626	1917689	1107955	837497	338108	1369343	1118472	524067	623.921	0.241744	30.78	8.23909	0.86611	3	0		41688568	Ezrin-radixin-moesin binding phosphoprotein 50 (EBP50) (Na(+)/H(+) exchange regulatory cofactor NHE-RF) (NHERF-1) (Regulatory cofactor of Na(+)/H(+) exchanger) (Sodium-hydrogen exchanger regulatory factor 1) (Solute carrier family 9 isoform 3 regulatory factor 1)	P70441	NHERF_MOUSE		372022	0.0492045	F	30.78	membrane	Wnt receptor signaling pathway	protein binding
1960142	Autophagy-related protein 16-1	Manual Assigned Name:Autophagy-related protein 16-1 HPRD>16498_2>S269>APG16L SwissPROT>APG16_MOUSE>S269>Autophagy protein 16-like (APG16-like) IPI>Q8C0J2>S269>Autophagy-related protein 16-1 IPI>IPI00223832.1>S269>Atg16l1 Isoform 1 of Autophagy-related protein 16-1 NCBI>62510494>S269>Autophagy protein 16-like (APG16-like) NCBI>27552519>S269>Apg16L beta [Mus musculus] NCBI>148708199>S269>autophagy-…	K.RLS*QPAGGLLDSITNIFGR.R	S269	UNI:Q8C0J2	1.91268	0.0342506	714017	714017	1160125	689908	292019		373307	622820	394203	102898		699.029	1.36463	28.72	10.229	0.555527	3	0		62510494	Autophagy protein 16-like (APG16-like)	Q8C0J2	APG16_MOUSE	16498_2		1.36463	F	28.72	membrane	transport	protein binding
1960209	Cobl-like 1	Manual Assigned Name:Cobl-like 1 SwissPROT>B1AZ14_MOUSE>S281>Cobl-like 1 OS=Mus musculus GN=Cobll1 SwissPROT>B1AZ15_MOUSE>S281>Cobl-like 1 OS=Mus musculus GN=Cobll1 SwissPROT>B1AZ26_MOUSE>S314>Cobl-like 1 (Fragment) OS=Mus musculus GN=Cobll1 SwissPROT>COBL1_MOUSE>S281>Isoform 4 of Cordon-bleu protein-like 1 OS=Mus musculus GN=Cobll1 IPI>B1AZ14>S281>Cobl-like 1 IPI>B1AZ15>S281>Cobl-like 1 IPI>B1AZ…	K.HRPS*FTR.S	S281	UNI:B1AZ14	1.88557	0.0387358	226746	226746	688556	62992	33629	121806	120253	356705	33547	33123	57637	334.159	0.268876	21.1	25.4411	0.569334	3	0		118568015	Cordon-bleu protein-like 1 (Cobl-related protein 1) [MASS=137381]	B1AZ14	COBL1_MOUSE		386496	0.268876	F	21.1
1958685	Protein PRRC2C	Manual Assigned Name:Protein PRRC2C SwissPROT>BA2L2_MOUSE>S902>Isoform 5 of Protein BAT2-like 2 OS=Mus musculus GN=Bat2l2 SwissPROT>D3Z3U3_MOUSE>S87>Uncharacterized protein OS=Mus musculus GN=Bat2l2 IPI>Q3TLH4>S902>Protein PRRC2C IPI>Q3TLH4-2>S902>Isoform 2 of Protein PRRC2C IPI>Q3TLH4-3>S902>Isoform 3 of Protein PRRC2C IPI>Q3TLH4-5>S902>Isoform 5 of Protein PRRC2C IPI>IPI00330171.7>S902>Bat2l2 B…	R.SVSHGS*NHAQNAEEQR.N	S902*	UNI:Q3TLH4	1.86923	0.0285086	1.33902e+06	1.33902e+06	937378	1399753	1648993	1369963	716349	330037	655620	820123	1059618	614.258	0.462309	41.89	5.2652	0.885178	3	0		205688689	RecName: Full=BAT2 domain-containing protein 1 [MASS=308902]	Q3TLH4	D3Z3U3_MOUSE			0.462309	F	41.89
1959567	Protein PRRC2C	Manual Assigned Name:Protein PRRC2C SwissPROT>BA2L2_MOUSE>S897>Isoform 5 of Protein BAT2-like 2 OS=Mus musculus GN=Bat2l2 SwissPROT>D3Z3U3_MOUSE>S82>Uncharacterized protein OS=Mus musculus GN=Bat2l2 IPI>Q3TLH4>S897>Protein PRRC2C IPI>Q3TLH4-2>S897>Isoform 2 of Protein PRRC2C IPI>Q3TLH4-3>S897>Isoform 3 of Protein PRRC2C IPI>Q3TLH4-5>S897>Isoform 5 of Protein PRRC2C IPI>IPI00330171.7>S897>Bat2l2 B…	R.S*VSHGSNHAQNAEEQR.N	S897*	UNI:Q3TLH4	1.86923	0.0285086	1.33902e+06	1.33902e+06	937378	1399753	1648993	1369963	716349	330037	655620	820123	1059618	610.921	1.51359	30.3	35.1415	0.910576	3	0		205688689	RecName: Full=BAT2 domain-containing protein 1 [MASS=308902]	Q3TLH4	D3Z3U3_MOUSE			0.21412	F	30.3
1958850	DNA-binding protein A	Manual Assigned Name:DNA-binding protein A SwissPROT>DBPA_MOUSE>S259>Isoform 2 of DNA-binding protein A OS=Mus musculus GN=Csda SwissPROT>Q64369_MOUSE>S244>Y-box binding protein (Fragment) OS=Mus musculus GN=Csda SwissPROT>Q68G78_MOUSE>S259>Csda protein OS=Mus musculus GN=Csda IPI>Q9JKB3>S328>DNA-binding protein A IPI>Q9JKB3-2>S328>Isoform 2 of DNA-binding protein A IPI>IPI00274739.1>S328>Csda Is…	R.S*RPLNAVSQDGK.E	S328	UNI:Q9JKB3	1.86794	0.0342506	7.62616e+06	7.62616e+06	7690829	8780947	8244746	5788124	4.08266e+06	2650089	4125360	4843621	4711587	451.217	0.0525289	24.79	46.0316	0.7129	3	0		61212920	DNA-binding protein A (Cold shock domain protein A) (Y-box protein 3) [MASS=38813]	Q9JKB3	Q68G78_MOUSE		376036	0.0525289	F	24.79	nucleus integral to membrane	regulation of transcription, DNA-dependent	protein binding DNA binding	Tight junction
1960470	ADP-ribosylation factor GTPase-activating protein 2	Manual Assigned Name:ADP-ribosylation factor GTPase-activating protein 2 HPRD>06069_1>Zinc finger protein 289, ID1 regulated SwissPROT>ARFG2_MOUSE>Isoform 2 of ADP-ribosylation factor GTPase-activating protein 2 OS=Mus musculus GN=Arfgap2 IPI>Q99K28>ADP-ribosylation factor GTPase-activating protein 2 IPI>Q99K28-2>Isoform 2 of ADP-ribosylation factor GTPase-activating protein 2 IPI>IPI00109656.2>A…	K.AIS*SDMFFGR.E	S431	UNI:Q99K28	1.86781	0.0366099	3.41149e+06	3.41149e+06	3351233	4040600	2842634		1.82646e+06	1296316	2548349	1634722		605.752	1.13837	59.41	39.9127	0.974609	2	0		81880083	ADP-ribosylation factor GTPase-activating protein 2 (ARF GAP 2) (GTPase-activating protein ZNF289) (Zinc finger protein 289)	Q99K28	ARFG2_MOUSE	6069	374639	1.13837	F	59.41	membrane cytoplasm integral to membrane	transport regulation of ARF GTPase activity	zinc ion binding	Endocytosis
1959418	Tumor necrosis factor receptor superfamily member 6	Manual Assigned Name:Tumor necrosis factor receptor superfamily member 6 SwissPROT>D3Z6E5_MOUSE>S220>Uncharacterized protein OS=Mus musculus GN=Fas SwissPROT>Q6GT31_MOUSE>S220>Fas OS=Mus musculus GN=Fas SwissPROT>TNR6_MOUSE>S220>Tumor necrosis factor receptor superfamily member 6 OS=Mus musculus GN=Fas IPI>P25446>S220>Tumor necrosis factor receptor superfamily member 6 IPI>IPI00110896.1>S220>Fas …	R.ETIPMNASNLS*LSK.Y	S220	UNI:P25446	1.86032	0.0184947	4.39399e+06	4.39399e+06	3889168	6649263	3885943	3151574	2.36196e+06	1836334	3711673	1885516	2014309	792.871	0.0265029	26.51	14.6862	0.728741	2	0		342187056	RecName: Full=Tumor necrosis factor receptor superfamily member 6; AltName: Full=Apo-1 antigen; AltName: Full=Apoptosis-mediating surface antigen FAS; AltName: Full=FASLG receptor; AltName: CD_antigen=CD95; Flags: Precursor	P25446	TNR6_MOUSE		373569	0.0265029	F	26.51	integral to membrane	signal transduction	protein binding
1959306	Isoform 2 of ATP-dependent RNA helicase A	Manual Assigned Name:Isoform 2 of ATP-dependent RNA helicase A IPI>O70133-2>Isoform 2 of ATP-dependent RNA helicase A IPI>IPI00339468.4>Dhx9 Isoform 2 of ATP-dependent RNA helicase A IPI>E9QNN1>Uncharacterized protein NCBI>116283679>Dhx9 protein [Mus musculus] [MASS=21770] NCBI>148707489>DEAH (Asp-Glu-Ala-His) box polypeptide 9, isoform CRA_a [Mus musculus] [MASS=131719] NCBI>12850774>unnamed pro…	K.AEAENNSGVESSGYGS*PGPTWDR.G	S137	UNI:O70133-2	1.85822	0.0264414	1.12469e+07	1.12469e+07	6023976	13411027	11521450	14031249	6.05254e+06	4223645	8215536	6272347	5498613	1223.99	0.0948108	71.05	35.3857	0.85373	2	0		116283679	Dhx9 protein [Mus musculus] [MASS=21770]	O70133-2	DHX9_MOUSE			0.0948108	F	71.05
1959115	Serine/threonine-protein kinase TAO3	Manual Assigned Name:Serine/threonine-protein kinase TAO3 SwissPROT>TAOK3_MOUSE>S324>Serine/threonine-protein kinase TAO3 OS=Mus musculus GN=Taok3 IPI>Q8BYC6>S324>Serine/threonine-protein kinase TAO3 IPI>IPI00227043.3>S324>Taok3 Serine/threonine-protein kinase TAO3 IPI>IPI00857040.1>S324>Taok3 Putative uncharacterized protein NCBI>78098987>S324>Serine/threonine-protein kinase TAO3 (Thousand and o…	R.NGPLNES*QEEEEDGEQGSNLNR.E	S324*	UNI:Q8BYC6	1.85799	0.0279031	2.56199e+06	2.56199e+06	1917108	3532783	2738019	2060041	1.37891e+06	1005509	1505080	1351814	1653219	842.34	0.159604	59.07	91.1011	0.968902	3	0		78098987	Serine/threonine-protein kinase TAO3 (Thousand and one amino acid protein 3) [MASS=105335]	Q8BYC6	TAOK3_MOUSE			0.0170297	F	59.07	cytoplasm	protein amino acid phosphorylation	ATP binding	MAPK signaling pathway
1960337	Bcl-2-associated transcription factor 1	Manual Assigned Name:Bcl-2-associated transcription factor 1 HPRD>16544_1>S285S290>BCL2 associated transcription factor 1 HPRD>16544_2>S283S288>BCL2 associated transcription factor 1 HPRD>16544_3>S285S290>BCL2 associated transcription factor 1 SwissPROT>BCLF1_MOUSE>S282S287>Isoform 3 of Bcl-2-associated transcription factor 1 OS=Mus musculus GN=Bclaf1 SwissPROT>Q3UR37_MOUSE>S282S287>Putative unch…	R.YS*PSQNS*PIHHIPSR.R	S284S289*	UNI:Q8K019	1.85086	0.0440881	3.36629e+06	3.36629e+06	3249696	4624393	4914943	676113	1.81877e+06	1905050	2599049	2075680	695283	945.401	1.09642	29.85	12.7109	0.828513	2	0		47605501	Bcl-2-associated transcription factor 1 (Btf) [MASS=106001]	Q8K019	Q3UR37_MOUSE	16544_3	379214	1.09642	F	29.85	nucleus membrane integral to membrane	regulation of transcription negative regulation of transcription	protein binding
1960396	Thrap3 protein	Manual Assigned Name:Thrap3 protein HPRD>07543_1>S928>TRAP150 SwissPROT>Q80VM0_MOUSE>S34>Thrap3 protein OS=Mus musculus GN=Thrap3 SwissPROT>TR150_MOUSE>S924>Thyroid hormone receptor-associated protein 3 OS=Mus musculus GN=Thrap3 IPI>Q80VM0>S34>Thrap3 protein IPI>Q569Z6>S34>Thyroid hormone receptor-associated protein 3 IPI>IPI00556768.1>S34>Thrap3 Thyroid hormone receptor-associated protein 3 IPI>…	K.WAHDKFS*GEEGEIEDDESGTENR.E	S34*	UNI:Q80VM0	1.8467	0.0379721	2.75963e+06	2.75963e+06	1697013	3846703	2220397	3274420	1.49436e+06	1209153	1937510	1722704	1108084	906.359	0.232236	56.83	76.2505	0.865394	3	0		81882407	Thyroid hormone receptor-associated protein 3 (Thyroid hormone receptor-associated protein complex 150 kDa component) (Trap150)	Q80VM0	TR150_MOUSE	07543_1		0.232236	F	56.83	nucleus	regulation of transcription positive regulation of transcription from RNA polymerase II promoter	protein binding ATP binding
1959218	A230067G21Rik protein	Manual Assigned Name:A230067G21Rik protein HPRD>11135_2>S375S376>Chromosome 20 open reading frame 74 SwissPROT>RGPA2_MOUSE>S375S376>Isoform 3 of Ral GTPase-activating protein subunit alpha-2 OS=Mus musculus GN=Ralgapa2 IPI>B2RX86>S375S376>A230067G21Rik protein IPI>A3KGS3>S375S376>Ral GTPase-activating protein subunit alpha-2 IPI>A3KGS3-2>S375S376>Isoform 2 of Ral GTPase-activating protein subunit…	R.RLSNS*S*LCSIEEEHR.T	S375S376	UNI:B2RX86	1.83782	0.0246184	7.69665e+06	7.69665e+06	6226578	8954427	10672726	4932859	4.18792e+06	3207603	4712211	5005919	3825942	659.603	0.74211	28.04	0.87063	0.850277	3	0		147742933	250 kDa substrate of Akt (AS250) [MASS=210287]	B2RX86	RGPA2_MOUSE	11135_2	379158	0.74211	F	28.04	cytoplasm intracellular	regulation of small GTPase mediated signal transduction	GTPase activator activity binding
1959991	A230067G21Rik protein	Manual Assigned Name:A230067G21Rik protein HPRD>11135_2>S373S375>Chromosome 20 open reading frame 74 SwissPROT>RGPA2_MOUSE>S373S375>Isoform 3 of Ral GTPase-activating protein subunit alpha-2 OS=Mus musculus GN=Ralgapa2 IPI>B2RX86>S373S375>A230067G21Rik protein IPI>A3KGS3>S373S375>Ral GTPase-activating protein subunit alpha-2 IPI>A3KGS3-2>S373S375>Isoform 2 of Ral GTPase-activating protein subunit…	R.RLS*NS*SLCSIEEEHR.T	S373S375	UNI:B2RX86	1.83782	0.0246184	7.69665e+06	7.69665e+06	6226578	8954427	10672726	4932859	4.18792e+06	3207603	4712211	5005919	3825942	659.602	0.461353	24.62	11.572	0.902814	3	0		147742933	250 kDa substrate of Akt (AS250) [MASS=210287]	B2RX86	RGPA2_MOUSE	11135_2	379158	0.183631	F	24.62	cytoplasm intracellular	regulation of small GTPase mediated signal transduction	GTPase activator activity binding
1959545	Dclk1 protein	Manual Assigned Name:Dclk1 protein SwissPROT>A8IP62_MOUSE>S45>Activity and neurotransmitter-induced early gene protein 4 OS=Mus musculus GN=Dclk1 SwissPROT>DCLK1_MOUSE>S352>Isoform 2 of Serine/threonine-protein kinase DCLK1 OS=Mus musculus GN=Dclk1 IPI>Q80VB6>S352>Dclk1 protein IPI>Q9JLM8-2>S352>Isoform 2 of Serine/threonine-protein kinase DCLK1 IPI>IPI00761729.1>S352>Dclk1 Isoform 2 of Serine/th…	R.DLYRPLS*SDDLDSVGDSV.-	S352	UNI:Q80VB6	1.83129	0.0479234	8.83706e+06	8.83706e+06	5518409	9728436	12658395	7443020	4.8256e+06	2262465	4178794	4273821	8587309	1021.95	0.845863	32.84	8.22355	0.666298	2	0		158148935	activity and neurotransmitter-induced early gene protein 4 [Mus musculus] [MASS=5913]	Q80VB6	DCLK1_MOUSE			0.845863	F	32.84	integral to membrane integral to plasma membrane	brain development intracellular signaling cascade	guanyl-nucleotide exchange factor activity kinase activity
1959130	Ahnak AHNAK nucleoprotein isoform 1	Manual Assigned Name:Ahnak AHNAK nucleoprotein isoform 1 SwissPROT>Q8BRB8_MOUSE>Putative uncharacterized protein (Fragment) OS=Mus musculus GN=Ahnak IPI>IPI00553798.2>Ahnak AHNAK nucleoprotein isoform 1 IPI>E9Q616>Uncharacterized protein NCBI>61743961>AHNAK nucleoprotein isoform 1 [Mus musculus] [MASS=604249] NCBI>26337133>unnamed protein product [Mus musculus]	R.LRS*EDGVEGDLGETQSR.T	S136	UNI:IPI00553798.2	1.82721	0.0246184	1.14383e+07	1.14383e+07	11293820	16812210	13966371	3680904	6.26001e+06	6113429	7340506	8968264	2617837	649.957	0.173011	46.14	126.022	0.951818	3	0		61743961	AHNAK nucleoprotein isoform 1 [Mus musculus] [MASS=604249]	IPI00553798.2	Q8BRB8_MOUSE			0.173011	F	46.14	mitochondrion	protein amino acid phosphorylation	protein binding
1960066	Hematological and neurological expressed 1 protein	Manual Assigned Name:Hematological and neurological expressed 1 protein SwissPROT>HN1_MOUSE>S87>Hematological and neurological expressed 1 protein OS=Mus musculus GN=Hn1 IPI>P97825>S87>Hematological and neurological expressed 1 protein IPI>IPI00314755.5>S87>Hn1 Hematological and neurological expressed 1 protein NCBI>81882232>S87>Hematological and neurological expressed 1 protein NCBI>148702552>S8…	R.SNS*SEASSGDFLDLK.G	S87*	UNI:P97825	1.82681	0.0246184	3.96805e+06	3.96805e+06	4318167	5079460	2511270	3963299	2.17211e+06	1836216	2634478	1331184	2886579	818.841	0.652543	78.3		0.926479	2	0		81882232	Hematological and neurological expressed 1 protein	P97825	HN1_MOUSE		372026	0.652543	F	78.3	nucleus	regulation of transcription, DNA-dependent immune response	DNA binding metal ion binding
1958671	Pinin	Manual Assigned Name:Pinin SwissPROT>PININ_MOUSE>S380>Pinin OS=Mus musculus GN=Pnn SwissPROT>Q3TUQ5_MOUSE>S381>Pinin OS=Mus musculus GN=Pnn IPI>O35691>S380>Pinin IPI>Q3TUQ5>S380>Pinin IPI>IPI00317891.7>S380>Pnn Pinin IPI>IPI00785231.1>S380>Pnn pinin NCBI>73921751>S380>Pinin [MASS=82435] NCBI>187952777>S381>Pinin [Mus musculus] [MASS=82504] NCBI>124376796>S381>Pinin [Mus musculus] NCBI>27461725>S3…	K.QQDS*QPEEVMDVLEMVESVK.H	S380*	UNI:O35691	1.80946	0.0230352	6.17612e+06	6.17612e+06	4084440	8525604	5918323		3.41325e+06	1992189	4899180	3348372		803.356	1.6395	43.83	109.899	0.977464	3	0		73921751	Pinin [MASS=82435]	O35691	Q3TUQ5_MOUSE		372133	0.416105	F	43.83	nucleus cytoplasm	regulation of transcription neurotransmitter secretion	protein binding
1959215	Synaptosomal-associated protein	Manual Assigned Name:Synaptosomal-associated protein SwissPROT>B0R030_MOUSE>S110>Synaptosomal-associated protein (Fragment) OS=Mus musculus GN=Snap23 SwissPROT>Q9D3L3_MOUSE>S121>Synaptosomal-associated protein OS=Mus musculus GN=Snap23 SwissPROT>SNP23_MOUSE>S110>Synaptosomal-associated protein 23 OS=Mus musculus GN=Snap23 IPI>Q9D3L3>S121>Synaptosomal-associated protein IPI>O09044>S121>Synaptosoma…	K.ATWGDGGDNS*PSNVVSK.Q	S121	UNI:Q9D3L3	1.80743	0.0246184	2.98903e+06	2.98903e+06	2221534	3876722	3718098	2139753	1.65374e+06	1187671	2823681	1661122	942500	889.876	1.52467	56.87	29.8287	0.763327	2	0		41017844	Synaptosomal-associated protein 23 (SNAP-23) (Vesicle-membrane fusion protein SNAP-23) (Syndet)	Q9D3L3	SNP23_MOUSE		393033	0.563318	F	56.87	membrane nucleus	transport apoptosis	protein binding	SNARE interactions in vesicular transport
1959277	Acetyl-coenzyme A synthetase, cytoplasmic	Manual Assigned Name:Acetyl-coenzyme A synthetase, cytoplasmic SwissPROT>A2AQN4_MOUSE>S263S267>Acyl-CoA synthetase short-chain family member 2 OS=Mus musculus GN=Acss2 SwissPROT>A2AQN5_MOUSE>S263S267>Acyl-CoA synthetase short-chain family member 2 OS=Mus musculus GN=Acss2 SwissPROT>A2AQN6_MOUSE>S124S128>Acyl-CoA synthetase short-chain family member 2 (Fragment) OS=Mus musculus GN=Acss2 SwissPROT>…	R.AELGMNDS*PSQS*PPVK.R	S263S267*	UNI:Q9QXG4	1.80518	0.0264414	5.96504e+06	5.96504e+06	4017483	6786801	5810810	7245062	3.30441e+06	1699363	3284530	2645076	5588672	908.867	1.98599	53.36	24.1724	0.901602	2	0		6691151	acetyl-CoA synthetase [Mus musculus]	Q9QXG4	Q8BK97_MOUSE		385364	0.439252	F	53.36	cytoplasm nucleus	metabolic process	ATP binding catalytic activity	Glycolysis / Gluconeogenesis Pyruvate metabolism Propanoate metabolism Reductive carboxylate cycle (CO2 fixation)
1959005	Pericentriolar material 1 protein	Manual Assigned Name:Pericentriolar material 1 protein SwissPROT>PCM1_MOUSE>S1805S1808>Isoform 2 of Pericentriolar material 1 protein OS=Mus musculus GN=Pcm1 IPI>Q9R0L6>S1766S1769>Pericentriolar material 1 protein IPI>Q9R0L6-2>S1766S1769>Isoform 2 of Pericentriolar material 1 protein IPI>IPI00127764.2>S1766S1769>Pcm1 Isoform 1 of Pericentriolar material 1 protein IPI>IPI00828325.1>S1766S1769>Pcm1…	K.NVRS*DVS*DQEEDEESER.C	S1766S1769*	UNI:Q9R0L6	1.80097	0.0230352	1.36866e+06	1.36866e+06	929718	1502281	1000510	2042127	759958	444738	718978	470635	1405480	734.937	0.268749	38.93	58.7869	0.886871	3	0		341941235	RecName: Full=Pericentriolar material 1 protein; Short=PCM-1; Short=mPCM-1	Q9R0L6	PCM1_MOUSE		378270	0.268749	F	38.93	cytoplasm centriolar satellite	centrosome organization	protein binding
1960225	Ankyrin repeat and IBR domain-containing protein 1	Manual Assigned Name:Ankyrin repeat and IBR domain-containing protein 1 SwissPROT>AKIB1_MOUSE>S740>Ankyrin repeat and IBR domain containing protein 1 (Fragment) SwissPROT>B2RX15_MOUSE>S738>Ankib1 protein OS=Mus musculus GN=Ankib1 IPI>Q6ZPS6>S738>Ankyrin repeat and IBR domain-containing protein 1 IPI>IPI00467355.4>S738>Ankib1 Ankib1 protein NCBI>158518599>S738>Ankyrin repeat and IBR domain-contain…	R.GVAPADS*PDAPR.R	S738*	UNI:Q6ZPS6	1.79339	0.0343397	426843	426843	533306	362273	530265	281526	238009	199659	308018	310285	134074	616.769	0.212571	28.93	100	0.672164	2	0		158518599	Ankyrin repeat and IBR domain-containing protein 1 [MASS=121875]	Q6ZPS6	B2RX15_MOUSE		378581	0.212571	F	28.93	membrane	porphyrin biosynthetic process	protein binding
1958927	La-related protein 1	Manual Assigned Name:La-related protein 1 IPI>Q6ZQ58>S81>La-related protein 1 IPI>IPI00344088.6>S81>Larp1 la related protein IPI>IPI00929786.1>S81>Larp1 Isoform 1 of La-related protein 1 NCBI>147744571>S81>La-related protein 1 (La ribonucleoprotein domain family member 1) NCBI>123223413>S81>La ribonucleoprotein domain family, member 1 [Mus musculus] [MASS=121151] NCBI>226442901>S81>la related pro…	R.ESPRPPAAAEAPAGS*DGEDGGR.R	S81	UNI:Q6ZQ58	1.78703	0.0246184	1.7016e+06	1.7016e+06	1580486	2339295	2626129	260492	952193	937441	1287592	1381880	201858	731.981	0.684616	47.26	50.8484	0.596406	3	0		147744571	La-related protein 1 (La ribonucleoprotein domain family member 1)	Q6ZQ58	LARP1_MOUSE			0.264822	F	47.26
1960063	Vesicle-trafficking protein SEC22b	Manual Assigned Name:Vesicle-trafficking protein SEC22b HPRD>04939_1>S137>SEC22B SwissPROT>SC221_MOUSE>S137>Vesicle trafficking protein SEC22b (SEC22 vesicle trafficking protein-like 1) SwissPROT>SC22B_MOUSE>S137>Vesicle-trafficking protein SEC22b OS=Mus musculus GN=Sec22b IPI>O08547>S137>Vesicle-trafficking protein SEC22b IPI>IPI00114368.3>S137>Sec22b Vesicle-trafficking protein SEC22b IPI>E9Q6R…	R.NLGS*INTELQDVQR.I	S137	UNI:O08547	1.78445	0.0424457	6.72981e+06	6.72981e+06	4520809	13189350	6085467	3123624	3.77138e+06	1047614	8466993	3320191	2250703	556.265	0.323378	21.23	9.40879	0.713171	3	0		48474741	Vesicle trafficking protein SEC22b (SEC22 vesicle trafficking protein-like 1)	O08547	SC22B_MOUSE	04939_1	374938	0.323378	F	21.23	integral to membrane	transport	hydrolase activity protein binding	SNARE interactions in vesicular transport
1958667	Receptor-interacting serine/threonine-protein kinase 3	Manual Assigned Name:Receptor-interacting serine/threonine-protein kinase 3 SwissPROT>Q3U3Z9_MOUSE>S184>Putative uncharacterized protein OS=Mus musculus GN=Ripk3 SwissPROT>RIPK3_MOUSE>S184>Receptor-interacting serine/threonine-protein kinase 3 OS=Mus musculus GN=Ripk3 IPI>Q9QZL0>S184>Receptor-interacting serine/threonine-protein kinase 3 IPI>IPI00137560.1>S184>Ripk3 Receptor-interacting serine/th…	R.DS*GGTLAYLDPELLFK.V	S184	UNI:Q9QZL0	1.7823	0.0285086	2.3753e+06	2.3753e+06	2056180	2988693	2081029		1.33271e+06	1383418	1514297	1100426		909.932	0.548696	64.55	14.0369	0.882234	2	0		20455238	Receptor-interacting serine/threonine protein kinase 3 (RIP-like protein kinase 3) (Receptor-interacting protein 3) (RIP-3) (mRIP3)	Q9QZL0	RIPK3_MOUSE			0.548696	F	64.55	cytoplasm intracellular	protein amino acid phosphorylation	protein binding ATP binding
1959504	E3 ubiquitin-protein ligase NEDD4-like	Manual Assigned Name:E3 ubiquitin-protein ligase NEDD4-like HPRD>05903_1>S428>Ubiquitin protein ligase NEDD4 like SwissPROT>NED4L_MOUSE>S457>Isoform 3 of E3 ubiquitin-protein ligase NEDD4-like OS=Mus musculus GN=Nedd4l IPI>Q8CFI0>S477>E3 ubiquitin-protein ligase NEDD4-like IPI>Q8CFI0-2>S477>Isoform 2 of E3 ubiquitin-protein ligase NEDD4-like IPI>Q8CFI0-3>S477>Isoform 3 of E3 ubiquitin-protein lig…	R.SLS*SPTVTLSAPLEGAK.D	S477*	UNI:Q8CFI0	1.77806	0.0328695	1.11826e+07	1.11826e+07	9637565	15027919	6550526	13514462	6.28923e+06	3636028	6798015	3033314	11689567	869.437	0.136949	75.78	11.9539	0.741538	2	0		73921205	E3 ubiquitin-protein ligase NEDD4-like protein (Nedd4-2) (NEDD4.2) [MASS=115418]	Q8CFI0	NED4L_MOUSE	05903_1		0.136949	F	75.78	cytoplasm intracellular	modification-dependent protein catabolic process	protein binding	Aldosterone-regulated sodium reabsorption Endocytosis Ubiquitin mediated proteolysis
1960300	Drebrin-like protein	Manual Assigned Name:Drebrin-like protein SwissPROT>DBNL_MOUSE>T295>Isoform 3 of Drebrin-like protein OS=Mus musculus GN=Dbnl IPI>Q62418>T299>Drebrin-like protein IPI>Q62418-2>T299>Isoform 2 of Drebrin-like protein IPI>Q62418-3>T299>Isoform 3 of Drebrin-like protein IPI>IPI00308222.3>T299>Dbnl Isoform 2 of Drebrin-like protein IPI>IPI00378015.1>T299>Dbnl Isoform 1 of Drebrin-like protein IPI>IPI0…	K.QLT*QPETSYGR.E	T299*	UNI:Q62418	1.7777	0.0186539	4.43661e+06	4.43661e+06	3909851	4871407	5005545	3959629	2.4957e+06	1815561	2742853	2894663	2529704	680.3	0.611948	38.58	51.5287	0.947216	2	0		51315842	Drebrin-like protein (SH3 domain-containing protein 7) (Actin-binding protein 1) [MASS=48699]	Q62418	DBNL_MOUSE		371900	0.611948	F	38.58	cytoplasm	immune response	protein binding
1959284	Nuclear autoantigen Sp-100	Manual Assigned Name:Nuclear autoantigen Sp-100 SwissPROT>Q3UKD8_MOUSE>T313>Putative uncharacterized protein OS=Mus musculus GN=Sp100 SwissPROT>Q4FK53_MOUSE>T313>Sp100 protein OS=Mus musculus GN=Sp100 SwissPROT>Q8C405_MOUSE>T313>Putative uncharacterized protein OS=Mus musculus GN=Sp100 SwissPROT>SP100_MOUSE>T313>Nuclear autoantigen Sp-100 (Speckled 100 kDa) (Nuclear dot-associated Sp100 protein) …	R.DRGGDT*SDTESSIIIR.R	T313	UNI:O35892	1.76645	0.0344585	8.73029e+06	8.73029e+06	6700150	7535526	6491972	14193515	4.94229e+06	2914333	2185479	3672779	10996582	601.271	0.331336	30.87	5.21325	0.391769	3	0		341942058	RecName: Full=Nuclear autoantigen Sp-100; AltName: Full=Nuclear dot-associated Sp100 protein; AltName: Full=Speckled 100 kDa	O35892	SP100_MOUSE		384814	0.278056	F	30.87	nucleus	oxidation reduction regulation of apoptosis positive regulation of transcription from RNA polymerase II promoter	metal ion binding DNA binding
1960097	60S acidic ribosomal protein P1	Manual Assigned Name:60S acidic ribosomal protein P1 SwissPROT>RLA1_MOUSE>S101S104>60S acidic ribosomal protein P1 OS=Mus musculus GN=Rplp1 IPI>P47955>S101S104>60S acidic ribosomal protein P1 IPI>IPI00113377.1>S101S104>Rplp1 60S acidic ribosomal protein P1 IPI>E9Q3T0>S101S104>Uncharacterized protein IPI>IPI00753932.1>S101S104>- similar to acidic ribosomal phosphoprotein P1 isoform 1 IPI>IPI008488…	K.KEES*EES*EDDMGFGLFD.-	S101S104	UNI:P47955	1.74876	0.0323339	2.14487e+06	2.14487e+06	921157	2705128	2808337		1.22651e+06	417094	1385010	1877433		1062.36	0.241088	26.36	100	0.446048	2	0		1350781	60S acidic ribosomal protein P1	P47955	RLA1_MOUSE		387885	0.0103592	F	26.36	intracellular cytoplasm	translational elongation	structural constituent of ribosome protein binding	Ribosome
1959210	Microtubule-associated protein	Manual Assigned Name:Microtubule-associated protein IPI>E9QPW8>S517>Microtubule-associated protein IPI>P27546>S517>Microtubule-associated protein 4 IPI>P27546-2>S517>Isoform 2 of Microtubule-associated protein 4 IPI>P27546-3>S517>Isoform 3 of Microtubule-associated protein 4 IPI>IPI00848818.1>S517>Mtap4 microtubule-associated protein 4 IPI>IPI00408119.6>S517>Mtap4 Isoform 1 of Microtubule-associa…	K.DMS*PSAETEAPLAK.N	S517	UNI:E9QPW8	1.74609	0.0105956	9.67417e+06	9.67417e+06	9070041	11491417	12885242	5249968	5.54047e+06	5049704	6597389	7929471	2585314	763.826	0.778177	74.68	35.3857	0.90773	2	0		148887397	Microtubule-associated protein 4 (MAP 4)	E9QPW8	E9QPW8_MOUSE		377095	0.778177	F	74.68	microtubule	negative regulation of microtubule depolymerization	protein binding
1958632	E3 ubiquitin-protein ligase Mdm2	Manual Assigned Name:E3 ubiquitin-protein ligase Mdm2 SwissPROT>MDM2_MOUSE>S134>Isoform Mdm2-p76 of E3 ubiquitin-protein ligase Mdm2 OS=Mus musculus GN=Mdm2 SwissPROT>Q3TVL4_MOUSE>S183>Putative uncharacterized protein OS=Mus musculus GN=Mdm2 IPI>P23804>S183>E3 ubiquitin-protein ligase Mdm2 IPI>P23804-2>S183>Isoform Mdm2-p76 of E3 ubiquitin-protein ligase Mdm2 IPI>IPI00323397.1>S183>Mdm2 Isoform M…	R.S*LSFDPSLGLCELR.E	S183*	UNI:P23804	1.73958	0.022068	6.28233e+06	6.28233e+06	7190867	11259875	6670046	8520	3.61141e+06	4258001	5940378	4243456	3801	842.387	1.28997	91.04	19.397	0.956257	2	0		341940995	RecName: Full=E3 ubiquitin-protein ligase Mdm2; AltName: Full=Double minute 2 protein; AltName: Full=Oncoprotein Mdm2; AltName: Full=p53-binding protein Mdm2	P23804	Q3TVL4_MOUSE		371763	0.45018	F	91.04	nucleus	modification-dependent protein catabolic process negative regulation of transcription from RNA polymerase II promoter	protein binding	Pathways in cancer Bladder cancer Endocytosis Glioma Prostate cancer Melanoma Chronic myeloid leukemia p53 signaling pathway Cell cycle Ubiquitin mediated proteolysis
1958668	Receptor-interacting serine/threonine-protein kinase 3	Manual Assigned Name:Receptor-interacting serine/threonine-protein kinase 3 SwissPROT>Q3U3Z9_MOUSE>T187>Putative uncharacterized protein OS=Mus musculus GN=Ripk3 SwissPROT>RIPK3_MOUSE>T187>Receptor-interacting serine/threonine-protein kinase 3 OS=Mus musculus GN=Ripk3 IPI>Q9QZL0>T187>Receptor-interacting serine/threonine-protein kinase 3 IPI>IPI00137560.1>T187>Ripk3 Receptor-interacting serine/th…	R.DSGGT*LAYLDPELLFK.V	T187	UNI:Q9QZL0	1.73809	0.0221739	2.13639e+06	2.13639e+06	2056180	2988693	2081029	1419657	1.22916e+06	1383418	1514297	1100426	918486	913.94	0.923984	57.47		0.876495	2	0		20455238	Receptor-interacting serine/threonine protein kinase 3 (RIP-like protein kinase 3) (Receptor-interacting protein 3) (RIP-3) (mRIP3)	Q9QZL0	RIPK3_MOUSE			0.923984	F	57.47	cytoplasm intracellular	protein amino acid phosphorylation	protein binding ATP binding
1959009	MCG126099, isoform CRA_b	Manual Assigned Name:MCG126099, isoform CRA_b SwissPROT>D3Z3A0_MOUSE>S122S123>"MCG126099, isoform CRA_b OS=Mus musculus GN=Ppp1r2" SwissPROT>IPP2_MOUSE>S121S122>Protein phosphatase inhibitor 2 (IPP-2) IPI>D3Z3A0>S122S123>MCG126099, isoform CRA_b IPI>Q9DCL8>S122S123>Protein phosphatase inhibitor 2 IPI>IPI00605686.2>S122S123>EG546723 Predicted IPI>IPI00856140.1>S122S123>Ppp1r2 Uncharacterized prote…	R.EQES*S*GEEDNDLSPEER.E	S122S123*	UNI:D3Z3A0	1.73236	0.0333459	2.81565e+06	2.81565e+06	1191904	3989853	4747449	1333401	1.62533e+06	582423	2174776	2529765	1214361	707.247	0.0665181	26.11	67.8021	0.913588	3	0		51316524	Protein phosphatase inhibitor 2 (IPP-2)	D3Z3A0	IPP2_MOUSE		383332	0.0665181	F	26.11	nucleus	carbohydrate metabolic process	protein binding
1958971	E3 ubiquitin-protein ligase NEDD4	Manual Assigned Name:E3 ubiquitin-protein ligase NEDD4 SwissPROT>NEDD4_MOUSE>S309>E3 ubiquitin-protein ligase NEDD4 OS=Mus musculus GN=Nedd4 IPI>P46935>S309>E3 ubiquitin-protein ligase NEDD4 IPI>IPI00462445.2>S309>Nedd4 E3 ubiquitin-protein ligase NEDD4 NCBI>32172436>S309>E3 ubiquitin-protein ligase Nedd-4 NCBI>187951209>S309>Neural precursor cell expressed, developmentally down-regulated gene 4 …	R.QIS*EDVDGPDNR.E	S309	UNI:P46935	1.72133	0.0311819	1.5421e+06	1.5421e+06	959226	1816467	2884434	508293	895878	617322	991574	1529625	444989	717.791	1.53495	39.2	100	0.943106	2	0		32172436	E3 ubiquitin-protein ligase Nedd-4	P46935	NEDD4_MOUSE		376955	1.53495	F	39.2	cytoplasm	modification-dependent protein catabolic process	protein binding	Endocytosis Ubiquitin mediated proteolysis
1959133	Myeloid leukemia factor 2	Manual Assigned Name:Myeloid leukemia factor 2 HPRD>03238_1>S238>MLF2 SwissPROT>MLF2_MOUSE>S237>Myeloid leukemia factor 2 OS=Mus musculus GN=Mlf2 IPI>Q99KX1>S237>Myeloid leukemia factor 2 IPI>IPI00116372.1>S237>Mlf2 Myeloid leukemia factor 2 IPI>IPI00750944.1>S237>LOC100048413 similar to Myeloid leukemia factor 2 NCBI>17368615>S237>Myeloid leukemia factor 2 (Myelodysplasia-myeloid leukemia factor…	R.LAIQGPEDS*PSR.Q	S237*	UNI:Q99KX1	1.70351	0.0230352	3.72231e+07	3.72231e+07	39352720	48984105	45632327	14923252	2.18508e+07	26592361	27646897	22925084	10239047	680.313	0.0603111	41.2	16.118	0.901792	2	0		17368615	Myeloid leukemia factor 2 (Myelodysplasia-myeloid leukemia factor 2)	Q99KX1	MLF2_MOUSE	03238_1	376003	0.0603111	F	41.2	nucleus	defense response	protein binding
1959730	Myeloid leukemia factor 2	Manual Assigned Name:Myeloid leukemia factor 2 HPRD>03238_1>S240>MLF2 SwissPROT>MLF2_MOUSE>S239>Myeloid leukemia factor 2 OS=Mus musculus GN=Mlf2 IPI>Q99KX1>S239>Myeloid leukemia factor 2 IPI>IPI00116372.1>S239>Mlf2 Myeloid leukemia factor 2 IPI>IPI00750944.1>S239>LOC100048413 similar to Myeloid leukemia factor 2 NCBI>17368615>S239>Myeloid leukemia factor 2 (Myelodysplasia-myeloid leukemia factor…	R.LAIQGPEDSPS*R.Q	S239*	UNI:Q99KX1	1.70351	0.0230352	3.72231e+07	3.72231e+07	39352720	48984105	45632327	14923252	2.18508e+07	26592361	27646897	22925084	10239047	675.308	0.994363	33.14	19.8227	0.613917	2	0		17368615	Myeloid leukemia factor 2 (Myelodysplasia-myeloid leukemia factor 2)	Q99KX1	MLF2_MOUSE	03238_1	376003	0.994363	F	33.14	nucleus	defense response	protein binding
1960123	Vimentin	Manual Assigned Name:Vimentin SwissPROT>VIME_MOUSE>Vimentin OS=Mus musculus GN=Vim IPI>P20152>Vimentin IPI>IPI00227299.6>Vim Vimentin IPI>E9PZV5>Uncharacterized protein NCBI>138536>Vimentin NCBI>148676107>vimentin, isoform CRA_b [Mus musculus] [MASS=53687] NCBI>123858292>vimentin [Mus musculus] NCBI>58476928>Vimentin [Mus musculus] NCBI>2078001>vimentin [Mus musculus] NCBI>202370>vimentin NCBI>55…	R.ISLPLPTFSS*LNLR.E	S420*	UNI:P20152	1.69543	0.0339773	6.48191e+06	6.48191e+06	7650739	7946712	3848271		3.82317e+06	4964808	4801001	1703704		549.964	1.66699	37.39	13.9358	0.917285	3	0		138536	Vimentin	P20152	VIME_MOUSE		374414	1.66699	F	37.39	cytoplasm	intermediate filament-based process	protein binding
1960345	Ahnak AHNAK nucleoprotein isoform 1	Manual Assigned Name:Ahnak AHNAK nucleoprotein isoform 1 SwissPROT>Q8BRB8_MOUSE>Putative uncharacterized protein (Fragment) OS=Mus musculus GN=Ahnak IPI>IPI00553798.2>Ahnak AHNAK nucleoprotein isoform 1 IPI>E9Q616>Uncharacterized protein NCBI>61743961>AHNAK nucleoprotein isoform 1 [Mus musculus] [MASS=604249] NCBI>26337133>unnamed protein product [Mus musculus]	R.LRS*EDGVEGDLGETQSR.T	S136	UNI:IPI00553798.2	1.69451	0.018138	1.76408e+06	1.76408e+06	2478145	2215531	1858533	504122	1.04106e+06	1512023	1249853	1162548	239812	964.423	0.514566	49.83	124.595	0.909427	2	0		61743961	AHNAK nucleoprotein isoform 1 [Mus musculus] [MASS=604249]	IPI00553798.2	Q8BRB8_MOUSE			0.514566	F	49.83	mitochondrion	protein amino acid phosphorylation	protein binding
1959716	Nucleoporin 98	Manual Assigned Name:Nucleoporin 98 SwissPROT>Q68G59_MOUSE>S281>Nup98 protein (Fragment) OS=Mus musculus GN=Nup98 SwissPROT>Q6PFD9_MOUSE>S888>Nucleoporin 98 OS=Mus musculus GN=Nup98 IPI>Q6PFD9>S888>Nucleoporin 98 IPI>IPI00474558.7>S888>Nup98 Nup98 protein IPI>IPI00464141.2>S888>Nup98 Nucleoporin 98 IPI>E9PYP6>S888>Uncharacterized protein IPI>E9PZU1>S888>Uncharacterized protein IPI>E9Q4S2>S888>Unc…	K.YGLQDS*DEEEEEHPPK.T	S888*	UNI:Q6PFD9	1.69418	0.0314417	4.85111e+06	4.85111e+06	3251211	7336641	7139319	1677281	2.8634e+06	1349170	4425265	4328385	1350765	661.261	0.0817451	27.32	30.4824	0.933895	3	0		51258091	AI849286 protein [Mus musculus] [MASS=136359]	Q6PFD9	Q6PFD9_MOUSE		385648	0.0817451	F	27.32	nucleus	transport	peptide binding protein binding microtubule binding
1959387	Tyrosine-protein kinase JAK2	Manual Assigned Name:Tyrosine-protein kinase JAK2 SwissPROT>JAK2_MOUSE>S523>Tyrosine-protein kinase JAK2 OS=Mus musculus GN=Jak2 IPI>Q62120>S523>Tyrosine-protein kinase JAK2 IPI>IPI00122143.3>S523>Jak2 tyrosine-protein kinase JAK2 NCBI>189047109>S523>Tyrosine-protein kinase JAK2 (Janus kinase 2) (JAK-2) [MASS=130234] NCBI>37590526>S523>Jak2 protein [Mus musculus] NCBI>32451722>S523>Jak2 protein […	R.TNGISDVQIS*PTLQR.H	S523	UNI:Q62120	1.67315	0.0435299	3.04076e+06	3.04076e+06	1674751	4486076	4047870	1954351	1.81738e+06	681399	2720699	1885072	1982366	854.916	0.697555	55.57	32.1312	0.950232	2	0		189047109	Tyrosine-protein kinase JAK2 (Janus kinase 2) (JAK-2) [MASS=130234]	Q62120	JAK2_MOUSE		384319	0.697555	F	55.57	nucleus	protein amino acid phosphorylation	protein binding	Jak-STAT signaling pathway Chemokine signaling pathway Adipocytokine signaling pathway Leishmania infection
1958831	PHD and RING finger domain-containing protein 1	Manual Assigned Name:PHD and RING finger domain-containing protein 1 SwissPROT>PHRF1_MOUSE>S884S886>Isoform 2 of PHD and RING finger domain-containing protein 1 OS=Mus musculus GN=Phrf1 SwissPROT>Q3TPE7_MOUSE>S42S44>Putative uncharacterized protein (Fragment) OS=Mus musculus GN=Phrf1 IPI>A6H619>S1043S1045>PHD and RING finger domain-containing protein 1 IPI>A6H619-2>S1043S1045>Isoform 2 of PHD and…	R.S*VS*PVAEEHTR.R	S1043S1045	UNI:A6H619	1.67223	0.0285086	378910	378910	256410	436645	661126	161458	226589	185950	282554	316394	121459	686.27	0.730569	23.23	68.9275	0.924008	2	0		215275613	RecName: Full=PHD and RING finger domain-containing protein 1 [MASS=184079]	A6H619	Q3TPE7_MOUSE		389655	0.730569	F	23.23	nucleus	intracellular signaling cascade mRNA processing	protein binding protein domain specific binding
1959069	Polymerase I and transcript release factor	Manual Assigned Name:Polymerase I and transcript release factor SwissPROT>PTRF_MOUSE>S171>Polymerase I and transcript release factor OS=Mus musculus GN=Ptrf IPI>O54724>S171>Polymerase I and transcript release factor IPI>IPI00117689.1>S171>Ptrf Polymerase I and transcript release factor NCBI>56749456>S171>Polymerase I and transcript release factor [MASS=43953] NCBI>18140061>S171>polymerase I and t…	K.LPAKLSVS*K.S	S171*	UNI:O54724	1.66528	0.0246184	2.10387e+07	2.10387e+07	33677907	22448040	13735306	14293673	1.26338e+07	21220757	12513679	6595284	10205361	519.8	0.229156	39.79	32.1312	0.354367	2	0		56749456	Polymerase I and transcript release factor [MASS=43953]	O54724	PTRF_MOUSE		382871	0.229156	F	39.79	nucleus	regulation of transcription	protein binding
1959079	Polymerase I and transcript release factor	Manual Assigned Name:Polymerase I and transcript release factor SwissPROT>PTRF_MOUSE>S169>Polymerase I and transcript release factor OS=Mus musculus GN=Ptrf IPI>O54724>S169>Polymerase I and transcript release factor IPI>IPI00117689.1>S169>Ptrf Polymerase I and transcript release factor NCBI>56749456>S169>Polymerase I and transcript release factor [MASS=43953] NCBI>18140061>S169>polymerase I and t…	K.LPAKLS*VSK.S	S169*	UNI:O54724	1.66528	0.0246184	2.10387e+07	2.10387e+07	33677907	22448040	13735306	14293673	1.26338e+07	21220757	12513679	6595284	10205361	511.787	1.74854	29.9	19.8227	0.459172	2	0		56749456	Polymerase I and transcript release factor [MASS=43953]	O54724	PTRF_MOUSE		382871	1.74854	F	29.9	nucleus	regulation of transcription	protein binding
1959032	Tripartite motif-containing protein 47	Manual Assigned Name:Tripartite motif-containing protein 47 SwissPROT>Q7TMQ8_MOUSE>S164>Trim47 protein (Fragment) OS=Mus musculus GN=Trim47 SwissPROT>TRI47_MOUSE>S393>Isoform 2 of Tripartite motif-containing protein 47 OS=Mus musculus GN=Trim47 IPI>Q8C0E3>S393>Tripartite motif-containing protein 47 IPI>Q8C0E3-2>S393>Isoform 2 of Tripartite motif-containing protein 47 IPI>IPI00480235.1>S393>Trim47…	R.GLGS*NEDGLQK.L	S393	UNI:Q8C0E3	1.66219	0.0246184	7.9248e+06	7.9248e+06	5368462	9188268	9004644	8137824	4.76769e+06	2710788	4967357	4958974	6433638	603.268	0.255489	42.09	100	0.859054	2	0		55976729	Tripartite motif protein 47 [MASS=69912]	Q8C0E3	TRI47_MOUSE		372038	0.0564068	F	42.09	nucleus	acrosome reaction	protein binding
1958852	Serine/arginine repetitive matrix 1	Manual Assigned Name:Serine/arginine repetitive matrix 1 HPRD>10441_1>S389S391S393>Serine arginine repetitive matrix protein 1 SwissPROT>A2A8V8_MOUSE>S387S389S391>Serine/arginine repetitive matrix 1 OS=Mus musculus GN=Srrm1 SwissPROT>A2A8V9_MOUSE>S382S384S386>Serine/arginine repetitive matrix 1 OS=Mus musculus GN=Srrm1 SwissPROT>SRRM1_MOUSE>S387S389S391>Isoform 2 of Serine/arginine repetitive mat…	R.RLS*PS*AS*PPR.R	S387S389S391*	UNI:A2A8V8	1.66119	0.0252585	7.17536e+06	7.17536e+06	2996023	7859804	10467577	7378017	4.31942e+06	1801265	3725415	6052486	5698505	654.251	0.0902489	22.59	100	0.76582	2	0		347595715	RecName: Full=Serine/arginine repetitive matrix protein 1; AltName: Full=Plenty-of-prolines 101	A2A8V8	SRRM1_MOUSE	10441_1	375402	0.0902489	F	22.59	nucleus spliceosomal complex	mRNA processing	DNA binding protein binding lysophospholipase activity zinc ion binding
1960059	6-phosphofructokinase, liver type	Manual Assigned Name:6-phosphofructokinase, liver type SwissPROT>K6PL_MOUSE>S775>"6-phosphofructokinase, liver type OS=Mus musculus GN=Pfkl" SwissPROT>Q8VDX7_MOUSE>S775>"Phosphofructokinase, liver, B-type OS=Mus musculus GN=Pfkl" IPI>P12382>S775>6-phosphofructokinase, liver type IPI>IPI00554862.2>S775>Pfkl 6-phosphofructokinase, liver type IPI>IPI00387312.2>S775>Pfkl 6-phosphofructokinase, liver …	R.TLS*IDKGF.-	S775	UNI:P12382	1.66109	0.0246184	1.25363e+07	1.25363e+07	10419981	15728719	12061741	11934898	7.54706e+06	4854473	9019873	8146504	8167399	484.733	0.249882	41.98	45.1572	0.949306	2	0		341941131	RecName: Full=6-phosphofructokinase, liver type; AltName: Full=Phosphofructo-1-kinase isozyme B; Short=PFK-B; AltName: Full=Phosphofructokinase 1; AltName: Full=Phosphohexokinase	P12382	Q8VDX7_MOUSE		371806	0.0640193	F	41.98	cytoplasm	carbohydrate metabolic process	ATP binding	Glycolysis / Gluconeogenesis Fructose and mannose metabolism Galactose metabolism Pentose phosphate pathway
1958966	Isoform 3 of Peripheral plasma membrane protein CASK	Manual Assigned Name:Isoform 3 of Peripheral plasma membrane protein CASK IPI>O70589-3>S571>Isoform 3 of Peripheral plasma membrane protein CASK IPI>IPI00776341.2>S571>Cask Isoform 3 of Peripheral plasma membrane protein CASK NCBI>123213541>S545>calcium/calmodulin-dependent serine protein kinase (MAGUK family) [Mus musculus] NCBI>123292791>S545>calcium/calmodulin-dependent serine protein kinase (…	R.TQSSS*CEDLPSTTQPK.G	S571	UNI:O70589-3	1.65873	0.0366099	1.86422e+06	1.86422e+06	787363	2414234	2708171	1547097	1.12388e+06	481599	1382168	1205242	1426515	923.382	0.10944	63.86	27.6042	0.892506	2	0		123213541	calcium/calmodulin-dependent serine protein kinase (MAGUK family) [Mus musculus]	O70589-3	CSKP_MOUSE			0.10944	F	63.86	integral to membrane	protein amino acid phosphorylation	protein binding	Tight junction
1959670	Isoform 3 of Peripheral plasma membrane protein CASK	Manual Assigned Name:Isoform 3 of Peripheral plasma membrane protein CASK IPI>O70589-3>S570>Isoform 3 of Peripheral plasma membrane protein CASK IPI>IPI00776341.2>S570>Cask Isoform 3 of Peripheral plasma membrane protein CASK NCBI>123213541>S544>calcium/calmodulin-dependent serine protein kinase (MAGUK family) [Mus musculus] NCBI>123292791>S544>calcium/calmodulin-dependent serine protein kinase (…	R.TQSS*SCEDLPSTTQPK.G	S570	UNI:O70589-3	1.65873	0.0366099	1.86422e+06	1.86422e+06	787363	2414234	2708171	1547097	1.12388e+06	481599	1382168	1205242	1426515	923.382	0.10944	44.32	27.6042	0.948961	2	0		123213541	calcium/calmodulin-dependent serine protein kinase (MAGUK family) [Mus musculus]	O70589-3	CSKP_MOUSE			0.10944	F	44.32	integral to membrane	protein amino acid phosphorylation	protein binding	Tight junction
1960098	Cyclin-dependent kinase 11	Manual Assigned Name:Cyclin-dependent kinase 11 HPRD>00308_1>S271>Cell division cycle 2 like 2 HPRD>00308_2>S268>Cell division cycle 2 like 2 HPRD>00308_4>S267>Cell division cycle 2 like 2 HPRD>00308_5>S258>Cell division cycle 2 like 2 HPRD>00308_7>S266>Cell division cycle 2 like 2 HPRD>00308_8>S268>Cell division cycle 2 like 2 HPRD>08909_1>S283>Cell division cycle 2 like 1 HPRD>08909_2>S270>Cell…	R.DLLSDLQDIS*DSER.K	S270*	UNI:P24788	1.65848	0.0312601	6.482e+06	6.482e+06	5193032	7046173	7206806		3.90841e+06	3759420	4031821	3933986		562.581	1.33355	24.9	1.01709	0.855753	3	0		57015295	PITSLRE serine/threonine-protein kinase CDC2L1 (Galactosyltransferase associated protein kinase p58/GTA) (Cell division cycle 2-like protein kinase 1)	P24788	CD2L1_MOUSE	08909_8	389776	1.33355	F	24.9	nucleus intracellular mitochondrion	protein amino acid phosphorylation cell division	protein binding ATP binding structural constituent of ribosome
1959464	Glycogen [starch] synthase, muscle	Manual Assigned Name:Glycogen [starch] synthase, muscle SwissPROT>D3Z0Q6_MOUSE>S645>Uncharacterized protein OS=Mus musculus GN=Gys1 SwissPROT>GYS1_MOUSE>S709>"Glycogen [starch] synthase, muscle OS=Mus musculus GN=Gys1" SwissPROT>GYS3_MOUSE>S708>Glycogen [starch] synthase, brain (EC 2.4.1.11) IPI>Q9Z1E4>S709>Glycogen [starch] synthase, muscle IPI>IPI00652098.2>S709>Gys1 glycogen synthase 1, muscle…	R.S*NSVDTGPSSSLSTPTEPLSPTSSLGEER.N	S709*	UNI:Q9Z1E4	1.65217	0.0359496	1.74206e+07	1.74206e+07	12441062	23264154	26127681	7849423	1.05441e+07	4294682	13971237	18191344	5718957	1000.45	1.0639	27.63	12.2185	0.448308	3	0		218512063	RecName: Full=Glycogen [starch] synthase, muscle	Q9Z1E4	GYS3_MOUSE		370159	1.0639	F	27.63	cytoplasm	heart development	protein binding	Starch and sucrose metabolism Insulin signaling pathway
1960446	Glycogen [starch] synthase, muscle	Manual Assigned Name:Glycogen [starch] synthase, muscle SwissPROT>D3Z0Q6_MOUSE>S647>Uncharacterized protein OS=Mus musculus GN=Gys1 SwissPROT>GYS1_MOUSE>S711>"Glycogen [starch] synthase, muscle OS=Mus musculus GN=Gys1" SwissPROT>GYS3_MOUSE>S710>Glycogen [starch] synthase, brain (EC 2.4.1.11) IPI>Q9Z1E4>S711>Glycogen [starch] synthase, muscle IPI>IPI00652098.2>S711>Gys1 glycogen synthase 1, muscle…	R.SNS*VDTGPSSSLSTPTEPLSPTSSLGEER.N	S711*	UNI:Q9Z1E4	1.65217	0.0359496	1.74206e+07	1.74206e+07	12441062	23264154	26127681	7849423	1.05441e+07	4294682	13971237	18191344	5718957	1000.45	0.0276728	32.32	4.55932	0.571235	3	0		218512063	RecName: Full=Glycogen [starch] synthase, muscle	Q9Z1E4	GYS3_MOUSE		370159	0.0276728	F	32.32	cytoplasm	heart development	protein binding	Starch and sucrose metabolism Insulin signaling pathway
1959769	Zinc finger Ran-binding domain-containing protein 2	Manual Assigned Name:Zinc finger Ran-binding domain-containing protein 2 HPRD>09185_1>Zinc finger protein 265 HPRD>09185_2>Zinc finger protein 265 SwissPROT>D3Z4T7_MOUSE>Uncharacterized protein OS=Mus musculus GN=Zranb2 SwissPROT>D3Z4T9_MOUSE>Uncharacterized protein OS=Mus musculus GN=Zranb2 SwissPROT>D3Z4U0_MOUSE>Uncharacterized protein OS=Mus musculus GN=Zranb2 SwissPROT>ZN265_MOUSE>Zinc finger…	R.EES*DGEYDEFGR.K	S120*	UNI:Q9R020	1.64887	0.0460015	2.66588e+06	2.66588e+06	1498724	3275266	5514588	374931	1.61679e+06	577274	2295658	3238641	355592	756.761	1.00627	47.2	33.224	0.890002	2	0		146291107	Zinc finger Ran-binding domain-containing protein 2 (Zinc finger protein 265) (Zinc finger, splicing)	Q9R020	ZRAB2_MOUSE	9185	392976	1.00627	F	47.2	nucleus	mRNA processing	zinc ion binding protein binding
1959999	Paralemmin-1	Manual Assigned Name:Paralemmin-1 SwissPROT>PALM_MOUSE>T141T145>Isoform 2 of Paralemmin OS=Mus musculus GN=Palm IPI>Q9Z0P4>T141T145>Paralemmin-1 IPI>Q9Z0P4-2>T141T145>Isoform 2 of Paralemmin-1 IPI>IPI00129298.1>T141T145>Palm Isoform 1 of Paralemmin IPI>IPI00323809.3>T141T145>Palm Isoform 2 of Paralemmin IPI>IPI00972903.1>T141T145>Palm Putative uncharacterized protein NCBI>22653923>T141T145>Parale…	K.SETLVNAQQT*PLGT*PK.E	T141T145	UNI:Q9Z0P4	1.64817	0.0246184	6.5468e+06	6.5468e+06	4593214	6378393	6749281	8466319	3.97216e+06	2731428	3612114	3206379	6338720	926.423	0.0550804	49.42	130.382	0.949692	2	0		22653923	Paralemmin	Q9Z0P4	PALM_MOUSE		378507	0.0550804	F	49.42	membrane	cytoskeleton organization	D3 dopamine receptor binding
1958603	Ahnak AHNAK nucleoprotein isoform 1	Manual Assigned Name:Ahnak AHNAK nucleoprotein isoform 1 IPI>IPI00553798.2>Ahnak AHNAK nucleoprotein isoform 1 IPI>E9Q1H8>Uncharacterized protein IPI>E9Q616>Uncharacterized protein NCBI>34766351>AHNAK [Mus musculus] [MASS=68761] NCBI>18204820>AA589382 protein [Mus musculus] NCBI>61743961>AHNAK nucleoprotein isoform 1 [Mus musculus] [MASS=604249]	K.ASLGS*LEGEVEAEASSPK.G	S5525	UNI:IPI00553798.2	1.6473	0.0230352	5.25749e+06	5.25749e+06	5869313	7888772	7158119	113763	3.19158e+06	3605515	4586001	4526013	48796	920.915	0.563878	80.49	15.5751	0.844599	2	0		34766351	AHNAK [Mus musculus] [MASS=68761]	IPI00553798.2				0.563878	F	80.49
1960147	Dual specificity protein phosphatase	Manual Assigned Name:Dual specificity protein phosphatase HPRD>02136_1>S325>Dual specificity phosphatase 9 HPRD>04124_1>S328>Dual specificity phosphatase 6 HPRD>04124_2>S182>Dual specificity phosphatase 6 HPRD>04125_1>S315>Dual specificity phosphatase 7 SwissPROT>DUS6_MOUSE>S328>Dual specificity protein phosphatase 6 (EC 3.1.3.48) (EC 3.1.3.16) (Mitogen-activated protein kinase phosphatase 3) (MA…	K.S*NISPNFNFMGQLLDFER.T	S328	UNI:E9Q3P6	1.64474	0.0435864	2.1086e+06	2.1086e+06	1154081	3042151	2129557		1.28202e+06	872504	1985267	988297		736.999	1.30241	26.59	14.5593	0.9762	3	0		338817907	RecName: Full=Dual specificity protein phosphatase 7	E9Q3P6	Q7TNL7_MOUSE	04125_1	371649	1.30241	F	26.59	cytoplasm nucleus endoplasmic reticulum	cell differentiation protein amino acid dephosphorylation	protein binding hydrolase activity protein tyrosine phosphatase activity kinase activity	MAPK signaling pathway
1959472	SH2B adapter protein 2	Manual Assigned Name:SH2B adapter protein 2 SwissPROT>APS_MOUSE>S588>SH2 and PH domain-containing adapter protein APS (Adapter protein with pleckstrin homology and Src homology 2 domains) SwissPROT>Q6PG00_MOUSE>S588>Putative uncharacterized protein OS=Mus musculus GN=Sh2b2 SwissPROT>SH2B2_MOUSE>S588>SH2B adapter protein 2 OS=Mus musculus GN=Sh2b2 IPI>Q9JID9>S588>SH2B adapter protein 2 IPI>IPI0012…	R.SNS*TEHLLDAASGATEEPTEATLGR.A	S588	UNI:Q9JID9	1.64252	0.0285086	9.41432e+06	9.41432e+06	5638307	11564559	9739488	10714939	5.73164e+06	3798432	7653976	6859574	4614595	883.062	1.77208	47.67		0.911613	3	0		341942026	RecName: Full=SH2B adapter protein 2; AltName: Full=Adapter protein with pleckstrin homology and Src homology 2 domains; AltName: Full=SH2 and PH domain-containing adapter protein APS	Q9JID9	SH2B2_MOUSE		370295	0.114084	F	47.67	membrane cytoplasm	intracellular signaling cascade	protein binding	Insulin signaling pathway Neurotrophin signaling pathway
1960122	Vimentin	Manual Assigned Name:Vimentin SwissPROT>VIME_MOUSE>Vimentin OS=Mus musculus GN=Vim IPI>P20152>Vimentin IPI>IPI00227299.6>Vim Vimentin IPI>E9PZV5>Uncharacterized protein NCBI>138536>Vimentin NCBI>148676107>vimentin, isoform CRA_b [Mus musculus] [MASS=53687] NCBI>123858292>vimentin [Mus musculus] NCBI>58476928>Vimentin [Mus musculus] NCBI>2078001>vimentin [Mus musculus] NCBI>202370>vimentin NCBI>55…	R.ISLPLPTFSS*LNLR.E	S420*	UNI:P20152	1.64026	0.0201463	9.44876e+06	9.44876e+06	10504438	12032705	5809149		5.76053e+06	6417623	7082566	3781391		819.437	0.123331	41.83	8.22355	0.860565	2	0		138536	Vimentin	P20152	VIME_MOUSE		374414	0.123331	F	41.83	cytoplasm	intermediate filament-based process	protein binding
1958748	Protein DEK	Manual Assigned Name:Protein DEK SwissPROT>DEK_MOUSE>S247S248S255>Protein DEK OS=Mus musculus GN=Dek SwissPROT>Q3UR53_MOUSE>S63S64S71>Putative uncharacterized protein OS=Mus musculus GN=Dek IPI>Q7TNV0>S247S248S255>Protein DEK IPI>IPI00227720.3>S247S248S255>Dek Protein DEK IPI>IPI00652367.1>S247S248S255>Dek Putative uncharacterized protein NCBI>73620776>S247S248S255>Protein DEK NCBI>33416321>S247S…	K.NKEES*S*EDEEKES*EEEQPPK.K	S247S248S255*	UNI:Q7TNV0	1.63914	0.0230352	311748	311748	81616	444405	505390	215581	190189	58849	258495	328989	114425	872.976	0.447856	25.03	100	0.302989	3	0		73620776	Protein DEK	Q7TNV0	Q3UR53_MOUSE		372292	0.447856	F	25.03	nucleus intracellular	response to protein stimulus	DNA binding histone binding
1959077	Thyroid hormone receptor-associated protein 3	Manual Assigned Name:Thyroid hormone receptor-associated protein 3 SwissPROT>Q8BZN7_MOUSE>S379>Putative uncharacterized protein OS=Mus musculus GN=Thrap3 SwissPROT>TR150_MOUSE>S379>Thyroid hormone receptor-associated protein 3 OS=Mus musculus GN=Thrap3 IPI>Q569Z6>S379>Thyroid hormone receptor-associated protein 3 IPI>Q8BZN7>S379>Thyroid hormone receptor associated protein 3 IPI>IPI00556768.1>S379…	K.GGFS*DADVK.M	S379	UNI:Q569Z6	1.63893	0.0246184	1.46785e+06	1.46785e+06	1348946	1907064	1526184	1089206	895615	1054237	1030277	806166	691778	488.194	0.473661	52.27	100	0.942819	2	0		81882407	Thyroid hormone receptor-associated protein 3 (Thyroid hormone receptor-associated protein complex 150 kDa component) (Trap150)	Q569Z6	TR150_MOUSE		388931	0.459307	F	52.27	nucleus mediator complex	regulation of transcription transcription from RNA polymerase II promoter	protein binding ATP binding receptor activity
1960148	Dual specificity protein phosphatase	Manual Assigned Name:Dual specificity protein phosphatase HPRD>02136_1>S328>Dual specificity phosphatase 9 HPRD>04124_1>S331>Dual specificity phosphatase 6 HPRD>04124_2>S185>Dual specificity phosphatase 6 HPRD>04125_1>S318>Dual specificity phosphatase 7 SwissPROT>DUS6_MOUSE>S331>Dual specificity protein phosphatase 6 (EC 3.1.3.48) (EC 3.1.3.16) (Mitogen-activated protein kinase phosphatase 3) (MA…	K.SNIS*PNFNFMGQLLDFER.T	S331	UNI:E9Q3P6	1.62505	0.0435299	511084	511084	216097	746351	570803		314504	83271	488770	371470		1110	0.544392	80.47	11.9539	0.975968	2	0		338817907	RecName: Full=Dual specificity protein phosphatase 7	E9Q3P6	Q7TNL7_MOUSE	04125_1	371649	0.544392	F	80.47	cytoplasm nucleus endoplasmic reticulum	cell differentiation protein amino acid dephosphorylation	protein binding hydrolase activity protein tyrosine phosphatase activity kinase activity	MAPK signaling pathway
1959446	Patatin-like phospholipase domain-containing protein 2	Manual Assigned Name:Patatin-like phospholipase domain-containing protein 2 HPRD>11443_1>S428>Patatin like phospholipase domain containing 2 SwissPROT>PLPL2_MOUSE>S374>Isoform 3 of Patatin-like phospholipase domain-containing protein 2 OS=Mus musculus GN=Pnpla2 IPI>Q8BJ56>S430>Patatin-like phospholipase domain-containing protein 2 IPI>Q8BJ56-2>S430>Isoform 2 of Patatin-like phospholipase domain-c…	R.NNLS*LGDALAK.W	S430	UNI:Q8BJ56	1.62456	0.0105956	5.29762e+06	5.29762e+06	5271767	8336466	4467614	3114636	3.26095e+06	3469781	5244747	2457496	1871771	598.29	0.0150556	44.93	100	0.907744	2	0		81896337	Patatin-like phospholipase domain-containing protein 2 (Adipose triglyceride lipase) (Desnutrin)	Q8BJ56	PLPL2_MOUSE	11443_1	373907	0.0150556	F	44.93	integral to membrane	metabolic process	hydrolase activity
1959920	Guanine nucleotide-binding protein G(I)/G(S)/G(O) subunit gamma-12	Manual Assigned Name:Guanine nucleotide-binding protein G(I)/G(S)/G(O) subunit gamma-12 HPRD>13592_1>S26>Guanine nucleotide binding protein, gamma 12 SwissPROT>GBG12_MOUSE>S26>Guanine nucleotide-binding protein G(I)/G(S)/G(O) subunit gamma-12 OS=Mus musculus GN=Gng12 IPI>Q9DAS9>S26>Guanine nucleotide-binding protein G(I)/G(S)/G(O) subunit gamma-12 IPI>IPI00227838.4>S26>Gng12 Guanine nucleotide-bi…	R.LEAS*IER.I	S26*	UNI:Q9DAS9	1.61637	0.0285086	2.13311e+06	2.13311e+06	1916941	1829290	1547654	3238573	1.31969e+06	985060	1061420	654751	2577538	454.212	0.174121	24.97	100	0.510737	2	0		20138335	Guanine nucleotide-binding protein G(I)/G(S)/G(O) gamma-12 subunit	Q9DAS9	GBG12_MOUSE	13592_1	379958	0.174121	F	24.97	membrane	G-protein coupled receptor protein signaling pathway	signal transducer activity	Regulation of actin cytoskeleton Chemokine signaling pathway MAPK signaling pathway
1959224	Perilipin-1	Manual Assigned Name:Perilipin-1 HPRD>01364_1>S382>Perilipin SwissPROT>PLIN_MOUSE>S384>Perilipin (PERI) (Lipid droplet-associated protein) IPI>Q8CGN5>S384>Perilipin-1 IPI>Q8CGN5-2>S384>Isoform 2 of Perilipin-1 IPI>IPI00387480.1>S384>Plin Perilipin IPI>IPI00223783.2>S384>Plin1 Isoform 1 of Perilipin-1 IPI>IPI00947605.1>S384>Plin1 Isoform 2 of Perilipin-1 NCBI>261260072>S384>RecName: Full=Perilipin…	R.AMS*LSDALK.G	S384	UNI:Q8CGN5	1.61189	0.0264414	3.50088e+08	3.50088e+08	450947242	519569342	325540912	104294006	2.17191e+08	223232133	337780670	229547722	78205316	508.23	0.106356	59.34	44.6853	0.941277	2	0		261260072	RecName: Full=Perilipin-1; AltName: Full=Lipid droplet-associated protein; AltName: Full=Perilipin A	Q8CGN5	PLIN_MOUSE	01364_1	390074	0.0562316	F	59.34	lipid particle	lipid metabolic process	protein binding	PPAR signaling pathway
1958974	Protein phosphatase 1 regulatory subunit 12A	Manual Assigned Name:Protein phosphatase 1 regulatory subunit 12A HPRD>03606_1>S507>Myosin phosphatase target subunit 1 SwissPROT>MYPT1_MOUSE>S507>Isoform 2 of Protein phosphatase 1 regulatory subunit 12A OS=Mus musculus GN=Ppp1r12a IPI>Q9DBR7>S507>Protein phosphatase 1 regulatory subunit 12A IPI>Q9DBR7-2>S507>Isoform 2 of Protein phosphatase 1 regulatory subunit 12A IPI>IPI00671847.3>S507>Ppp1r1…	R.LAS*TSDIEEK.E	S507	UNI:Q9DBR7	1.60833	0.0246184	3.94661e+06	3.94661e+06	2600510	3695520	6608755	2881646	2.45386e+06	1199711	2295721	4411803	1908209	590.764	0.645477	67.73	27.6042	0.937447	2	0		281185473	RecName: Full=Protein phosphatase 1 regulatory subunit 12A; AltName: Full=Myosin phosphatase-targeting subunit 1; Short=Myosin phosphatase target subunit 1	Q9DBR7	MYPT1_MOUSE	03606_1	385473	0.599734	F	67.73	cytoplasm intracellular membrane-bounded organelle	integrin-mediated signaling pathway protein amino acid dephosphorylation	protein binding	Regulation of actin cytoskeleton Vascular smooth muscle contraction Focal adhesion Long-term potentiation
1959936	Protein phosphatase 1 regulatory subunit 12A	Manual Assigned Name:Protein phosphatase 1 regulatory subunit 12A HPRD>03606_1>S509>Myosin phosphatase target subunit 1 SwissPROT>MYPT1_MOUSE>S509>Isoform 2 of Protein phosphatase 1 regulatory subunit 12A OS=Mus musculus GN=Ppp1r12a IPI>Q9DBR7>S509>Protein phosphatase 1 regulatory subunit 12A IPI>Q9DBR7-2>S509>Isoform 2 of Protein phosphatase 1 regulatory subunit 12A IPI>IPI00671847.3>S509>Ppp1r1…	R.LASTS*DIEEK.E	S509	UNI:Q9DBR7	1.60833	0.0246184	3.94661e+06	3.94661e+06	2600510	3695520	6608755	2881646	2.45386e+06	1199711	2295721	4411803	1908209	586.758	0.394027	21.43	27.6042	0.684999	2	0		281185473	RecName: Full=Protein phosphatase 1 regulatory subunit 12A; AltName: Full=Myosin phosphatase-targeting subunit 1; Short=Myosin phosphatase target subunit 1	Q9DBR7	MYPT1_MOUSE	03606_1	385473	0.394027	F	21.43	cytoplasm intracellular membrane-bounded organelle	integrin-mediated signaling pathway protein amino acid dephosphorylation	protein binding	Regulation of actin cytoskeleton Vascular smooth muscle contraction Focal adhesion Long-term potentiation
1960103	Isoform PLEC-1A of Plectin	Manual Assigned Name:Isoform PLEC-1A of Plectin HPRD>03180_4>S20>Plectin 1 IPI>Q9QXS1-3>S20>Isoform PLEC-1A of Plectin IPI>IPI00400215.3>S20>Plec Isoform PLEC-1A of Plectin IPI>E9QMZ5>S20>Uncharacterized protein NCBI>6578739>S20>plectin isoform plec 1a [Mus musculus] NCBI>116283455>S20>Plec1 protein [Mus musculus] [MASS=77659] NCBI>40849928>S20>plectin 11 [Mus musculus] [MASS=517311] NCBI>2546752…	R.TS*SEDNLYLAVLR.A	S20	UNI:Q9QXS1-3	1.6076	0.0246184	3.95156e+06	3.95156e+06	2484972	5233367	4136355		2.45805e+06	1711063	3137997	2525099		520.915	0.0365214	57.71		0.926724	3	0		6578739	plectin isoform plec 1a [Mus musculus]	Q9QXS1-3	PLEC_MOUSE	03180_4		0.0365214	F	57.71	perinuclear region of cytoplasm	response to nutrient	actin binding
1959254	Protein phosphatase 1 regulatory subunit 12A	Manual Assigned Name:Protein phosphatase 1 regulatory subunit 12A SwissPROT>MYPT1_MOUSE>S299>Isoform 2 of Protein phosphatase 1 regulatory subunit 12A OS=Mus musculus GN=Ppp1r12a IPI>Q9DBR7>S299>Protein phosphatase 1 regulatory subunit 12A IPI>Q9DBR7-2>S299>Isoform 2 of Protein phosphatase 1 regulatory subunit 12A IPI>IPI00671847.3>S299>Ppp1r12a Isoform 1 of Protein phosphatase 1 regulatory subun…	K.S*PLIESTANMENNQPQK.A	S299	UNI:Q9DBR7	1.60333	0.0357724	5.4039e+06	5.4039e+06	5161528	6637739	8090411	1725924	3.37042e+06	3550215	4305451	4064098	1561914	990.939	1.40948	76.21	86.9402	0.959313	2	0		281185473	RecName: Full=Protein phosphatase 1 regulatory subunit 12A; AltName: Full=Myosin phosphatase-targeting subunit 1; Short=Myosin phosphatase target subunit 1	Q9DBR7	MYPT1_MOUSE		385473	0.425065	F	76.21	cytoplasm intracellular membrane-bounded organelle	integrin-mediated signaling pathway protein amino acid dephosphorylation	protein binding	Regulation of actin cytoskeleton Vascular smooth muscle contraction Focal adhesion Long-term potentiation
1959007	Eukaryotic translation initiation factor 4B	Manual Assigned Name:Eukaryotic translation initiation factor 4B HPRD>04892_1>S445>Eukaryotic translation initiation factor 4B SwissPROT>IF4B_MOUSE>S445>Eukaryotic translation initiation factor 4B OS=Mus musculus GN=Eif4b IPI>Q8BGD9>S445>Eukaryotic translation initiation factor 4B IPI>IPI00221581.1>S445>Eif4b Eukaryotic translation initiation factor 4B IPI>Q3TDD8>S445>Uncharacterized protein NCBI…	K.S*LENETLNK.E	S445*	UNI:Q8BGD9	1.60065	0.0345487	5.06699e+06	5.06699e+06	3514882	7092566	9024946	635571	3.16558e+06	2435573	4436609	5197189	592945	564.253	0.108204	45.4	67.4891	0.954386	2	0		55976513	Eukaryotic translation initiation factor 4B (eIF-4B)	Q8BGD9	IF4B_MOUSE	04892_1	388213	0.108204	F	45.4	nucleus integral to membrane cytoskeleton cytoplasm	translation transport phagocytosis oxidation reduction nucleosome assembly regulation of mitotic cell cycle	nucleotide binding translation initiation factor activity	mTOR signaling pathway
1959292	Microtubule-associated protein	Manual Assigned Name:Microtubule-associated protein SwissPROT>MAP4_MOUSE>S748>Isoform 4 of Microtubule-associated protein 4 OS=Mus musculus GN=Map4 IPI>E9PWC0>S748>Microtubule-associated protein IPI>E9PZ43>S748>Microtubule-associated protein IPI>E9QKJ8>S748>Microtubule-associated protein IPI>E9QPW8>S748>Microtubule-associated protein IPI>P27546>S748>Microtubule-associated protein 4 IPI>F7CK47>S74…	R.LATTVS*APDLK.S	S748*	UNI:E9PWC0	1.59024	0.00652705	5.93528e+06	5.93528e+06	5105306	7248058	6516578	4871191	3.73231e+06	3021231	4652081	4233502	3022430	598.303	0.910005	48.44	44.6853	0.937212	2	0		148887397	Microtubule-associated protein 4 (MAP 4)	E9PWC0	MAP4_MOUSE		377095	0.419874	F	48.44	microtubule	negative regulation of microtubule depolymerization	protein binding
1959060	Vasodilator-stimulated phosphoprotein	Manual Assigned Name:Vasodilator-stimulated phosphoprotein SwissPROT>VASP_MOUSE>Vasodilator-stimulated phosphoprotein OS=Mus musculus GN=Vasp IPI>P70460>Vasodilator-stimulated phosphoprotein IPI>IPI00624876.3>Vasp Vasodilator-stimulated phosphoprotein NCBI>90110086>Vasodilator-stimulated phosphoprotein (VASP) NCBI>16307367>vasodilator-stimulated phosphoprotein [Mus musculus] NCBI>15929731>vasodil…	K.S*SSSVTTSEAHPSTPCSSDDSDLER.V	S317	UNI:P70460	1.58174	0.0435299	1.032e+06	1.032e+06	1166022	1263996	1368581	329389	652443	384516	1159745	913869	151641	907.028	0.613813	37.31	13.8917	0.971001	3	0		90110086	Vasodilator-stimulated phosphoprotein (VASP)	P70460	VASP_MOUSE		376133	0.613813	F	37.31	membrane	actin cytoskeleton organization	protein binding	Fc gamma R-mediated phagocytosis Focal adhesion Leukocyte transendothelial migration
1959695	Vasodilator-stimulated phosphoprotein	Manual Assigned Name:Vasodilator-stimulated phosphoprotein SwissPROT>VASP_MOUSE>Vasodilator-stimulated phosphoprotein OS=Mus musculus GN=Vasp IPI>P70460>Vasodilator-stimulated phosphoprotein IPI>IPI00624876.3>Vasp Vasodilator-stimulated phosphoprotein NCBI>90110086>Vasodilator-stimulated phosphoprotein (VASP) NCBI>16307367>vasodilator-stimulated phosphoprotein [Mus musculus] NCBI>15929731>vasodil…	K.SSS*SVTTSEAHPSTPCSSDDSDLER.V	S319	UNI:P70460	1.58174	0.0435299	1.032e+06	1.032e+06	1166022	1263996	1368581	329389	652443	384516	1159745	913869	151641	910.362	1.16596	21.81		0.719685	3	0		90110086	Vasodilator-stimulated phosphoprotein (VASP)	P70460	VASP_MOUSE		376133	1.16596	F	21.81	membrane	actin cytoskeleton organization	protein binding	Fc gamma R-mediated phagocytosis Focal adhesion Leukocyte transendothelial migration
1959478	Tyrosine-protein phosphatase non-receptor type 12	Manual Assigned Name:Tyrosine-protein phosphatase non-receptor type 12 HPRD>02513_1>S435>Protein tyrosine phosphatase nonreceptor type 12 SwissPROT>PTN12_MOUSE>S434>Tyrosine-protein phosphatase non-receptor type 12 OS=Mus musculus GN=Ptpn12 SwissPROT>Q80UM4_MOUSE>S434>"Protein tyrosine phosphatase, non-receptor type 12 OS=Mus musculus GN=Ptpn12" IPI>P35831>S434>Tyrosine-protein phosphatase non-re…	R.NLS*FEIK.K	S434*	UNI:P35831	1.57709	0.0230352	1.60895e+07	1.60895e+07	8629143	23539427	17226685	14962829	1.02021e+07	5146139	13162586	10964014	11535491	465.72	0.367571	32.61	100	0.940325	2	0		1346902	Protein-tyrosine phosphatase, non-receptor type 12 (Protein-tyrosine phosphatase P19) (P19-PTP) (MPTP-PEST)	P35831	Q80UM4_MOUSE	02513_1	375381	0.109626	F	32.61	cytoplasm cytosol	protein amino acid dephosphorylation	protein binding
1960163	Serine/arginine repetitive matrix 1	Manual Assigned Name:Serine/arginine repetitive matrix 1 SwissPROT>A2A8V8_MOUSE>S577T579>Serine/arginine repetitive matrix 1 OS=Mus musculus GN=Srrm1 SwissPROT>A2A8V9_MOUSE>S586T588>Serine/arginine repetitive matrix 1 OS=Mus musculus GN=Srrm1 SwissPROT>A2A8W1_MOUSE>S36T38>Serine/arginine repetitive matrix 1 (Fragment) OS=Mus musculus GN=Srrm1 SwissPROT>SRRM1_MOUSE>S591T593>Isoform 2 of Serine/arg…	R.RRS*PT*PPPR.R	S577T579	UNI:A2A8V8	1.56925	0.0230352	3.1469e+06	3.1469e+06	1822583	3892595	3631334	3241093	2.00535e+06	1060921	2614955	2615707	1729822	418.528	0.236923	26.93	100	0.690064	3	0		347595715	RecName: Full=Serine/arginine repetitive matrix protein 1; AltName: Full=Plenty-of-prolines 101	A2A8V8	SRRM1_MOUSE		375402	0.236923	F	26.93	nucleus	mRNA processing	DNA binding zinc ion binding
1959245	Perilipin-1	Manual Assigned Name:Perilipin-1 SwissPROT>PLIN_MOUSE>S460>Perilipin (PERI) (Lipid droplet-associated protein) IPI>Q8CGN5>S460>Perilipin-1 IPI>IPI00387480.1>S460>Plin Perilipin IPI>IPI00223783.2>S460>Plin1 Isoform 1 of Perilipin-1 NCBI>261260072>S460>RecName: Full=Perilipin-1; AltName: Full=Lipid droplet-associated protein; AltName: Full=Perilipin A NCBI>148675108>S460>perilipin, isoform CRA_f [M…	R.GLS*APSCPGLDDK.T	S460	UNI:Q8CGN5	1.55741	0.0388827	2.49271e+07	2.49271e+07	28044519	27279325	36011018	8373578	1.60054e+07	12659349	17628001	26480832	7253609	698.794	0.667344	54.99	48.6251	0.8208	2	0		261260072	RecName: Full=Perilipin-1; AltName: Full=Lipid droplet-associated protein; AltName: Full=Perilipin A	Q8CGN5	PLIN_MOUSE		390074	0.488336	F	54.99	lipid particle	lipid metabolic process	protein binding	PPAR signaling pathway
1959767	Perilipin-1	Manual Assigned Name:Perilipin-1 SwissPROT>PLIN_MOUSE>S463>Perilipin (PERI) (Lipid droplet-associated protein) IPI>Q8CGN5>S463>Perilipin-1 IPI>IPI00387480.1>S463>Plin Perilipin IPI>IPI00223783.2>S463>Plin1 Isoform 1 of Perilipin-1 NCBI>261260072>S463>RecName: Full=Perilipin-1; AltName: Full=Lipid droplet-associated protein; AltName: Full=Perilipin A NCBI>148675108>S463>perilipin, isoform CRA_f [M…	R.GLSAPS*CPGLDDK.T	S463	UNI:Q8CGN5	1.55741	0.0388827	2.49271e+07	2.49271e+07	28044519	27279325	36011018	8373578	1.60054e+07	12659349	17628001	26480832	7253609	702.801	0.257725	24.71	11.1171	0.464607	2	0		261260072	RecName: Full=Perilipin-1; AltName: Full=Lipid droplet-associated protein; AltName: Full=Perilipin A	Q8CGN5	PLIN_MOUSE		390074	0.257725	F	24.71	lipid particle	lipid metabolic process	protein binding	PPAR signaling pathway
1959660	Calcium/calmodulin-dependent protein kinase type II subunit delta	Manual Assigned Name:Calcium/calmodulin-dependent protein kinase type II subunit delta HPRD>09653_1>T337>CaMK II delta subunit HPRD>09653_2>T337>CaMK II delta subunit HPRD>09653_3>T337>CaMK II delta subunit HPRD>09653_4>T337>CaMK II delta subunit SwissPROT>KCC2D_MOUSE>T371>Isoform 4 of Calcium/calmodulin-dependent protein kinase type II subunit delta OS=Mus musculus GN=Camk2d SwissPROT>Q8CCM0_MOU…	K.ESTESSNTT*IEDEDVK.A	T337*	UNI:Q6PHZ2	1.55085	0.0311323	1.10835e+06	1.10835e+06	875173	1388285	1175031	994927	714674	627239	693802	715323	822332	932.372	0.623479	46.52	12.0862	0.912496	2	0		81911483	Calcium/calmodulin-dependent protein kinase type II delta chain (CaM-kinase II delta chain) (CaM kinase II subunit delta) (CaMK-II subunit delta)	Q6PHZ2	Q8CCM0_MOUSE	09653_4	384960	0.623479	F	46.52	nucleus membrane intracellular	protein amino acid phosphorylation	protein binding ATP binding	Wnt signaling pathway Melanogenesis Calcium signaling pathway ErbB signaling pathway Neurotrophin signaling pathway Glioma GnRH signaling pathway Oocyte meiosis Long-term potentiation Olfactory transduction
1959702	Dclk1 protein	Manual Assigned Name:Dclk1 protein HPRD>09202_1>T336>Doublecortin and CaM kinase like 1 SwissPROT>A8IP62_MOUSE>T29>Activity and neurotransmitter-induced early gene protein 4 OS=Mus musculus GN=Dclk1 SwissPROT>DCAK1_MOUSE>T336>Serine/threonine-protein kinase DCAMKL1 (EC 2.7.1.37) (Doublecortin-like and CAM kinase-like 1) SwissPROT>DCLK1_MOUSE>T336>Isoform 2 of Serine/threonine-protein kinase DCLK1…	K.SPSPSPT*SPGSLR.K	T336	UNI:Q80VB6	1.54717	0.0285086	3.39541e+06	3.39541e+06	2784132	4508241	3831761	2457494	2.19459e+06	1682496	2603924	2325486	2166443	680.311	1.78139	43.15	10.9255	0.73685	2	0		20137987	Serine/threonine-protein kinase DCAMKL1 (Doublecortin-like and CAM kinase-like 1)	Q80VB6	Q9JLM7_MOUSE	09202_1	380814	1.78139	F	43.15	nucleus integral to plasma membrane integral to membrane intracellular	protein amino acid phosphorylation brain development transport intracellular signaling cascade	ATP binding protein binding guanyl-nucleotide exchange factor activity kinase activity transferase activity
1960317	Dclk1 protein	Manual Assigned Name:Dclk1 protein HPRD>09202_1>S337>Doublecortin and CaM kinase like 1 SwissPROT>A8IP62_MOUSE>S30>Activity and neurotransmitter-induced early gene protein 4 OS=Mus musculus GN=Dclk1 SwissPROT>DCAK1_MOUSE>S337>Serine/threonine-protein kinase DCAMKL1 (EC 2.7.1.37) (Doublecortin-like and CAM kinase-like 1) SwissPROT>DCLK1_MOUSE>S337>Isoform 2 of Serine/threonine-protein kinase DCLK1…	K.SPSPSPTS*PGSLR.K	S337	UNI:Q80VB6	1.54717	0.0285086	3.39541e+06	3.39541e+06	2784132	4508241	3831761	2457494	2.19459e+06	1682496	2603924	2325486	2166443	675.309	0.709834	29.53	9.77724	0.238556	2	0		20137987	Serine/threonine-protein kinase DCAMKL1 (Doublecortin-like and CAM kinase-like 1)	Q80VB6	Q9JLM7_MOUSE	09202_1	380814	0.709834	F	29.53	nucleus integral to plasma membrane integral to membrane intracellular	protein amino acid phosphorylation brain development transport intracellular signaling cascade	ATP binding protein binding guanyl-nucleotide exchange factor activity kinase activity transferase activity
1959650	Na(+)/H(+) exchange regulatory cofactor NHE-RF1	Manual Assigned Name:Na(+)/H(+) exchange regulatory cofactor NHE-RF1 SwissPROT>NHERF_MOUSE>S284>Ezrin-radixin-moesin binding phosphoprotein 50 (EBP50) (Na(+)/H(+) exchange regulatory cofactor NHE-RF) (NHERF-1) (Regulatory cofactor of Na(+)/H(+) exchanger) (Sodium-hydrogen exchanger regulatory factor 1) (Solute carrier family 9 IPI>P70441>S285>Na(+)/H(+) exchange regulatory cofactor NHE-RF1 IPI>IP…	R.SAS*SDTSEELNSQDSPK.R	S285*	UNI:P70441	1.54656	0.026975	1.85452e+06	1.85452e+06	1111319	2816910	2327864	1161991	1.19913e+06	591664	1728960	1509051	966834	931.37	0.930317	110.75	16.9461	0.935842	2	0		41688568	Ezrin-radixin-moesin binding phosphoprotein 50 (EBP50) (Na(+)/H(+) exchange regulatory cofactor NHE-RF) (NHERF-1) (Regulatory cofactor of Na(+)/H(+) exchanger) (Sodium-hydrogen exchanger regulatory factor 1) (Solute carrier family 9 isoform 3 regulatory factor 1)	P70441	NHERF_MOUSE		372022	0.210556	F	110.75	membrane	Wnt receptor signaling pathway	protein binding
1959960	Charged multivesicular body protein 2b	Manual Assigned Name:Charged multivesicular body protein 2b HPRD>13174_1>S199>DKFZP564O123 protein SwissPROT>CHM2B_MOUSE>S199>Charged multivesicular body protein 2b OS=Mus musculus GN=Chmp2b IPI>Q8BJF9>S199>Charged multivesicular body protein 2b IPI>IPI00222386.3>S199>Chmp2b Charged multivesicular body protein 2b NCBI>73917747>S199>Charged multivesicular body protein 2b (Chromatin-modifying prote…	K.ATIS*DEEIER.Q	S199*	UNI:Q8BJF9	1.53922	0.0275759	2.58949e+06	2.58949e+06	2827201	2921997	2757491	1851275	1.68234e+06	1382461	2295012	1806480	1245420	621.767	1.01245	37.08	32.1312	0.904749	2	0		73917747	Charged multivesicular body protein 2b (Chromatin-modifying protein 2b) (CHMP2b)	Q8BJF9	CHM2B_MOUSE	13174_1	370263	1.01245	F	37.08	membrane microsome	transport protein transport	protein domain specific binding protein binding metal ion binding	Endocytosis
1958837	Palladin	Manual Assigned Name:Palladin HPRD>09731_1>S892S894S897>Palladin SwissPROT>PALLD_MOUSE>S1124S1126S1129>Isoform 6 of Palladin OS=Mus musculus GN=Palld SwissPROT>Q8C306_MOUSE>S291S293S296>Putative uncharacterized protein (Fragment) OS=Mus musculus GN=Palld IPI>Q9ET54>S1141S1143S1146>Palladin IPI>Q9ET54-2>S1141S1143S1146>Isoform 2 of Palladin IPI>Q9ET54-3>S1141S1143S1146>Isoform 3 of Palladin IPI>Q9…	R.S*RS*RDS*GDENEPIQER.F	S1141S1143S1146*	UNI:Q9ET54	1.53901	0.02673	1.05885e+06	1.05885e+06	665842	912869	1440847	1215839	688008	405230	762291	788179	796333	715.599	0.439206	55.05	100	0.955136	3	0		158564030	Palladin [MASS=152130]	Q9ET54	Q8C306_MOUSE	09731_1	376686	0.0993108	F	55.05	cytoplasm nucleus	protein amino acid phosphorylation cytoskeleton organization	actin binding protein binding
1958866	5'-3' exoribonuclease 2	Manual Assigned Name:5'-3' exoribonuclease 2 HPRD>10309_1>S499S501>5`-3` exoribonuclease 2 SwissPROT>XRN2_MOUSE>S499S501>Isoform 2 of 5'-3' exoribonuclease 2 OS=Mus musculus GN=Xrn2 IPI>Q9DBR1>S499S501>5'-3' exoribonuclease 2 IPI>Q9DBR1-2>S499S501>Isoform 2 of 5'-3' exoribonuclease 2 IPI>IPI00120046.1>S499S501>Xrn2 Isoform 1 of 5'-3' exoribonuclease 2 IPI>IPI00283057.1>S499S501>Xrn2 Isoform 2 of …	R.KAEDS*DS*EPEPEDNVR.L	S499S501*	UNI:Q9DBR1	1.53896	0.0314417	1.3494e+06	1.3494e+06	764983	1835087	1807082	990441	876824	444484	1080918	1080146	901750	988.86	1.18479	36.96	100	0.247481	2	0		30173483	5'-3' exoribonuclease 2 (Dhm1 protein)	Q9DBR1	XRN2_MOUSE	10309_1	374733	0.941967	F	36.96	nucleus	regulation of transcription	protein binding	RNA degradation
1960367	Cobl-like 1	Manual Assigned Name:Cobl-like 1 SwissPROT>B1AZ14_MOUSE>S1183>Cobl-like 1 OS=Mus musculus GN=Cobll1 SwissPROT>B1AZ15_MOUSE>S1182>Cobl-like 1 OS=Mus musculus GN=Cobll1 SwissPROT>COBL1_MOUSE>S1145>Isoform 4 of Cordon-bleu protein-like 1 OS=Mus musculus GN=Cobll1 IPI>B1AZ14>S1183>Cobl-like 1 IPI>B1AZ15>S1183>Cobl-like 1 IPI>Q3UMF0>S1183>Cordon-bleu protein-like 1 IPI>Q3UMF0-2>S1183>Isoform 2 of Cord…	R.QSS*LTFQSSDPEHVR.Q	S1183	UNI:B1AZ14	1.53746	0.0335436	3.4577e+06	3.4577e+06	5035504	3518921	4043791	1232570	2.24897e+06	3402717	2228129	2235409	1129622	899.394	0.212484	22.57		0.813615	2	0		118568015	Cordon-bleu protein-like 1 (Cobl-related protein 1) [MASS=137381]	B1AZ14	COBL1_MOUSE		386496	0.212484	F	22.57
1958848	PC4 and SFRS1-interacting protein	Manual Assigned Name:PC4 and SFRS1-interacting protein HPRD>04688_1>S106>PC4 and SFRS1 interacting protein 1 HPRD>04688_2>S106>PC4 and SFRS1 interacting protein 1 SwissPROT>A2BI12_MOUSE>S106>PC4 and SFRS1 interacting protein 1 OS=Mus musculus GN=Psip1 SwissPROT>PSIP1_MOUSE>S106>Isoform 2 of PC4 and SFRS1-interacting protein OS=Mus musculus GN=Psip1 IPI>Q99JF8>S106>PC4 and SFRS1-interacting protei…	K.QSNASS*DVEVEEK.E	S106*	UNI:Q99JF8	1.53226	0.0186539	3.19524e+06	3.19524e+06	3207483	3118416	3495021	2960028	2.08532e+06	1976255	1881173	2263378	2220457	751.306	0.707244	61.21	19.0849	0.93319	2	0		68565928	PC4 and SFRS1-interacting protein (Lens epithelium-derived growth factor) (mLEDGF)	Q99JF8	PSIP1_MOUSE	04688_2	375244	0.141182	F	61.21	nucleus	regulation of transcription	DNA binding
1959895	PC4 and SFRS1-interacting protein	Manual Assigned Name:PC4 and SFRS1-interacting protein HPRD>04688_1>S105>PC4 and SFRS1 interacting protein 1 HPRD>04688_2>S105>PC4 and SFRS1 interacting protein 1 SwissPROT>A2BI12_MOUSE>S105>PC4 and SFRS1 interacting protein 1 OS=Mus musculus GN=Psip1 SwissPROT>PSIP1_MOUSE>S105>Isoform 2 of PC4 and SFRS1-interacting protein OS=Mus musculus GN=Psip1 IPI>Q99JF8>S105>PC4 and SFRS1-interacting protei…	K.QSNAS*SDVEVEEK.E	S105*	UNI:Q99JF8	1.53226	0.0186539	3.19524e+06	3.19524e+06	3207483	3118416	3495021	2960028	2.08532e+06	1976255	1881173	2263378	2220457	751.307	0.424878	32.52	48.3877	0.802287	2	0		68565928	PC4 and SFRS1-interacting protein (Lens epithelium-derived growth factor) (mLEDGF)	Q99JF8	PSIP1_MOUSE	04688_2	375244	0.424878	F	32.52	nucleus	regulation of transcription	DNA binding
1959384	FACT complex subunit SSRP1	Manual Assigned Name:FACT complex subunit SSRP1 SwissPROT>A2AW05_MOUSE>S444>Structure specific recognition protein 1 (Fragment) OS=Mus musculus GN=Ssrp1 SwissPROT>SSRP_MOUSE>S444>Structure-specific recognition protein 1 (SSRP1) (Recombination signal sequence recognition protein) (T160) SwissPROT>SSRP1_MOUSE>S444>Isoform 2 of FACT complex subunit SSRP1 OS=Mus musculus GN=Ssrp1 IPI>Q08943>S444>FACT…	K.EGINPGYDDYADS*DEDQHDAYLER.M	S444*	UNI:Q08943	1.52654	0.0252585	4.66494e+06	4.66494e+06	1160413	6539810	4600180	6359356	3.0559e+06	935955	4734708	2647186	3905747	956.371	1.37003	25.37	9.16454	0.869655	3	0		110283006	FACT complex subunit SSRP1 (Facilitates chromatin transcription complex subunit SSRP1) (Structure-specific recognition protein 1) (Recombination signal sequence recognition protein 1) (T160)	Q08943	SSRP1_MOUSE		374565	1.37003	F	25.37	nucleus	regulation of transcription transport	DNA binding protein binding
1960179	Acin1 protein	Manual Assigned Name:Acin1 protein HPRD>05191_1>S898>ACINUS SwissPROT>B8JJ87_MOUSE>S898>Apoptotic chromatin condensation inducer 1 OS=Mus musculus GN=Acin1 SwissPROT>B8JJ88_MOUSE>S831>Apoptotic chromatin condensation inducer 1 (Fragment) OS=Mus musculus GN=Acin1 SwissPROT>B8JJ90_MOUSE>S195>Apoptotic chromatin condensation inducer 1 (Fragment) OS=Mus musculus GN=Acin1 SwissPROT>B8JJ91_MOUSE>S194>A…	R.IS*EDETER.N	S112	UNI:Q52KR6	1.52153	0.0355	642048	642048	500049	844181	1032673	191289	421974	300929	565427	756652	64890	529.705	1.85374	22.71	42.3872	0.856992	2	0		341940614	RecName: Full=Apoptotic chromatin condensation inducer in the nucleus; Short=Acinus	Q52KR6	Q52KR6_MOUSE	05191_1	372668	1.85374	F	22.71	nucleus nucleolus intracellular	apoptosis erythrocyte differentiation response to protein stimulus protein amino acid dephosphorylation	nucleotide binding nucleic acid binding	Spliceosome
1959026	Ahnak AHNAK nucleoprotein isoform 1	Manual Assigned Name:Ahnak AHNAK nucleoprotein isoform 1 HPRD>14684_2>S5731>AHNAK nucleoprotein (desmoyokin) IPI>IPI00553798.2>S5504>Ahnak AHNAK nucleoprotein isoform 1 IPI>E9Q1H8>S5504>Uncharacterized protein IPI>E9Q616>S5504>Uncharacterized protein NCBI>34766351>S525>AHNAK [Mus musculus] [MASS=68761] NCBI>18204820>S872>AA589382 protein [Mus musculus] NCBI>61743961>S5504>AHNAK nucleoprotein isof…	K.GGVTGS*PEASISGSK.G	S5504	UNI:IPI00553798.2	1.5147	0.0110482	1.60723e+07	1.60723e+07	10806454	17739730	21423475	14319666	1.06109e+07	7006927	11018169	13997673	10420932	707.317	0.0339552	73.73	60.386	0.687589	2	0		34766351	AHNAK [Mus musculus] [MASS=68761]	IPI00553798.2		14684_2		0.0339552	F	73.73	nucleus	nervous system development	protein binding
1958629	DnaJ homolog subfamily C member 5	Manual Assigned Name:DnaJ homolog subfamily C member 5 HPRD>08539_1>S10>Cysteine string protein SwissPROT>A2AUE1_MOUSE>S10>"DnaJ (Hsp40) homolog, subfamily C, member 5 (Fragment) OS=Mus musculus GN=Dnajc5" SwissPROT>DNJC5_MOUSE>S10>DnaJ homolog subfamily C member 5 OS=Mus musculus GN=Dnajc5 IPI>P60904>S10>DnaJ homolog subfamily C member 5 IPI>A2AUE1>S10>DnaJ (Hsp40) homolog, subfamily C, member 5…	R.SLS*TSGESLYHVLGLDK.N	S10*	UNI:P60904	1.51431	0.0473054	1.8303e+07	1.8303e+07	14042017	25514733	15352110		1.20867e+07	12501324	21215453	14573671	56171	943.451	0.608729	49.35	16.9461	0.889761	2	0		46397410	DnaJ homolog subfamily C member 5 (Cysteine string protein) (CSP)	P60904	DNJC5_MOUSE	08539_1	391386	0.608729	F	49.35	membrane plasma membrane	protein folding	unfolded protein binding
1960107	DnaJ homolog subfamily C member 5	Manual Assigned Name:DnaJ homolog subfamily C member 5 HPRD>08539_1>S8>Cysteine string protein SwissPROT>A2AUE1_MOUSE>S8>"DnaJ (Hsp40) homolog, subfamily C, member 5 (Fragment) OS=Mus musculus GN=Dnajc5" SwissPROT>DNJC5_MOUSE>S8>DnaJ homolog subfamily C member 5 OS=Mus musculus GN=Dnajc5 IPI>P60904>S8>DnaJ homolog subfamily C member 5 IPI>A2AUE1>S8>DnaJ (Hsp40) homolog, subfamily C, member 5 (Fra…	R.S*LSTSGESLYHVLGLDK.N	S8*	UNI:P60904	1.51431	0.0473054	1.8303e+07	1.8303e+07	14042017	25514733	15352110		1.20867e+07	12501324	21215453	14573671	56171	947.458	0.326309	75.58	7.44727	0.961545	2	0		46397410	DnaJ homolog subfamily C member 5 (Cysteine string protein) (CSP)	P60904	DNJC5_MOUSE	08539_1	391386	0.326309	F	75.58	membrane plasma membrane	protein folding	unfolded protein binding
1960228	Ras GTPase-activating protein 3	Manual Assigned Name:Ras GTPase-activating protein 3 HPRD>05537_1>S809>Ras p21 protein activator 3 SwissPROT>Q3UGJ5_MOUSE>S809>Putative uncharacterized protein OS=Mus musculus GN=Rasa3 SwissPROT>RASA3_MOUSE>S809>Ras GTPase-activating protein 3 OS=Mus musculus GN=Rasa3 IPI>Q60790>S809>Ras GTPase-activating protein 3 IPI>IPI00468396.3>S809>Rasa3 Ras GTPase-activating protein 3 IPI>IPI00816935.4>S80…	R.YGS*QEHPIGDK.S	S809	UNI:Q60790	1.51304	0.0246184	1.256e+06	1.256e+06	1157009	1501039	1299381	1066568	830116	613011	1089391	824680	793382	437.519	0.115983	20.87	7.60422	0.741198	3	0		13959565	Ras GTPase-activating protein 3 (GAP1(IP4BP)) (Ins P4-binding protein) (GapIII)	Q60790	RASA3_MOUSE	05537_1	376587	0.115983	F	20.87	membrane intracellular	signal transduction	zinc ion binding GTPase activator activity	MAPK signaling pathway - fly
1959672	NEDD9-interacting protein with calponin homology and LIM domains	Manual Assigned Name:NEDD9-interacting protein with calponin homology and LIM domains SwissPROT>MICA1_MOUSE>S777>NEDD9-interacting protein with calponin homology and LIM domains OS=Mus musculus GN=Mical1 SwissPROT>Q3TX89_MOUSE>S704>Putative uncharacterized protein OS=Mus musculus GN=Mical1 IPI>Q8VDP3>S777>NEDD9-interacting protein with calponin homology and LIM domains IPI>IPI00116371.4>S777>Mica…	R.VS*PVPSPSQPAR.R	S777	UNI:Q8VDP3	1.50865	0.0246184	2.31511e+06	2.31511e+06	2109268	3170770	2694292	1286113	1.53456e+06	1462331	2028452	1592958	1054502	651.316	0.267358	21.17	58.0006	0.632366	2	0		46396473	NEDD9 interacting protein with calponin homology and LIM domains (Molecule interacting with CasL protein 1) [MASS=116784]	Q8VDP3	Q3TX89_MOUSE		371588	0.267358	F	21.17	cytoplasm extracellular region	oxidation reduction proteolysis	protein binding zinc ion binding
1959570	Serine/arginine repetitive matrix 1	Manual Assigned Name:Serine/arginine repetitive matrix 1 SwissPROT>A2A8V8_MOUSE>S401T404>Serine/arginine repetitive matrix 1 OS=Mus musculus GN=Srrm1 SwissPROT>A2A8V9_MOUSE>S396T399>Serine/arginine repetitive matrix 1 OS=Mus musculus GN=Srrm1 SwissPROT>SRRM1_MOUSE>S401T404>Isoform 2 of Serine/arginine repetitive matrix protein 1 OS=Mus musculus GN=Srrm1 IPI>A2A8V8>S401T404>Serine/arginine repetit…	R.HRPSS*PAT*PPPK.T	S401T404*	UNI:A2A8V8	1.50842	0.0275759	445283	445283	257299	536711	541363	445759	295199	153468	300819	343593	382915	716.312	1.39143	36.34	16.432	0.676828	2	0		347595715	RecName: Full=Serine/arginine repetitive matrix protein 1; AltName: Full=Plenty-of-prolines 101	A2A8V8	SRRM1_MOUSE		375402	1.39143	F	36.34	nucleus	mRNA processing	DNA binding zinc ion binding
1959571	Serine/arginine repetitive matrix 1	Manual Assigned Name:Serine/arginine repetitive matrix 1 SwissPROT>A2A8V8_MOUSE>S400T404>Serine/arginine repetitive matrix 1 OS=Mus musculus GN=Srrm1 SwissPROT>A2A8V9_MOUSE>S395T399>Serine/arginine repetitive matrix 1 OS=Mus musculus GN=Srrm1 SwissPROT>SRRM1_MOUSE>S400T404>Isoform 2 of Serine/arginine repetitive matrix protein 1 OS=Mus musculus GN=Srrm1 IPI>A2A8V8>S400T404>Serine/arginine repetit…	R.HRPS*SPAT*PPPK.T	S400T404*	UNI:A2A8V8	1.50842	0.0275759	445283	445283	257299	536711	541363	445759	295199	153468	300819	343593	382915	725.324	0.291107	37.35	14.8675	0.814153	2	0		347595715	RecName: Full=Serine/arginine repetitive matrix protein 1; AltName: Full=Plenty-of-prolines 101	A2A8V8	SRRM1_MOUSE		375402	0.291107	F	37.35	nucleus	mRNA processing	DNA binding zinc ion binding
1958957	PC4 and SFRS1-interacting protein	Manual Assigned Name:PC4 and SFRS1-interacting protein SwissPROT>A2BI12_MOUSE>S272S274>PC4 and SFRS1 interacting protein 1 OS=Mus musculus GN=Psip1 SwissPROT>PSIP1_MOUSE>S272S274>Isoform 2 of PC4 and SFRS1-interacting protein OS=Mus musculus GN=Psip1 IPI>Q99JF8>S272S274>PC4 and SFRS1-interacting protein IPI>A2BI12>S272S274>PC4 and SFRS1 interacting protein 1 IPI>Q99JF8-2>S272S274>Isoform 2 of PC4…	K.NLAKPGVTSTS*DS*EDEDDQEGEK.K	S272S274*	UNI:Q99JF8	1.5059	0.010407	6.84343e+06	6.84343e+06	3230219	9829727	8336761	5977029	4.54441e+06	1999474	6858491	5223408	4096248	871.003	0.345845	44.61	30.1171	0.261372	3	0		68565928	PC4 and SFRS1-interacting protein (Lens epithelium-derived growth factor) (mLEDGF)	Q99JF8	PSIP1_MOUSE		375244	0.217158	F	44.61	nucleus	regulation of transcription	DNA binding
1959666	PC4 and SFRS1-interacting protein	Manual Assigned Name:PC4 and SFRS1-interacting protein SwissPROT>A2BI12_MOUSE>T271S274>PC4 and SFRS1 interacting protein 1 OS=Mus musculus GN=Psip1 SwissPROT>PSIP1_MOUSE>T271S274>Isoform 2 of PC4 and SFRS1-interacting protein OS=Mus musculus GN=Psip1 IPI>Q99JF8>T271S274>PC4 and SFRS1-interacting protein IPI>A2BI12>T271S274>PC4 and SFRS1 interacting protein 1 IPI>Q99JF8-2>T271S274>Isoform 2 of PC4…	K.NLAKPGVTST*SDS*EDEDDQEGEK.K	T271S274*	UNI:Q99JF8	1.5059	0.010407	6.84343e+06	6.84343e+06	3230219	9829727	8336761	5977029	4.54441e+06	1999474	6858491	5223408	4096248	876.346	1.21088	46.16	11.0744	0.55548	3	0		68565928	PC4 and SFRS1-interacting protein (Lens epithelium-derived growth factor) (mLEDGF)	Q99JF8	PSIP1_MOUSE		375244	1.21088	F	46.16	nucleus	regulation of transcription	DNA binding
1959922	PC4 and SFRS1-interacting protein	Manual Assigned Name:PC4 and SFRS1-interacting protein SwissPROT>A2BI12_MOUSE>T269S274>PC4 and SFRS1 interacting protein 1 OS=Mus musculus GN=Psip1 SwissPROT>PSIP1_MOUSE>T269S274>Isoform 2 of PC4 and SFRS1-interacting protein OS=Mus musculus GN=Psip1 IPI>Q99JF8>T269S274>PC4 and SFRS1-interacting protein IPI>A2BI12>T269S274>PC4 and SFRS1 interacting protein 1 IPI>Q99JF8-2>T269S274>Isoform 2 of PC4…	K.NLAKPGVT*STSDS*EDEDDQEGEK.K	T269S274*	UNI:Q99JF8	1.5059	0.010407	6.84343e+06	6.84343e+06	3230219	9829727	8336761	5977029	4.54441e+06	1999474	6858491	5223408	4096248	871.003	0.625049	29.39	16.1375	0.394343	3	0		68565928	PC4 and SFRS1-interacting protein (Lens epithelium-derived growth factor) (mLEDGF)	Q99JF8	PSIP1_MOUSE		375244	0.625049	F	29.39	nucleus	regulation of transcription	DNA binding
1959923	PC4 and SFRS1-interacting protein	Manual Assigned Name:PC4 and SFRS1-interacting protein SwissPROT>A2BI12_MOUSE>S270T271>PC4 and SFRS1 interacting protein 1 OS=Mus musculus GN=Psip1 SwissPROT>PSIP1_MOUSE>S270T271>Isoform 2 of PC4 and SFRS1-interacting protein OS=Mus musculus GN=Psip1 IPI>Q99JF8>S270T271>PC4 and SFRS1-interacting protein IPI>A2BI12>S270T271>PC4 and SFRS1 interacting protein 1 IPI>Q99JF8-2>S270T271>Isoform 2 of PC4…	K.NLAKPGVTS*T*SDSEDEDDQEGEK.K	S270T271*	UNI:Q99JF8	1.5059	0.010407	6.84343e+06	6.84343e+06	3230219	9829727	8336761	5977029	4.54441e+06	1999474	6858491	5223408	4096248	876.346	0.864857	34.98	2.2973	0.249041	3	0		68565928	PC4 and SFRS1-interacting protein (Lens epithelium-derived growth factor) (mLEDGF)	Q99JF8	PSIP1_MOUSE		375244	0.864857	F	34.98	nucleus	regulation of transcription	DNA binding
1960441	Oxysterol-binding protein-related protein 11	Manual Assigned Name:Oxysterol-binding protein-related protein 11 SwissPROT>OSB11_MOUSE>S194>Oxysterol-binding protein-related protein 11 OS=Mus musculus GN=Osbpl11 SwissPROT>OSR11_MOUSE>S194>Oxysterol binding protein-related protein 11 (OSBP-related protein 11) (ORP-11) IPI>Q8CI95>S194>Oxysterol-binding protein-related protein 11 IPI>IPI00229798.2>S194>Osbpl11 oxysterol binding protein-like 11 I…	R.RPS*QNAMSFFNVGHSK.L	S194*	UNI:Q8CI95	1.5021	0.0379721	5.66994e+06	5.66994e+06	6604814	7585597	3655623	4833720	3.77468e+06	3548517	4355372	2881102	4313718	629.617	0.242204	36.62	44.8275	0.793756	3	0		46396418	Oxysterol binding protein-related protein 11 (OSBP-related protein 11) (ORP-11) [MASS=83629]	Q8CI95	OSR11_MOUSE		378244	0.242204	F	36.62	endoplasmic reticulum lumen	transport	protein binding
1960405	Dclk1 protein	Manual Assigned Name:Dclk1 protein HPRD>09202_1>S32T34>Doublecortin and CaM kinase like 1 SwissPROT>DCAK1_MOUSE>S32T34>Serine/threonine-protein kinase DCAMKL1 (EC 2.7.1.37) (Doublecortin-like and CAM kinase-like 1) SwissPROT>DCLK1_MOUSE>S32T34>Isoform 2 of Serine/threonine-protein kinase DCLK1 OS=Mus musculus GN=Dclk1 SwissPROT>Q8BRN4_MOUSE>S32T34>Putative uncharacterized protein OS=Mus musculus …	R.VNGLPS*PT*HSAHCSFYR.T	S32T34	UNI:Q80VB6	1.49678	0.0342506	2.99107e+07	2.99107e+07	12506755	42171504	33074719	31889806	1.99833e+07	7919623	23636935	18688149	29688567	697.283	0.632586	21.79	10.4416	0.923212	3	0		20137987	Serine/threonine-protein kinase DCAMKL1 (Doublecortin-like and CAM kinase-like 1)	Q80VB6	Q9JLM7_MOUSE	09202_1	380814	0.632586	F	21.79	integral to plasma membrane nucleus intracellular	protein amino acid phosphorylation intracellular signaling cascade	protein binding ATP binding kinase activity transferase activity
1959707	Serine/arginine repetitive matrix 1	Manual Assigned Name:Serine/arginine repetitive matrix 1 SwissPROT>A2A8V8_MOUSE>S558S560>Serine/arginine repetitive matrix 1 OS=Mus musculus GN=Srrm1 SwissPROT>A2A8V9_MOUSE>S567S569>Serine/arginine repetitive matrix 1 OS=Mus musculus GN=Srrm1 SwissPROT>A2A8W1_MOUSE>S17S19>Serine/arginine repetitive matrix 1 (Fragment) OS=Mus musculus GN=Srrm1 SwissPROT>SRRM1_MOUSE>S572S574>Isoform 2 of Serine/arg…	R.S*PS*PAPPPPPPPPPPR.R	S558S560*	UNI:A2A8V8	1.49582	0.0461343	1.89718e+07	1.89718e+07	15368123	24935955	20965940	14617213	1.26832e+07	12129687	16624852	8963391	13014969	585.603	0.0837705	31.96	100	0.841541	3	0		347595715	RecName: Full=Serine/arginine repetitive matrix protein 1; AltName: Full=Plenty-of-prolines 101	A2A8V8	SRRM1_MOUSE		375402	0.0837705	F	31.96	nucleus	mRNA processing	DNA binding zinc ion binding
1959368	1-phosphatidylinositol-3-phosphate 5-kinase	Manual Assigned Name:1-phosphatidylinositol-3-phosphate 5-kinase HPRD>17852_1>S307>Phosphatidylinositol-3-phosphate/phosphatidylinositol 5-kinase type III HPRD>17852_3>S210>Phosphatidylinositol-3-phosphate/phosphatidylinositol 5-kinase type III SwissPROT>D3Z5N5_MOUSE>S318>Uncharacterized protein OS=Mus musculus GN=Pikfyve SwissPROT>FYV1_MOUSE>S307>Isoform 3 of 1-phosphatidylinositol-3-phosphate 5…	R.SAS*ITNLSLDR.S	S307	UNI:Q9Z1T6	1.49343	0.0246184	2.5738e+07	2.5738e+07	20654475	34789353	26196923	21311446	1.72341e+07	11576710	21703875	18601122	17054865	628.798	0.961332	60.11	13.8039	0.968524	2	0		341941090	RecName: Full=1-phosphatidylinositol-3-phosphate 5-kinase; Short=Phosphatidylinositol-3-phosphate 5-kinase; AltName: Full=FYVE finger-containing phosphoinositide kinase; AltName: Full=PIKfyve; AltName: Full=Phosphatidylinositol-3-phosphate 5-kinase type III; Short=PIPkin-III; Short=Type III PIP kinase; AltName: Full=p235	Q9Z1T6	FYV1_MOUSE	17852_3	391348	0.085947	F	60.11	membrane plasma membrane integral to membrane	intracellular signaling cascade	protein binding prenylcysteine oxidase activity zinc ion binding kinase activity	Inositol phosphate metabolism Phosphatidylinositol signaling system Endocytosis Fc gamma R-mediated phagocytosis Regulation of actin cytoskeleton
1958742	Hmga2 protein	Manual Assigned Name:Hmga2 protein SwissPROT>HMGA2_MOUSE>S44>High mobility group protein HMGI-C OS=Mus musculus GN=Hmga2 SwissPROT>HMGIC_MOUSE>S44>High mobility group protein HMGI-C (High mobility group AT-hook 2) SwissPROT>Q6NSP9_MOUSE>S44>Hmga2 protein OS=Mus musculus GN=Hmga2 IPI>Q6NSP9>S44>Hmga2 protein IPI>P52927>S44>High mobility group protein HMGI-C IPI>IPI00331612.3>S44>Hmga2 High mobilit…	K.QQQEPTCEPS*PK.R	S44*	UNI:Q6NSP9	1.4928	0.0230352	937390	937390	805368	1178495	1299831	465869	627939	571024	673090	964290	303354	758.815	0.752989	30.34	32.6992	0.939714	2	0		1708264	High mobility group protein HMGI-C (High mobility group AT-hook 2)	Q6NSP9	Q6NSP9_MOUSE		394387	0.588149	F	30.34	nucleus	regulation of transcription, DNA-dependent	protein binding DNA binding
1959463	Thyroid hormone receptor-associated protein 3	Manual Assigned Name:Thyroid hormone receptor-associated protein 3 HPRD>07543_1>S682>TRAP150 SwissPROT>Q8BZN7_MOUSE>S679>Putative uncharacterized protein OS=Mus musculus GN=Thrap3 SwissPROT>Q91VL2_MOUSE>S293>Thrap3 protein (Fragment) OS=Mus musculus GN=Thrap3 SwissPROT>TR150_MOUSE>S679>Thyroid hormone receptor-associated protein 3 OS=Mus musculus GN=Thrap3 IPI>Q569Z6>S679>Thyroid hormone receptor…	R.IDIS*PSTFR.K	S679*	UNI:Q569Z6	1.48857	0.00588589	9.30615e+07	9.30615e+07	89705771	120135776	100930791	61473611	6.25172e+07	60507901	80221285	66677852	42661813	563.265	0.762313	58.69	26.0224	0.906213	2	0		81882407	Thyroid hormone receptor-associated protein 3 (Thyroid hormone receptor-associated protein complex 150 kDa component) (Trap150)	Q569Z6	TR150_MOUSE	07543_1	388931	0.00177695	F	58.69	nucleus mediator complex	regulation of transcription transcription from RNA polymerase II promoter positive regulation of transcription from RNA polymerase II promoter	protein binding ATP binding receptor activity
1960214	RNA-binding protein 25	Manual Assigned Name:RNA-binding protein 25 HPRD>15229_1>S677>RNA binding motif protein 25 IPI>B2RY56>S675>RNA-binding protein 25 IPI>B2RY56-2>S675>Isoform 2 of RNA-binding protein 25 IPI>IPI00421119.5>S675>Rbm25 Isoform 1 of RNA-binding protein 25 IPI>IPI00928541.1>S675>Rbm25 Isoform 2 of RNA-binding protein 25 NCBI>226736666>S675>RecName: Full=RNA-binding protein 25; AltName: Full=RNA-binding m…	K.LGASNS*PGQPNSVK.R	S675*	UNI:B2RY56	1.48745	0.0272191	1.20674e+06	1.20674e+06	879435	1192787	845275	1909475	811284	747773	800284	596878	1100200	479.224	0.0982128	22.86	9.42795	0.580979	3	0		226736666	RecName: Full=RNA-binding protein 25; AltName: Full=RNA-binding motif protein 25	B2RY56	RBM25_MOUSE	15229_1	370803	0.0982128	F	22.86	nucleus	mRNA processing	nucleotide binding	Spliceosome
1958892	Caspase-8	Manual Assigned Name:Caspase-8 SwissPROT>CASP8_MOUSE>S188>Caspase-8 OS=Mus musculus GN=Casp8 IPI>O89110>S188>Caspase-8 IPI>IPI00131533.1>S188>Casp8 Caspase-8 NCBI>25090576>S188>Caspase-8 precursor NCBI>148667683>S188>caspase 8, isoform CRA_a [Mus musculus] [MASS=55357] NCBI>148667682>S188>caspase 8, isoform CRA_a [Mus musculus] NCBI>13879513>S188>caspase 8 [Mus musculus] NCBI>4138211>S188>caspase…	R.RMS*LEGR.E	S188	UNI:O89110	1.48572	0.0264414	4.96697e+06	4.96697e+06	4532145	4665782	5174372	5495587	3.34315e+06	2647084	2755152	3309531	4660839	464.707	0.292975	36.92	100	0.838004	2	0		25090576	Caspase-8 precursor	O89110	CASP8_MOUSE		374092	0.0409303	F	36.92	nucleus	proteolysis	protein binding	Alzheimer's disease Pathways in cancer Huntington's disease RIG-I-like receptor signaling pathway Apoptosis Toll-like receptor signaling pathway p53 signaling pathway NOD-like receptor signaling pathway Viral myocarditis
1959385	Serine/arginine repetitive matrix protein 2	Manual Assigned Name:Serine/arginine repetitive matrix protein 2 SwissPROT>SRRM2_MOUSE>S1305>Isoform 3 of Serine/arginine repetitive matrix protein 2 OS=Mus musculus GN=Srrm2 IPI>Q8BTI8>S1305>Serine/arginine repetitive matrix protein 2 IPI>Q8BTI8-2>S1305>Isoform 2 of Serine/arginine repetitive matrix protein 2 IPI>Q8BTI8-3>S1305>Isoform 3 of Serine/arginine repetitive matrix protein 2 IPI>IPI0022…	K.NSGPVSEVNTGFS*PEVK.E	S1305	UNI:Q8BTI8	1.48158	0.012029	4.53301e+07	4.53301e+07	32820345	61808190	54814070	31877792	3.05957e+07	21696439	42806960	34335129	23544198	914.411	0.646674	56.25	51.9673	0.871775	2	0		341942108	RecName: Full=Serine/arginine repetitive matrix protein 2	Q8BTI8	SRRM2_MOUSE		392144	0.646674	F	56.25	nucleus	mRNA processing	protein binding
1959558	Prelamin-A/C	Manual Assigned Name:Prelamin-A/C SwissPROT>LAMA_MOUSE>S403>Lamin A SwissPROT>LAMC_MOUSE>S403>Lamins C and C2 SwissPROT>LMNA_MOUSE>S291>Isoform C2 of Prelamin-A/C OS=Mus musculus GN=Lmna IPI>P48678>S403>Prelamin-A/C IPI>P48678-2>S403>Isoform C of Prelamin-A/C IPI>P48678-3>S403>Isoform C2 of Prelamin-A/C IPI>IPI00400300.1>S403>Lmna Isoform C of Prelamin-A/C IPI>IPI00620256.3>S403>Lmna Isoform A of…	R.AS*SHSSQSQGGGSVTK.K	S403*	UNI:P48678	1.47861	0.0328695	203602	203602	131289	364885	201768	116466	137698	99680	224470	122438	104205	528.893	0.604544	22.42	7.9588	0.261571	3	0		85700428	Lamin-A/C	P48678	LMNA_MOUSE		375038	0.604544	F	22.42	nucleus	spermatogenesis	protein binding structural molecule activity	Hypertrophic cardiomyopathy (HCM) Arrhythmogenic right ventricular cardiomyopathy (ARVC) Dilated cardiomyopathy
1960141	Prelamin-A/C	Manual Assigned Name:Prelamin-A/C SwissPROT>LAMA_MOUSE>S404>Lamin A SwissPROT>LAMC_MOUSE>S404>Lamins C and C2 SwissPROT>LMNA_MOUSE>S292>Isoform C2 of Prelamin-A/C OS=Mus musculus GN=Lmna IPI>P48678>S404>Prelamin-A/C IPI>P48678-2>S404>Isoform C of Prelamin-A/C IPI>P48678-3>S404>Isoform C2 of Prelamin-A/C IPI>IPI00400300.1>S404>Lmna Isoform C of Prelamin-A/C IPI>IPI00620256.3>S404>Lmna Isoform A of…	R.ASS*HSSQSQGGGSVTK.K	S404*	UNI:P48678	1.47861	0.0328695	203602	203602	131289	364885	201768	116466	137698	99680	224470	122438	104205	528.893	0.436686	27.7	5.27678	0.822024	3	0		85700428	Lamin-A/C	P48678	LMNA_MOUSE		375038	0.436686	F	27.7	nucleus	spermatogenesis	protein binding structural molecule activity	Hypertrophic cardiomyopathy (HCM) Arrhythmogenic right ventricular cardiomyopathy (ARVC) Dilated cardiomyopathy
1958723	Serine/threonine-protein kinase PRP4 homolog	Manual Assigned Name:Serine/threonine-protein kinase PRP4 homolog SwissPROT>B2RUN6_MOUSE>S278>PRP4 pre-mRNA processing factor 4 homolog B (Yeast) OS=Mus musculus GN=Prpf4b SwissPROT>PRP4B_MOUSE>S278>Serine/threonine-protein kinase PRP4 homolog OS=Mus musculus GN=Prpf4b IPI>Q61136>S278>Serine/threonine-protein kinase PRP4 homolog IPI>IPI00320690.1>S278>Prpf4b Serine/threonine-protein kinase PRP4 h…	R.KKS*PIVNER.S	S278*	UNI:Q61136	1.47314	0.0246184	863926	863926	1092096	786302	812129	765176	586453	774549	467845	493922	609498	384.204	0.21554	22.34	100	0.469043	3	0		341942183	RecName: Full=Serine/threonine-protein kinase PRP4 homolog; AltName: Full=PRP4 pre-mRNA-processing factor 4 homolog; AltName: Full=Pre-mRNA protein kinase	Q61136	PRP4B_MOUSE		372307	0.21554	F	22.34	nucleus chromosome	protein amino acid phosphorylation	protein binding
1960275	Sister chromatid cohesion protein PDS5 homolog B	Manual Assigned Name:Sister chromatid cohesion protein PDS5 homolog B SwissPROT>PDS5B_MOUSE>S1358>Isoform 3 of Sister chromatid cohesion protein PDS5 homolog B OS=Mus musculus GN=Pds5b IPI>Q4VA53>S1356>Sister chromatid cohesion protein PDS5 homolog B IPI>Q4VA53-3>S1356>Isoform 3 of Sister chromatid cohesion protein PDS5 homolog B IPI>IPI00317401.6>S1356>Pds5b Isoform 1 of Sister chromatid cohesio…	R.AES*PETSAVESTQSTPQK.G	S1356*	UNI:Q4VA53	1.46631	0.0275759	2.30701e+06	2.30701e+06	1537307	2675272	2287642	2727834	1.57335e+06	1155635	1914472	1760030	1463244	652.953	0.190102	20.01	1.68122	0.81676	3	0		81908799	Sister chromatid cohesion protein PDS5 homolog B (Androgen-induced proliferation inhibitor) (Androgen-induced prostate proliferative shutoff-associated protein AS3)	Q4VA53	PDS5B_MOUSE		371162	0.190102	F	20.01	nucleus	cell cycle	DNA binding
1960138	Vimentin	Manual Assigned Name:Vimentin SwissPROT>VIME_MOUSE>Vimentin OS=Mus musculus GN=Vim IPI>P20152>Vimentin IPI>IPI00227299.6>Vim Vimentin IPI>E9PZV5>Uncharacterized protein NCBI>138536>Vimentin NCBI>148676107>vimentin, isoform CRA_b [Mus musculus] [MASS=53687] NCBI>123858292>vimentin [Mus musculus] NCBI>58476928>Vimentin [Mus musculus] NCBI>2078001>vimentin [Mus musculus] NCBI>202370>vimentin NCBI>55…	R.ISLPLPTFS*SLNLR.E	S419*	UNI:P20152	1.46166	0.0246184	1.09507e+07	1.09507e+07	14196129	12486358	6169640		7.49195e+06	9080799	8947072	4447992		824.441	0.271865	47.15	10.7918	0.907094	2	0		138536	Vimentin	P20152	VIME_MOUSE		374414	0.271865	F	47.15	cytoplasm	intermediate filament-based process	protein binding
1959687	Rab GTPase-binding effector protein 1	Manual Assigned Name:Rab GTPase-binding effector protein 1 SwissPROT>Q5QNU3_MOUSE>S407>"Rabaptin, RAB GTPase binding effector protein 1 OS=Mus musculus GN=Rabep1" SwissPROT>Q5QNU4_MOUSE>S367>"Rabaptin, RAB GTPase binding effector protein 1 OS=Mus musculus GN=Rabep1" SwissPROT>RABE1_MOUSE>S407>Isoform 6 of Rab GTPase-binding effector protein 1 OS=Mus musculus GN=Rabep1 IPI>O35551>S407>Rab GTPase-b…	R.AQS*TDSLGTSSSLQSK.A	S407*	UNI:O35551	1.45893	0.0346121	1.52535e+06	1.52535e+06	952878	1827453	1919801	1401249	1.04552e+06	708276	1370727	1451070	652015	842.879	0.594747	70.81	13.8917	0.908198	2	0		47605961	Rab GTPase binding effector protein 1 (Rabaptin-5) (Rabaptin-5alpha)	O35551	RABE1_MOUSE		381442	0.594747	F	70.81	cytoplasm endosome	transport	protein binding growth factor activity	Endocytosis
1959460	Perilipin-1	Manual Assigned Name:Perilipin-1 HPRD>01364_1>S408>Perilipin SwissPROT>PLIN_MOUSE>S410>Perilipin (PERI) (Lipid droplet-associated protein) IPI>Q8CGN5>S410>Perilipin-1 IPI>IPI00387480.1>S410>Plin Perilipin IPI>IPI00223783.2>S410>Plin1 Isoform 1 of Perilipin-1 NCBI>261260072>S410>RecName: Full=Perilipin-1; AltName: Full=Lipid droplet-associated protein; AltName: Full=Perilipin A NCBI>148675108>S410…	R.LS*LMEPESEFR.D	S410	UNI:Q8CGN5	1.45823	0.0396527	1.97829e+08	1.97829e+08	325624083	289112234	117215440	59364865	1.35664e+08	176601179	215540919	111297552	39214855	717.304	0.977957	38.99	112.577	0.964294	2	0		261260072	RecName: Full=Perilipin-1; AltName: Full=Lipid droplet-associated protein; AltName: Full=Perilipin A	Q8CGN5	PLIN_MOUSE	01364_1	390074	0.131138	F	38.99	lipid particle	lipid metabolic process	protein binding	PPAR signaling pathway
1960461	Perilipin-1	Manual Assigned Name:Perilipin-1 HPRD>01364_1>S408>Perilipin SwissPROT>PLIN_MOUSE>S410>Perilipin (PERI) (Lipid droplet-associated protein) IPI>Q8CGN5>S410>Perilipin-1 IPI>IPI00387480.1>S410>Plin Perilipin IPI>IPI00223783.2>S410>Plin1 Isoform 1 of Perilipin-1 NCBI>261260072>S410>RecName: Full=Perilipin-1; AltName: Full=Lipid droplet-associated protein; AltName: Full=Perilipin A NCBI>148675108>S410…	R.LS*LMEPESEFR.D	S410	UNI:Q8CGN5	1.45823	0.0396527	1.97829e+08	1.97829e+08	325624083	289112234	117215440	59364865	1.35664e+08	176601179	215540919	111297552	39214855	714.312	1.21041	27.96	77.6804	0.923344	2	0		261260072	RecName: Full=Perilipin-1; AltName: Full=Lipid droplet-associated protein; AltName: Full=Perilipin A	Q8CGN5	PLIN_MOUSE	01364_1	390074	1.21041	F	27.96	lipid particle	lipid metabolic process	protein binding	PPAR signaling pathway
1958975	Kif13b kinesin family member 13B	Manual Assigned Name:Kif13b kinesin family member 13B SwissPROT>Q6A029_MOUSE>MKIAA0639 protein (Fragment) OS=Mus musculus GN=Kif13b IPI>IPI00761751.2>Kif13b kinesin family member 13B IPI>E9Q4K7>Uncharacterized protein NCBI>148704095>mCG2476 [Mus musculus] [MASS=212836] NCBI>124487163>kinesin family member 13B [Mus musculus] [MASS=204574] NCBI>50510563>mKIAA0639 protein [Mus musculus] [MASS=87633]	R.RRS*S*GLQPQGAPEVR.R	S1794S1795	UNI:IPI00761751.2	1.45657	0.0305361	3.35774e+06	3.35774e+06	2782497	3435180	4696729	2516551	2.30524e+06	1547213	2301252	3159825	2212679	599.943	0.0739787	41.63	100	0.67261	3	0		148704095	mCG2476 [Mus musculus] [MASS=212836]	IPI00761751.2	Q6A029_MOUSE		377998	0.0739787	F	41.63	cytoplasm	steroid metabolic process	protein binding
1958921	Kif13b kinesin family member 13B	Manual Assigned Name:Kif13b kinesin family member 13B SwissPROT>Q6A029_MOUSE>MKIAA0639 protein (Fragment) OS=Mus musculus GN=Kif13b IPI>IPI00761751.2>Kif13b kinesin family member 13B IPI>E9Q4K7>Uncharacterized protein NCBI>148704095>mCG2476 [Mus musculus] [MASS=212836] NCBI>124487163>kinesin family member 13B [Mus musculus] [MASS=204574] NCBI>50510563>mKIAA0639 protein [Mus musculus] [MASS=87633]	R.SIS*SPSMNR.L	S1380	UNI:IPI00761751.2	1.45531	0.0447694	6.98243e+06	6.98243e+06	3918559	11920359	10101661	1989143	4.7979e+06	3273231	7446383	6519921	1952063	534.724	0.628954	40.43	33.8039	0.877855	2	0		148704095	mCG2476 [Mus musculus] [MASS=212836]	IPI00761751.2	Q6A029_MOUSE		377998	0.166598	F	40.43	cytoplasm microtubule	steroid metabolic process microtubule-based movement	protein binding ATP binding
1959466	Rab-3A-interacting protein	Manual Assigned Name:Rab-3A-interacting protein SwissPROT>RAB3I_MOUSE>S240>Rab-3A-interacting protein OS=Mus musculus GN=Rab3ip IPI>Q68EF0>S240>Rab-3A-interacting protein IPI>IPI00461479.1>S240>Rab3ip Rab-3A-interacting protein NCBI>71152026>S240>RAB3A-interacting protein (Rabin-3) (SSX2-interacting protein) NCBI>51327198>S240>RAB3A interacting protein [Mus musculus] [MASS=47133] NCBI>148689864>S…	K.S*TSSAMGGSHQDLSVIQPIVK.D	S240	UNI:Q68EF0	1.45379	0.012029	4.57852e+07	4.57852e+07	38108284	58349104	62263214	24420319	3.14937e+07	28302576	39099683	40609489	17962969	744.027	0.457834	39.03	9.34047	0.438132	3	0		71152026	RAB3A-interacting protein (Rabin-3) (SSX2-interacting protein)	Q68EF0	RAB3I_MOUSE		371750	0.457834	F	39.03	nucleus	transport	protein binding
1960173	DNA-(apurinic or apyrimidinic site) lyase	Manual Assigned Name:DNA-(apurinic or apyrimidinic site) lyase SwissPROT>APEX1_MOUSE>S18>DNA-(apurinic or apyrimidinic site) lyase OS=Mus musculus GN=Apex1 SwissPROT>D3Z124_MOUSE>S18>Uncharacterized protein OS=Mus musculus GN=Apex1 SwissPROT>D3Z6R9_MOUSE>S18>Uncharacterized protein OS=Mus musculus GN=Apex1 IPI>P28352>S18>DNA-(apurinic or apyrimidinic site) lyase IPI>IPI00224152.5>S18>Apex1 DNA-(a…	K.AAADDGEEPKS*EPETK.K	S18	UNI:P28352	1.44967	0.04944	675030	675030	817430	489460	993906	399324	465645	586636	377769	506350	391827	585.244	0.34099	23.53	11.593	0.590636	3	0		113985	DNA-(apurinic or apyrimidinic site) lyase (AP endonuclease 1) (APEX nuclease) (APEN)	P28352	D3Z6R9_MOUSE		378986	0.34099	F	23.53	nucleus	DNA repair	protein binding	Base excision repair
1959502	Pleckstrin homology domain-containing family O member 2	Manual Assigned Name:Pleckstrin homology domain-containing family O member 2 SwissPROT>PKHO2_MOUSE>S394>Pleckstrin homology domain-containing family O member 2 OS=Mus musculus GN=Plekho2 IPI>Q8K124>S394>Pleckstrin homology domain-containing family O member 2 IPI>IPI00403031.5>S394>Plekho2 Pleckstrin homology domain-containing family O member 2 NCBI>81900897>S394>Pleckstrin homology domain-contain…	R.SS*SLGDLLR.E	S394	UNI:Q8K124	1.44693	0.0396527	6.65942e+06	6.65942e+06	6617776	9570281	3759914	6689726	4.60245e+06	4822815	4972557	2275563	6338847	514.245	0.0369836	63.55		0.928439	2	0		81900897	Pleckstrin homology domain-containing family O member 2 (Pleckstrin homology domain-containing family Q member 1)	Q8K124	PKHO2_MOUSE		384160	0.0369836	F	63.55
1959503	Pleckstrin homology domain-containing family O member 2	Manual Assigned Name:Pleckstrin homology domain-containing family O member 2 SwissPROT>PKHO2_MOUSE>S395>Pleckstrin homology domain-containing family O member 2 OS=Mus musculus GN=Plekho2 IPI>Q8K124>S395>Pleckstrin homology domain-containing family O member 2 IPI>IPI00403031.5>S395>Plekho2 Pleckstrin homology domain-containing family O member 2 NCBI>81900897>S395>Pleckstrin homology domain-contain…	R.SSS*LGDLLR.E	S395	UNI:Q8K124	1.44693	0.0396527	6.65942e+06	6.65942e+06	6617776	9570281	3759914	6689726	4.60245e+06	4822815	4972557	2275563	6338847	519.25	1.70411	63.53	39.9127	0.95975	2	0		81900897	Pleckstrin homology domain-containing family O member 2 (Pleckstrin homology domain-containing family Q member 1)	Q8K124	PKHO2_MOUSE		384160	0.643861	F	63.53
1959635	Rho guanine nucleotide exchange factor 2	Manual Assigned Name:Rho guanine nucleotide exchange factor 2 HPRD>10458_1>S955S959>Rho guanine nucleotide exchange factor 2 HPRD>10458_2>S928S932>Rho guanine nucleotide exchange factor 2 SwissPROT>ARHG2_MOUSE>S926S930>Isoform 5 of Rho guanine nucleotide exchange factor 2 OS=Mus musculus GN=Arhgef2 IPI>Q60875>S955S959>Rho guanine nucleotide exchange factor 2 IPI>Q60875-4>S955S959>Isoform 4 of Rho…	R.LS*PPHS*PR.D	S955S959	UNI:Q60875	1.44451	0.0116502	1.76314e+06	1.76314e+06	1275213	2317367	2440789	1019188	1.22058e+06	868940	1512114	1834204	667051	525.712	0.230385	22.73	100	0.811612	2	0		341940631	RecName: Full=Rho guanine nucleotide exchange factor 2; AltName: Full=Guanine nucleotide exchange factor H1; Short=GEF-H1; AltName: Full=LBC'S first cousin; AltName: Full=Lymphoid blast crisis-like 1; AltName: Full=Oncogene LFC; AltName: Full=Rhobin	Q60875	ARHG2_MOUSE	10458_2	375035	0.230385	F	22.73	cytoplasm intracellular	cell cycle apoptosis intracellular signaling cascade	protein binding zinc ion binding	Pathogenic Escherichia coli infection
1959340	WASH complex subunit FAM21	Manual Assigned Name:WASH complex subunit FAM21 SwissPROT>FAM21_MOUSE>Isoform 2 of WASH complex subunit FAM21 OS=Mus musculus GN=Fam21 IPI>Q6PGL7>WASH complex subunit FAM21 IPI>Q6PGL7-2>Isoform 2 of WASH complex subunit FAM21 IPI>IPI00468516.3>D6Wsu116e Isoform 1 of WASH complex subunit FAM21 IPI>IPI00886310.1>D6Wsu116e Isoform 2 of WASH complex subunit FAM21 IPI>E9PY74>Uncharacterized protein NC…	R.VS*PEVGSADVASIAQK.E	S747	UNI:Q6PGL7	1.43736	0.0230352	5.53108e+06	5.53108e+06	4860034	7653899	6979727	2630654	3.84808e+06	3257863	5493718	4489122	2151616	819.394	1.89769	80.7	67.6213	0.934881	2	0		81885787	Protein FAM21	Q6PGL7	FAM21_MOUSE		378088	1.0734	F	80.7
1960319	Guanine nucleotide-binding protein-like 3	Manual Assigned Name:Guanine nucleotide-binding protein-like 3 SwissPROT>GNL3_MOUSE>S472>Isoform 2 of Guanine nucleotide-binding protein-like 3 OS=Mus musculus GN=Gnl3 IPI>Q8CI11>S505>Guanine nucleotide-binding protein-like 3 IPI>Q8CI11-2>S505>Isoform 2 of Guanine nucleotide-binding protein-like 3 IPI>IPI00222461.4>S505>Gnl3 Isoform 1 of Guanine nucleotide-binding protein-like 3 IPI>IPI00399477.1…	R.ELS*PEQSTAGKPSDGSSALDR.A	S505	UNI:Q8CI11	1.43336	0.0415967	4.27749e+06	4.27749e+06	4363943	4705594	3262034	4778397	2.98423e+06	2586055	2880033	1642960	4827877	737.996	1.09043	23.68	23.3117	0.664561	3	0		62510642	Guanine nucleotide binding protein-like 3 (Nucleolar GTP-binding protein 3) (Nucleostemin)	Q8CI11	GNL3_MOUSE		380083	1.09043	F	23.68	nucleus	regulation of cell proliferation	protein binding
1960007	Protein phosphatase 1 regulatory subunit 12A	Manual Assigned Name:Protein phosphatase 1 regulatory subunit 12A SwissPROT>MYPT1_MOUSE>S909>Isoform 2 of Protein phosphatase 1 regulatory subunit 12A OS=Mus musculus GN=Ppp1r12a IPI>Q9DBR7>S909>Protein phosphatase 1 regulatory subunit 12A IPI>Q9DBR7-2>S909>Isoform 2 of Protein phosphatase 1 regulatory subunit 12A IPI>IPI00671847.3>S909>Ppp1r12a Isoform 1 of Protein phosphatase 1 regulatory subun…	R.SAS*YSYLEDR.K	S909*	UNI:Q9DBR7	1.43145	0.042014	3.56401e+06	3.56401e+06	1730077	3832924	3819066	4873969	2.48979e+06	651098	2690486	2715295	3902269	635.753	0.190476	45.53	13.8917	0.954175	2	0		281185473	RecName: Full=Protein phosphatase 1 regulatory subunit 12A; AltName: Full=Myosin phosphatase-targeting subunit 1; Short=Myosin phosphatase target subunit 1	Q9DBR7	MYPT1_MOUSE		385473	0.190476	F	45.53	cytoplasm intracellular membrane-bounded organelle	protein amino acid dephosphorylation	protein binding	Regulation of actin cytoskeleton Vascular smooth muscle contraction Focal adhesion Long-term potentiation
1959724	Ubiquitin-conjugating enzyme E2 J1	Manual Assigned Name:Ubiquitin-conjugating enzyme E2 J1 SwissPROT>A3KG52_MOUSE>S209>Ubiquitin-conjugating enzyme E2 J1 (Fragment) OS=Mus musculus GN=Ube2j1 SwissPROT>UB2J1_MOUSE>S266>Ubiquitin-conjugating enzyme E2 J1 OS=Mus musculus GN=Ube2j1 IPI>Q9JJZ4>S266>Ubiquitin-conjugating enzyme E2 J1 IPI>IPI00321895.1>S266>Ube2j1 Ubiquitin-conjugating enzyme E2 J1 IPI>IPI00648249.2>S266>Ube2j1 Ubiquitin…	R.RPS*TSPDVLQGQPPR.A	S266	UNI:Q9JJZ4	1.42604	0.0241703	1.24124e+07	1.24124e+07	10868342	11308038	9098850	18374175	8.70406e+06	6514474	8802469	5971727	13527556	578.953	0.293398	24.93		0.809566	3	0		52000879	Ubiquitin-conjugating enzyme E2 J1 (Non-canonical ubiquitin conjugating enzyme 1) (NCUBE1)	Q9JJZ4	UB2J1_MOUSE		375146	0.0247861	F	24.93	integral to membrane	modification-dependent protein catabolic process regulation of protein metabolic process	ATP binding small conjugating protein ligase activity	Parkinson's disease Ubiquitin mediated proteolysis
1959116	mRNA cap guanine-N7 methyltransferase	Manual Assigned Name:mRNA cap guanine-N7 methyltransferase SwissPROT>D3YYS7_MOUSE>S100>Uncharacterized protein OS=Mus musculus GN=Rnmt SwissPROT>D3Z478_MOUSE>S100>Uncharacterized protein OS=Mus musculus GN=Rnmt SwissPROT>D3Z4K1_MOUSE>S100>Uncharacterized protein OS=Mus musculus GN=Rnmt SwissPROT>MCES_MOUSE>S100>Isoform 3 of mRNA cap guanine-N7 methyltransferase OS=Mus musculus GN=Rnmt IPI>Q9D0L8>…	R.GDVS*EDEPSLGR.L	S100	UNI:Q9D0L8	1.42281	0.0487112	3.33748e+06	3.33748e+06	3018629	4731177	3805655	1794462	2.3457e+06	1939420	2904909	2612241	1926231	670.772	0.568429	31.04	44.3857	0.868708	2	0		81881162	mRNA cap guanine-N7 methyltransferase (mRNA (guanine-N(7)-)-methyltransferase) (RG7MT1) (mRNA cap methyltransferase)	Q9D0L8	MCES_MOUSE		370726	0.202904	F	31.04	nucleus	mRNA processing	transferase activity
1958935	MCG14935, isoform CRA_a	Manual Assigned Name:MCG14935, isoform CRA_a SwissPROT>Q3UWE6_MOUSE>"MCG14935, isoform CRA_a OS=Mus musculus GN=Wdr20a" SwissPROT>Q8R0J5_MOUSE>Wdr20a protein OS=Mus musculus GN=Wdr20a SwissPROT>WDR20_MOUSE>WD repeat-containing protein 20 OS=Mus musculus GN=Wdr20 IPI>Q3UWE6>MCG14935, isoform CRA_a IPI>Q9D5R2>WD repeat-containing protein 20 IPI>IPI00108307.1>Wdr20b WD repeat-containing protein 20 I…	R.SNS*LPHSAVSNAASK.G	S434	UNI:Q3UWE6	1.42201	0.0323339	1.22167e+06	1.22167e+06	1212862	1546953	911284	1215579	859115	637117	1230007	722108	847230	517.238	1.137	33.45	45.1572	0.719733	3	0		28380207	WD-repeat protein 20	Q3UWE6	Q3UWE6_MOUSE		377503	0.754339	F	33.45
1959499	Glucosamine--fructose-6-phosphate aminotransferase [isomerizing] 1	Manual Assigned Name:Glucosamine--fructose-6-phosphate aminotransferase [isomerizing] 1 HPRD>00702_1>S243>GFAT SwissPROT>GFPT1_MOUSE>S243>Isoform 2 of Glucosamine--fructose-6-phosphate aminotransferase [isomerizing] 1 OS=Mus musculus GN=Gfpt1 IPI>P47856>S259>Glucosamine--fructose-6-phosphate aminotransferase [isomerizing] 1 IPI>P47856-2>S259>Isoform 2 of Glucosamine--fructose-6-phosphate aminotra…	R.VDS*TTCLFPVEEK.A	S259*	UNI:P47856	1.41965	0.0396527	3.66146e+07	3.66146e+07	52848386	42800075	28523347	22286462	2.57913e+07	32284901	29285549	19542902	22051967	806.856	0.658521	40.38	22.4677	0.884341	2	0		30923239	Glucosamine--fructose-6-phosphate aminotransferase [isomerizing] 1 (Hexosephosphate aminotransferase 1) (D-fructose-6-phosphate amidotransferase 1) (GFAT 1) (GFAT1) [MASS=78539]	P47856	GFPT1_MOUSE	00702_1	375935	0.658521	F	40.38	cytoplasm	metabolic process	transferase activity	Amino sugar and nucleotide sugar metabolism Alanine, aspartate and glutamate metabolism
1959618	Nardilysin	Manual Assigned Name:Nardilysin HPRD>04036_1>S86>Nardilysin SwissPROT>A2A9Q2_MOUSE>S85>"Nardilysin, N-arginine dibasic convertase, NRD convertase 1 OS=Mus musculus GN=Nrd1" SwissPROT>A6PWC3_MOUSE>S85>"Nardilysin, N-arginine dibasic convertase, NRD convertase 1 OS=Mus musculus GN=Nrd1" SwissPROT>NRDC_MOUSE>S85>Nardilysin OS=Mus musculus GN=Nrd1 IPI>Q8BHG1>S85>Nardilysin IPI>A2A9Q2>S85>Nardilysin, …	R.LGADES*EEEGR.S	S85	UNI:Q8BHG1	1.41913	0.0346121	627630	627630	639321	813355	783172	274672	442264	394240	468415	684018	222383	636.243	0.37594	38.17	100	0.914347	2	0		29839513	Nardilysin precursor (N-arginine dibasic convertase) (NRD convertase) (NRD-C)	Q8BHG1	NRDC_MOUSE	04036_1	385255	0.103816	F	38.17	cytosol integral to membrane mitochondrion intracellular nucleus	proteolysis	protein binding zinc ion binding
1959363	Sipa1l1 protein	Manual Assigned Name:Sipa1l1 protein HPRD>11559_1>S1549>E6 targeted protein 1 SwissPROT>SI1L1_MOUSE>S1528>Isoform 2 of Signal-induced proliferation-associated 1-like protein 1 OS=Mus musculus GN=Sipa1l1 IPI>Q4VBF8>S1528>Sipa1l1 protein IPI>Q8C0T5>S1528>Signal-induced proliferation-associated 1-like protein 1 IPI>Q8C0T5-2>S1528>Isoform 2 of Signal-induced proliferation-associated 1-like protein 1 …	K.LIDLES*PTPESQK.N	S1528*	UNI:Q4VBF8	1.40864	0.0230352	6.33393e+06	6.33393e+06	5533872	8764307	6285552	4751971	4.49648e+06	3476138	6231839	5095319	3182643	768.864	1.52793	49.58	26.0224	0.957325	2	0		50401562	Signal-induced proliferation-associated 1 like protein 1 [MASS=197030]	Q4VBF8	SI1L1_MOUSE	11559_1	383532	0.222552	F	49.58	intracellular	regulation of small GTPase mediated signal transduction biological_process	protein binding
1959262	Heterogeneous nuclear ribonucleoprotein L-like	Manual Assigned Name:Heterogeneous nuclear ribonucleoprotein L-like SwissPROT>Q3UXJ3_MOUSE>S129>Putative uncharacterized protein (Fragment) OS=Mus musculus IPI>Q921F4>S37>Heterogeneous nuclear ribonucleoprotein L-like IPI>Q921F4-4>S37>Isoform 2 of Heterogeneous nuclear ribonucleoprotein L-like IPI>IPI00121760.5>S37>Hnrpll Isoform 1 of Heterogeneous nuclear ribonucleoprotein L-like IPI>IPI00555009…	R.LKTEEGEIVYS*AEESENR.Q	S37	UNI:Q921F4	1.40385	0.0333459	8.33289e+06	8.33289e+06	5024071	9280967	6060459	12966052	5.93572e+06	2873470	6193409	3095202	11580815	727.663	1.04953	47.29	22.4115	0.906708	3	0		62286942	Heterogeneous nuclear ribonucleoprotein L-like [MASS=64124]	Q921F4	Q3UXJ3_MOUSE		382867	1.04953	F	47.29	nucleus	mRNA processing	protein binding
1960359	Bin1 protein	Manual Assigned Name:Bin1 protein SwissPROT>BIN1_MOUSE>S265>Isoform 2 of Myc box-dependent-interacting protein 1 OS=Mus musculus GN=Bin1 SwissPROT>Q6P1B9_MOUSE>S265>Bin1 protein OS=Mus musculus GN=Bin1 IPI>Q6P1B9>S265>Bin1 protein IPI>O08539>S265>Myc box-dependent-interacting protein 1 IPI>O08539-2>S265>Isoform 2 of Myc box-dependent-interacting protein 1 IPI>IPI00114352.1>S265>Bin1 Isoform 1 of …	K.S*PSPPPDGSPAATPEIR.V	S265*	UNI:Q6P1B9	1.39807	0.010407	6.54338e+06	6.54338e+06	6861955	6683398	7031903	5596260	4.6803e+06	4741229	4978707	5210061	3791223	878.401	0.308692	49.33	8.23909	0.788576	2	0		14916536	Myc box dependent interacting protein 1 (Bridging integrator 1) (Amphiphysin-like protein) (Amphiphysin II) (SH3-domain containing protein 9)	Q6P1B9	Q6P1B9_MOUSE		373396	0.308692	F	49.33	nucleus cytoplasm	multicellular organismal development regulation of endocytosis	protein binding
1959108	Bin1 protein	Manual Assigned Name:Bin1 protein SwissPROT>BIN1_MOUSE>S265S267>Isoform 2 of Myc box-dependent-interacting protein 1 OS=Mus musculus GN=Bin1 SwissPROT>Q6P1B9_MOUSE>S265S267>Bin1 protein OS=Mus musculus GN=Bin1 IPI>Q6P1B9>S265S267>Bin1 protein IPI>O08539>S265S267>Myc box-dependent-interacting protein 1 IPI>O08539-2>S265S267>Isoform 2 of Myc box-dependent-interacting protein 1 IPI>IPI00114352.1>S26…	K.GNKS*PS*PPPDGSPAATPEIR.V	S265S267*	UNI:Q6P1B9	1.39184	0.0385491	3.96327e+06	3.96327e+06	2854996	5472670	4490232	3035168	2.8475e+06	2479909	3063132	3351425	2495536	712.311	0.947109	23.81	21.4053	0.372981	3	0		14916536	Myc box dependent interacting protein 1 (Bridging integrator 1) (Amphiphysin-like protein) (Amphiphysin II) (SH3-domain containing protein 9)	Q6P1B9	Q6P1B9_MOUSE		373396	0.947109	F	23.81	nucleus cytoplasm	multicellular organismal development regulation of endocytosis	protein binding
1959061	Dclk1 protein	Manual Assigned Name:Dclk1 protein HPRD>09202_1>S307>Doublecortin and CaM kinase like 1 SwissPROT>DCAK1_MOUSE>S307>Serine/threonine-protein kinase DCAMKL1 (EC 2.7.1.37) (Doublecortin-like and CAM kinase-like 1) SwissPROT>DCLK1_MOUSE>S307>Isoform 2 of Serine/threonine-protein kinase DCLK1 OS=Mus musculus GN=Dclk1 SwissPROT>Q8BRN4_MOUSE>S307>Putative uncharacterized protein OS=Mus musculus GN=Dclk1…	R.SKS*PASTSSVNGTPGSQLSTPR.S	S307	UNI:Q80VB6	1.38782	0.0396527	3.02877e+06	3.02877e+06	2044698	3576035	3155167	3339163	2.18239e+06	1224319	2129427	2033362	3342443	748.692	0.753545	46.21	15.1415	0.7995	3	0		20137987	Serine/threonine-protein kinase DCAMKL1 (Doublecortin-like and CAM kinase-like 1)	Q80VB6	Q9JLM7_MOUSE	09202_1	380814	0.753545	F	46.21	integral to plasma membrane nucleus intracellular	protein amino acid phosphorylation intracellular signaling cascade	protein binding ATP binding kinase activity transferase activity
1959694	Dclk1 protein	Manual Assigned Name:Dclk1 protein HPRD>09202_1>S312>Doublecortin and CaM kinase like 1 SwissPROT>DCAK1_MOUSE>S312>Serine/threonine-protein kinase DCAMKL1 (EC 2.7.1.37) (Doublecortin-like and CAM kinase-like 1) SwissPROT>DCLK1_MOUSE>S312>Isoform 2 of Serine/threonine-protein kinase DCLK1 OS=Mus musculus GN=Dclk1 SwissPROT>Q8BRN4_MOUSE>S312>Putative uncharacterized protein OS=Mus musculus GN=Dclk1…	R.SKSPASTS*SVNGTPGSQLSTPR.S	S312	UNI:Q80VB6	1.38782	0.0396527	3.02877e+06	3.02877e+06	2044698	3576035	3155167	3339163	2.18239e+06	1224319	2129427	2033362	3342443	742.684	0.450576	46.01	2.91887	0.438932	3	0		20137987	Serine/threonine-protein kinase DCAMKL1 (Doublecortin-like and CAM kinase-like 1)	Q80VB6	Q9JLM7_MOUSE	09202_1	380814	0.450576	F	46.01	integral to plasma membrane nucleus intracellular	protein amino acid phosphorylation intracellular signaling cascade	protein binding ATP binding kinase activity transferase activity
1959951	Dclk1 protein	Manual Assigned Name:Dclk1 protein HPRD>09202_1>S310>Doublecortin and CaM kinase like 1 SwissPROT>DCAK1_MOUSE>S310>Serine/threonine-protein kinase DCAMKL1 (EC 2.7.1.37) (Doublecortin-like and CAM kinase-like 1) SwissPROT>DCLK1_MOUSE>S310>Isoform 2 of Serine/threonine-protein kinase DCLK1 OS=Mus musculus GN=Dclk1 SwissPROT>Q8BRN4_MOUSE>S310>Putative uncharacterized protein OS=Mus musculus GN=Dclk1…	R.SKSPAS*TSSVNGTPGSQLSTPR.S	S310	UNI:Q80VB6	1.38782	0.0396527	3.02877e+06	3.02877e+06	2044698	3576035	3155167	3339163	2.18239e+06	1224319	2129427	2033362	3342443	742.685	0.202602	32.23	0.0518051	0.6333	3	0		20137987	Serine/threonine-protein kinase DCAMKL1 (Doublecortin-like and CAM kinase-like 1)	Q80VB6	Q9JLM7_MOUSE	09202_1	380814	0.202602	F	32.23	integral to plasma membrane nucleus intracellular	protein amino acid phosphorylation intracellular signaling cascade	protein binding ATP binding kinase activity transferase activity
1959968	RNA-binding protein Raly	Manual Assigned Name:RNA-binding protein Raly SwissPROT>A2AU62_MOUSE>T268>HnRNP-associated with lethal yellow (Fragment) OS=Mus musculus GN=C130057N11Rik SwissPROT>A2AU63_MOUSE>T268>HnRNP-associated with lethal yellow OS=Mus musculus GN=C130057N11Rik SwissPROT>RALY_MOUSE>T252>Isoform 1 of RNA-binding protein Raly OS=Mus musculus GN=Raly IPI>Q64012>T268>RNA-binding protein Raly IPI>Q3U3F6>T268>HnR…	R.LPAPQEDT*ASEAGTPQGEVQTR.D	T268	UNI:Q64012	1.38659	0.0406255	6.50768e+06	6.50768e+06	6591485	6927948	9534904	2976377	4.69331e+06	4422137	4623395	6714155	3013537	788.023	0.339535	30.68	10.9255	0.848568	3	0		341942168	RecName: Full=RNA-binding protein Raly; AltName: Full=Maternally-expressed hnRNP C-related protein; AltName: Full=hnRNP associated with lethal yellow protein	Q64012	RALY_MOUSE		374809	0.339535	F	30.68	nucleus	mRNA processing	nucleotide binding
1960347	RNA-binding protein Raly	Manual Assigned Name:RNA-binding protein Raly SwissPROT>A2AU62_MOUSE>S270>HnRNP-associated with lethal yellow (Fragment) OS=Mus musculus GN=C130057N11Rik SwissPROT>A2AU63_MOUSE>S270>HnRNP-associated with lethal yellow OS=Mus musculus GN=C130057N11Rik SwissPROT>RALY_MOUSE>S254>Isoform 1 of RNA-binding protein Raly OS=Mus musculus GN=Raly IPI>Q64012>S270>RNA-binding protein Raly IPI>Q3U3F6>S270>HnR…	R.LPAPQEDTAS*EAGTPQGEVQTR.D	S270	UNI:Q64012	1.38659	0.0406255	6.50768e+06	6.50768e+06	6591485	6927948	9534904	2976377	4.69331e+06	4422137	4623395	6714155	3013537	788.024	0.667638	27.81	7.87106	0.565062	3	0		341942168	RecName: Full=RNA-binding protein Raly; AltName: Full=Maternally-expressed hnRNP C-related protein; AltName: Full=hnRNP associated with lethal yellow protein	Q64012	RALY_MOUSE		374809	0.667638	F	27.81	nucleus	mRNA processing	nucleotide binding
1960376	SAFB-like transcription modulator	Manual Assigned Name:SAFB-like transcription modulator SwissPROT>SLTM_MOUSE>S534>Isoform 2 of SAFB-like transcription modulator OS=Mus musculus GN=Sltm IPI>Q8CH25>S552>SAFB-like transcription modulator IPI>Q8CH25-2>S552>Isoform 2 of SAFB-like transcription modulator IPI>IPI00229571.1>S552>Sltm Isoform 1 of SAFB-like transcription modulator IPI>IPI00556695.1>S552>Sltm Isoform 2 of SAFB-like transc…	K.S*PGHMVILNQTK.G	S552*	UNI:Q8CH25	1.38351	0.0328695	4.88475e+06	4.88475e+06	4240630	6519561	6137927	2640882	3.53069e+06	2675082	4602617	4388082	2456988	702.839	0.464166	33.3	92.7163	0.916569	2	0		81914411	SAFB-like transcription modulator (SAF-like transcription modulator) (Modulator of estrogen-induced transcription)	Q8CH25	SLTM_MOUSE		380593	0.464166	F	33.3	nucleus	regulation of transcription	nucleotide binding
1959995	Calmodulin-regulated spectrin-associated protein 2	Manual Assigned Name:Calmodulin-regulated spectrin-associated protein 2 SwissPROT>B2RRE3_MOUSE>S1131>Camsap1l1 protein OS=Mus musculus GN=Camsap1l1 SwissPROT>CAMP2_MOUSE>S1120>Isoform 2 of Calmodulin-regulated spectrin-associated protein 2 OS=Mus musculus GN=Camsap1l1 IPI>Q8C1B1>S1120>Calmodulin-regulated spectrin-associated protein 2 IPI>Q8C1B1-2>S1120>Isoform 2 of Calmodulin-regulated spectrin-…	K.ADVSVEKLDGES*DKEQFDDDQK.V	S1120	UNI:Q8C1B1	1.38109	0.0249136	637749	637749	226891	436965	160793	1726346	461771	170558	274841	135063	1266621	867.714	0.508625	34.04	11.7416	0.607849	3	0		166991454	Calmodulin-regulated spectrin-associated protein 1-like protein 1 [MASS=164331]	Q8C1B1	CAMP2_MOUSE		378837	0.508625	F	34.04	microtubule	epidermal growth factor receptor signaling pathway	protein binding
1959160	Vigilin	Manual Assigned Name:Vigilin SwissPROT>Q8BX68_MOUSE>Putative uncharacterized protein OS=Mus musculus GN=Hdlbp SwissPROT>VIGLN_MOUSE>Vigilin OS=Mus musculus GN=Hdlbp IPI>Q8VDJ3>Vigilin IPI>IPI00123379.1>Hdlbp Vigilin IPI>IPI00405603.1>Hdlbp Putative uncharacterized protein NCBI>46396970>Vigilin (High density lipoprotein-binding protein) (HDL-binding protein) [MASS=141742] NCBI>148708010>high densi…	K.VATLNS*EEENDPPTYK.D	S31*	UNI:Q8VDJ3	1.38029	0.0438658	2.60129e+06	2.60129e+06	2291168	3314258	2916419	1883328	1.8846e+06	1419876	2657868	1636819	1823818	943.907	0.428237	56.45	39.3892	0.924856	2	0		46396970	Vigilin (High density lipoprotein-binding protein) (HDL-binding protein) [MASS=141742]	Q8VDJ3	VIGLN_MOUSE		385689	0.104939	F	56.45	nucleus cytosol	transport fructose 2,6-bisphosphate metabolic process	protein binding
1959668	Zinc finger Ran-binding domain-containing protein 2	Manual Assigned Name:Zinc finger Ran-binding domain-containing protein 2 HPRD>09185_1>Zinc finger protein 265 HPRD>09185_2>Zinc finger protein 265 SwissPROT>D3Z4T7_MOUSE>Uncharacterized protein OS=Mus musculus GN=Zranb2 SwissPROT>D3Z4T9_MOUSE>Uncharacterized protein OS=Mus musculus GN=Zranb2 SwissPROT>D3Z4U0_MOUSE>Uncharacterized protein OS=Mus musculus GN=Zranb2 SwissPROT>ZN265_MOUSE>Zinc finger…	K.YNLDAS*EEEDSNKK.K	S188*	UNI:Q9R020	1.37574	0.030902	553392	553392	458756	734030	775933	244848	402249	262600	581619	562490	202286	861.348	0.361273	31.17	33.6165	0.844671	2	0		146291107	Zinc finger Ran-binding domain-containing protein 2 (Zinc finger protein 265) (Zinc finger, splicing)	Q9R020	ZRAB2_MOUSE	9185	392976	0.361273	F	31.17	nucleus	mRNA processing	zinc ion binding protein binding
1959294	Ahnak AHNAK nucleoprotein isoform 1	Manual Assigned Name:Ahnak AHNAK nucleoprotein isoform 1 SwissPROT>Q8BRB8_MOUSE>Putative uncharacterized protein (Fragment) OS=Mus musculus GN=Ahnak IPI>IPI00553798.2>Ahnak AHNAK nucleoprotein isoform 1 IPI>E9Q616>Uncharacterized protein NCBI>61743961>AHNAK nucleoprotein isoform 1 [Mus musculus] [MASS=604249] NCBI>74141032>unnamed protein product [Mus musculus] [MASS=12936] NCBI>26337133>unnamed …	R.LPSGS*GPAS*PTTGSAVDIR.A	S213S217	UNI:IPI00553798.2	1.37563	0.0396527	4.32422e+07	4.32422e+07	30879209	51789994	53406184	36893403	3.14344e+07	21532871	32378959	34927315	36898575	970.425	0.0371164	84.07	27.6042	0.660189	2	0		61743961	AHNAK nucleoprotein isoform 1 [Mus musculus] [MASS=604249]	IPI00553798.2	Q8BRB8_MOUSE			0.0371164	F	84.07	mitochondrion	protein amino acid phosphorylation	protein binding
1960017	Ahnak AHNAK nucleoprotein isoform 1	Manual Assigned Name:Ahnak AHNAK nucleoprotein isoform 1 SwissPROT>Q8BRB8_MOUSE>Putative uncharacterized protein (Fragment) OS=Mus musculus GN=Ahnak IPI>IPI00553798.2>Ahnak AHNAK nucleoprotein isoform 1 IPI>E9Q616>Uncharacterized protein NCBI>61743961>AHNAK nucleoprotein isoform 1 [Mus musculus] [MASS=604249] NCBI>74141032>unnamed protein product [Mus musculus] [MASS=12936] NCBI>26337133>unnamed …	R.LPS*GSGPAS*PTTGSAVDIR.A	S211S217	UNI:IPI00553798.2	1.37563	0.0396527	4.32422e+07	4.32422e+07	30879209	51789994	53406184	36893403	3.14344e+07	21532871	32378959	34927315	36898575	965.42	1.38458	41.75	8.93044	0.291058	2	0		61743961	AHNAK nucleoprotein isoform 1 [Mus musculus] [MASS=604249]	IPI00553798.2	Q8BRB8_MOUSE			1.38458	F	41.75	mitochondrion	protein amino acid phosphorylation	protein binding
1959740	Ubiquinone biosynthesis protein COQ9, mitochondrial	Manual Assigned Name:Ubiquinone biosynthesis protein COQ9, mitochondrial SwissPROT>COQ9_MOUSE>S81>"Ubiquinone biosynthesis protein COQ9, mitochondrial OS=Mus musculus GN=Coq9" IPI>Q8K1Z0>S81>Ubiquinone biosynthesis protein COQ9, mitochondrial IPI>IPI00169862.1>S81>Coq9 Ubiquinone biosynthesis protein COQ9, mitochondrial IPI>IPI00885646.1>S81>Coq9 Protein IPI>F6SFF5>S81>Uncharacterized protein (Fr…	R.YTDQS*GEEEEDYESEEQLQHR.I	S81	UNI:Q8K1Z0	1.37481	0.0246184	1.98146e+06	1.98146e+06	586975	2567718	2248250	2522900	1.44126e+06	378480	1614842	1781153	1990572	894.343	0.224169	26.48	27.8076	0.982536	3	0		81900953	Ubiquinone biosynthesis protein COQ9, mitochondrial precursor	Q8K1Z0	COQ9_MOUSE		376750	0.224169	F	26.48	mitochondrion	ubiquinone biosynthetic process	metal ion binding
1960170	Heterogeneous nuclear ribonucleoprotein G	Manual Assigned Name:Heterogeneous nuclear ribonucleoprotein G SwissPROT>D3Z613_MOUSE>T163>Uncharacterized protein OS=Mus musculus GN=Gm7324 SwissPROT>HNRPG_MOUSE>T163>Heterogeneous nuclear ribonucleoprotein G OS=Mus musculus GN=Rbmx SwissPROT>Q91VM5_MOUSE>T163>Putative uncharacterized protein OS=Mus musculus GN=Rbmxrt IPI>O35479>T163>Heterogeneous nuclear ribonucleoprotein G IPI>Q91VM5>T163>Hete…	K.RST*PSGPVR.S	T163	UNI:O35479	1.37322	0.0466555	557454	557454	465386	467179	520956	776297	405947	295406	254902	248311	825169	518.75	0.310663	25.25	23.8995	0.293413	2	0		3914804	Heterogeneous nuclear ribonucleoprotein G (hnRNP G) (RNA binding motif protein, X chromosome)	O35479	Q91VM5_MOUSE		380361	0.310663	F	25.25	nucleus	mRNA processing regulation of transcription, DNA-dependent	nucleotide binding
1959483	Small acidic protein	Manual Assigned Name:Small acidic protein HPRD>18069_1>S15>SMAP SwissPROT>D6RI64_MOUSE>S15>Uncharacterized protein OS=Mus musculus GN=1110004F10Rik SwissPROT>SMAP_MOUSE>S15>Small acidic protein OS=Mus musculus GN=Smap IPI>Q9R0P4>S15>Small acidic protein IPI>IPI00127941.1>S15>1110004F10Rik Small acidic protein IPI>D6RI64>S15>Uncharacterized protein IPI>IPI00895097.1>S15>1110004F10Rik Uncharacteriz…	R.S*ASPDDDLGSSNWEAADLGNEER.K	S15*	UNI:Q9R0P4	1.36974	0.0461343	1.1429e+07	1.1429e+07	5364286	20344535	12371893	7635466	8.34396e+06	4329720	12748130	8587824	7710149	1258	1.91731	69.92	42.7187	0.877452	2	0		81907185	Small acidic protein (Sid 2057)	Q9R0P4	SMAP_MOUSE	18069_1	376233	0.702985	F	69.92	cellular_component	biological_process	molecular_function
1959789	Eukaryotic translation initiation factor 3 subunit C	Manual Assigned Name:Eukaryotic translation initiation factor 3 subunit C HPRD>04889_1>S39>EIF3S8 HPRD>04889_2>S39>EIF3S8 SwissPROT>EIF3C_MOUSE>S39>Eukaryotic translation initiation factor 3 subunit C OS=Mus musculus GN=Eif3c IPI>Q8R1B4>S39>Eukaryotic translation initiation factor 3 subunit C IPI>IPI00321647.2>S39>Eif3c Eukaryotic translation initiation factor 3 subunit C NCBI>81878875>S39>Eukary…	K.QPLLLS*EDEEDTKR.V	S39*	UNI:Q8R1B4	1.36018	0.0385491	1.17114e+07	1.17114e+07	17892326	9986829	11604308	7362289	8.61021e+06	13440047	7287066	6792150	6921585	876.906	0.135782	50.51	76.6883	0.260957	2	0		81878875	Eukaryotic translation initiation factor 3 subunit C (eIF3c) (Eukaryotic translation initiation factor 3 subunit 8) (eIF3 p110)	Q8R1B4	EIF3C_MOUSE	04889_2	376272	0.0753079	F	50.51	cytoplasm	translation	translation initiation factor activity protein binding
1958825	Small glutamine-rich tetratricopeptide repeat-containing protein alpha	Manual Assigned Name:Small glutamine-rich tetratricopeptide repeat-containing protein alpha SwissPROT>SGTA_MOUSE>T81>Isoform 2 of Small glutamine-rich tetratricopeptide repeat-containing protein alpha OS=Mus musculus GN=Sgta IPI>Q8BJU0>T82>Small glutamine-rich tetratricopeptide repeat-containing protein alpha IPI>Q8BJU0-2>T82>Isoform 2 of Small glutamine-rich tetratricopeptide repeat-containing p…	R.APDRT*PPSEEDSAEAER.L	T82*	UNI:Q8BJU0	1.35944	0.0246184	1.69931e+06	1.69931e+06	1410348	1460792	2196696	1729388	1.25001e+06	1208238	1046301	1512459	1233023	646.27	1.06826	59.86	34.9504	0.868299	3	0		41018011	Small glutamine-rich tetratricopeptide repeat-containing protein A [MASS=34322]	Q8BJU0	SGTA_MOUSE		370281	0.0304627	F	59.86	cytoplasm	regulation of transcription	binding
1958677	Yorkie homolog	Manual Assigned Name:Yorkie homolog HPRD>09424_1>Yes associated protein SwissPROT>Q3U046_MOUSE>Putative uncharacterized protein (Fragment) OS=Mus musculus GN=Yap1 SwissPROT>YAP1_MOUSE>Isoform 2 of Yorkie homolog OS=Mus musculus GN=Yap1 IPI>P46938>Yorkie homolog IPI>P46938-2>Isoform 2 of Yorkie homolog IPI>IPI00108989.4>Yap1 Isoform 1 of Yorkie homolog IPI>IPI00621717.2>Yap1 Isoform 2 of Yorkie ho…	R.GDS*ETDLEALFNAVMNPK.T	S46	UNI:P46938	1.35724	0.0359496	3.98791e+06	3.98791e+06	3532248	4930034	3501456		2.93825e+06	2831493	3757195	2226059		1015.94	1.33539	81.97	13.9794	0.911479	2	0		294862480	RecName: Full=Yorkie homolog; AltName: Full=65 kDa Yes-associated protein; Short=YAP65	P46938	YAP1_MOUSE	9424	385548	0.466793	F	81.97	nucleus transcription factor complex	regulation of transcription positive regulation of transcription from RNA polymerase II promoter regulation of transcription, DNA-dependent protein amino acid phosphorylation	protein binding
1959788	Nucleolar protein 58	Manual Assigned Name:Nucleolar protein 58 SwissPROT>NOP58_MOUSE>S509>Nucleolar protein 58 OS=Mus musculus GN=Nop58 IPI>Q6DFW4>S509>Nucleolar protein 58 IPI>IPI00463468.3>S509>Nop58 Nucleolar protein 58 NCBI>49901389>S509>Nol5 protein [Mus musculus] [MASS=60343] NCBI>148667719>S509>nucleolar protein 5, isoform CRA_b [Mus musculus] [MASS=60343] NCBI>148667718>S446>nucleolar protein 5, isoform CRA_a…	K.EEPLS*EEEPCTSTAVPSPEK.K	S509*	UNI:Q6DFW4	1.35712	0.0362381	5.82258e+06	5.82258e+06	5589827	6573086	10388263	739146	4.29038e+06	4135427	4506062	7801308	718739	1148.48	0.244778	40.4	47.8044	0.79053	2	0		49901389	Nol5 protein [Mus musculus] [MASS=60343]	Q6DFW4	NOP58_MOUSE		374089	0.244778	F	40.4	nucleus	ribosome biogenesis	protein binding
1959389	Cyclin-dependent kinase 11	Manual Assigned Name:Cyclin-dependent kinase 11 HPRD>00308_1>T736S737>Cell division cycle 2 like 2 HPRD>00308_2>T733S734>Cell division cycle 2 like 2 HPRD>00308_3>T353S354>Cell division cycle 2 like 2 HPRD>00308_4>T732S733>Cell division cycle 2 like 2 HPRD>00308_5>T726S727>Cell division cycle 2 like 2 HPRD>00308_6>T123S124>Cell division cycle 2 like 2 HPRD>00308_7>T731S732>Cell division cycle 2 l…	K.RGT*S*PRPPEGGLGYSQLGDDDLK.E	T740S741*	UNI:P24788	1.35709	0.040699	4.97702e+06	4.97702e+06	2300518	6548262	5897138	5162163	3.66742e+06	1973707	4214643	3688503	4792831	868.39	0.779055	21.46	37.947	0.0734022	3	0		57015295	PITSLRE serine/threonine-protein kinase CDC2L1 (Galactosyltransferase associated protein kinase p58/GTA) (Cell division cycle 2-like protein kinase 1)	P24788	CDK11_MOUSE	08909_8	389776	0.779055	F	21.46	nucleus intracellular mitochondrion	protein amino acid phosphorylation	protein binding ATP binding
1960424	Cyclin-dependent kinase 11	Manual Assigned Name:Cyclin-dependent kinase 11 HPRD>00308_1>T736S737>Cell division cycle 2 like 2 HPRD>00308_2>T733S734>Cell division cycle 2 like 2 HPRD>00308_3>T353S354>Cell division cycle 2 like 2 HPRD>00308_4>T732S733>Cell division cycle 2 like 2 HPRD>00308_5>T726S727>Cell division cycle 2 like 2 HPRD>00308_6>T123S124>Cell division cycle 2 like 2 HPRD>00308_7>T731S732>Cell division cycle 2 l…	K.RGT*S*PRPPEGGLGYSQLGDDDLK.E	T740S741*	UNI:P24788	1.35709	0.040699	4.97702e+06	4.97702e+06	2300518	6548262	5897138	5162163	3.66742e+06	1973707	4214643	3688503	4792831	859.046	0.0186399	20.41	49.8005	0.340108	3	0		57015295	PITSLRE serine/threonine-protein kinase CDC2L1 (Galactosyltransferase associated protein kinase p58/GTA) (Cell division cycle 2-like protein kinase 1)	P24788	CDK11_MOUSE	08909_8	389776	0.0186399	F	20.41	nucleus intracellular mitochondrion	protein amino acid phosphorylation	protein binding ATP binding
1959648	Microtubule-associated protein 1A	Manual Assigned Name:Microtubule-associated protein 1A HPRD>02549_1>S986>Microtubule associated protein 1A SwissPROT>A2ARP8_MOUSE>S1219>Microtubule-associated protein 1 A OS=Mus musculus GN=Mtap1a SwissPROT>MAP1A_MOUSE>S1205>Isoform 2 of Microtubule-associated protein 1A OS=Mus musculus GN=Map1a IPI>Q9QYR6>S981>Microtubule-associated protein 1A IPI>A2ARP8>S981>Microtubule-associated protein 1 A I…	R.CLS*PDDSTVK.M	S981	UNI:Q9QYR6	1.35448	0.0443826	2.11108e+06	2.11108e+06	3686759	1791564	2387437	578560	1.55859e+06	2758635	1230337	1646871	598525	601.244	0.189766	33.08	86.9402	0.874622	2	0		122065442	Microtubule-associated protein 1A (MAP 1A)	Q9QYR6	MAP1A_MOUSE	02549_1		0.189766	F	33.08	microtubule cytosol microtubule associated complex	negative regulation of microtubule depolymerization oxidation reduction sensory perception of sound	protein binding
1958666	Vimentin	Manual Assigned Name:Vimentin SwissPROT>VIME_MOUSE>Vimentin OS=Mus musculus GN=Vim IPI>P20152>Vimentin IPI>IPI00227299.6>Vim Vimentin IPI>E9PZV5>Uncharacterized protein NCBI>138536>Vimentin NCBI>148676107>vimentin, isoform CRA_b [Mus musculus] [MASS=53687] NCBI>123858292>vimentin [Mus musculus] NCBI>58476928>Vimentin [Mus musculus] NCBI>2078001>vimentin [Mus musculus] NCBI>202370>vimentin NCBI>55…	R.ISLPLPT*FSSLNLR.E	T417*	UNI:P20152	1.35436	0.030902	1.07354e+07	1.07354e+07	14196129	12486358	6169640	10089480	7.92655e+06	9080799	8947072	4447992	9230356	824.441	0.192976	20.32	12.1748	0.58962	2	0		138536	Vimentin	P20152	VIME_MOUSE		374414	0.192976	F	20.32	cytoplasm	intermediate filament-based process	protein binding
1958904	Cyclin-dependent kinase 12	Manual Assigned Name:Cyclin-dependent kinase 12 SwissPROT>B1AQH7_MOUSE>S807>"Cdc2-related kinase, arginine/serine-rich OS=Mus musculus GN=Cdk12" SwissPROT>CDK12_MOUSE>S1079>Isoform 3 of Cell division protein kinase 12 OS=Mus musculus GN=Cdk12 IPI>Q14AX6>S1079>Cyclin-dependent kinase 12 IPI>Q14AX6-2>S1079>Isoform 2 of Cyclin-dependent kinase 12 IPI>Q14AX6-3>S1079>Isoform 3 of Cyclin-dependent kina…	K.NNS*PAPPQPAPVK.A	S1079*	UNI:Q14AX6	1.35393	0.0246184	1.71633e+06	1.71633e+06	1133383	2025069	2792972	913882	1.26766e+06	688726	1446960	2233456	701513	698.834	0.438188	43.62	100	0.891644	2	0		166234056	Cell division cycle 2-related protein kinase 7 (CDC2-related protein kinase 7) (Cdc2-related kinase, arginine/serine-rich) (CrkRS)	Q14AX6	CDK12_MOUSE		370041	0.438188	F	43.62	nucleus mediator complex	protein amino acid phosphorylation	ATP binding
1958997	E3 ubiquitin-protein ligase UBR4	Manual Assigned Name:E3 ubiquitin-protein ligase UBR4 HPRD>10184_1>S2719>Retinoblastoma associated factor 600 SwissPROT>UBR4_MOUSE>S2744>Isoform 5 of E3 ubiquitin-protein ligase UBR4 OS=Mus musculus GN=Ubr4 IPI>A2AN08>S2716>E3 ubiquitin-protein ligase UBR4 IPI>A2AN08-3>S2716>Isoform 3 of E3 ubiquitin-protein ligase UBR4 IPI>A2AN08-5>S2716>Isoform 5 of E3 ubiquitin-protein ligase UBR4 IPI>IPI00378…	R.HVTLPSS*PR.S	S2716*	UNI:A2AN08	1.35362	0.0246184	1.85381e+07	1.85381e+07	23584851	17450813	18747242	14369439	1.36952e+07	16815221	11723162	14091876	12150531	537.261	0.715407	37.63	19.0849	0.876499	2	0		147742910	E3 ubiquitin-protein ligase UBR4 (N-recognin-4) (Zinc finger UBR1-type protein 1) (p600)	A2AN08	UBR4_MOUSE	10184_1	379987	0.14718	F	37.63	integral to membrane	modification-dependent protein catabolic process	zinc ion binding protein binding
1959673	E3 ubiquitin-protein ligase UBR4	Manual Assigned Name:E3 ubiquitin-protein ligase UBR4 HPRD>10184_1>S2718>Retinoblastoma associated factor 600 SwissPROT>UBR4_MOUSE>S2743>Isoform 5 of E3 ubiquitin-protein ligase UBR4 OS=Mus musculus GN=Ubr4 IPI>A2AN08>S2715>E3 ubiquitin-protein ligase UBR4 IPI>A2AN08-3>S2715>Isoform 3 of E3 ubiquitin-protein ligase UBR4 IPI>A2AN08-5>S2715>Isoform 5 of E3 ubiquitin-protein ligase UBR4 IPI>IPI00378…	R.HVTLPS*SPR.S	S2715*	UNI:A2AN08	1.35362	0.0246184	1.85381e+07	1.85381e+07	23584851	17450813	18747242	14369439	1.36952e+07	16815221	11723162	14091876	12150531	542.265	0.284258	33.57	37.6956	0.943816	2	0		147742910	E3 ubiquitin-protein ligase UBR4 (N-recognin-4) (Zinc finger UBR1-type protein 1) (p600)	A2AN08	UBR4_MOUSE	10184_1	379987	0.0572208	F	33.57	integral to membrane	modification-dependent protein catabolic process	zinc ion binding protein binding
1960168	Heterogeneous nuclear ribonucleoprotein D0	Manual Assigned Name:Heterogeneous nuclear ribonucleoprotein D0 HPRD>03206_1>S83>Heterogeneous nuclear ribonucleoprotein D HPRD>03206_3>S83>Heterogeneous nuclear ribonucleoprotein D IPI>Q60668>S83>Heterogeneous nuclear ribonucleoprotein D0 IPI>Q60668-3>S83>Isoform 3 of Heterogeneous nuclear ribonucleoprotein D0 IPI>IPI00330958.2>S83>Hnrnpd Isoform 1 of Heterogeneous nuclear ribonucleoprotein D0 I…	K.IDASKNEEDEGHSNSS*PR.H	S83*	UNI:Q60668	1.35289	0.0461343	3.50551e+06	3.50551e+06	979249	1157082	922411	10963304	2.59112e+06	688931	957729	349590	8368243	690.622	1.26628	30.51		0.837975	3	0		33516945	Heterogeneous nuclear ribonucleoprotein D0 (hnRNP D0) (AU-rich element RNA-binding protein 1) [MASS=38354]	Q60668	HNRPD_MOUSE	03206_3	386449	1.26628	F	30.51	nucleus	regulation of transcription, DNA-dependent regulation of transcription nucleocytoplasmic transport	protein binding
1959297	Ahnak AHNAK nucleoprotein isoform 1	Manual Assigned Name:Ahnak AHNAK nucleoprotein isoform 1 SwissPROT>Q8BRB8_MOUSE>Putative uncharacterized protein (Fragment) OS=Mus musculus GN=Ahnak IPI>IPI00553798.2>Ahnak AHNAK nucleoprotein isoform 1 IPI>E9Q616>Uncharacterized protein NCBI>61743961>AHNAK nucleoprotein isoform 1 [Mus musculus] [MASS=604249] NCBI>74141032>unnamed protein product [Mus musculus] [MASS=12936] NCBI>26337133>unnamed …	R.LPSGS*GPAS*PTTGSAVDIR.A	S213S217	UNI:IPI00553798.2	1.35189	0.031747	3.69081e+07	3.69081e+07	21749992	42225155	44941446	38715937	2.7301e+07	14884596	28138693	30017097	36163790	643.951	0.854476	22.6	5.31305	0.268114	3	0		61743961	AHNAK nucleoprotein isoform 1 [Mus musculus] [MASS=604249]	IPI00553798.2	Q8BRB8_MOUSE			0.854476	F	22.6	mitochondrion	protein amino acid phosphorylation	protein binding
1960342	KN motif and ankyrin repeat domain-containing protein 2	Manual Assigned Name:KN motif and ankyrin repeat domain-containing protein 2 HPRD>13865_1>S137>Immunoglobulin superfamily containing leucine-rich repeat 2 SwissPROT>ISLR2_MOUSE>S137>Immunoglobulin superfamily containing leucine-rich repeat protein 2 OS=Mus musculus GN=Islr2 SwissPROT>KANK2_MOUSE>S72>Isoform 2 of KN motif and ankyrin repeat domain-containing protein 2 OS=Mus musculus GN=Kank2 IPI>…	R.LGS*LPR.D	S72	UNI:Q8BX02	1.34901	0.0396527	2.45357e+06	2.45357e+06	3608116	2686875	2267134	1252172	1.8188e+06	2117580	2461501	1659631	1036475	361.684	0.537128	31.91	100	0.787694	2	0		81897880	KN motif and ankyrin repeat domain-containing protein 2 (Ankyrin repeat domain-containing protein 25)	Q8BX02	KANK2_MOUSE	13865_1	376947	0.537128	F	31.91	integral to membrane intracellular	regulation of transcription, DNA-dependent signal transduction	protein binding	Phenylalanine metabolism Ubiquinone and other terpenoid-quinone biosynthesis Lysosome Glycosaminoglycan degradation
1959179	SEC16 homolog A (S. cerevisiae)	Manual Assigned Name:SEC16 homolog A (S. cerevisiae) SwissPROT>A2AIX1_MOUSE>S1028>SEC16 homolog A (S. cerevisiae) OS=Mus musculus GN=Sec16a IPI>A2AIX1>S1028>SEC16 homolog A (S. cerevisiae) IPI>IPI00627000.4>S1028>Sec16a SEC16 homolog A IPI>IPI00755905.1>S1028>Sec16a SEC16 homolog A IPI>E9QAT4>S1028>Uncharacterized protein NCBI>123228045>S1028>SEC16 homolog A (S. cerevisiae) [Mus musculus] [MASS=2…	R.MYS*PSPSDGPASQQPLPNHPR.Q	S1028	UNI:A2AIX1	1.34569	0.0346121	5.71286e+06	5.71286e+06	4174811	6805133	7265800	4605685	4.24531e+06	3580417	5229770	4349950	3821106	785.015	0.0560979	21.22	18.6273	0.865814	3	0		123228045	SEC16 homolog A (S. cerevisiae) [Mus musculus] [MASS=256471]	A2AIX1	A2AIX1_MOUSE			0.0560979	F	21.22
1959072	Prelamin-A/C	Manual Assigned Name:Prelamin-A/C HPRD>01035_1>S390S392>Lamin A/C HPRD>01035_2>S390S392>Lamin A/C HPRD>01035_3>S390S392>Lamin A/C HPRD>01035_4>S390S392>Lamin A/C SwissPROT>LAMA_MOUSE>S390S392>Lamin A SwissPROT>LAMC_MOUSE>S390S392>Lamins C and C2 SwissPROT>LMNA_MOUSE>S278S280>Isoform C2 of Prelamin-A/C OS=Mus musculus GN=Lmna IPI>P48678>S390S392>Prelamin-A/C IPI>P48678-2>S390S392>Isoform C of Prel…	R.LRLS*PS*PTSQR.S	S390S392*	UNI:P48678	1.34484	0.0366099	4.17657e+07	4.17657e+07	40565475	57939967	35242861	33314489	3.10563e+07	28137295	40023087	23474679	32590229	701.318	0.0727725	36.4	26.7524	0.841095	2	0		85700428	Lamin-A/C	P48678	LMNA_MOUSE	01035_4	375038	0.0727725	F	36.4	nucleus intermediate filament	spermatogenesis DNA repair DNA metabolic process G-protein coupled receptor protein signaling pathway mismatch repair	protein binding structural molecule activity	Hypertrophic cardiomyopathy (HCM) Arrhythmogenic right ventricular cardiomyopathy (ARVC) Dilated cardiomyopathy
1959091	Prelamin-A/C	Manual Assigned Name:Prelamin-A/C HPRD>01035_1>S390S395>Lamin A/C HPRD>01035_2>S390S395>Lamin A/C HPRD>01035_3>S390S395>Lamin A/C HPRD>01035_4>S390S395>Lamin A/C SwissPROT>LAMA_MOUSE>S390S395>Lamin A SwissPROT>LAMC_MOUSE>S390S395>Lamins C and C2 SwissPROT>LMNA_MOUSE>S278S283>Isoform C2 of Prelamin-A/C OS=Mus musculus GN=Lmna IPI>P48678>S390S395>Prelamin-A/C IPI>P48678-2>S390S395>Isoform C of Prel…	R.LRLS*PSPTS*QR.S	S390S395*	UNI:P48678	1.34484	0.0366099	4.17657e+07	4.17657e+07	40565475	57939967	35242861	33314489	3.10563e+07	28137295	40023087	23474679	32590229	711.326	0.113952	32.44	16.8409	0.744615	2	0		85700428	Lamin-A/C	P48678	LMNA_MOUSE	01035_4	375038	0.113952	F	32.44	nucleus intermediate filament	spermatogenesis DNA repair DNA metabolic process G-protein coupled receptor protein signaling pathway mismatch repair	protein binding structural molecule activity	Hypertrophic cardiomyopathy (HCM) Arrhythmogenic right ventricular cardiomyopathy (ARVC) Dilated cardiomyopathy
1959685	Archvillin	Manual Assigned Name:Archvillin SwissPROT>Q8K4L2_MOUSE>S857>Archvillin OS=Mus musculus GN=Svil SwissPROT>SVIL_MOUSE>S857>Isoform 1 of Supervillin OS=Mus musculus GN=Svil IPI>Q8K4L2>S857>Archvillin IPI>Q8K4L3>S857>Supervillin IPI>IPI00170232.2>S857>Svil Supervillin IPI>IPI00918064.1>S857>Svil Archvillin IPI>IPI00918245.2>S857>Svil Svil protein IPI>E9PVA9>S857>Uncharacterized protein IPI>E9Q3Z5>S85…	R.KLS*VDNNTSATDYK.S	S857	UNI:Q8K4L2	1.34331	0.0440881	792630	792630	597126	957471	1071993	543929	590059	335475	640673	852962	531128	826.381	0.443165	41.5	27.928	0.836011	2	0		57013084	Supervillin (Archvillin) (p205/p250) [MASS=243160]	Q8K4L2	SVIL_MOUSE		373337	0.443165	F	41.5	nucleus	cytoskeleton organization skeletal muscle tissue development	calcium ion binding actin binding
1958754	Transcription elongation factor A protein 1	Manual Assigned Name:Transcription elongation factor A protein 1 SwissPROT>TCEA1_MOUSE>S65>Isoform 1 of Transcription elongation factor A protein 1 OS=Mus musculus GN=Tcea1 IPI>P10711>S100>Transcription elongation factor A protein 1 IPI>P10711-2>S100>Isoform 1 of Transcription elongation factor A protein 1 IPI>IPI00121887.5>S100>Tcea1 Isoform 2 of Transcription elongation factor A protein 1 IPI>I…	K.KKEPAISSQNS*PEAR.E	S100*	UNI:P10711	1.34275	0.0313815	4.84172e+06	4.84172e+06	2990483	3994959	4403452	7978002	3.60583e+06	1850563	2693763	2625312	7253671	574.611	1.76674	42.07	37.69	0.539711	3	0		28380825	Transcription elongation factor A protein 1 (Transcription elongation factor S-II protein 1) (Transcription elongation factor TFIIS.o)	P10711	TCEA1_MOUSE		379751	0.0644666	F	42.07	nucleus	regulation of transcription, DNA-dependent	protein binding
1960145	Zc3h13 Zinc finger CCCH type containing 13	Manual Assigned Name:Zc3h13 Zinc finger CCCH type containing 13 SwissPROT>B9EHN9_MOUSE>Zinc finger CCCH type containing 13 OS=Mus musculus GN=Zc3h13 IPI>IPI00515528.3>Zc3h13 Zinc finger CCCH type containing 13 IPI>E9PW62>Uncharacterized protein IPI>E9Q784>Uncharacterized protein IPI>IPI00515528.2>Zc3h13 RIKEN cDNA 3110050K21 NCBI>223461012>Zinc finger CCCH type containing 13 [Mus musculus] [MASS=…	R.T*PS*PPPPILEDIILGK.K	T263S265	UNI:IPI00515528.3	1.34232	0.0289648	4.28416e+06	4.28416e+06	2963194	5634089	4255203		3.19161e+06	1964783	4321220	3288836		923.955	0.876062	48.87	100	0.925506	2	0		223461012	Zinc finger CCCH type containing 13 [Mus musculus] [MASS=203825]	IPI00515528.3	B9EHN9_MOUSE		372585	0.876062	F	48.87	nucleus integral to membrane	regulation of ARF GTPase activity transport	zinc ion binding
1959807	Ubiquitin carboxyl-terminal hydrolase	Manual Assigned Name:Ubiquitin carboxyl-terminal hydrolase HPRD>03950_1>Ubiquitin specific protease 7 SwissPROT>E0CY04_MOUSE>Uncharacterized protein OS=Mus musculus GN=Usp7 SwissPROT>UBP7_MOUSE>Isoform 3 of Ubiquitin carboxyl-terminal hydrolase 7 OS=Mus musculus GN=Usp7 IPI>E9QLK0>Ubiquitin carboxyl-terminal hydrolase IPI>Q6A4J8>Ubiquitin carboxyl-terminal hydrolase 7 IPI>Q6A4J8-3>Isoform 3 of Ub…	K.AGEQQLS*EPEDMEMEAGDTDDPPR.I	S19*	UNI:E9QLK0	1.33595	0.0490369	7.79672e+06	7.79672e+06	4192635	10165789	9802883	7025586	5.83608e+06	2771166	5995849	7174236	7403082	909.687	1.22403	21.85	41.0567	0.83116	3	0		81891295	Ubiquitin carboxyl-terminal hydrolase 7 (Ubiquitin thioesterase 7) (Ubiquitin-specific-processing protease 7) (Deubiquitinating enzyme 7) (Herpesvirus-associated ubiquitin-specific protease) (mHAUSP)	E9QLK0	E9QLK0_MOUSE	3950		1.22403	F	21.85	nucleus	modification-dependent protein catabolic process	hydrolase activity protein binding
1959252	Protein phosphatase 1 regulatory subunit 12A	Manual Assigned Name:Protein phosphatase 1 regulatory subunit 12A SwissPROT>MYPT1_MOUSE>S299>Isoform 2 of Protein phosphatase 1 regulatory subunit 12A OS=Mus musculus GN=Ppp1r12a IPI>Q9DBR7>S299>Protein phosphatase 1 regulatory subunit 12A IPI>Q9DBR7-2>S299>Isoform 2 of Protein phosphatase 1 regulatory subunit 12A IPI>IPI00671847.3>S299>Ppp1r12a Isoform 1 of Protein phosphatase 1 regulatory subun…	K.S*PLIESTANMENNQPQK.A	S299	UNI:Q9DBR7	1.33363	0.0285086	8.77914e+06	8.77914e+06	5502468	10503647	13679388	5431048	6.5829e+06	4327233	6987263	10143121	4874000	660.963	0.00100966	32.78	22.5563	0.914212	3	0		281185473	RecName: Full=Protein phosphatase 1 regulatory subunit 12A; AltName: Full=Myosin phosphatase-targeting subunit 1; Short=Myosin phosphatase target subunit 1	Q9DBR7	MYPT1_MOUSE		385473	0.00100966	F	32.78	cytoplasm intracellular membrane-bounded organelle	integrin-mediated signaling pathway protein amino acid dephosphorylation	protein binding	Regulation of actin cytoskeleton Vascular smooth muscle contraction Focal adhesion Long-term potentiation
1959276	N(2),N(2)-dimethylguanosine tRNA methyltransferase	Manual Assigned Name:N(2),N(2)-dimethylguanosine tRNA methyltransferase SwissPROT>D3Z1P5_MOUSE>S121>Uncharacterized protein OS=Mus musculus GN=Trmt1 SwissPROT>D3Z413_MOUSE>S124>Uncharacterized protein OS=Mus musculus GN=Trmt1 SwissPROT>Q3TD26_MOUSE>S114>Putative uncharacterized protein OS=Mus musculus GN=Trmt1 SwissPROT>TRM1_MOUSE>S121>"N(2),N(2)-dimethylguanosine tRNA methyltransferase OS=Mus mu…	K.IAVDLS*DQEEETAGK.N	S121	UNI:Q3TX08	1.33336	0.0243568	5.56034e+06	5.56034e+06	7468862	6077095	5632584	3062809	4.17016e+06	5452178	4582205	4645230	2001017	842.869	0.82031	92.31	100.144	0.951918	2	0		84029593	N(2),N(2)-dimethylguanosine tRNA methyltransferase (tRNA(guanine-26,N(2)-N(2)) methyltransferase) (tRNA 2,2-dimethylguanosine-26 methyltransferase) (tRNA(m(2,2)G26)dimethyltransferase) [MASS=72349]	Q3TX08	TRM1_MOUSE		369868	0.749081	F	92.31	intracellular integral to membrane	tRNA processing	zinc ion binding
1959756	Cobl-like 1	Manual Assigned Name:Cobl-like 1 SwissPROT>B1AZ14_MOUSE>S1183>Cobl-like 1 OS=Mus musculus GN=Cobll1 SwissPROT>B1AZ15_MOUSE>S1182>Cobl-like 1 OS=Mus musculus GN=Cobll1 SwissPROT>COBL1_MOUSE>S1145>Isoform 4 of Cordon-bleu protein-like 1 OS=Mus musculus GN=Cobll1 IPI>B1AZ14>S1183>Cobl-like 1 IPI>B1AZ15>S1183>Cobl-like 1 IPI>Q3UMF0>S1183>Cordon-bleu protein-like 1 IPI>Q3UMF0-2>S1183>Isoform 2 of Cord…	R.QSS*LTFQSSDPEHVR.Q	S1183	UNI:B1AZ14	1.33245	0.0396527	2.47698e+07	2.47698e+07	31266706	28781299	28210853	10820410	1.85897e+07	21052275	21396024	21195420	10714890	603.268	0.233988	31.33	12.1307	0.873216	3	0		118568015	Cordon-bleu protein-like 1 (Cobl-related protein 1) [MASS=137381]	B1AZ14	COBL1_MOUSE		386496	0.233988	F	31.33
1959425	Apoptotic chromatin condensation inducer 1 (Fragment)	Manual Assigned Name:Apoptotic chromatin condensation inducer 1 (Fragment) SwissPROT>ACINU_MOUSE>S349S351>Isoform 4 of Apoptotic chromatin condensation inducer in the nucleus OS=Mus musculus GN=Acin1 SwissPROT>B8JJ87_MOUSE>S389S391>Apoptotic chromatin condensation inducer 1 OS=Mus musculus GN=Acin1 SwissPROT>B8JJ88_MOUSE>S334S336>Apoptotic chromatin condensation inducer 1 (Fragment) OS=Mus muscul…	K.SQS*PS*PPPLPEDLEK.A	S243S245	UNI:B8JJ89	1.33169	0.0396527	1.76779e+07	1.76779e+07	11584120	29944341	21336233	7846850	1.32748e+07	8574969	21271239	15394229	7858648	890.876	0.829989	48.93	10.7966	0.872309	2	0		9622185	acinusL protein [Mus musculus]	B8JJ89	B8JJ89_MOUSE		372668	0.352661	F	48.93	nucleus	apoptosis erythrocyte differentiation	nucleotide binding
1960045	Hormone-sensitive lipase	Manual Assigned Name:Hormone-sensitive lipase SwissPROT>LIPS_MOUSE>S650>Hormone-sensitive lipase OS=Mus musculus GN=Lipe SwissPROT>Q8CDI9_MOUSE>S693>Putative uncharacterized protein OS=Mus musculus GN=Lipe IPI>P54310>S650>Hormone-sensitive lipase IPI>IPI00469416.3>S650>Lipe Hormone-sensitive lipase IPI>IPI00228826.1>S650>Lipe lipase E isoform 1 IPI>E9Q4M2>S650>Uncharacterized protein IPI>Q8CDI9>S…	R.RS*SQGVLHMPLYTSPIVK.N	S650*	UNI:P54310	1.33133	0.0285086	4.67575e+06	4.67575e+06	5363664	4113839	2293192	6932288	3.51209e+06	3300137	3049044	1690141	6009052	709.698	0.169716	27.43	16.1452	0.850761	3	0		85690846	Hormone-sensitive lipase (HSL)	P54310	Q8CDI9_MOUSE		370042	0.169716	F	27.43	nucleus cytosol	metabolic process	protein binding	Insulin signaling pathway
1958869	RNA-binding protein 10	Manual Assigned Name:RNA-binding protein 10 HPRD>02095_1>S723>RNA binding motif protein 10 HPRD>02095_2>S645>RNA binding motif protein 10 SwissPROT>RBM10_MOUSE>S722>Isoform 3 of RNA-binding protein 10 OS=Mus musculus GN=Rbm10 IPI>Q99KG3>S723>RNA-binding protein 10 IPI>Q99KG3-2>S723>Isoform 2 of RNA-binding protein 10 IPI>Q99KG3-3>S723>Isoform 3 of RNA-binding protein 10 IPI>IPI00116031.3>S723>Rbm…	K.LASDDRPS*PPR.G	S723*	UNI:Q99KG3	1.32882	0.028313	3.86867e+06	3.86867e+06	4203076	3633370	4269811	3368437	2.91136e+06	3477800	2862811	3251743	2053105	430.866	0.405243	25.05	16.2688	0.373187	3	0		81880120	RecName: Full=RNA-binding protein 10; AltName: Full=RNA-binding motif protein 10	Q99KG3	RBM10_MOUSE	02095_2	385223	0.405243	F	25.05	nucleus intracellular	regulation of transcription mRNA processing translation	zinc ion binding
1959977	Serine/arginine repetitive matrix 1	Manual Assigned Name:Serine/arginine repetitive matrix 1 SwissPROT>A2A8V8_MOUSE>S220>Serine/arginine repetitive matrix 1 OS=Mus musculus GN=Srrm1 SwissPROT>A2A8V9_MOUSE>S220>Serine/arginine repetitive matrix 1 OS=Mus musculus GN=Srrm1 SwissPROT>SRRM1_MOUSE>S220>Isoform 2 of Serine/arginine repetitive matrix protein 1 OS=Mus musculus GN=Srrm1 IPI>A2A8V8>S220>Serine/arginine repetitive matrix 1 IPI…	K.EKS*PELPEPSVR.M	S220*	UNI:A2A8V8	1.32874	0.0105956	1.51163e+07	1.51163e+07	20883077	15034531	13713510	10834224	1.13764e+07	15207797	11001554	10812680	8483704	724.344	0.857923	30.61	54.1573	0.780666	2	0		347595715	RecName: Full=Serine/arginine repetitive matrix protein 1; AltName: Full=Plenty-of-prolines 101	A2A8V8	SRRM1_MOUSE		375402	0.857923	F	30.61	nucleus	mRNA processing	DNA binding zinc ion binding
1959065	Prelamin-A/C	Manual Assigned Name:Prelamin-A/C HPRD>01035_1>S390>Lamin A/C HPRD>01035_2>S390>Lamin A/C HPRD>01035_3>S390>Lamin A/C HPRD>01035_4>S390>Lamin A/C SwissPROT>LAMA_MOUSE>S390>Lamin A SwissPROT>LAMC_MOUSE>S390>Lamins C and C2 SwissPROT>LMNA_MOUSE>S278>Isoform C2 of Prelamin-A/C OS=Mus musculus GN=Lmna IPI>P48678>S390>Prelamin-A/C IPI>P48678-2>S390>Isoform C of Prelamin-A/C IPI>P48678-3>S390>Isoform C…	R.LRLS*PSPTSQR.S	S390*	UNI:P48678	1.32831	0.0386766	3.16943e+07	3.16943e+07	53474375	34443759	19306659	19552311	2.38607e+07	40754053	22972486	12658618	19057540	661.335	0.308702	43.82	32.1312	0.769661	2	0		85700428	Lamin-A/C	P48678	LMNA_MOUSE	01035_4	375038	0.308702	F	43.82	nucleus intermediate filament	spermatogenesis DNA repair DNA metabolic process G-protein coupled receptor protein signaling pathway mismatch repair	protein binding structural molecule activity	Hypertrophic cardiomyopathy (HCM) Arrhythmogenic right ventricular cardiomyopathy (ARVC) Dilated cardiomyopathy
1959370	Insulin-like growth factor 2 mRNA-binding protein 3	Manual Assigned Name:Insulin-like growth factor 2 mRNA-binding protein 3 SwissPROT>IF2B3_MOUSE>S165>Insulin-like growth factor 2 mRNA-binding protein 3 OS=Mus musculus GN=Igf2bp3 IPI>Q9CPN8>S165>Insulin-like growth factor 2 mRNA-binding protein 3 IPI>IPI00331315.9>S165>Igf2bp3 Insulin-like growth factor 2 mRNA-binding protein 3 NCBI>81916748>S165>Insulin-like growth factor 2 mRNA-binding protein …	K.VAYIPDETAAQQNPS*PQLR.G	S165	UNI:Q9CPN8	1.32789	0.0184417	3.02219e+07	3.02219e+07	20013900	36763326	37770285	26339962	2.27592e+07	15012703	29908644	26340103	19775533	726.679	0.34389	33.53	78.6186	0.951637	3	0		81916748	Insulin-like growth factor 2 mRNA-binding protein 3 (IGF2 mRNA-binding protein 3) (IGF-II mRNA-binding protein 3) (IMP-3) (mIMP-3) (VICKZ family member 3)	Q9CPN8	IF2B3_MOUSE		375883	0.34389	F	33.53	nucleus	regulation of translation	protein binding
1960166	RNA-binding protein 26	Manual Assigned Name:RNA-binding protein 26 HPRD>12611_1>S127>Cutaneous T cell lymphoma tumor antigen se70-2 SwissPROT>RBM26_MOUSE>S127>Isoform 5 of RNA-binding protein 26 OS=Mus musculus GN=Rbm26 IPI>Q6NZN0>S127>RNA-binding protein 26 IPI>Q6NZN0-2>S127>Isoform 2 of RNA-binding protein 26 IPI>Q6NZN0-3>S127>Isoform 3 of RNA-binding protein 26 IPI>Q6NZN0-4>S127>Isoform 4 of RNA-binding protein 26 I…	R.LNHS*PPQSSSR.Y	S127*	UNI:Q6NZN0	1.32758	0.0379408	1.49387e+06	1.49387e+06	1017362	1825846	1520019	1612253	1.12526e+06	761940	1094750	1121698	1522635	430.526	0.479232	32.2	25.0673	0.512337	3	0		124021003	RNA-binding protein 26 (RNA-binding motif protein 26) [MASS=114142]	Q6NZN0	RBM26_MOUSE	12611_1	372643	0.479232	F	32.2	nucleus	mRNA processing	protein binding zinc ion binding
1959897	D(1B) dopamine receptor	Manual Assigned Name:D(1B) dopamine receptor HPRD>00542_1>S261>Dopamine receptor, D5 SwissPROT>ASPM_MOUSE>S598>Abnormal spindle-like microcephaly-associated protein homolog OS=Mus musculus GN=Aspm SwissPROT>B1ARM7_MOUSE>S598>"Asp (Abnormal spindle)-like, microcephaly associated (Drosophila) OS=Mus musculus GN=Aspm" SwissPROT>B1ARM8_MOUSE>S598>"Asp (Abnormal spindle)-like, microcephaly associated …	R.ISS*LER.S	S255	UNI:Q8BLD9	1.32556	0.0404854	1.58997e+06	1.58997e+06	1290965	1849783	1660191	1558923	1.19947e+06	875204	1269234	1076411	1577013	392.684	0.155541	20.42	30.193	0.328321	2	0		47115791	D(1B) dopamine receptor (D(5) dopamine receptor)	Q8BLD9	DRD5_MOUSE	00542_1	378265	0.155541	F	20.42	nucleus integral to membrane nuclear pore spindle pole	cell cycle G-protein coupled receptor protein signaling pathway proteolysis negative regulation of neuron differentiation	calmodulin binding receptor activity protein binding DNA binding peptidase activity	Calcium signaling pathway Neuroactive ligand-receptor interaction Gap junction
1958818	Eukaryotic translation initiation factor 3 subunit B	Manual Assigned Name:Eukaryotic translation initiation factor 3 subunit B SwissPROT>Q8CIJ3_MOUSE>Eif3b protein OS=Mus musculus GN=Eif3b IPI>Q8JZQ9>Eukaryotic translation initiation factor 3 subunit B IPI>IPI00229859.1>Eif3b Eif3b protein IPI>E9PX78>Uncharacterized protein IPI>IPI00761592.1>Eif3b 109 kDa protein NCBI>81914516>Eukaryotic translation initiation factor 3 subunit B (Eukaryotic transla…	R.GHPSAGAEEEGGS*DGS*AAEAEPR.A	S120S123	UNI:Q8JZQ9	1.32381	0.0246184	617257	617257	496642	681146	801491	489749	466273	339282	508248	594170	423393	1169.43	0.244669	71.82	63.1704	0.547666	2	0		81914516	Eukaryotic translation initiation factor 3 subunit B (Eukaryotic translation initiation factor 3 subunit 9) (eIF-3-eta) (eIF3 p116)	Q8JZQ9	EIF3B_MOUSE		387347	0.244669	F	71.82	cytoplasm	translation	nucleotide binding
1958862	Apolipoprotein A-I-binding protein	Manual Assigned Name:Apolipoprotein A-I-binding protein SwissPROT>AIBP_MOUSE>S43>Apolipoprotein A-I-binding protein OS=Mus musculus GN=Apoa1bp IPI>Q8K4Z3>S43>Apolipoprotein A-I-binding protein IPI>IPI00170307.1>S43>Apoa1bp Apolipoprotein A-I-binding protein NCBI>81878684>S43>Apolipoprotein A-I-binding protein precursor (AI-BP) NCBI>50086711>S43>apolipoprotein A-I binding protein [Mus musculus] NC…	R.RGS*ETMAGAAVK.Y	S43	UNI:Q8K4Z3	1.32322	0.0230352	8.1715e+06	8.1715e+06	8265249	9115044	8895354	6410357	6.17549e+06	5870936	6521311	6924188	5385522	638.298	0.688309	54.18	26.0224	0.745176	2	0		81878684	Apolipoprotein A-I-binding protein precursor (AI-BP)	Q8K4Z3	AIBP_MOUSE		375041	0.0141111	F	54.18	extracellular region	protein folding	protein binding
1958999	Swi5-dependent recombination DNA repair protein 1 homolog	Manual Assigned Name:Swi5-dependent recombination DNA repair protein 1 homolog SwissPROT>CJ078_MOUSE>S67T70>Uncharacterized protein C10orf78 homolog OS=Mus musculus SwissPROT>Q3TH62_MOUSE>S67T70>Putative uncharacterized protein OS=Mus musculus GN=6330577E15Rik IPI>Q8BP27>S67T70>Swi5-dependent recombination DNA repair protein 1 homolog IPI>Q8BP27-2>S67T70>Isoform 2 of Swi5-dependent recombination …	R.ENPPS*PPT*SPAAPQPR.E	S67T70	UNI:Q8BP27	1.32153	0.0246184	2.73407e+06	2.73407e+06	2201380	3139031	3110101	2485786	2.06887e+06	1599057	2101018	2515011	2060387	901.878	1.13271	47.96	32.6992	0.898858	2	0		19353460	6330577E15Rik protein [Mus musculus]	Q8BP27	Q3TH62_MOUSE		373715	1.13271	F	47.96
1959674	Swi5-dependent recombination DNA repair protein 1 homolog	Manual Assigned Name:Swi5-dependent recombination DNA repair protein 1 homolog SwissPROT>CJ078_MOUSE>S67S71>Uncharacterized protein C10orf78 homolog OS=Mus musculus SwissPROT>Q3TH62_MOUSE>S67S71>Putative uncharacterized protein OS=Mus musculus GN=6330577E15Rik IPI>Q8BP27>S67S71>Swi5-dependent recombination DNA repair protein 1 homolog IPI>Q8BP27-2>S67S71>Isoform 2 of Swi5-dependent recombination …	R.ENPPS*PPTS*PAAPQPR.E	S67S71	UNI:Q8BP27	1.32153	0.0246184	2.73407e+06	2.73407e+06	2201380	3139031	3110101	2485786	2.06887e+06	1599057	2101018	2515011	2060387	901.878	1.47109	24.07	18.5456	0.766357	2	0		19353460	6330577E15Rik protein [Mus musculus]	Q8BP27	Q3TH62_MOUSE		373715	1.47109	F	24.07
1958925	Formin-like protein 2	Manual Assigned Name:Formin-like protein 2 HPRD>13545_1>S171>Formin like 2 HPRD>13545_2>S171>Formin like 2 HPRD>13545_3>S171>Formin like 2 HPRD>13545_4>S171>Formin like 2 SwissPROT>FMNL2_MOUSE>S171>Isoform 3 of Formin-like protein 2 OS=Mus musculus GN=Fmnl2 IPI>A2APV2>S171>Formin-like protein 2 IPI>A2APV2-2>S171>Isoform 2 of Formin-like protein 2 IPI>A2APV2-3>S171>Isoform 3 of Formin-like protein…	R.S*IEDLHR.G	S171*	UNI:A2APV2	1.32092	0.0388827	1.85947e+06	1.85947e+06	1589496	2427721	2286600	1134050	1.4077e+06	1309801	1981212	1353986	985815	475.21	0.771003	29.32	100	0.844102	2	0		148886616	Formin-like protein 2 (Protein Man) [MASS=123100]	A2APV2	FMNL2_MOUSE	13545_4		0.1285	F	29.32	cytoplasm	actin cytoskeleton organization	actin binding	Pyrimidine metabolism
1958716	High mobility group protein HMGI-C	Manual Assigned Name:High mobility group protein HMGI-C SwissPROT>HMGA2_MOUSE>S104>High mobility group protein HMGI-C OS=Mus musculus GN=Hmga2 SwissPROT>HMGIC_MOUSE>S104>High mobility group protein HMGI-C (High mobility group AT-hook 2) IPI>P52927>S104>High mobility group protein HMGI-C IPI>IPI00331612.3>S104>Hmga2 High mobility group protein HMGI-C NCBI>1708264>S104>High mobility group protein H…	K.KPAQETEETSSQES*AEED.-	S104	UNI:P52927	1.31835	0.0329207	1.41351e+06	1.41351e+06	711679	1437026	2071892	1433441	1.07218e+06	664301	1112919	1402602	1108907	1037.9	0.593793	64.71	61.229	0.709561	2	0		1708264	High mobility group protein HMGI-C (High mobility group AT-hook 2)	P52927	HMGIC_MOUSE			0.241951	F	64.71	nucleus	regulation of transcription, DNA-dependent	protein binding
1958769	Prelamin-A/C	Manual Assigned Name:Prelamin-A/C HPRD>01035_1>S390>Lamin A/C HPRD>01035_2>S390>Lamin A/C HPRD>01035_3>S390>Lamin A/C HPRD>01035_4>S390>Lamin A/C SwissPROT>LAMA_MOUSE>S390>Lamin A SwissPROT>LAMC_MOUSE>S390>Lamins C and C2 SwissPROT>LMNA_MOUSE>S278>Isoform C2 of Prelamin-A/C OS=Mus musculus GN=Lmna IPI>P48678>S390>Prelamin-A/C IPI>P48678-2>S390>Isoform C of Prelamin-A/C IPI>P48678-3>S390>Isoform C…	R.LS*PSPTSQR.S	S390*	UNI:P48678	1.31567	0.026975	6.63453e+06	6.63453e+06	4244049	7958375	8130812	6204890	5.0427e+06	3135156	5695985	5711294	5628346	526.742	0.790517	20.45	53.8485	0.780452	2	0		85700428	Lamin-A/C	P48678	LMNA_MOUSE	01035_4	375038	0.790517	F	20.45	nucleus intermediate filament	spermatogenesis DNA repair DNA metabolic process G-protein coupled receptor protein signaling pathway mismatch repair	protein binding structural molecule activity	Hypertrophic cardiomyopathy (HCM) Arrhythmogenic right ventricular cardiomyopathy (ARVC) Dilated cardiomyopathy
1959871	Prelamin-A/C	Manual Assigned Name:Prelamin-A/C HPRD>01035_1>S392>Lamin A/C HPRD>01035_2>S392>Lamin A/C HPRD>01035_3>S392>Lamin A/C HPRD>01035_4>S392>Lamin A/C SwissPROT>LAMA_MOUSE>S392>Lamin A SwissPROT>LAMC_MOUSE>S392>Lamins C and C2 SwissPROT>LMNA_MOUSE>S280>Isoform C2 of Prelamin-A/C OS=Mus musculus GN=Lmna IPI>P48678>S392>Prelamin-A/C IPI>P48678-2>S392>Isoform C of Prelamin-A/C IPI>P48678-3>S392>Isoform C…	R.LSPS*PTSQR.S	S392*	UNI:P48678	1.31567	0.026975	6.63453e+06	6.63453e+06	4244049	7958375	8130812	6204890	5.0427e+06	3135156	5695985	5711294	5628346	531.746	0.0451771	24.28	22.4677	0.832735	2	0		85700428	Lamin-A/C	P48678	LMNA_MOUSE	01035_4	375038	0.0451771	F	24.28	nucleus intermediate filament	spermatogenesis DNA repair DNA metabolic process G-protein coupled receptor protein signaling pathway mismatch repair	protein binding structural molecule activity	Hypertrophic cardiomyopathy (HCM) Arrhythmogenic right ventricular cardiomyopathy (ARVC) Dilated cardiomyopathy
1958840	Transformer-2 protein homolog beta	Manual Assigned Name:Transformer-2 protein homolog beta HPRD>04096_1>S260S262>TRA2A HPRD>04097_1>S264S266>Arginine/serine-rich splicing factor 10 SwissPROT>TRA2A_MOUSE>S259S261>Transformer-2 protein homolog alpha OS=Mus musculus GN=Tra2a IPI>P62996>S264S266>Transformer-2 protein homolog beta IPI>Q6PFR5>S264S266>Transformer-2 protein homolog alpha IPI>IPI00377298.2>S264S266>Tra2a transformer-2 pro…	R.RS*PS*PYYSR.Y	S264S266*	UNI:P62996	1.31344	0.0264414	1.99691e+06	1.99691e+06	1339971	2566297	2862047	1219344	1.52037e+06	957619	1803218	2239011	1081634	636.744	0.328492	39.24	46.7528	0.906147	2	0		51703331	Arginine/serine-rich splicing factor 10 (Transformer-2-beta) (HTRA2-beta) (Transformer 2 protein homolog) (Silica-induced protein 41)	P62996	TRA2A_MOUSE	04097_1	375886	0.150886	F	39.24	nucleus plasma membrane soluble fraction	mRNA processing angiogenesis protein amino acid dephosphorylation nuclear mRNA splicing, via spliceosome	nucleotide binding protein binding	Spliceosome
1960177	Serine/arginine repetitive matrix protein 2	Manual Assigned Name:Serine/arginine repetitive matrix protein 2 IPI>Q8BTI8>Serine/arginine repetitive matrix protein 2 IPI>Q8BTI8-2>Isoform 2 of Serine/arginine repetitive matrix protein 2 IPI>Q8BTI8-3>Isoform 3 of Serine/arginine repetitive matrix protein 2 IPI>IPI00225062.2>Srrm2 Isoform 3 of Serine/arginine repetitive matrix protein 2 IPI>IPI00785240.1>Srrm2 Isoform 1 of Serine/arginine repet…	R.S*RT*PPSAPSQSR.M	S2360T2362	UNI:Q8BTI8	1.31257	0.0264414	2.17533e+06	2.17533e+06	1126851	2600453	3030886	1943132	1.65731e+06	840232	1868402	2165836	1754766	477.532	0.686434	35.16	19.4326	0.810342	3	0		341942108	RecName: Full=Serine/arginine repetitive matrix protein 2	Q8BTI8	SRRM2_MOUSE		392144	0.686434	F	35.16	nucleus membrane	mRNA processing ER-associated protein catabolic process	protein binding
1958834	Glycylpeptide N-tetradecanoyltransferase 1	Manual Assigned Name:Glycylpeptide N-tetradecanoyltransferase 1 SwissPROT>NMT1_MOUSE>S47>Glycylpeptide N-tetradecanoyltransferase 1 OS=Mus musculus GN=Nmt1 IPI>O70310>S47>Glycylpeptide N-tetradecanoyltransferase 1 IPI>IPI00224128.7>S47>Nmt1 Glycylpeptide N-tetradecanoyltransferase 1 NCBI>6225769>S47>Glycylpeptide N-tetradecanoyltransferase 1 (Peptide N-myristoyltransferase 1) (Myristoyl-CoA:prote…	R.SGLS*PANDTGAK.K	S47*	UNI:O70310	1.31	0.0359367	2.02036e+06	2.02036e+06	1840478	2131605	2527859	1581482	1.54226e+06	1188531	1519252	1957541	1503715	603.268	0.150971	44.97	22.4784	0.613221	2	0		6225769	Glycylpeptide N-tetradecanoyltransferase 1 (Peptide N-myristoyltransferase 1) (Myristoyl-CoA:protein N-myristoyltransferase 1) (NMT 1) (Type I N-myristoyltransferase)	O70310	NMT1_MOUSE		394602	0.150971	F	44.97	cytoplasm	in utero embryonic development	transferase activity
1959082	Zinc finger CCCH domain-containing protein 18	Manual Assigned Name:Zinc finger CCCH domain-containing protein 18 HPRD>11232_1>S534>Conserved nuclear protein NHN1 IPI>Q0P678>S530>Zinc finger CCCH domain-containing protein 18 IPI>IPI00648513.1>S530>Zc3h18 Isoform 1 of Zinc finger CCCH domain-containing protein 18 IPI>IPI00673693.1>S530>Zc3h18 zinc finger CCCH domain-containing protein 18 isoform a IPI>G3X8T2>S530> NCBI>123785957>S530>Zinc fing…	K.LGVSVS*PSR.A	S530*	UNI:Q0P678	1.30931	0.0342506	1.11645e+07	1.11645e+07	11692780	13887784	10397657	8679709	8.52698e+06	8697556	10737566	6628535	8044273	491.242	0.114114	76.8	22.4115	0.956972	2	0		123785957	Zinc finger CCCH domain-containing protein 18 (Nuclear protein NHN1)	Q0P678	ZCH18_MOUSE	11232_1	394886	0.0692834	F	76.8	nucleus	cell communication regulation of transcription	zinc ion binding
1959591	Acin1 protein	Manual Assigned Name:Acin1 protein SwissPROT>ACINU_MOUSE>S798>Isoform 4 of Apoptotic chromatin condensation inducer in the nucleus OS=Mus musculus GN=Acin1 SwissPROT>B8JJ87_MOUSE>S838>Apoptotic chromatin condensation inducer 1 OS=Mus musculus GN=Acin1 SwissPROT>B8JJ88_MOUSE>S783>Apoptotic chromatin condensation inducer 1 (Fragment) OS=Mus musculus GN=Acin1 SwissPROT>B8JJ90_MOUSE>S147>Apoptotic ch…	K.GVQAGNS*DTEGGQPGR.K	S64	UNI:Q52KR6	1.30802	0.0404854	502581	502581	320803	608795	700987	379740	384229	224433	419049	509944	383492	810.338	0.529738	65.52	35.3857	0.859346	2	0		9622185	acinusL protein [Mus musculus]	Q52KR6	Q52KR6_MOUSE		372668	0.529738	F	65.52	nucleus nucleolus	apoptosis erythrocyte differentiation response to protein stimulus	nucleotide binding nucleic acid binding	Spliceosome
1959705	Polymerase I and transcript release factor	Manual Assigned Name:Polymerase I and transcript release factor SwissPROT>PTRF_MOUSE>S171>Polymerase I and transcript release factor OS=Mus musculus GN=Ptrf IPI>O54724>S171>Polymerase I and transcript release factor IPI>IPI00117689.1>S171>Ptrf Polymerase I and transcript release factor NCBI>56749456>S171>Polymerase I and transcript release factor [MASS=43953] NCBI>18140061>S171>polymerase I and t…	K.LPAKLSVS*K.S	S171*	UNI:O54724	1.30799	0.0417369	9.55645e+06	9.55645e+06	16649857	11251748	4811415	5512781	7.30622e+06	11050302	8820590	4043994	5309983	346.869	1.39805	26.56	19.4201	0.555444	3	0		56749456	Polymerase I and transcript release factor [MASS=43953]	O54724	PTRF_MOUSE		382871	1.39805	F	26.56	nucleus	regulation of transcription	protein binding
1959471	Glycogen [starch] synthase, muscle	Manual Assigned Name:Glycogen [starch] synthase, muscle SwissPROT>D3Z0Q6_MOUSE>T650>Uncharacterized protein OS=Mus musculus GN=Gys1 SwissPROT>GYS1_MOUSE>T714>"Glycogen [starch] synthase, muscle OS=Mus musculus GN=Gys1" SwissPROT>GYS3_MOUSE>T713>Glycogen [starch] synthase, brain (EC 2.4.1.11) IPI>Q9Z1E4>T714>Glycogen [starch] synthase, muscle IPI>IPI00652098.2>T714>Gys1 glycogen synthase 1, muscle…	R.SNSVDT*GPSSSLSTPTEPLSPTSSLGEER.N	T714*	UNI:Q9Z1E4	1.30756	0.0312601	4.51537e+06	4.51537e+06	3427539	6114927	6892374	1626633	3.45328e+06	1986603	4955938	5710183	1160398	1500.17	0.574127	21.43		0.168658	2	0		218512063	RecName: Full=Glycogen [starch] synthase, muscle	Q9Z1E4	GYS3_MOUSE		370159	0.574127	F	21.43	cytoplasm	heart development	protein binding	Starch and sucrose metabolism Insulin signaling pathway
1960447	Glycogen [starch] synthase, muscle	Manual Assigned Name:Glycogen [starch] synthase, muscle SwissPROT>D3Z0Q6_MOUSE>S655>Uncharacterized protein OS=Mus musculus GN=Gys1 SwissPROT>GYS1_MOUSE>S719>"Glycogen [starch] synthase, muscle OS=Mus musculus GN=Gys1" SwissPROT>GYS3_MOUSE>S718>Glycogen [starch] synthase, brain (EC 2.4.1.11) IPI>Q9Z1E4>S719>Glycogen [starch] synthase, muscle IPI>IPI00652098.2>S719>Gys1 glycogen synthase 1, muscle…	R.SNSVDTGPSSS*LSTPTEPLSPTSSLGEER.N	S719*	UNI:Q9Z1E4	1.30756	0.0312601	4.51537e+06	4.51537e+06	3427539	6114927	6892374	1626633	3.45328e+06	1986603	4955938	5710183	1160398	1500.17	0.574127	100.82		0.431661	2	0		218512063	RecName: Full=Glycogen [starch] synthase, muscle	Q9Z1E4	GYS3_MOUSE		370159	0.574127	F	100.82	cytoplasm	heart development	protein binding	Starch and sucrose metabolism Insulin signaling pathway
1959289	Novel protein (1200015F23Rik) (Fragment)	Manual Assigned Name:Novel protein (1200015F23Rik) (Fragment) SwissPROT>A3KGH5_MOUSE>S46>Novel protein (1200015F23Rik) (Fragment) OS=Mus musculus GN=Fam82a2 SwissPROT>A3KGH6_MOUSE>S46>Novel protein (1200015F23Rik) (Fragment) OS=Mus musculus GN=Fam82a2 SwissPROT>A3KGH7_MOUSE>S46>Novel protein (1200015F23Rik) (Fragment) OS=Mus musculus GN=Fam82a2 SwissPROT>RMD3_MOUSE>S46>Regulator of microtubule dy…	R.SHS*LPNSLDYAQASER.G	S46	UNI:A3KGH5	1.3072	0.0435299	1.34507e+07	1.34507e+07	6310656	14557726	13731710	19202633	1.02897e+07	4299701	12710388	7275722	16872937	932.908	0.934144	82.89	16.9024	0.957591	2	0		147643261	Protein FAM82C	A3KGH5	RMD3_MOUSE		379058	0.151222	F	82.89	integral to membrane Golgi apparatus	apoptosis protein folding	protein binding
1958612	Eukaryotic translation initiation factor 3 subunit G	Manual Assigned Name:Eukaryotic translation initiation factor 3 subunit G SwissPROT>EIF3G_MOUSE>T41>Eukaryotic translation initiation factor 3 subunit G OS=Mus musculus GN=Eif3g SwissPROT>IF34_MOUSE>T41>Eukaryotic translation initiation factor 3 subunit 4 (eIF-3 delta) (eIF3 p44) (eIF-3 RNA-binding subunit) (eIF3 p42) (Eif3p42) (eIF3g) IPI>Q9Z1D1>T41>Eukaryotic translation initiation factor 3 sub…	K.GIPLPTGDT*SPEPELLPGDPLPPPK.E	T41*	UNI:Q9Z1D1	1.3064	0.0246184	7.6628e+06	7.6628e+06	6963433	7882781	8142178		5.86558e+06	5190311	5843030	6563408		1307.66	0.205791	28.76	21.0377	0.514367	2	0		23503073	Eukaryotic translation initiation factor 3 subunit 4 (eIF-3 delta) (eIF3 p44) (eIF-3 RNA-binding subunit) (eIF3 p42) (Eif3p42) (eIF3g)	Q9Z1D1	IF34_MOUSE			0.205791	F	28.76	cytoplasm	translation	protein binding
1960102	Eukaryotic translation initiation factor 3 subunit G	Manual Assigned Name:Eukaryotic translation initiation factor 3 subunit G SwissPROT>EIF3G_MOUSE>S42>Eukaryotic translation initiation factor 3 subunit G OS=Mus musculus GN=Eif3g SwissPROT>IF34_MOUSE>S42>Eukaryotic translation initiation factor 3 subunit 4 (eIF-3 delta) (eIF3 p44) (eIF-3 RNA-binding subunit) (eIF3 p42) (Eif3p42) (eIF3g) IPI>Q9Z1D1>S42>Eukaryotic translation initiation factor 3 sub…	K.GIPLPTGDTS*PEPELLPGDPLPPPK.E	S42*	UNI:Q9Z1D1	1.3064	0.0246184	7.6628e+06	7.6628e+06	6963433	7882781	8142178		5.86558e+06	5190311	5843030	6563408		1311.66	0.000762684	22.5	7.59668	0.201686	2	0		23503073	Eukaryotic translation initiation factor 3 subunit 4 (eIF-3 delta) (eIF3 p44) (eIF-3 RNA-binding subunit) (eIF3 p42) (Eif3p42) (eIF3g)	Q9Z1D1	IF34_MOUSE			0.000762684	F	22.5	cytoplasm	translation	protein binding
1960012	Disintegrin and metalloproteinase domain-containing protein 17	Manual Assigned Name:Disintegrin and metalloproteinase domain-containing protein 17 HPRD>04703_1>S791>ADAM17 SwissPROT>B2RRI1_MOUSE>S794>Adam17 protein OS=Mus musculus GN=Adam17 SwissPROT>Q3UNK7_MOUSE>S813>Putative uncharacterized protein OS=Mus musculus GN=Adam17 IPI>Q9Z0F8>S794>Disintegrin and metalloproteinase domain-containing protein 17 IPI>IPI00381630.4>S794>Adam17 disintegrin and metallopr…	K.S*FEDLTDHPVTR.S	S794*	UNI:Q9Z0F8	1.30438	0.0434125	2.72738e+06	2.72738e+06	1425629	3337693	2654476	3491735	2.09094e+06	731773	2331461	2017890	3282640	748.825	1.09445	44.52	57.4824	0.96418	2	0		341940611	RecName: Full=Disintegrin and metalloproteinase domain-containing protein 17; Short=ADAM 17; AltName: Full=TNF-alpha convertase; AltName: Full=TNF-alpha-converting enzyme; AltName: CD_antigen=CD156b; Flags: Precursor	Q9Z0F8	Q3UNK7_MOUSE	04703_1	385169	1.09445	F	44.52	integral to membrane cytoplasm	proteolysis	protein binding zinc ion binding	Alzheimer's disease Epithelial cell signaling in Helicobacter pylori infection Notch signaling pathway
1959719	Bcl-2-associated transcription factor 1	Manual Assigned Name:Bcl-2-associated transcription factor 1 HPRD>16544_1>Y284S297>BCL2 associated transcription factor 1 HPRD>16544_2>Y282S295>BCL2 associated transcription factor 1 HPRD>16544_3>Y284S297>BCL2 associated transcription factor 1 SwissPROT>BCLF1_MOUSE>Y281S294>Isoform 3 of Bcl-2-associated transcription factor 1 OS=Mus musculus GN=Bclaf1 SwissPROT>Q3UR37_MOUSE>Y281S294>Putative unch…	R.Y*SPSQNSPIHHIPS*R.R	Y283S296*	UNI:Q8K019	1.30405	0.026975	1.98031e+07	1.98031e+07	12585799	31923361	26973561	7729499	1.51859e+07	10175186	24544677	19079662	6943894	470.703	0.100011	20.03	7.99961	0.866494	4	0		47605501	Bcl-2-associated transcription factor 1 (Btf) [MASS=106001]	Q8K019	Q3UR37_MOUSE	16544_3	379214	0.100011	F	20.03	nucleus membrane integral to membrane	regulation of transcription negative regulation of transcription	protein binding
1959335	Serine/arginine repetitive matrix protein 2	Manual Assigned Name:Serine/arginine repetitive matrix protein 2 SwissPROT>SRRM2_MOUSE>T955>Isoform 3 of Serine/arginine repetitive matrix protein 2 OS=Mus musculus GN=Srrm2 IPI>Q8BTI8>T955>Serine/arginine repetitive matrix protein 2 IPI>Q8BTI8-2>T955>Isoform 2 of Serine/arginine repetitive matrix protein 2 IPI>Q8BTI8-3>T955>Isoform 3 of Serine/arginine repetitive matrix protein 2 IPI>IPI00225062…	K.MELGT*PLR.H	T955	UNI:Q8BTI8	1.3036	0.0246184	6.32894e+06	6.32894e+06	9542737	8315417	4974750	2482867	4.85497e+06	7363218	6007993	3867486	2181194	498.733	0.720551	32.02	100	0.96673	2	0		341942108	RecName: Full=Serine/arginine repetitive matrix protein 2	Q8BTI8	SRRM2_MOUSE		392144	0.720551	F	32.02	nucleus	mRNA processing	protein binding
1959627	Tyrosine-protein kinase BAZ1B	Manual Assigned Name:Tyrosine-protein kinase BAZ1B HPRD>10416_1>S283>Bromodomain adjacent to zinc finger domain, 1B HPRD>10416_2>S283>Bromodomain adjacent to zinc finger domain, 1B HPRD>10416_3>S283>Bromodomain adjacent to zinc finger domain, 1B IPI>Q9Z277>S283>Tyrosine-protein kinase BAZ1B IPI>IPI00923656.1>S283>Baz1b Isoform 1 of Tyrosine-protein kinase BAZ1B IPI>IPI00130597.3>S283>Baz1b Bromod…	K.YS*LPSK.F	S283	UNI:Q9Z277	1.3033	0.0114398	886804	886804	869644	1160191	1148233	369148	680430	661050	933337	835448	291886	387.675	0.061988	23.39	16.9461	0.820924	2	0		239938603	RecName: Full=Tyrosine-protein kinase BAZ1B; AltName: Full=Bromodomain adjacent to zinc finger domain protein 1B; AltName: Full=Williams syndrome transcription factor homolog; AltName: Full=Williams-Beuren syndrome chromosomal region 9 protein homolog	Q9Z277	BAZ1B_MOUSE	10416_3	369983	0.061988	F	23.39	nucleus	regulation of transcription	protein binding	Nucleotide excision repair
1958692	Bcl-2-like protein 13	Manual Assigned Name:Bcl-2-like protein 13 SwissPROT>B2L13_MOUSE>S387>Bcl-2-like protein 13 OS=Mus musculus GN=Bcl2l13 SwissPROT>Q3TNR7_MOUSE>S387>Putative uncharacterized protein OS=Mus musculus GN=Bcl2l13 IPI>P59017>S387>Bcl-2-like protein 13 IPI>IPI00321499.1>S387>Bcl2l13 Bcl-2-like protein 13 IPI>IPI00606647.3>S387>Bcl2l13 bcl-2-like protein 13 NCBI>23396700>S387>BCL2-like protein 13 (Mil1 pr…	K.S*HTGEAAAVR.G	S387	UNI:P59017	1.30291	0.0396527	702541	702541	384889	1061042	786698	577535	539209	227877	1030657	471423	426879	539.738	0.350497	28.74	32.1748	0.724539	2	0		23396700	BCL2-like protein 13 (Mil1 protein) (Bcl-rambo)	P59017	Q3TNR7_MOUSE		370698	0.350497	F	28.74	integral to membrane	apoptosis	protein binding prolactin receptor activity
1958823	MCG123425, isoform CRA_e	Manual Assigned Name:MCG123425, isoform CRA_e HPRD>10139_1>S1834>Pecanex homolog HPRD>15579_1>S135>Tetratricopeptide repeat protein 14 HPRD>15579_2>S135>Tetratricopeptide repeat protein 14 SwissPROT>A6H6N9_MOUSE>S134>"MCG123425, isoform CRA_e OS=Mus musculus GN=Ttc14" SwissPROT>D3Z098_MOUSE>S165>Uncharacterized protein OS=Mus musculus GN=Ttc14 SwissPROT>D6REG1_MOUSE>S134>"MCG123425, isoform CRA_f…	R.ISS*IR.E	S134	UNI:A6H6N9	1.30004	0.00640298	5.34687e+06	5.34687e+06	5189758	7334881	6449797	2413029	4.11285e+06	4030315	5565550	5031823	1823718	333.166	0.619246	30.19	39.9127	0.590813	2	0		122066548	Tetratricopeptide repeat protein 14 (TPR repeat protein 14) [MASS=86792]	A6H6N9	TTC14_MOUSE	15579_2	374850	0.117236	F	30.19	integral to membrane cytoplasm membrane nucleus viral capsid	protein amino acid phosphorylation immune response regulation of transcription, DNA-dependent virion assembly cytoskeleton organization	protein binding binding RNA binding	Glycerolipid metabolism Glycine, serine and threonine metabolism Cysteine and methionine metabolism Lysine biosynthesis Pentose and glucuronate interconversions Pyruvate metabolism Propanoate metabolism Carbon fixation in photosynthetic organisms Pentose phosphate pathway Valine, leucine and isoleucine biosynthesis Fatty acid biosynthesis Porphyrin and chlorophyll metabolism Oxidative phosphoryla…
1958969	MCG127409	Manual Assigned Name:MCG127409 SwissPROT>D3YXK2_MOUSE>S345>Uncharacterized protein OS=Mus musculus GN=Safb SwissPROT>Q6A0C0_MOUSE>S425>MKIAA0138 protein (Fragment) OS=Mus musculus GN=Safb2 SwissPROT>SAFB2_MOUSE>S387>Scaffold attachment factor B2 OS=Mus musculus GN=Safb2 IPI>D3YXK2>S366>MCG127409 IPI>Q80YR5>S366>Scaffold attachment factor B2 IPI>IPI00857736.1>S366>Safb2 Scaffold attachment factor …	R.APTAALS*PEPQDSK.E	S366	UNI:D3YXK2	1.29925	0.0297721	2.00134e+07	2.00134e+07	17125714	21809794	26359205	14758834	1.54038e+07	12365251	16634843	18866818	13748206	746.339	0.819215	74.35	110.417	0.877325	2	0		38372440	Scaffold attachment factor B2 [MASS=111838]	D3YXK2	SAFB2_MOUSE		377552	0.410278	F	74.35	nucleus	regulation of transcription inflammatory response	DNA binding nucleotide binding
1959433	Bcl-2-associated transcription factor 1	Manual Assigned Name:Bcl-2-associated transcription factor 1 SwissPROT>BCLF1_MOUSE>S654>Isoform 3 of Bcl-2-associated transcription factor 1 OS=Mus musculus GN=Bclaf1 SwissPROT>Q3UR37_MOUSE>S654>Putative uncharacterized protein (Fragment) OS=Mus musculus GN=Bclaf1 IPI>Q8K019>S656>Bcl-2-associated transcription factor 1 IPI>Q8K019-2>S656>Isoform 2 of Bcl-2-associated transcription factor 1 IPI>Q8K…	R.IDIS*PSALR.K	S656*	UNI:Q8K019	1.29828	0.0342506	5.66904e+07	5.66904e+07	67234539	89795348	52627799	17104007	4.36657e+07	51161867	67148312	39779286	16573470	526.263	0.150259	56.49	22.6067	0.830244	2	0		47605501	Bcl-2-associated transcription factor 1 (Btf) [MASS=106001]	Q8K019	Q3UR37_MOUSE		379214	0.150259	F	56.49	nucleus membrane integral to membrane	regulation of transcription negative regulation of transcription	protein binding
1958725	Serine/arginine repetitive matrix 1	Manual Assigned Name:Serine/arginine repetitive matrix 1 HPRD>10441_1>S616>Serine arginine repetitive matrix protein 1 SwissPROT>A2A8V8_MOUSE>S621>Serine/arginine repetitive matrix 1 OS=Mus musculus GN=Srrm1 SwissPROT>A2A8V9_MOUSE>S630>Serine/arginine repetitive matrix 1 OS=Mus musculus GN=Srrm1 SwissPROT>A2A8W1_MOUSE>S80>Serine/arginine repetitive matrix 1 (Fragment) OS=Mus musculus GN=Srrm1 Swi…	R.TAS*PPPPPKR.R	S621*	UNI:A2A8V8	1.29707	0.0285086	1.12012e+06	1.12012e+06	764371	1139716	1231255	1345148	863582	668087	854061	819685	1112494	382.532	0.901725	33.14	45.0249	0.881507	3	0		347595715	RecName: Full=Serine/arginine repetitive matrix protein 1; AltName: Full=Plenty-of-prolines 101	A2A8V8	SRRM1_MOUSE	10441_1	375402	0.744599	F	33.14	nucleus spliceosomal complex	mRNA processing	DNA binding protein binding lysophospholipase activity zinc ion binding
1958846	Heat shock protein 84b	Manual Assigned Name:Heat shock protein 84b HPRD>06763_1>S255>HSP90B HPRD>11811_1>S218>Heat shock protein HSP 90 beta SwissPROT>HS90B_MOUSE>S255>Heat shock protein HSP 90-beta OS=Mus musculus GN=Hsp90ab1 SwissPROT>Q71LX8_MOUSE>S255>Heat shock protein 84b OS=Mus musculus GN=Hsp90ab1 IPI>Q71LX8>S255>Heat shock protein 84b IPI>P11499>S255>Heat shock protein HSP 90-beta IPI>IPI00554929.2>S255>Hsp90ab…	K.IEDVGS*DEEDDSGK.D	S255*	UNI:Q71LX8	1.29453	0.0326563	8.82987e+07	8.82987e+07	66755204	101721113	127692703	57025706	6.82091e+07	48635297	73932317	95999070	54269534	791.798	0.207255	65.11	71.755	0.920184	2	0		123681	Heat shock protein HSP 90-beta (HSP 84) (Tumor specific transplantation 84 kDa antigen) (TSTA)	Q71LX8	Q71LX8_MOUSE	11811_1	373204	0.0265388	F	65.11	cytoplasm	protein folding	protein binding ATP binding	Pathways in cancer Plant-pathogen interaction Progesterone-mediated oocyte maturation Prostate cancer Antigen processing and presentation NOD-like receptor signaling pathway
1959778	Perilipin-1	Manual Assigned Name:Perilipin-1 SwissPROT>PLIN_MOUSE>S222>Perilipin (PERI) (Lipid droplet-associated protein) IPI>Q8CGN5>S222>Perilipin-1 IPI>Q8CGN5-2>S222>Isoform 2 of Perilipin-1 IPI>Q8CGN5-3>S222>Isoform 3 of Perilipin-1 IPI>IPI00387480.1>S222>Plin Perilipin IPI>IPI00223783.2>S222>Plin1 Isoform 1 of Perilipin-1 IPI>IPI00947605.1>S222>Plin1 Isoform 2 of Perilipin-1 IPI>IPI00947617.1>S222>Plin1…	R.RVS*TLANTLSR.H	S222	UNI:Q8CGN5	1.29448	0.0453992	6.26547e+06	6.26547e+06	6596925	6899381	7094892	4470698	4.84014e+06	3913340	6384411	5079215	3983597	649.335	0.0631906	40.19	16.9461	0.717474	2	0		261260072	RecName: Full=Perilipin-1; AltName: Full=Lipid droplet-associated protein; AltName: Full=Perilipin A	Q8CGN5	PLIN_MOUSE		390074	0.0631906	F	40.19	lipid particle	lipid metabolic process	protein binding	PPAR signaling pathway
1958889	Sntb2 protein	Manual Assigned Name:Sntb2 protein SwissPROT>B7ZNU9_MOUSE>S90>Sntb2 protein OS=Mus musculus GN=Sntb2 SwissPROT>SNTB2_MOUSE>S90>Beta-2-syntrophin OS=Mus musculus GN=Sntb2 IPI>B7ZNU9>S90>Sntb2 protein IPI>Q61235>S90>Beta-2-syntrophin IPI>IPI00118895.1>S90>Sntb2 Beta-2-syntrophin IPI>IPI00922961.1>S90>- Sntb2 protein IPI>IPI00849318.1>S90>LOC100047790 similar to beta-2-syntrophin NCBI>23822163>S90>B…	R.GPAGEASAS*PPVR.R	S90*	UNI:B7ZNU9	1.29034	0.0385491	9.01017e+06	9.01017e+06	7577751	10679812	12350328	5432802	6.98277e+06	5624795	7667633	9251197	5387472	638.29	0.260275	43.35	19.8227	0.625691	2	0		23822163	Beta-2-syntrophin (59 kDa dystrophin-associated protein A1, basic component 2) (Syntrophin 3) (SNT3) (Syntrophin-like) (SNTL)	B7ZNU9	SNTB2_MOUSE		377669	0.123866	F	43.35	membrane synapse	neuromuscular junction development fatty acid metabolic process	protein binding
1959508	Elongation factor 1-beta	Manual Assigned Name:Elongation factor 1-beta HPRD>02804_1>S106>Eukaryotic translation elongation factor 1 beta 2 HPRD>02804_2>S106>Eukaryotic translation elongation factor 1 beta 2 HPRD>02804_3>S106>Eukaryotic translation elongation factor 1 beta 2 HPRD>19235_1>S106>HCG1983058 SwissPROT>EF1B_MOUSE>S106>Elongation factor 1-beta OS=Mus musculus GN=Eef1b IPI>O70251>S106>Elongation factor 1-beta IPI…	K.DDDDIDLFGS*DDEEESEEAK.K	S106*	UNI:O70251	1.28846	0.0246184	5.48436e+07	5.48436e+07	41663212	89444377	78204870	10061780	4.25652e+07	31174539	68316380	61826144	8943669	1180.93	0.106741	63.71	83.4708	0.957478	2	0		46397804	Elongation factor 1-beta (EF-1-beta)	O70251	EF1B_MOUSE	19235_1	374066	0.00508291	F	63.71	eukaryotic translation elongation factor 1 complex cytosol	translation	protein binding
1959319	Aladin	Manual Assigned Name:Aladin HPRD>05646_1>S495>Aladin SwissPROT>AAAS_MOUSE>S495>Aladin OS=Mus musculus GN=Aaas IPI>P58742>S495>Aladin IPI>IPI00311509.1>S495>Aaas Aladin NCBI>20137304>S495>Aladin (Adracalin) NCBI>241982696>S495>achalasia, adrenocortical insufficiency, alacrimia [Mus musculus] NCBI>148672040>S498>achalasia, adrenocortical insufficiency, alacrimia [Mus musculus] [MASS=59785] NCBI>742…	R.FS*PVLGR.A	S495	UNI:P58742	1.28846	0.0246184	9.37913e+06	9.37913e+06	10490388	9995953	7630658	9399538	7.27934e+06	8022796	7014356	5789297	8290923	433.214	0.63784	27.24	100	0.767811	2	0		20137304	Aladin (Adracalin)	P58742	AAAS_MOUSE	05646_1	379467	0.494557	F	27.24	nuclear pore	learning	hydrolase activity molecular_function	Nitrogen metabolism
1958807	Transformer-2 protein homolog beta	Manual Assigned Name:Transformer-2 protein homolog beta HPRD>04096_1>S260Y264>TRA2A HPRD>04097_1>S264Y268>Arginine/serine-rich splicing factor 10 SwissPROT>TRA2A_MOUSE>S259Y263>Transformer-2 protein homolog alpha OS=Mus musculus GN=Tra2a IPI>P62996>S264Y268>Transformer-2 protein homolog beta IPI>Q6PFR5>S264Y268>Transformer-2 protein homolog alpha IPI>IPI00377298.2>S264Y268>Tra2a transformer-2 pro…	R.RRS*PSPY*YSR.Y	S264Y268*	UNI:P62996	1.28833	0.0303445	1.86532e+06	1.86532e+06	1758869	2030947	1617886	2053589	1.44786e+06	1233119	1516868	1134579	1906872	714.794	0.498397	25.05	23.9867	0.499351	2	0		51703331	Arginine/serine-rich splicing factor 10 (Transformer-2-beta) (HTRA2-beta) (Transformer 2 protein homolog) (Silica-induced protein 41)	P62996	TRA2A_MOUSE	04097_1	375886	0.498397	F	25.05	nucleus plasma membrane soluble fraction	mRNA processing angiogenesis protein amino acid dephosphorylation nuclear mRNA splicing, via spliceosome	nucleotide binding protein binding	Spliceosome
1959772	Kinesin light chain 2	Manual Assigned Name:Kinesin light chain 2 HPRD>13917_1>S610>FLJ12387 SwissPROT>D3YXZ3_MOUSE>S605>Uncharacterized protein OS=Mus musculus GN=Klc2 SwissPROT>Q91YS4_MOUSE>S607>Kinesin light chain 2 OS=Mus musculus GN=Klc2 IPI>Q91YS4>S607>Kinesin light chain 2 IPI>IPI00753928.1>S607>Klc2 kinesin light chain 2 IPI>D3YXZ3>S607>Uncharacterized protein IPI>IPI00757585.1>S607>Klc2 Uncharacterized protein…	R.TLSSS*SMDLSR.R	S607*	UNI:Q91YS4	1.28416	0.0424113	5.33311e+06	5.33311e+06	3265832	5847969	6205257	6013381	4.153e+06	2255889	3963409	4234351	6158351	632.268	0.750279	24.84	10.7918	0.918428	2	0		148701159	kinesin light chain 2 [Mus musculus] [MASS=68419]	Q91YS4	Q91YS4_MOUSE	13917_1	373614	0.750279	F	24.84	cytoplasm kinesin complex	axon cargo transport regulation of ARF GTPase activity	protein binding binding
1958620	ATP-binding cassette sub-family F member 1	Manual Assigned Name:ATP-binding cassette sub-family F member 1 SwissPROT>ABCF1_MOUSE>S138>ATP-binding cassette sub-family F member 1 OS=Mus musculus GN=Abcf1 SwissPROT>Q5RL55_MOUSE>S138>"ATP-binding cassette, sub-family F (GCN20), member 1 OS=Mus musculus GN=Abcf1" IPI>Q6P542>S138>ATP-binding cassette sub-family F member 1 IPI>IPI00396671.1>S138>Abcf1 ATP-binding cassette sub-family F member 1 I…	K.GGNVFEALIQDDS*EEEEEEEENR.V	S138*	UNI:Q6P542	1.28382	0.0396527	1.87004e+07	1.87004e+07	10722457	34187366	29847075	44823	1.45663e+07	8281110	25183088	24779464	21480	916.367	1.13102	29.28	100	0.889202	3	0		56417892	ATP-binding cassette, sub-family F, member 1 [MASS=94945]	Q6P542	Q5RL55_MOUSE		377554	0.000364022	F	29.28	ribosome	transport metabolic process	ATP binding
1959637	Nuclease-sensitive element-binding protein 1	Manual Assigned Name:Nuclease-sensitive element-binding protein 1 HPRD>01095_1>YB-1 SwissPROT>A2BGG7_MOUSE>Y box protein 1 (Fragment) OS=Mus musculus GN=Ybx1 SwissPROT>YBOX1_MOUSE>Nuclease-sensitive element-binding protein 1 OS=Mus musculus GN=Ybx1 IPI>P62960>Nuclease-sensitive element-binding protein 1 IPI>IPI00120886.3>Ybx1 Nuclease-sensitive element-binding protein 1 IPI>IPI00647981.3>Ybx1 Y b…	R.NYQQNYQNS*ESGEKNEGSESAPEGQAQQR.R	S163*	UNI:P62960	1.28293	0.043168	6.56446e+06	6.56446e+06	2144306	9137091	7148669	7827790	5.11677e+06	1540230	6092373	4820692	8013783	839.602	0.00894085	24.1		0.829556	4	0		51704189	Nuclease sensitive element binding protein 1 (Y box binding protein-1) (Y-box transcription factor) (YB-1) (CCAAT-binding transcription factor I subunit A) (CBF-A) (Enhancer factor I subunit A) (EFI-A) (DNA-binding protein B) (DBPB)	P62960	YBOX1_MOUSE	1095	388522	0.00894085	F	24.1	nucleus proteasome core complex	regulation of transcription, DNA-dependent	protein binding DNA binding
1959580	High mobility group protein HMGI-C	Manual Assigned Name:High mobility group protein HMGI-C SwissPROT>HMGA2_MOUSE>S101S104>High mobility group protein HMGI-C OS=Mus musculus GN=Hmga2 SwissPROT>HMGIC_MOUSE>S101S104>High mobility group protein HMGI-C (High mobility group AT-hook 2) IPI>P52927>S101S104>High mobility group protein HMGI-C IPI>IPI00331612.3>S101S104>Hmga2 High mobility group protein HMGI-C NCBI>1708264>S101S104>High mobi…	K.KPAQETEETSS*QES*AEED.-	S101S104	UNI:P52927	1.28034	0.0246184	5.20882e+06	5.20882e+06	1755114	6444212	6128404	6507537	4.0683e+06	1306393	4615004	5445113	4906694	721.597	0.269561	33.92	19.1582	0.908178	3	0		1708264	High mobility group protein HMGI-C (High mobility group AT-hook 2)	P52927	HMGIC_MOUSE			0.239507	F	33.92	nucleus	regulation of transcription, DNA-dependent	protein binding
1959864	High mobility group protein HMGI-C	Manual Assigned Name:High mobility group protein HMGI-C SwissPROT>HMGA2_MOUSE>S100S104>High mobility group protein HMGI-C OS=Mus musculus GN=Hmga2 SwissPROT>HMGIC_MOUSE>S100S104>High mobility group protein HMGI-C (High mobility group AT-hook 2) IPI>P52927>S100S104>High mobility group protein HMGI-C IPI>IPI00331612.3>S100S104>Hmga2 High mobility group protein HMGI-C NCBI>1708264>S100S104>High mobi…	K.KPAQETEETS*SQES*AEED.-	S100S104	UNI:P52927	1.28034	0.0246184	5.20882e+06	5.20882e+06	1755114	6444212	6128404	6507537	4.0683e+06	1306393	4615004	5445113	4906694	721.596	1.53599	23.13	16.2993	0.916471	3	0		1708264	High mobility group protein HMGI-C (High mobility group AT-hook 2)	P52927	HMGIC_MOUSE			1.53599	F	23.13	nucleus	regulation of transcription, DNA-dependent	protein binding
1960188	Serrate RNA effector molecule homolog	Manual Assigned Name:Serrate RNA effector molecule homolog HPRD>10665_1>S74>Arsenite resistance protein 2 SwissPROT>ARS2_MOUSE>S74>Arsenite-resistance protein 2 SwissPROT>SRRT_MOUSE>S74>Isoform D of Serrate RNA effector molecule homolog OS=Mus musculus GN=Srrt IPI>Q99MR6>S74>Serrate RNA effector molecule homolog IPI>Q99MR6-2>S74>Isoform B of Serrate RNA effector molecule homolog IPI>Q99MR6-3>S74>…	R.HELS*PPQKR.M	S74*	UNI:Q99MR6	1.27669	0.0449745	6.64874e+06	6.64874e+06	11546813	5480513	4881441	4686186	5.20781e+06	8627269	3997674	3346497	4859787	397.199	0.54725	28.95	100	0.898259	3	0		20137436	Arsenite-resistance protein 2	Q99MR6	SRRT_MOUSE	10665_1	379108	0.0100876	F	28.95	cytoplasm	cell proliferation	protein binding
1958910	Pinin	Manual Assigned Name:Pinin SwissPROT>PININ_MOUSE>S346>Pinin OS=Mus musculus GN=Pnn SwissPROT>Q3TUQ5_MOUSE>S347>Pinin OS=Mus musculus GN=Pnn IPI>O35691>S346>Pinin IPI>Q3TUQ5>S346>Pinin IPI>IPI00317891.7>S346>Pnn Pinin IPI>IPI00785231.1>S346>Pnn pinin NCBI>73921751>S346>Pinin [MASS=82435] NCBI>187952777>S347>Pinin [Mus musculus] [MASS=82504] NCBI>124376796>S347>Pinin [Mus musculus] NCBI>27461725>S3…	K.EAGIVHS*DAEKEQEEEEQK.Q	S346*	UNI:O35691	1.27534	0.0246184	2.19521e+06	2.19521e+06	1655350	2350127	3683882	1091492	1.72128e+06	1185328	1652044	3263512	784223	760.998	1.6094	37.03	100	0.244301	3	0		73921751	Pinin [MASS=82435]	O35691	Q3TUQ5_MOUSE		372133	1.6094	F	37.03	nucleus cytoplasm	regulation of transcription neurotransmitter secretion	protein binding
1958791	Heat shock protein 84b	Manual Assigned Name:Heat shock protein 84b HPRD>06763_1>S226>HSP90B SwissPROT>HS90B_MOUSE>S226>Heat shock protein HSP 90-beta OS=Mus musculus GN=Hsp90ab1 SwissPROT>Q71LX8_MOUSE>S226>Heat shock protein 84b OS=Mus musculus GN=Hsp90ab1 IPI>Q71LX8>S226>Heat shock protein 84b IPI>P11499>S226>Heat shock protein HSP 90-beta IPI>IPI00554929.2>S226>Hsp90ab1 Heat shock protein HSP 90-beta IPI>IPI00229080.…	R.EKEIS*DDEAEEEK.G	S226*	UNI:Q71LX8	1.27495	0.0201463	1.5234e+06	1.5234e+06	1234018	2015902	2755860	87802	1.19486e+06	891286	1617056	2209180	61927	815.822	0.0539666	74.94	100	0.894916	2	0		123681	Heat shock protein HSP 90-beta (HSP 84) (Tumor specific transplantation 84 kDa antigen) (TSTA)	Q71LX8	Q71LX8_MOUSE	06763_1	373204	0.0539666	F	74.94	cytoplasm	protein folding	protein binding	Pathways in cancer Plant-pathogen interaction Progesterone-mediated oocyte maturation Prostate cancer Antigen processing and presentation NOD-like receptor signaling pathway
1959188	SAM and SH3 domain-containing protein 1	Manual Assigned Name:SAM and SH3 domain-containing protein 1 SwissPROT>SASH1_MOUSE>S831>SAM and SH3 domain-containing protein 1 OS=Mus musculus GN=Sash1 IPI>P59808>S831>SAM and SH3 domain-containing protein 1 IPI>IPI00338954.3>S831>Sash1 SAM and SH3 domain-containing protein 1 IPI>F8VQK5>S831>Uncharacterized protein NCBI>34098397>S831>SAM and SH3 domains containing protein 1 NCBI>148671587>S348>m…	R.SHS*LDDLQGDADVGK.N	S831	UNI:P59808	1.27416	0.0435299	9.11029e+06	9.11029e+06	7510153	10321068	10526374	8083584	7.15007e+06	5428125	7589943	7282021	8300172	546.233	0.254783	53.74	1.49635	0.904828	3	0		34098397	SAM and SH3 domains containing protein 1	P59808	SASH1_MOUSE		371036	0.254783	F	53.74	centrosome	cell cycle	protein binding
1959747	SAM and SH3 domain-containing protein 1	Manual Assigned Name:SAM and SH3 domain-containing protein 1 SwissPROT>SASH1_MOUSE>S829>SAM and SH3 domain-containing protein 1 OS=Mus musculus GN=Sash1 IPI>P59808>S829>SAM and SH3 domain-containing protein 1 IPI>IPI00338954.3>S829>Sash1 SAM and SH3 domain-containing protein 1 IPI>F8VQK5>S829>Uncharacterized protein NCBI>34098397>S829>SAM and SH3 domains containing protein 1 NCBI>148671587>S346>m…	R.S*HSLDDLQGDADVGK.N	S829	UNI:P59808	1.27416	0.0435299	9.11029e+06	9.11029e+06	7510153	10321068	10526374	8083584	7.15007e+06	5428125	7589943	7282021	8300172	546.234	0.927484	25.3	15.0014	0.793523	3	0		34098397	SAM and SH3 domains containing protein 1	P59808	SASH1_MOUSE		371036	0.927484	F	25.3	centrosome	cell cycle	protein binding
1959234	Serine/arginine repetitive matrix protein 2	Manual Assigned Name:Serine/arginine repetitive matrix protein 2 SwissPROT>SRRM2_MOUSE>S1360>Isoform 3 of Serine/arginine repetitive matrix protein 2 OS=Mus musculus GN=Srrm2 IPI>Q8BTI8>S1360>Serine/arginine repetitive matrix protein 2 IPI>Q8BTI8-2>S1360>Isoform 2 of Serine/arginine repetitive matrix protein 2 IPI>Q8BTI8-3>S1360>Isoform 3 of Serine/arginine repetitive matrix protein 2 IPI>IPI0022…	K.VSS*PVLETVQQR.T	S1360	UNI:Q8BTI8	1.27357	0.0246184	5.16086e+07	5.16086e+07	59451799	58241697	51178807	37562199	4.05227e+07	45149073	42881526	40319517	33740861	716.857	0.0153555	50.04	13.6248	0.968902	2	0		341942108	RecName: Full=Serine/arginine repetitive matrix protein 2	Q8BTI8	SRRM2_MOUSE		392144	0.0153555	F	50.04	nucleus	mRNA processing	protein binding
1959831	ATP-binding cassette sub-family F member 1	Manual Assigned Name:ATP-binding cassette sub-family F member 1 SwissPROT>ABCF1_MOUSE>S107>ATP-binding cassette sub-family F member 1 OS=Mus musculus GN=Abcf1 SwissPROT>Q5RL55_MOUSE>S107>"ATP-binding cassette, sub-family F (GCN20), member 1 OS=Mus musculus GN=Abcf1" IPI>Q6P542>S107>ATP-binding cassette sub-family F member 1 IPI>IPI00396671.1>S107>Abcf1 ATP-binding cassette sub-family F member 1 I…	K.QLSVPAS*DEEDEVPAPIPR.G	S107*	UNI:Q6P542	1.27282	0.0366099	2.65516e+07	2.65516e+07	24976313	30420894	27107317	23701733	2.08604e+07	17550395	22931515	19718487	23241229	1064.99	0.224521	50.1	19.3323	0.739174	2	0		56417892	ATP-binding cassette, sub-family F, member 1 [MASS=94945]	Q6P542	Q5RL55_MOUSE		377554	0.224521	F	50.1	ribosome	transport metabolic process	ATP binding
1959861	Serine/arginine-rich splicing factor 2	Manual Assigned Name:Serine/arginine-rich splicing factor 2 HPRD>02888_1>S189S191>Splicing factor, arginine/serine rich 2 SwissPROT>Q8C671_MOUSE>S188S190>Putative uncharacterized protein OS=Mus musculus GN=Srsf2 SwissPROT>SFR10_MOUSE>S242S244>Splicing factor, arginine/serine-rich 10 (Putative myelin regulatory factor 1) (MRF-1) (Fragment) SwissPROT>SFRS2_MOUSE>S188S190>Splicing factor, arginine/s…	R.S*RS*PPPVSK.R	S189S191*	UNI:Q62093	1.26847	0.0297234	4.82045e+06	4.82045e+06	2134788	6293489	6701252	4152289	3.80022e+06	1648576	4687777	4966129	3898382	566.749	0.717003	20.87	82.7555	0.21209	2	0		18280933	Splicing factor, arginine/serine-rich 2 (Splicing factor SC35) (SC-35) (Splicing component, 35 kDa) (PR264 protein)	Q62093	SRSF2_MOUSE	02888_1		0.717003	F	20.87	nucleus cytoplasm mitochondrion	mRNA processing translation signal transduction skeletal muscle fiber development	protein binding nucleotide binding	Spliceosome
1958688	Serine/arginine repetitive matrix 1	Manual Assigned Name:Serine/arginine repetitive matrix 1 HPRD>10441_1>S450>Serine arginine repetitive matrix protein 1 SwissPROT>A2A8V8_MOUSE>S448>Serine/arginine repetitive matrix 1 OS=Mus musculus GN=Srrm1 SwissPROT>A2A8V9_MOUSE>S443>Serine/arginine repetitive matrix 1 OS=Mus musculus GN=Srrm1 SwissPROT>SRRM1_MOUSE>S448>Isoform 2 of Serine/arginine repetitive matrix protein 1 OS=Mus musculus GN…	K.RES*PSPAPKPR.K	S448	UNI:A2A8V8	1.26782	0.0440881	1.16395e+06	1.16395e+06	1328830	991447	674766	1660748	918066	897661	620094	603936	1550574	434.551	0.643036	27.25	8.31129	0.665748	3	0		347595715	RecName: Full=Serine/arginine repetitive matrix protein 1; AltName: Full=Plenty-of-prolines 101	A2A8V8	SRRM1_MOUSE	10441_1	375402	0.643036	F	27.25	nucleus spliceosomal complex	mRNA processing	DNA binding protein binding lysophospholipase activity zinc ion binding
1960184	Pinin	Manual Assigned Name:Pinin HPRD>04401_1>S99>Pinin HPRD>04401_2>S100>Pinin SwissPROT>PININ_MOUSE>S100>Pinin OS=Mus musculus GN=Pnn SwissPROT>Q3TUQ5_MOUSE>S100>Pinin OS=Mus musculus GN=Pnn IPI>O35691>S100>Pinin IPI>Q3TUQ5>S100>Pinin IPI>IPI00317891.7>S100>Pnn Pinin IPI>IPI00785231.1>S100>Pnn pinin NCBI>73921751>S100>Pinin [MASS=82435] NCBI>187952777>S100>Pinin [Mus musculus] [MASS=82504] NCBI>12437…	R.QES*DPEDDDVK.K	S100*	UNI:O35691	1.26741	0.0474478	307366	307366	325999	333467	481822	88175	242515	177106	296038	444767	52150	678.745	1.03356	33.68	100	0.93214	2	0		73921751	Pinin [MASS=82435]	O35691	Q3TUQ5_MOUSE	04401_2	372133	1.03356	F	33.68	nucleus cytoplasm	regulation of transcription neurotransmitter secretion	protein binding
1960011	Nuclear ubiquitous casein and cyclin-dependent kinases substrate	Manual Assigned Name:Nuclear ubiquitous casein and cyclin-dependent kinases substrate HPRD>11406_1>S19>Nuclear ubiquitous casein kinase and cyclin dependent kinase substrate SwissPROT>NUCKS_MOUSE>S19>Nuclear ubiquitous casein and cyclin-dependent kinases substrate OS=Mus musculus GN=Nucks1 IPI>Q80XU3>S19>Nuclear ubiquitous casein and cyclin-dependent kinases substrate IPI>IPI00341869.5>S19>Nucks1…	R.KVVDYSQFQES*DDADEDYGR.D	S19*	UNI:Q80XU3	1.2674	0.0230352	3.49839e+07	3.49839e+07	11329079	34160272	26634667	67811742	2.76029e+07	9387055	24522876	20274888	56226680	815.997	1.89577	50.66	42.904	0.985746	3	0		50400986	Nuclear ubiquitous casein and cyclin-dependent kinases substrate (JC7)	Q80XU3	NUCKS_MOUSE	11406_1	383895	1.89577	F	50.66	nucleus integral to membrane	in utero embryonic development regulation of cell cycle protein folding	metal ion binding double-stranded DNA binding kinase activity
1959362	Heterogeneous nuclear ribonucleoproteins C1/C2	Manual Assigned Name:Heterogeneous nuclear ribonucleoproteins C1/C2 SwissPROT>HNRPC_MOUSE>S261>Isoform 5 of Heterogeneous nuclear ribonucleoproteins C1/C2 OS=Mus musculus GN=Hnrnpc SwissPROT>Q3U6P5_MOUSE>S268>Putative uncharacterized protein OS=Mus musculus GN=Hnrnpc IPI>Q9Z204>S268>Heterogeneous nuclear ribonucleoproteins C1/C2 IPI>Q9Z204-3>S268>Isoform 3 of Heterogeneous nuclear ribonucleoprote…	K.MESEAGADDS*AEEGDLLDDDDNEDR.G	S268*	UNI:Q9Z204	1.26617	0.0105956	1.7261e+07	1.7261e+07	7871894	24904158	30593878	5673973	1.36325e+07	6394651	19462964	24453485	4218838	1402	1.09597	94.1	20.4063	0.912672	2	0		20455216	Heterogeneous nuclear ribonucleoproteins C1/C2 (hnRNP C1 / hnRNP C2)	Q9Z204	Q3U6P5_MOUSE		387360	0.209776	F	94.1	nucleus ribonucleoprotein complex	mRNA processing metabolic process female pregnancy	protein binding nucleotide binding	Spliceosome
1959799	Heterogeneous nuclear ribonucleoproteins C1/C2	Manual Assigned Name:Heterogeneous nuclear ribonucleoproteins C1/C2 SwissPROT>HNRPC_MOUSE>S254>Isoform 5 of Heterogeneous nuclear ribonucleoproteins C1/C2 OS=Mus musculus GN=Hnrnpc SwissPROT>Q3U6P5_MOUSE>S261>Putative uncharacterized protein OS=Mus musculus GN=Hnrnpc IPI>Q9Z204>S261>Heterogeneous nuclear ribonucleoproteins C1/C2 IPI>Q9Z204-3>S261>Isoform 3 of Heterogeneous nuclear ribonucleoprote…	K.MES*EAGADDSAEEGDLLDDDDNEDR.G	S261*	UNI:Q9Z204	1.26617	0.0105956	1.7261e+07	1.7261e+07	7871894	24904158	30593878	5673973	1.36325e+07	6394651	19462964	24453485	4218838	1397	0.237023	28.93	7.53501	0.061866	2	0		20455216	Heterogeneous nuclear ribonucleoproteins C1/C2 (hnRNP C1 / hnRNP C2)	Q9Z204	Q3U6P5_MOUSE		387360	0.237023	F	28.93	nucleus ribonucleoprotein complex	mRNA processing metabolic process female pregnancy	protein binding nucleotide binding	Spliceosome
1958883	Melanoma inhibitory activity protein 3	Manual Assigned Name:Melanoma inhibitory activity protein 3 SwissPROT>MIA3_MOUSE>S617>Isoform 3 of Melanoma inhibitory activity protein 3 OS=Mus musculus GN=Mia3 IPI>Q8BI84>S1766>Melanoma inhibitory activity protein 3 IPI>Q8BI84-3>S1766>Isoform 3 of Melanoma inhibitory activity protein 3 IPI>IPI00222037.3>S1766>Mia3 Isoform 1 of Melanoma inhibitory activity protein 3 IPI>IPI00850156.1>S1766>Mia3 …	K.HSASDPGPAPVVNSSS*R.S	S1766	UNI:Q8BI84	1.26568	0.0342506	4.87088e+06	4.87088e+06	3687555	4313449	4240040	7242474	3.84843e+06	2601571	4129236	3301912	5361021	585.596	0.733997	29.61	13.9794	0.776411	3	0		152040391	Melanoma inhibitory activity protein 3 precursor (Protein TANGO) [MASS=213673]	Q8BI84	MIA3_MOUSE		385819	0.733997	F	29.61	integral to membrane	transport	protein binding
1959905	Melanoma inhibitory activity protein 3	Manual Assigned Name:Melanoma inhibitory activity protein 3 SwissPROT>MIA3_MOUSE>S616>Isoform 3 of Melanoma inhibitory activity protein 3 OS=Mus musculus GN=Mia3 IPI>Q8BI84>S1765>Melanoma inhibitory activity protein 3 IPI>Q8BI84-3>S1765>Isoform 3 of Melanoma inhibitory activity protein 3 IPI>IPI00222037.3>S1765>Mia3 Isoform 1 of Melanoma inhibitory activity protein 3 IPI>IPI00850156.1>S1765>Mia3 …	K.HSASDPGPAPVVNSS*SR.S	S1765	UNI:Q8BI84	1.26568	0.0342506	4.87088e+06	4.87088e+06	3687555	4313449	4240040	7242474	3.84843e+06	2601571	4129236	3301912	5361021	585.596	0.411449	35.01		0.793085	3	0		152040391	Melanoma inhibitory activity protein 3 precursor (Protein TANGO) [MASS=213673]	Q8BI84	MIA3_MOUSE		385819	0.411449	F	35.01	integral to membrane	transport	protein binding
1960246	Melanoma inhibitory activity protein 3	Manual Assigned Name:Melanoma inhibitory activity protein 3 SwissPROT>MIA3_MOUSE>S615>Isoform 3 of Melanoma inhibitory activity protein 3 OS=Mus musculus GN=Mia3 IPI>Q8BI84>S1764>Melanoma inhibitory activity protein 3 IPI>Q8BI84-3>S1764>Isoform 3 of Melanoma inhibitory activity protein 3 IPI>IPI00222037.3>S1764>Mia3 Isoform 1 of Melanoma inhibitory activity protein 3 IPI>IPI00850156.1>S1764>Mia3 …	K.HSASDPGPAPVVNS*SSR.S	S1764	UNI:Q8BI84	1.26568	0.0342506	4.87088e+06	4.87088e+06	3687555	4313449	4240040	7242474	3.84843e+06	2601571	4129236	3301912	5361021	582.26	0.573717	28.97	10.8814	0.826336	3	0		152040391	Melanoma inhibitory activity protein 3 precursor (Protein TANGO) [MASS=213673]	Q8BI84	MIA3_MOUSE		385819	0.573717	F	28.97	integral to membrane	transport	protein binding
1959488	A3 subunit of vacuolar-adenosine triphosphatase	Manual Assigned Name:A3 subunit of vacuolar-adenosine triphosphatase SwissPROT>Q91W06_MOUSE>S693>"T-cell, immune regulator 1, ATPase, H+ transporting, lysosomal V0 protein A3 OS=Mus musculus GN=Tcirg1" IPI>Q9JHF5>S693>A3 subunit of vacuolar-adenosine triphosphatase IPI>IPI00914724.1>S693>Tcirg1 T-cell, immune regulator 1 IPI>IPI00119320.4>S693>Tcirg1 T-cell, immune regulator 1, ATPase, H+ transpo…	K.LLASPDASTLENS*WSPDEEK.A	S693	UNI:Q9JHF5	1.26469	0.0397405	1.57878e+07	1.57878e+07	12980093	27529987	13182925	9458068	1.24835e+07	9380354	23179650	8425405	8948758	1139.01	0.110672	24.97	33.224	0.83206	2	0		7329158	vacuolar proton-translocating ATPase 100 kDa subunit isoform a3 [Mus musculus]	Q9JHF5	Q91W06_MOUSE		369843	0.100132	F	24.97	plasma membrane	ATP synthesis coupled proton transport	hydrogen ion transmembrane transporter activity	Oxidative phosphorylation Lysosome Epithelial cell signaling in Helicobacter pylori infection Vibrio cholerae infection
1960266	EH domain-binding protein 1-like protein 1	Manual Assigned Name:EH domain-binding protein 1-like protein 1 SwissPROT>EH1L1_MOUSE>S499>Isoform 5 of EH domain-binding protein 1-like protein 1 OS=Mus musculus GN=Ehbp1l1 IPI>Q99MS7>S1444>EH domain-binding protein 1-like protein 1 IPI>Q99MS7-2>S1444>Isoform 2 of EH domain-binding protein 1-like protein 1 IPI>Q99MS7-3>S1444>Isoform 3 of EH domain-binding protein 1-like protein 1 IPI>Q99MS7-4>S1…	R.RSS*VNGEAGPVPPPR.A	S1444*	UNI:Q99MS7	1.26422	0.0477676	2.86578e+06	2.86578e+06	3541134	3597025	2283253	2041709	2.26683e+06	2271355	2789636	2151151	1855176	540.598	0.115448	34.46	25.3523	0.780249	3	0		81903237	EH domain-binding protein 1-like protein 1 (Tangerin)	Q99MS7	EH1L1_MOUSE		377765	0.115448	F	34.46
1959119	Cobl-like 1	Manual Assigned Name:Cobl-like 1 SwissPROT>B1AZ14_MOUSE>S268>Cobl-like 1 OS=Mus musculus GN=Cobll1 SwissPROT>B1AZ15_MOUSE>S268>Cobl-like 1 OS=Mus musculus GN=Cobll1 SwissPROT>B1AZ26_MOUSE>S301>Cobl-like 1 (Fragment) OS=Mus musculus GN=Cobll1 SwissPROT>COBL1_MOUSE>S268>Isoform 4 of Cordon-bleu protein-like 1 OS=Mus musculus GN=Cobll1 IPI>B1AZ14>S268>Cobl-like 1 IPI>B1AZ15>S268>Cobl-like 1 IPI>B1AZ…	R.EQTAS*APATPLVSK.H	S268	UNI:B1AZ14	1.26356	0.0396527	6.36485e+06	6.36485e+06	5812711	7914459	7434870	4297344	5.03724e+06	4222555	7361931	6013792	2550664	740.358	0.50145	67.93	44.9354	0.851717	2	0		118568015	Cordon-bleu protein-like 1 (Cobl-related protein 1) [MASS=137381]	B1AZ14	COBL1_MOUSE		386496	0.0892067	F	67.93
1959123	Cobl-like 1	Manual Assigned Name:Cobl-like 1 SwissPROT>B1AZ14_MOUSE>S268>Cobl-like 1 OS=Mus musculus GN=Cobll1 SwissPROT>B1AZ15_MOUSE>S268>Cobl-like 1 OS=Mus musculus GN=Cobll1 SwissPROT>B1AZ26_MOUSE>S301>Cobl-like 1 (Fragment) OS=Mus musculus GN=Cobll1 SwissPROT>COBL1_MOUSE>S268>Isoform 4 of Cordon-bleu protein-like 1 OS=Mus musculus GN=Cobll1 IPI>B1AZ14>S268>Cobl-like 1 IPI>B1AZ15>S268>Cobl-like 1 IPI>B1AZ…	R.EQTAS*APATPLVSK.H	S268	UNI:B1AZ14	1.26356	0.0396527	6.36485e+06	6.36485e+06	5812711	7914459	7434870	4297344	5.03724e+06	4222555	7361931	6013792	2550664	744.365	0.207028	54.72	28.9425	0.855377	2	0		118568015	Cordon-bleu protein-like 1 (Cobl-related protein 1) [MASS=137381]	B1AZ14	COBL1_MOUSE		386496	0.122335	F	54.72
1959639	Serine/arginine-rich splicing factor 7	Manual Assigned Name:Serine/arginine-rich splicing factor 7 SwissPROT>SFRS7_MOUSE>S208S210S212>Splicing factor, arginine/serine-rich 7 SwissPROT>SRSF7_MOUSE>S179S181S183>Isoform 4 of Serine/arginine-rich splicing factor 7 OS=Mus musculus GN=Srsf7 IPI>Q8BL97>S208S210S212>Serine/arginine-rich splicing factor 7 IPI>Q8BL97-2>S208S210S212>Isoform 2 of Serine/arginine-rich splicing factor 7 IPI>Q8BL97-…	R.S*RS*GS*IIGSR.Y	S208S210S212	UNI:Q8BL97	1.26147	0.042928	3.21991e+06	3.21991e+06	1304604	3508119	4765465	3301433	2.5525e+06	814375	2741860	3382367	3271400	640.241	0.728424	24.5	62.2151	0.730495	2	0		71162370	Splicing factor, arginine/serine-rich 7	Q8BL97	SRSF7_MOUSE		390866	0.0562731	F	24.5	nucleus	mRNA processing	protein binding	Spliceosome
1958812	Eukaryotic translation initiation factor 3 subunit B	Manual Assigned Name:Eukaryotic translation initiation factor 3 subunit B SwissPROT>Q8CIJ3_MOUSE>Eif3b protein OS=Mus musculus GN=Eif3b IPI>Q8JZQ9>Eukaryotic translation initiation factor 3 subunit B IPI>IPI00229859.1>Eif3b Eif3b protein IPI>E9PX78>Uncharacterized protein IPI>IPI00761592.1>Eif3b 109 kDa protein NCBI>81914516>Eukaryotic translation initiation factor 3 subunit B (Eukaryotic transla…	R.GHPSAGAEEEGGS*DGS*AAEAEPR.A	S120S123	UNI:Q8JZQ9	1.26002	0.0323339	6.22463e+06	6.22463e+06	3220913	7017015	7933088	6727493	4.9401e+06	2456146	5059338	5856620	6388300	779.956	0.503453	44.83	50.0509	0.928569	3	0		81914516	Eukaryotic translation initiation factor 3 subunit B (Eukaryotic translation initiation factor 3 subunit 9) (eIF-3-eta) (eIF3 p116)	Q8JZQ9	EIF3B_MOUSE		387347	0.197189	F	44.83	cytoplasm	translation	nucleotide binding
1960176	Bcl-2-associated transcription factor 1	Manual Assigned Name:Bcl-2-associated transcription factor 1 SwissPROT>BCLF1_MOUSE>S492>Isoform 3 of Bcl-2-associated transcription factor 1 OS=Mus musculus GN=Bclaf1 SwissPROT>Q3UR37_MOUSE>S492>Putative uncharacterized protein (Fragment) OS=Mus musculus GN=Bclaf1 IPI>Q8K019>S494>Bcl-2-associated transcription factor 1 IPI>Q8K019-2>S494>Isoform 2 of Bcl-2-associated transcription factor 1 IPI>Q8K…	K.KEVQS*PEQVK.S	S494*	UNI:Q8K019	1.25983	0.0328695	939295	939295	673103	1000569	1067644	1015864	745570	533781	727376	762268	958856	626.302	0.552893	24.57	100	0.34876	2	0		47605501	Bcl-2-associated transcription factor 1 (Btf) [MASS=106001]	Q8K019	Q3UR37_MOUSE		379214	0.552893	F	24.57	nucleus membrane integral to membrane	regulation of transcription negative regulation of transcription	protein binding
1958918	Tensin-like C1 domain-containing phosphatase	Manual Assigned Name:Tensin-like C1 domain-containing phosphatase SwissPROT>TENC1_MOUSE>S1087>Isoform 4 of Tensin-like C1 domain-containing phosphatase OS=Mus musculus GN=Tenc1 IPI>Q8CGB6>S1087>Tensin-like C1 domain-containing phosphatase IPI>Q8CGB6-2>S1087>Isoform 2 of Tensin-like C1 domain-containing phosphatase IPI>Q8CGB6-3>S1087>Isoform 3 of Tensin-like C1 domain-containing phosphatase IPI>Q8…	R.HLPGSGQQPS*PPAR.S	S1087	UNI:Q8CGB6	1.25854	0.0264414	4.2884e+06	4.2884e+06	3258196	4365897	5674229	3855285	3.40743e+06	2633645	3904082	4051640	3040370	506.908	0.277868	20.79	42.6054	0.825256	3	0		81878080	Tensin-like C1 domain-containing phosphatase (C1 domain-containing phosphatase and tensin homolog) (C1-TEN) (Tensin-2)	Q8CGB6	TENC1_MOUSE		378617	0.277868	F	20.79	membrane	intracellular signaling cascade	protein binding
1958697	Myosin-9	Manual Assigned Name:Myosin-9 SwissPROT>MYH9_MOUSE>S1943>Myosin-9 OS=Mus musculus GN=Myh9 IPI>Q8VDD5>S1943>Myosin-9 IPI>IPI00123181.3>S1943>Myh9 Myosin-9 IPI>IPI00123181.4>S1943>Myh9 Myosin-9 IPI>IPI00788324.1>S1943>Myh9 15 days pregnant adult female amnion cDNA, RIKEN full-length enriched library, clone:M421002E03 product:myosin heavy chain IX, full insert sequence NCBI>205371802>S1943>RecName: …	R.KGTGDCS*DEEVDGK.A	S1943*	UNI:Q8VDD5	1.25838	0.0480929	1.17719e+07	1.17719e+07	6923048	14809875	13265755	12088758	9.35475e+06	4840358	10169877	9594983	12813780	526.199	0.578466	49.38	24.038	0.912708	3	0		205371802	RecName: Full=Myosin-9; AltName: Full=Myosin heavy chain 9; AltName: Full=Myosin heavy chain, non-muscle IIa; AltName: Full=Non-muscle myosin heavy chain IIa; Short=NMMHC II-a; Short=NMMHC-IIA; AltName: Full=Cellular myosin heavy chain, type A; AltName: Full=Non-muscle myosin heavy chain A; Short=NMMHC-A	Q8VDD5	MYH9_MOUSE		392678	0.23405	F	49.38	nucleus	cell adhesion	protein binding	Tight junction Viral myocarditis
1958847	Ahnak AHNAK nucleoprotein isoform 1	Manual Assigned Name:Ahnak AHNAK nucleoprotein isoform 1 IPI>IPI00553798.2>Ahnak AHNAK nucleoprotein isoform 1 IPI>E9Q1H8>Uncharacterized protein IPI>E9Q616>Uncharacterized protein NCBI>34766351>AHNAK [Mus musculus] [MASS=68761] NCBI>18204820>AA589382 protein [Mus musculus] NCBI>61743961>AHNAK nucleoprotein isoform 1 [Mus musculus] [MASS=604249] NCBI>26251953>Unknown (protein for IMAGE:3711699) […	K.GHYEVTGS*DDEAGK.L	S5607	UNI:IPI00553798.2	1.25734	0.016086	2.60332e+06	2.60332e+06	2058203	3679662	4011159	664256	2.07049e+06	1604807	2775274	3389899	511983	772.799	0.195521	60.1	55.2084	0.925849	2	0		34766351	AHNAK [Mus musculus] [MASS=68761]	IPI00553798.2				0.117831	F	60.1
1959192	Pre-mRNA 3'-end-processing factor FIP1	Manual Assigned Name:Pre-mRNA 3'-end-processing factor FIP1 HPRD>09646_1>S492>FIP1 like 1 SwissPROT>D3Z3F1_MOUSE>S487>Uncharacterized protein OS=Mus musculus GN=Fip1l1 SwissPROT>D3Z4V2_MOUSE>S493>Uncharacterized protein OS=Mus musculus GN=Fip1l1 SwissPROT>D3Z619_MOUSE>S428>Uncharacterized protein OS=Mus musculus GN=Fip1l1 IPI>Q9D824>S479>Pre-mRNA 3'-end-processing factor FIP1 IPI>Q9D824-2>S479>Is…	R.DHS*PTPSVFNSDEER.Y	S479*	UNI:Q9D824	1.25536	0.0490369	7.28865e+06	7.28865e+06	5761673	8358047	9159485	5875408	5.80604e+06	4027365	6374055	6630023	6192726	599.576	0.10074	54	3.9794	0.949753	3	0		81881579	Pre-mRNA 3'-end-processing factor FIP1 (FIP1-like 1)	Q9D824	D3Z619_MOUSE	09646_1	388692	0.10074	F	54	nucleus	mRNA processing	RNA binding
1959748	Pre-mRNA 3'-end-processing factor FIP1	Manual Assigned Name:Pre-mRNA 3'-end-processing factor FIP1 HPRD>09646_1>S496>FIP1 like 1 SwissPROT>D3Z3F1_MOUSE>S491>Uncharacterized protein OS=Mus musculus GN=Fip1l1 SwissPROT>D3Z4V2_MOUSE>S497>Uncharacterized protein OS=Mus musculus GN=Fip1l1 SwissPROT>D3Z619_MOUSE>S432>Uncharacterized protein OS=Mus musculus GN=Fip1l1 IPI>Q9D824>S483>Pre-mRNA 3'-end-processing factor FIP1 IPI>Q9D824-2>S483>Is…	R.DHSPTPS*VFNSDEER.Y	S483*	UNI:Q9D824	1.25536	0.0490369	7.28865e+06	7.28865e+06	5761673	8358047	9159485	5875408	5.80604e+06	4027365	6374055	6630023	6192726	599.576	0.305001	32.63	9.42795	0.905678	3	0		81881579	Pre-mRNA 3'-end-processing factor FIP1 (FIP1-like 1)	Q9D824	D3Z619_MOUSE	09646_1	388692	0.305001	F	32.63	nucleus	mRNA processing	RNA binding
1959984	Pre-mRNA 3'-end-processing factor FIP1	Manual Assigned Name:Pre-mRNA 3'-end-processing factor FIP1 HPRD>09646_1>T494>FIP1 like 1 SwissPROT>D3Z3F1_MOUSE>T489>Uncharacterized protein OS=Mus musculus GN=Fip1l1 SwissPROT>D3Z4V2_MOUSE>T495>Uncharacterized protein OS=Mus musculus GN=Fip1l1 SwissPROT>D3Z619_MOUSE>T430>Uncharacterized protein OS=Mus musculus GN=Fip1l1 IPI>Q9D824>T481>Pre-mRNA 3'-end-processing factor FIP1 IPI>Q9D824-2>T481>Is…	R.DHSPT*PSVFNSDEER.Y	T481*	UNI:Q9D824	1.25536	0.0490369	7.28865e+06	7.28865e+06	5761673	8358047	9159485	5875408	5.80604e+06	4027365	6374055	6630023	6192726	602.911	1.56804	22.19		0.875863	3	0		81881579	Pre-mRNA 3'-end-processing factor FIP1 (FIP1-like 1)	Q9D824	D3Z619_MOUSE	09646_1	388692	1.56804	F	22.19	nucleus	mRNA processing	RNA binding
1959560	Heterogeneous nuclear ribonucleoprotein D0	Manual Assigned Name:Heterogeneous nuclear ribonucleoprotein D0 HPRD>03206_1>S82>Heterogeneous nuclear ribonucleoprotein D HPRD>03206_3>S82>Heterogeneous nuclear ribonucleoprotein D IPI>Q60668>S82>Heterogeneous nuclear ribonucleoprotein D0 IPI>Q60668-3>S82>Isoform 3 of Heterogeneous nuclear ribonucleoprotein D0 IPI>IPI00330958.2>S82>Hnrnpd Isoform 1 of Heterogeneous nuclear ribonucleoprotein D0 I…	K.NEEDEGHSNS*SPR.H	S82*	UNI:Q60668	1.25243	0.0246184	120530	120530	89508	168942	191379	32291	96236.9	72606	144411	145011	22919	774.285	0.0504018	25.36	12.3145	0.239738	2	0		33516945	Heterogeneous nuclear ribonucleoprotein D0 (hnRNP D0) (AU-rich element RNA-binding protein 1) [MASS=38354]	Q60668	HNRPD_MOUSE	03206_3	386449	0.0504018	F	25.36	nucleus	regulation of transcription, DNA-dependent regulation of transcription nucleocytoplasmic transport	protein binding
1959671	Isoform 3 of Peripheral plasma membrane protein CASK	Manual Assigned Name:Isoform 3 of Peripheral plasma membrane protein CASK IPI>O70589-3>S569>Isoform 3 of Peripheral plasma membrane protein CASK IPI>IPI00776341.2>S569>Cask Isoform 3 of Peripheral plasma membrane protein CASK NCBI>123213541>S543>calcium/calmodulin-dependent serine protein kinase (MAGUK family) [Mus musculus] NCBI>123292791>S543>calcium/calmodulin-dependent serine protein kinase (…	R.TQS*SSCEDLPSTTQPK.G	S569	UNI:O70589-3	1.25175	0.0308302	1.80062e+06	1.80062e+06	657896	2455086	1927445	2162057	1.43848e+06	523907	1908754	1333325	1987935	615.924	0.345657	25.91	9.20819	0.743069	3	0		123213541	calcium/calmodulin-dependent serine protein kinase (MAGUK family) [Mus musculus]	O70589-3	CSKP_MOUSE			0.345657	F	25.91	integral to membrane	protein amino acid phosphorylation	protein binding	Tight junction
1959217	Ankyrin repeat domain-containing protein 57	Manual Assigned Name:Ankyrin repeat domain-containing protein 57 SwissPROT>ANR57_MOUSE>S82>Ankyrin repeat domain-containing protein 57 OS=Mus musculus GN=Ankrd57 IPI>Q8C0J6>S82>Ankyrin repeat domain-containing protein 57 IPI>IPI00223838.2>S82>Ankrd57 Ankyrin repeat domain-containing protein 57 NCBI>125987710>S82>Ankyrin repeat domain-containing protein 57 [MASS=54938] NCBI>187173282>S82>ankyrin r…	R.FCTGDS*PPLEAK.L	S82	UNI:Q8C0J6	1.25105	0.0435299	8.89882e+06	8.89882e+06	10464774	11183932	8312859	5633701	7.11307e+06	8536038	7525325	6907089	5483826	701.292	1.04739	32.53	68.0645	0.844393	2	0		125987710	Ankyrin repeat domain-containing protein 57 [MASS=54938]	Q8C0J6	ANR57_MOUSE		394572	0.429517	F	32.53
1959411	Importin subunit alpha-3	Manual Assigned Name:Importin subunit alpha-3 HPRD>03536_1>S60>Karyopherin alpha3 SwissPROT>IMA3_MOUSE>S60>Importin subunit alpha-3 OS=Mus musculus GN=Kpna3 SwissPROT>Q9CT07_MOUSE>S60>Putative uncharacterized protein (Fragment) OS=Mus musculus GN=Kpna3 IPI>O35344>S60>Importin subunit alpha-3 IPI>IPI00230429.4>S60>Kpna3 Importin subunit alpha-3 IPI>E9Q1R3>S60>Uncharacterized protein IPI>IPI0013515…	R.NVPQEESLEDS*DVDADFK.A	S60*	UNI:O35344	1.24971	0.0246184	1.72726e+07	1.72726e+07	15839568	25946539	16964379	10339907	1.38213e+07	12226093	20570599	13121889	9366515	1058.93	0.462005	25.46	40.192	0.852875	2	0		3122277	Importin alpha-3 subunit (Karyopherin alpha-3 subunit) (Importin alpha Q2)	O35344	Q9CT07_MOUSE	03536_1	372546	0.459171	F	25.46	nucleus	transport intracellular protein transport	protein binding binding
1958842	Protein KRI1 homolog	Manual Assigned Name:Protein KRI1 homolog SwissPROT>KRI1_MOUSE>S148>Protein KRI1 homolog OS=Mus musculus GN=Kri1 IPI>Q8VDQ9>S148>Protein KRI1 homolog IPI>IPI00311761.3>S148>Kri1 Protein KRI1 homolog IPI>F6WIU1>S148>Uncharacterized protein (Fragment) NCBI>156630946>S148>Protein KRI1 homolog [MASS=82601] NCBI>157909778>S142>KRI1 homolog [Mus musculus] NCBI>148693228>S142>cDNA sequence BC021438 [Mus…	K.YVDEDNS*DGETVDHR.L	S148*	UNI:Q8VDQ9	1.24967	0.0210144	685412	685412	499868	738481	951764	551536	548474	382229	560917	779833	470916	614.235	0.103765	29.55	27.8658	0.966083	3	0		156630946	Protein KRI1 homolog [MASS=82601]	Q8VDQ9	KRI1_MOUSE		378263	0.103765	F	29.55
1959427	Kinesin light chain 2	Manual Assigned Name:Kinesin light chain 2 HPRD>13917_1>S582>FLJ12387 SwissPROT>D3YXZ3_MOUSE>S577>Uncharacterized protein OS=Mus musculus GN=Klc2 SwissPROT>KLC2_MOUSE>S575>Kinesin light chain 2 OS=Mus musculus GN=Klc2 SwissPROT>Q91YS4_MOUSE>S579>Kinesin light chain 2 OS=Mus musculus GN=Klc2 IPI>O88448>S575>Kinesin light chain 2 IPI>Q91YS4>S575>Kinesin light chain 2 IPI>IPI00844651.1>S575>Klc2 Kin…	R.ASS*LNFLNK.S	S575*	UNI:O88448	1.2492	0.0285086	1.69592e+07	1.69592e+07	13910935	24425749	19455469	10044485	1.3576e+07	10428564	18552731	16038491	9284214	541.262	0.76929	39.16	39.9127	0.950111	2	0		13878547	Kinesin light chain 2 (KLC 2)	O88448	Q91YS4_MOUSE	13917_1	373614	0.76929	F	39.16	cytoplasm kinesin complex	microtubule-based movement axon cargo transport regulation of ARF GTPase activity translation	protein binding binding
1958615	Eukaryotic translation initiation factor 3 subunit G	Manual Assigned Name:Eukaryotic translation initiation factor 3 subunit G SwissPROT>EIF3G_MOUSE>T41>Eukaryotic translation initiation factor 3 subunit G OS=Mus musculus GN=Eif3g SwissPROT>IF34_MOUSE>T41>Eukaryotic translation initiation factor 3 subunit 4 (eIF-3 delta) (eIF3 p44) (eIF-3 RNA-binding subunit) (eIF3 p42) (Eif3p42) (eIF3g) IPI>Q9Z1D1>T41>Eukaryotic translation initiation factor 3 sub…	K.GIPLPTGDT*SPEPELLPGDPLPPPK.E	T41*	UNI:Q9Z1D1	1.24862	0.0279269	7.46525e+06	7.46525e+06	6963433	7882781	8142178	6872598	5.97882e+06	5190311	5843030	6563408	6318530	1311.66	1.11657	32.55	13.8917	0.500647	2	0		23503073	Eukaryotic translation initiation factor 3 subunit 4 (eIF-3 delta) (eIF3 p44) (eIF-3 RNA-binding subunit) (eIF3 p42) (Eif3p42) (eIF3g)	Q9Z1D1	IF34_MOUSE			1.11657	F	32.55	cytoplasm	translation	protein binding
1958710	Serine/arginine repetitive matrix protein 2	Manual Assigned Name:Serine/arginine repetitive matrix protein 2 HPRD>06913_1>S1925T1927>SRRM2 SwissPROT>SRRM2_MOUSE>S1878T1880>Isoform 3 of Serine/arginine repetitive matrix protein 2 OS=Mus musculus GN=Srrm2 IPI>Q8BTI8>S1878T1880>Serine/arginine repetitive matrix protein 2 IPI>Q8BTI8-2>S1878T1880>Isoform 2 of Serine/arginine repetitive matrix protein 2 IPI>Q8BTI8-3>S1878T1880>Isoform 3 of Serin…	R.S*RT*PPVTR.R	S1878T1880	UNI:Q8BTI8	1.24801	0.0285086	2.35587e+06	2.35587e+06	1261537	2358590	3133320	2670032	1.88769e+06	1015671	1756837	2309323	2468945	365.161	0.670343	31.24	75.4343	0.927799	3	0		341942108	RecName: Full=Serine/arginine repetitive matrix protein 2	Q8BTI8	SRRM2_MOUSE	06913_1	392144	0.247835	F	31.24	nucleus	mRNA processing	protein binding
1960062	Ras-related GTP-binding protein C	Manual Assigned Name:Ras-related GTP-binding protein C HPRD>12198_1>S95>Ras related GTP binding C HPRD>12199_1>S96>Ras related GTP binding D SwissPROT>RRAGC_MOUSE>S94>Isoform 2 of Ras-related GTP-binding protein C OS=Mus musculus GN=Rragc IPI>Q99K70>S94>Ras-related GTP-binding protein C IPI>Q99K70-2>S94>Isoform 2 of Ras-related GTP-binding protein C IPI>IPI00463574.1>S94>Rragc Isoform 2 of Ras-re…	K.MSPNETLFLES*TNK.I	S94*	UNI:Q99K70	1.24777	0.0469264	1.93706e+07	1.93706e+07	13289283	35909202	15713979	12569752	1.55242e+07	8650814	27782583	13172261	12491066	566.923	0.804707	22.57	7.78151	0.713312	3	0		81880094	Ras-related GTP-binding protein C (Rag C) (GTPase-interacting protein 2) (TIB929)	Q99K70	RRAGC_MOUSE	12199_1	375320	0.804707	F	22.57	nucleus	apoptosis transcription immune response	protein binding
1959632	Bcl-2-associated transcription factor 1	Manual Assigned Name:Bcl-2-associated transcription factor 1 HPRD>16544_1>S177>BCL2 associated transcription factor 1 HPRD>16544_2>S175>BCL2 associated transcription factor 1 HPRD>16544_3>S177>BCL2 associated transcription factor 1 SwissPROT>BCLF1_MOUSE>S175>Isoform 3 of Bcl-2-associated transcription factor 1 OS=Mus musculus GN=Bclaf1 SwissPROT>Q3UR37_MOUSE>S175>Putative uncharacterized protein …	K.KAEGEPQEES*PLK.S	S177*	UNI:Q8K019	1.24534	0.0246184	2.4271e+06	2.4271e+06	2470780	3037846	2760223	1439567	1.94895e+06	1817214	2364529	2351977	1262076	761.346	0.373271	48.69	100	0.892755	2	0		47605501	Bcl-2-associated transcription factor 1 (Btf) [MASS=106001]	Q8K019	Q3UR37_MOUSE	16544_3	379214	0.0578307	F	48.69	nucleus membrane integral to membrane	regulation of transcription negative regulation of transcription	protein binding
1958902	Tln2 talin-2	Manual Assigned Name:Tln2 talin-2 HPRD>09555_1>T1843>Talin 2 SwissPROT>B2RY15_MOUSE>T1843>Tln2 protein OS=Mus musculus GN=Tln2 SwissPROT>Q68FD6_MOUSE>T1061>Tln2 protein OS=Mus musculus GN=Tln2 SwissPROT>Q8CDM9_MOUSE>T753>Putative uncharacterized protein OS=Mus musculus GN=Tln2 SwissPROT>Q8CHG4_MOUSE>T757>MKIAA0320 protein (Fragment) OS=Mus musculus GN=Tln2 IPI>IPI00229647.5>T1844>Tln2 talin-2 IPI…	K.LDEGT*PPEPK.G	T1844*	UNI:IPI00229647.5	1.24406	0.0314417	5.34411e+06	5.34411e+06	4354400	5472940	6301337	5247778	4.29569e+06	3452208	4087916	4673942	4968686	585.762	0.258006	29.17	100	0.858389	2	0		51261360	Tln2 protein [Mus musculus] [MASS=186688]	IPI00229647.5	Q8CHG4_MOUSE	09555_1	378739	0.258006	F	29.17	membrane cytoskeleton synapse	cell adhesion cytoskeletal anchoring at plasma membrane visual perception skeletal muscle tissue development	protein binding actin binding	Focal adhesion
1958729	Serine/arginine-rich splicing factor 2	Manual Assigned Name:Serine/arginine-rich splicing factor 2 HPRD>02888_1>S206S208S212S220>Splicing factor, arginine/serine rich 2 SwissPROT>SFRS2_MOUSE>S205S207S211S219>Splicing factor, arginine/serine-rich 2 (Splicing factor SC35) (SC-35) (Splicing component, 35 kDa) (PR264 protein) SwissPROT>SRSF2_MOUSE>S206S208S212S220>Serine/arginine-rich splicing factor 2 OS=Mus musculus GN=Srsf2 IPI>Q62093>…	R.S*KS*PPKS*PEEEGAVS*S.-	S206S208S212S220	UNI:Q62093	1.24398	0.0230352	1.48493e+06	1.48493e+06	885680	2110869	2472847	470316	1.19369e+06	645017	1739596	1991571	398573	968.326	0.667478	33.21	135.467	0.762949	2	0		18280933	Splicing factor, arginine/serine-rich 2 (Splicing factor SC35) (SC-35) (Splicing component, 35 kDa) (PR264 protein)	Q62093	SRSF2_MOUSE	02888_1		0.667478	F	33.21	nucleus cytoplasm mitochondrion	mRNA processing translation signal transduction	protein binding nucleotide binding	Spliceosome
1958655	40S ribosomal protein S17	Manual Assigned Name:40S ribosomal protein S17 HPRD>01600_1>S113>Ribosomal protein S17 HPRD>18936_1>S113>Similar to 40S ribosomal protein S17 SwissPROT>RS17_MOUSE>S113>40S ribosomal protein S17 OS=Mus musculus GN=Rps17 IPI>P63276>S113>40S ribosomal protein S17 IPI>IPI00465880.4>S113>Rps17 40S ribosomal protein S17 IPI>F7BBI3>S113>Uncharacterized protein (Fragment) IPI>IPI00755495.2>S113>Gm12034 s…	K.LLDFGS*LSNLQVTQPTVGMNFK.T	S113*	UNI:P63276	1.2427	0.0371002	1.31822e+06	1.31822e+06	1661788	1508592	784285		1.06078e+06	1386420	1246448	549458		1245.11	0.374415	61.11	29.8287	0.935793	2	0		54039390	40S ribosomal protein S17	P63276	RS17_MOUSE	18936_1	388896	0.374415	F	61.11	intracellular	translation	structural constituent of ribosome	Ribosome
1959365	Acetyl-coenzyme A synthetase, cytoplasmic	Manual Assigned Name:Acetyl-coenzyme A synthetase, cytoplasmic SwissPROT>A2AQN4_MOUSE>S30>Acyl-CoA synthetase short-chain family member 2 OS=Mus musculus GN=Acss2 SwissPROT>A2AQN5_MOUSE>S30>Acyl-CoA synthetase short-chain family member 2 OS=Mus musculus GN=Acss2 SwissPROT>ACSA_MOUSE>S30>"Acetyl-coenzyme A synthetase, cytoplasmic OS=Mus musculus GN=Acss2" SwissPROT>D6RHA7_MOUSE>S30>Uncharacterized…	R.GWS*PPPEVR.R	S30*	UNI:Q9QXG4	1.24197	0.0230352	6.01383e+06	6.01383e+06	5873112	7157518	5347973	5676703	4.84217e+06	5075593	5873633	4148644	4270801	368.834	0.725224	41.37	100	0.958144	3	0		6691151	acetyl-CoA synthetase [Mus musculus]	Q9QXG4	Q8BK97_MOUSE		385364	0.643738	F	41.37	cytoplasm membrane nucleus	metabolic process	ATP binding catalytic activity	Glycolysis / Gluconeogenesis Pyruvate metabolism Propanoate metabolism Reductive carboxylate cycle (CO2 fixation)
1960180	Ahnak AHNAK nucleoprotein isoform 1	Manual Assigned Name:Ahnak AHNAK nucleoprotein isoform 1 IPI>IPI00553798.2>Ahnak AHNAK nucleoprotein isoform 1 IPI>E9Q1H8>Uncharacterized protein IPI>E9Q616>Uncharacterized protein NCBI>34766351>AHNAK [Mus musculus] [MASS=68761] NCBI>18204820>AA589382 protein [Mus musculus] NCBI>26251953>Unknown (protein for IMAGE:3711699) [Mus musculus]	R.HRS*NS*FSDER.E	S5553S5555	UNI:IPI00553798.2	1.23993	0.0255401	742926	742926	472771	853842	807687	837404	599169	419528	626165	680212	670770	472.173	0.460939	25.35	22.281	0.859089	3	0		34766351	AHNAK [Mus musculus] [MASS=68761]	IPI00553798.2				0.460939	F	25.35	nucleus	nervous system development	protein binding
1959380	Prelamin-A/C	Manual Assigned Name:Prelamin-A/C HPRD>01035_2>S628>Lamin A/C HPRD>01035_3>S598>Lamin A/C SwissPROT>LAMA_MOUSE>S629>Lamin A IPI>P48678>S629>Prelamin-A/C IPI>IPI00620256.3>S629>Lmna Isoform A of Prelamin-A/C NCBI>85700428>S629>Lamin-A/C NCBI>148683328>S629>lamin A, isoform CRA_a [Mus musculus] [MASS=74237] NCBI>112378771>S629>lamin A [Mus musculus] NCBI>62739248>S629>Lamin A [Mus musculus] NCBI>22…	R.S*VGGSGGGSFGDNLVTR.S	S629	UNI:P48678	1.23937	0.0297234	1.7282e+07	1.7282e+07	11475526	22654727	19993367	15004269	1.39442e+07	7828172	20122804	15222895	12602883	823.862	0.122668	86.82	17.1031	0.825685	2	0		85700428	Lamin-A/C	P48678	LAMA_MOUSE	01035_3	375038	0.0437234	F	86.82	nucleus intermediate filament	spermatogenesis DNA repair	protein binding structural molecule activity	Hypertrophic cardiomyopathy (HCM) Arrhythmogenic right ventricular cardiomyopathy (ARVC) Dilated cardiomyopathy
1959381	Prelamin-A/C	Manual Assigned Name:Prelamin-A/C HPRD>01035_2>S632>Lamin A/C HPRD>01035_3>S602>Lamin A/C SwissPROT>LAMA_MOUSE>S633>Lamin A IPI>P48678>S633>Prelamin-A/C IPI>IPI00620256.3>S633>Lmna Isoform A of Prelamin-A/C NCBI>85700428>S633>Lamin-A/C NCBI>148683328>S633>lamin A, isoform CRA_a [Mus musculus] [MASS=74237] NCBI>112378771>S633>lamin A [Mus musculus] NCBI>62739248>S633>Lamin A [Mus musculus] NCBI>22…	R.SVGGS*GGGSFGDNLVTR.S	S633	UNI:P48678	1.23937	0.0297234	1.7282e+07	1.7282e+07	11475526	22654727	19993367	15004269	1.39442e+07	7828172	20122804	15222895	12602883	828.867	0.415277	106.89	28.1081	0.845458	2	0		85700428	Lamin-A/C	P48678	LAMA_MOUSE	01035_3	375038	0.415277	F	106.89	nucleus intermediate filament	spermatogenesis DNA repair	protein binding structural molecule activity	Hypertrophic cardiomyopathy (HCM) Arrhythmogenic right ventricular cardiomyopathy (ARVC) Dilated cardiomyopathy
1959568	Bcl-2-associated transcription factor 1	Manual Assigned Name:Bcl-2-associated transcription factor 1 HPRD>16544_1>S648>BCL2 associated transcription factor 1 HPRD>16544_2>S646>BCL2 associated transcription factor 1 HPRD>16544_3>S475>BCL2 associated transcription factor 1 SwissPROT>BCLF1_MOUSE>S644>Isoform 3 of Bcl-2-associated transcription factor 1 OS=Mus musculus GN=Bclaf1 SwissPROT>Q3UR37_MOUSE>S644>Putative uncharacterized protein …	R.QKS*PEIHR.R	S646*	UNI:Q8K019	1.23776	0.0246184	892596	892596	1240558	852868	826815	650142	721137	908034	719561	702560	554394	358.841	0.380639	22.99	100	0.921771	3	0		47605501	Bcl-2-associated transcription factor 1 (Btf) [MASS=106001]	Q8K019	Q3UR37_MOUSE	16544_3	379214	0.380639	F	22.99	nucleus membrane integral to membrane	regulation of transcription negative regulation of transcription	protein binding
1958998	Swi5-dependent recombination DNA repair protein 1 homolog	Manual Assigned Name:Swi5-dependent recombination DNA repair protein 1 homolog SwissPROT>CJ078_MOUSE>S67T70>Uncharacterized protein C10orf78 homolog OS=Mus musculus SwissPROT>Q3TH62_MOUSE>S67T70>Putative uncharacterized protein OS=Mus musculus GN=6330577E15Rik IPI>Q8BP27>S67T70>Swi5-dependent recombination DNA repair protein 1 homolog IPI>Q8BP27-2>S67T70>Isoform 2 of Swi5-dependent recombination …	R.ENPPS*PPT*SPAAPQPR.E	S67T70	UNI:Q8BP27	1.2356	0.0440881	4.77705e+06	4.77705e+06	3712453	5338149	4553113	5504502	3.86619e+06	2342341	3958307	4225744	4938353	604.925	0.0722655	20.75	19.1209	0.606099	3	0		19353460	6330577E15Rik protein [Mus musculus]	Q8BP27	Q3TH62_MOUSE		373715	0.0722655	F	20.75
1960262	Serine/arginine repetitive matrix protein 2	Manual Assigned Name:Serine/arginine repetitive matrix protein 2 IPI>Q8BTI8>Serine/arginine repetitive matrix protein 2 IPI>Q8BTI8-2>Isoform 2 of Serine/arginine repetitive matrix protein 2 IPI>IPI00785240.1>Srrm2 Isoform 1 of Serine/arginine repetitive matrix protein 2 IPI>IPI00785384.1>Srrm2 Isoform 2 of Serine/arginine repetitive matrix protein 2 IPI>IPI00874854.1>Srrm2 Srrm2 protein IPI>E9QMJ…	K.RVPS*PTPVPK.E	S2535	UNI:Q8BTI8	1.23371	0.0435864	2.95375e+06	2.95375e+06	5156247	3131108	1934059	1593569	2.3942e+06	3730133	2574365	1726055	1546236	588.319	0.120786	31.16	10.8814	0.804765	2	0		341942108	RecName: Full=Serine/arginine repetitive matrix protein 2	Q8BTI8	SRRM2_MOUSE		392144	0.120786	F	31.16	nucleus membrane	mRNA processing ER-associated protein catabolic process	protein binding
1959435	Protein phosphatase 1 regulatory subunit 12A	Manual Assigned Name:Protein phosphatase 1 regulatory subunit 12A SwissPROT>MYPT1_MOUSE>T443>Isoform 2 of Protein phosphatase 1 regulatory subunit 12A OS=Mus musculus GN=Ppp1r12a IPI>Q9DBR7>T443>Protein phosphatase 1 regulatory subunit 12A IPI>Q9DBR7-2>T443>Isoform 2 of Protein phosphatase 1 regulatory subunit 12A IPI>IPI00671847.3>T443>Ppp1r12a Isoform 1 of Protein phosphatase 1 regulatory subun…	K.T*GSYGALAEISASK.E	T443*	UNI:Q9DBR7	1.23251	0.0328695	3.41952e+07	3.41952e+07	27542568	61694761	33642543	13900987	2.77444e+07	20294584	47427643	31236533	12018957	717.828	1.11665	44.3	15.2288	0.873383	2	0		281185473	RecName: Full=Protein phosphatase 1 regulatory subunit 12A; AltName: Full=Myosin phosphatase-targeting subunit 1; Short=Myosin phosphatase target subunit 1	Q9DBR7	MYPT1_MOUSE		385473	0.0920084	F	44.3	cytoplasm intracellular membrane-bounded organelle	protein amino acid dephosphorylation	protein binding	Regulation of actin cytoskeleton Vascular smooth muscle contraction Focal adhesion Long-term potentiation
1959441	Protein phosphatase 1 regulatory subunit 12A	Manual Assigned Name:Protein phosphatase 1 regulatory subunit 12A SwissPROT>MYPT1_MOUSE>S445>Isoform 2 of Protein phosphatase 1 regulatory subunit 12A OS=Mus musculus GN=Ppp1r12a IPI>Q9DBR7>S445>Protein phosphatase 1 regulatory subunit 12A IPI>Q9DBR7-2>S445>Isoform 2 of Protein phosphatase 1 regulatory subunit 12A IPI>IPI00671847.3>S445>Ppp1r12a Isoform 1 of Protein phosphatase 1 regulatory subun…	K.TGS*YGALAEISASK.E	S445*	UNI:Q9DBR7	1.23251	0.0328695	3.41952e+07	3.41952e+07	27542568	61694761	33642543	13900987	2.77444e+07	20294584	47427643	31236533	12018957	721.836	0.042976	65.76	10.6145	0.944385	2	0		281185473	RecName: Full=Protein phosphatase 1 regulatory subunit 12A; AltName: Full=Myosin phosphatase-targeting subunit 1; Short=Myosin phosphatase target subunit 1	Q9DBR7	MYPT1_MOUSE		385473	0.042976	F	65.76	cytoplasm intracellular membrane-bounded organelle	protein amino acid dephosphorylation	protein binding	Regulation of actin cytoskeleton Vascular smooth muscle contraction Focal adhesion Long-term potentiation
1959099	Protein FAM54B	Manual Assigned Name:Protein FAM54B HPRD>14248_1>S103>Family with sequence similarity 54, member B SwissPROT>D3YW54_MOUSE>S100>Uncharacterized protein OS=Mus musculus GN=Fam54b SwissPROT>D3Z0X8_MOUSE>S100>Uncharacterized protein OS=Mus musculus GN=Fam54b SwissPROT>D6RCX5_MOUSE>S100>Uncharacterized protein OS=Mus musculus GN=Fam54b IPI>Q9CWE0>S100>Protein FAM54B IPI>IPI00109033.3>S100>Fam54b Isofo…	R.NAS*VPNLR.G	S100	UNI:Q9CWE0	1.23131	0.0094881	4.3518e+07	4.3518e+07	38615911	52679108	42878074	39898895	3.5343e+07	30213955	43423774	35008862	32725246	475.726	0.0505026	28.93	100	0.865074	2	0		81904209	Protein FAM54B	Q9CWE0	D6RCX5_MOUSE	14248_1	375410	0.0505026	F	28.93	cytoplasm	protein folding	isomerase activity
1959034	E3 ubiquitin-protein ligase UBR4	Manual Assigned Name:E3 ubiquitin-protein ligase UBR4 HPRD>10184_1>T2715S2719>Retinoblastoma associated factor 600 SwissPROT>UBR4_MOUSE>T2740S2744>Isoform 5 of E3 ubiquitin-protein ligase UBR4 OS=Mus musculus GN=Ubr4 IPI>A2AN08>T2712S2716>E3 ubiquitin-protein ligase UBR4 IPI>A2AN08-3>T2712S2716>Isoform 3 of E3 ubiquitin-protein ligase UBR4 IPI>A2AN08-5>T2712S2716>Isoform 5 of E3 ubiquitin-protein…	R.HVT*LPSS*PR.S	T2712S2716*	UNI:A2AN08	1.22837	0.0396527	4.35902e+06	4.35902e+06	3400718	5532127	6271166	2232079	3.54861e+06	2734551	4423665	4811011	2225219	582.248	0.268159	22.66	27.8314	0.895872	2	0		147742910	E3 ubiquitin-protein ligase UBR4 (N-recognin-4) (Zinc finger UBR1-type protein 1) (p600)	A2AN08	UBR4_MOUSE	10184_1	379987	0.268159	F	22.66	integral to membrane	modification-dependent protein catabolic process	zinc ion binding protein binding
1960174	Serine/arginine repetitive matrix 1	Manual Assigned Name:Serine/arginine repetitive matrix 1 HPRD>10441_1>T581S583>Serine arginine repetitive matrix protein 1 SwissPROT>A2A8V8_MOUSE>T586S588>Serine/arginine repetitive matrix 1 OS=Mus musculus GN=Srrm1 SwissPROT>A2A8V9_MOUSE>T595S597>Serine/arginine repetitive matrix 1 OS=Mus musculus GN=Srrm1 SwissPROT>A2A8W1_MOUSE>T45S47>Serine/arginine repetitive matrix 1 (Fragment) OS=Mus muscul…	R.RRT*PS*PPPR.R	T586S588	UNI:A2A8V8	1.22813	0.041313	1.156e+07	1.156e+07	7788057	11626290	13541822	13283878	9.41269e+06	5454011	9033303	9803717	13359745	418.528	0.351796	23.44	100	0.631198	3	0		347595715	RecName: Full=Serine/arginine repetitive matrix protein 1; AltName: Full=Plenty-of-prolines 101	A2A8V8	SRRM1_MOUSE	10441_1	375402	0.351796	F	23.44	nucleus spliceosomal complex	mRNA processing	DNA binding protein binding lysophospholipase activity zinc ion binding
1959751	Sodium/hydrogen exchanger	Manual Assigned Name:Sodium/hydrogen exchanger SwissPROT>Q7TSV2_MOUSE>S790>Sodium/hydrogen exchanger OS=Mus musculus GN=Slc9a1 SwissPROT>SL9A1_MOUSE>S790>Sodium/hydrogen exchanger 1 OS=Mus musculus GN=Slc9a1 IPI>Q7TSV2>S790>Sodium/hydrogen exchanger IPI>Q61165>S790>Sodium/hydrogen exchanger 1 IPI>IPI00380785.16>S790>Slc9a1 Sodium/hydrogen exchanger 1 IPI>IPI00622815.2>S790>Slc9a1 Sodium/hydrogen …	R.SKEPSSPGTDDVFTPGSSDS*PSSQR.I	S790*	UNI:Q7TSV2	1.22778	0.0396527	3.06623e+06	3.06623e+06	1192610	3001009	4040964	4030334	2.49738e+06	1023011	2711280	2735329	3519900	878.04	0.00455909	41.27	12.8794	0.791802	3	0		2498048	Sodium/hydrogen exchanger 1 (Na(+)/H(+) exchanger 1) (NHE-1)	Q7TSV2	SL9A1_MOUSE		389531	0.00455909	F	41.27	integral to membrane	transport	sodium ion binding transcription factor binding	Cardiac muscle contraction Regulation of actin cytoskeleton
1958700	High mobility group protein HMGI-C	Manual Assigned Name:High mobility group protein HMGI-C SwissPROT>HMGA2_MOUSE>S100S104>High mobility group protein HMGI-C OS=Mus musculus GN=Hmga2 SwissPROT>HMGIC_MOUSE>S100S104>High mobility group protein HMGI-C (High mobility group AT-hook 2) IPI>P52927>S100S104>High mobility group protein HMGI-C IPI>IPI00331612.3>S100S104>Hmga2 High mobility group protein HMGI-C NCBI>1708264>S100S104>High mobi…	K.KPAQETEETS*SQES*AEED.-	S100S104	UNI:P52927	1.2265	0.0198158	3.64615e+06	3.64615e+06	1390346	4323349	4677795	4193115	2.97281e+06	1168436	3727467	3737928	3257390	1077.88	0.69242	49.52	32.1899	0.821853	2	0		1708264	High mobility group protein HMGI-C (High mobility group AT-hook 2)	P52927	HMGIC_MOUSE			0.69242	F	49.52	nucleus	regulation of transcription, DNA-dependent	protein binding
1958634	Protein FAM54B	Manual Assigned Name:Protein FAM54B HPRD>14248_1>S238>Family with sequence similarity 54, member B IPI>Q9CWE0>S235>Protein FAM54B IPI>IPI00109033.3>S235>Fam54b Isoform 1 of Protein FAM54B NCBI>81904209>S235>Protein FAM54B NCBI>74138670>S235>unnamed protein product [Mus musculus] [MASS=31817] NCBI>20071110>S235>RIKEN cDNA 2410166I05 [Mus musculus] NCBI>12846538>S235>unnamed protein product [Mus mu…	K.ASS*FADMMGILK.D	S235	UNI:Q9CWE0	1.22575	0.0207587	2.07241e+07	2.07241e+07	22866337	24144413	15161494		1.69073e+07	18297507	20169997	12254358		679.803	0.234065	59.67		0.958317	2	0		81904209	Protein FAM54B	Q9CWE0	FA54B_MOUSE	14248_1	375410	0.234065	F	59.67	cytoplasm	protein folding	isomerase activity
1958720	Heat shock protein HSP 90-alpha	Manual Assigned Name:Heat shock protein HSP 90-alpha SwissPROT>HS90A_MOUSE>S231>Heat shock protein HSP 90-alpha OS=Mus musculus GN=Hsp90aa1 IPI>P07901>S231>Heat shock protein HSP 90-alpha IPI>IPI00330804.4>S231>Hsp90aa1 Heat shock protein HSP 90-alpha NCBI>1170384>S231>Heat shock protein HSP 90-alpha (HSP 86) (Tumor specific transplantation 86 kDa antigen) (TSTA) NCBI>148686719>S231>mCG14932, iso…	R.DKEVS*DDEAEEKEEK.E	S231*	UNI:P07901	1.22362	0.031713	3.61548e+06	3.61548e+06	1894941	4453662	7117527	995808	2.95475e+06	1508728	3879565	5494365	936347	620.585	0.915719	38.9	100	0.863274	3	0		1170384	Heat shock protein HSP 90-alpha (HSP 86) (Tumor specific transplantation 86 kDa antigen) (TSTA)	P07901	HS90A_MOUSE		372250	0.130126	F	38.9	cytoplasm	protein folding	protein binding	Pathways in cancer Plant-pathogen interaction Progesterone-mediated oocyte maturation Prostate cancer Antigen processing and presentation NOD-like receptor signaling pathway
1960149	Tuberin	Manual Assigned Name:Tuberin SwissPROT>Q3TCQ7_MOUSE>S1323>Putative uncharacterized protein OS=Mus musculus GN=Tsc2 SwissPROT>Q3UHB2_MOUSE>S1389>Putative uncharacterized protein OS=Mus musculus GN=Tsc2 SwissPROT>TSC2_MOUSE>S1323>Isoform F of Tuberin OS=Mus musculus GN=Tsc2 IPI>Q61037>S1388>Tuberin IPI>Q61037-2>S1388>Isoform A of Tuberin IPI>Q61037-3>S1388>Isoform B of Tuberin IPI>Q61037-4>S1388>Is…	K.SSS*SPELQTLQDILGDLGDK.I	S1388*	UNI:Q61037	1.22152	0.0346121	5.45221e+06	5.45221e+06	1869499	8063037	6424097		4.46348e+06	1565570	6178335	5646540		731.014	1.42764	21.38	6.19789	0.621169	3	0		9297076	Tuberin (Tuberous sclerosis 2 homolog protein)	Q61037	TSC2_MOUSE		392004	1.42764	F	21.38	nucleus cytoplasm	signal transduction negative regulation of cell proliferation	protein binding	Insulin signaling pathway mTOR signaling pathway p53 signaling pathway
1959585	Vacuolar protein sorting-associated protein 4B	Manual Assigned Name:Vacuolar protein sorting-associated protein 4B SwissPROT>VPS4B_MOUSE>Vacuolar protein sorting-associated protein 4B OS=Mus musculus GN=Vps4b IPI>P46467>Vacuolar protein sorting-associated protein 4B IPI>IPI00133700.2>Vps4b Vacuolar protein sorting-associated protein 4B NCBI>41019534>SKD1 protein (Vacuolar sorting protein 4b) NCBI>5712623>SKD1 [Mus musculus] NCBI>148707911>vac…	K.GNDS*DGEAESDDPEK.K	S102	UNI:P46467	1.22018	0.0351547	579361	579361	433254	503443	869415	511333	474815	304301	356025	790907	448029	822.781	0.394028	59.91	52.8794	0.895237	2	0		41019534	SKD1 protein (Vacuolar sorting protein 4b)	P46467	VPS4B_MOUSE		385650	0.394028	F	59.91	nucleus	transport potassium ion transport	protein binding	Endocytosis
1959664	Serine/arginine repetitive matrix protein 2	Manual Assigned Name:Serine/arginine repetitive matrix protein 2 IPI>Q8BTI8>Serine/arginine repetitive matrix protein 2 IPI>Q8BTI8-2>Isoform 2 of Serine/arginine repetitive matrix protein 2 IPI>Q8BTI8-3>Isoform 3 of Serine/arginine repetitive matrix protein 2 IPI>IPI00874854.1>Srrm2 Srrm2 protein IPI>E9QMJ6>Uncharacterized protein NCBI>341942108>RecName: Full=Serine/arginine repetitive matrix pro…	R.S*RS*RT*PLISR.R	S1832S1834T1836	UNI:Q8BTI8	1.21928	0.0415967	2.00775e+07	2.00775e+07	12090356	27654745	23321397	17243477	1.64667e+07	9328470	21219107	17850317	17468749	471.533	0.133797	20.15	27.6533	0.458371	3	0		341942108	RecName: Full=Serine/arginine repetitive matrix protein 2	Q8BTI8	SRRM2_MOUSE		392144	0.133797	F	20.15	nucleus	mRNA processing	protein binding
1960420	Transcription intermediary factor 1-beta	Manual Assigned Name:Transcription intermediary factor 1-beta SwissPROT>TIF1B_MOUSE>S51>Isoform 2 of Transcription intermediary factor 1-beta OS=Mus musculus GN=Trim28 IPI>Q62318>S51>Transcription intermediary factor 1-beta IPI>Q62318-2>S51>Isoform 2 of Transcription intermediary factor 1-beta IPI>IPI00312128.3>S51>Trim28 Isoform 1 of Transcription intermediary factor 1-beta IPI>IPI00453895.3>S51…	K.RPAASSAAAASAAASS*PAGGGGEAQELLEHCGVCR.E	S51*	UNI:Q62318	1.21889	0.0366099	1.6484e+07	1.6484e+07	11735572	20734787	16993845	16471863	1.35238e+07	10378697	15460389	12720317	15535646	856.887	0.353918	37.05	8.93947	0.746029	4	0		3183181	Transcription intermediary factor 1-beta (TIF1-beta) (Tripartite motif protein 28) (KRAB-A interacting protein) (KRIP-1)	Q62318	TIF1B_MOUSE		370352	0.353918	F	37.05	nucleus	protein amino acid phosphorylation	protein binding
1959178	Eukaryotic translation initiation factor 5B	Manual Assigned Name:Eukaryotic translation initiation factor 5B SwissPROT>IF2P_MOUSE>S215>Eukaryotic translation initiation factor 5B OS=Mus musculus GN=Eif5b IPI>Q05D44>S215>Eukaryotic translation initiation factor 5B IPI>IPI00756424.3>S215>Eif5b Eukaryotic translation initiation factor 5B NCBI>215275645>S215>RecName: Full=Eukaryotic translation initiation factor 5B; Short=eIF-5B; AltName: Full…	K.SVPTVDS*GNEDDDSSFK.I	S215*	UNI:Q05D44	1.21659	0.0435864	2.70696e+07	2.70696e+07	16558692	32380510	32815063	26524048	2.22504e+07	12244271	23548082	26184648	27024712	943.875	0.0413411	89.67	46.8588	0.900535	2	0		215275645	RecName: Full=Eukaryotic translation initiation factor 5B; Short=eIF-5B; AltName: Full=Translation initiation factor IF-2	Q05D44	IF2P_MOUSE		385908	0.0413411	F	89.67	cytoplasm	translation	protein binding
1959083	Heterogeneous nuclear ribonucleoprotein H	Manual Assigned Name:Heterogeneous nuclear ribonucleoprotein H HPRD>03021_1>T107>Heterogeneous nuclear ribonucleoprotein H1 HPRD>03022_1>T107>Heterogeneous nuclear ribonucleoprotein H2 HPRD>03022_2>T107>Heterogeneous nuclear ribonucleoprotein H2 SwissPROT>HNRH1_MOUSE>T107>Heterogeneous nuclear ribonucleoprotein H OS=Mus musculus GN=Hnrnph1 SwissPROT>HNRH2_MOUSE>T107>Heterogeneous nuclear ribonucl…	K.HTGPNSPDT*ANDGFVR.L	T107*	UNI:O35737	1.21521	0.0378692	2.05485e+06	2.05485e+06	3060584	2303768	1473311	1381737	1.69095e+06	2565952	1709247	1140778	1347820	882.871	0.735521	22.47	11.1171	0.822831	2	0		46577330	Heterogeneous nuclear ribonucleoprotein H' (hnRNP H')	O35737	Q8C2Q7_MOUSE	03022_2	387964	0.735521	F	22.47	nucleus ribonucleoprotein complex	mRNA processing nuclear mRNA splicing, via spliceosome regulation of transcription, DNA-dependent RNA processing	protein binding nucleotide binding
1959713	Heterogeneous nuclear ribonucleoprotein H	Manual Assigned Name:Heterogeneous nuclear ribonucleoprotein H HPRD>03021_1>S104>Heterogeneous nuclear ribonucleoprotein H1 HPRD>03022_1>S104>Heterogeneous nuclear ribonucleoprotein H2 HPRD>03022_2>S104>Heterogeneous nuclear ribonucleoprotein H2 SwissPROT>HNRH1_MOUSE>S104>Heterogeneous nuclear ribonucleoprotein H OS=Mus musculus GN=Hnrnph1 SwissPROT>HNRH2_MOUSE>S104>Heterogeneous nuclear ribonucl…	K.HTGPNS*PDTANDGFVR.L	S104*	UNI:O35737	1.21521	0.0378692	2.05485e+06	2.05485e+06	3060584	2303768	1473311	1381737	1.69095e+06	2565952	1709247	1140778	1347820	882.871	0.457859	70.6	34.0324	0.802721	2	0		46577330	Heterogeneous nuclear ribonucleoprotein H' (hnRNP H')	O35737	Q8C2Q7_MOUSE	03022_2	387964	0.457859	F	70.6	nucleus ribonucleoprotein complex	mRNA processing nuclear mRNA splicing, via spliceosome regulation of transcription, DNA-dependent RNA processing	protein binding nucleotide binding
1958728	Heterogeneous nuclear ribonucleoprotein U-like protein 2	Manual Assigned Name:Heterogeneous nuclear ribonucleoprotein U-like protein 2 SwissPROT>HNRL2_MOUSE>Heterogeneous nuclear ribonucleoprotein U-like protein 2 OS=Mus musculus GN=Hnrnpul2 SwissPROT>Q8BIQ7_MOUSE>Putative uncharacterized protein OS=Mus musculus GN=Hnrpul2 SwissPROT>Q8BIY6_MOUSE>Putative uncharacterized protein OS=Mus musculus GN=Arhgap26 IPI>Q00PI9>Heterogeneous nuclear ribonucleoprot…	R.S*GDETPGSEAPGDK.A	S159	UNI:Q00PI9	1.21518	0.0345487	5.37862e+06	5.37862e+06	3675445	5928145	6448173	5462721	4.4262e+06	2910878	4572945	4907501	5313489	713.772	0.814561	60.4	61.5836	0.834967	2	0		123778087	Heterogeneous nuclear ribonucleoprotein U-like protein 2 (MLF1-associated nuclear protein)	Q00PI9	HNRL2_MOUSE		386142	0.127582	F	60.4	nucleus intracellular	biological_process signal transduction	protein binding nucleic acid binding
1959309	Serine/arginine repetitive matrix protein 2	Manual Assigned Name:Serine/arginine repetitive matrix protein 2 SwissPROT>SRRM2_MOUSE>S2351>Isoform 3 of Serine/arginine repetitive matrix protein 2 OS=Mus musculus GN=Srrm2 IPI>Q8BTI8>S2351>Serine/arginine repetitive matrix protein 2 IPI>Q8BTI8-2>S2351>Isoform 2 of Serine/arginine repetitive matrix protein 2 IPI>Q8BTI8-3>S2351>Isoform 3 of Serine/arginine repetitive matrix protein 2 IPI>IPI0022…	R.TS*PLMLDR.A	S2351	UNI:Q8BTI8	1.21412	0.0292727	2.11354e+07	2.11354e+07	20635917	23409045	20509901	19986687	1.7408e+07	15916336	18252753	16599586	18863326	511.735	1.76828	46.16	10.9187	0.98184	2	0		341942108	RecName: Full=Serine/arginine repetitive matrix protein 2	Q8BTI8	SRRM2_MOUSE		392144	0.442071	F	46.16	nucleus	mRNA processing	protein binding
1959074	Brain-specific angiogenesis inhibitor 1-associated protein 2	Manual Assigned Name:Brain-specific angiogenesis inhibitor 1-associated protein 2 HPRD>05686_1>S366>BAI1 associated protein 2 HPRD>05686_2>S366>BAI1 associated protein 2 HPRD>05686_3>S366>BAI1 associated protein 2 SwissPROT>B1AZ46_MOUSE>S367>Brain-specific angiogenesis inhibitor 1-associated protein 2 OS=Mus musculus GN=Baiap2 SwissPROT>BAIP2_MOUSE>S327>Isoform 4 of Brain-specific angiogenesis in…	R.SSS*MAAGLER.N	S367	UNI:B1AZ46	1.21402	0.0246184	4.548e+06	4.548e+06	3536740	6328736	4144260	4182274	3.74624e+06	2815539	5612515	3448226	3108680	549.73	0.671854	61.15	30.193	0.875335	2	0		73917637	Brain-specific angiogenesis inhibitor 1-associated protein 2 (BAI1-associated protein 2) (BAI-associated protein 2) (Insulin receptor tyrosine kinase 53 kDa substrate) (Insulin receptor substrate p53) (Insulin receptor substrate protein of 53 kDa) (IRSp53)	B1AZ46	BAIP2_MOUSE	05686_3	373840	0.225772	F	61.15	membrane nuclear pore cytoskeleton nucleus integral to membrane	signal transduction	protein binding SH3 domain binding	Regulation of actin cytoskeleton Adherens junction
1959075	Brain-specific angiogenesis inhibitor 1-associated protein 2	Manual Assigned Name:Brain-specific angiogenesis inhibitor 1-associated protein 2 HPRD>05686_1>S365>BAI1 associated protein 2 HPRD>05686_2>S365>BAI1 associated protein 2 HPRD>05686_3>S365>BAI1 associated protein 2 SwissPROT>B1AZ46_MOUSE>S366>Brain-specific angiogenesis inhibitor 1-associated protein 2 OS=Mus musculus GN=Baiap2 SwissPROT>BAIP2_MOUSE>S326>Isoform 4 of Brain-specific angiogenesis in…	R.SS*SMAAGLER.N	S366	UNI:B1AZ46	1.21402	0.0246184	4.548e+06	4.548e+06	3536740	6328736	4144260	4182274	3.74624e+06	2815539	5612515	3448226	3108680	544.726	0.760718	56.25		0.896234	2	0		73917637	Brain-specific angiogenesis inhibitor 1-associated protein 2 (BAI1-associated protein 2) (BAI-associated protein 2) (Insulin receptor tyrosine kinase 53 kDa substrate) (Insulin receptor substrate p53) (Insulin receptor substrate protein of 53 kDa) (IRSp53)	B1AZ46	BAIP2_MOUSE	05686_3	373840	0.54022	F	56.25	membrane nuclear pore cytoskeleton nucleus integral to membrane	signal transduction	protein binding SH3 domain binding	Regulation of actin cytoskeleton Adherens junction
1959149	Papillary renal cell carcinoma (Translocation-associated)	Manual Assigned Name:Papillary renal cell carcinoma (Translocation-associated) SwissPROT>Q05CA9_MOUSE>S157S159>Prcc protein (Fragment) OS=Mus musculus GN=Prcc SwissPROT>Q9EQC8_MOUSE>S157S159>Papillary renal cell carcinoma (Translocation-associated) OS=Mus musculus GN=Prcc IPI>Q9EQC8>S157S159>Papillary renal cell carcinoma (Translocation-associated) IPI>IPI00808201.1>S157S159>Prcc Prcc protein (Fr…	R.IAAPELQKGDS*DS*EEDEPAK.K	S157S159	UNI:Q9EQC8	1.21357	0.0264414	1.04325e+07	1.04325e+07	7357068	14493662	9573003	10306334	8.59654e+06	5532794	11621665	7792359	9439323	763.644	1.5077	35.68	100	0.380498	3	0		11527239	papillary renal cell carcinoma-associated protein [Mus musculus]	Q9EQC8	Q9EQC8_MOUSE		370272	1.5077	F	35.68
1959588	Microtubule-associated protein 1A	Manual Assigned Name:Microtubule-associated protein 1A SwissPROT>A2ARP8_MOUSE>S2841T2843>Microtubule-associated protein 1 A OS=Mus musculus GN=Mtap1a SwissPROT>MAP1A_MOUSE>S2827T2829>Isoform 2 of Microtubule-associated protein 1A OS=Mus musculus GN=Map1a IPI>Q9QYR6>S2603T2605>Microtubule-associated protein 1A IPI>A2ARP8>S2603T2605>Microtubule-associated protein 1 A IPI>Q9QYR6-2>S2603T2605>Isoform…	K.RS*PT*PGKGPVDR.T	S2603T2605	UNI:Q9QYR6	1.21292	0.0268838	546797	546797	437896	652341	786816	310135	450811	324632	506255	715939	256420	476.213	0.8811	24.83	100	0.283537	3	0		122065442	Microtubule-associated protein 1A (MAP 1A)	Q9QYR6	MAP1A_MOUSE			0.8811	F	24.83	microtubule cytosol	negative regulation of microtubule depolymerization sensory perception of sound	protein binding
1958676	Yorkie homolog	Manual Assigned Name:Yorkie homolog HPRD>09424_1>Yes associated protein SwissPROT>Q3U046_MOUSE>Putative uncharacterized protein (Fragment) OS=Mus musculus GN=Yap1 SwissPROT>YAP1_MOUSE>Isoform 2 of Yorkie homolog OS=Mus musculus GN=Yap1 IPI>P46938>Yorkie homolog IPI>P46938-2>Isoform 2 of Yorkie homolog IPI>IPI00108989.4>Yap1 Isoform 1 of Yorkie homolog IPI>IPI00621717.2>Yap1 Isoform 2 of Yorkie ho…	R.GDSET*DLEALFNAVMNPK.T	T48	UNI:P46938	1.21126	0.0246184	1.33952e+07	1.33952e+07	13500417	15259104	11426156		1.10589e+07	11517600	12529345	9129797		680.301	1.62932	26.91	12.1312	0.786817	3	0		294862480	RecName: Full=Yorkie homolog; AltName: Full=65 kDa Yes-associated protein; Short=YAP65	P46938	YAP1_MOUSE	9424	385548	0.0107902	F	26.91	nucleus transcription factor complex	regulation of transcription positive regulation of transcription from RNA polymerase II promoter regulation of transcription, DNA-dependent protein amino acid phosphorylation	protein binding
1958806	Exocyst complex component 1	Manual Assigned Name:Exocyst complex component 1 HPRD>07615_1>S470>Exocyst complex component 1 HPRD>07615_2>S455>Exocyst complex component 1 HPRD>07615_3>S470>Exocyst complex component 1 SwissPROT>EXOC1_MOUSE>S470>Exocyst complex component 1 OS=Mus musculus GN=Exoc1 SwissPROT>Q5PPR2_MOUSE>S455>Exocyst complex component 1 OS=Mus musculus GN=Exoc1 SwissPROT>Q6P1Y9_MOUSE>S477>Exocyst complex compone…	K.LTGS*TSSLNK.L	S455	UNI:Q5PPR2	1.2091	0.0386766	327640	327640	333469	343877	279647	353567	270979	296563	312431	231463	243458	544.256	1.13839	40.29	16.9461	0.842153	2	0		24418669	Exocyst complex component Sec3	Q5PPR2	SEC3_MOUSE	07615_3	379998	1.13839	F	40.29	secretory granule exocyst	transport	protein binding molecular_function
1960394	Serine/arginine repetitive matrix 1	Manual Assigned Name:Serine/arginine repetitive matrix 1 SwissPROT>A2A8V8_MOUSE>S878>Serine/arginine repetitive matrix 1 OS=Mus musculus GN=Srrm1 SwissPROT>A2A8V9_MOUSE>S887>Serine/arginine repetitive matrix 1 OS=Mus musculus GN=Srrm1 IPI>A2A8V8>S878>Serine/arginine repetitive matrix 1 IPI>A2A8V9>S878>Serine/arginine repetitive matrix 1 IPI>Q52KI8>S878>Serine/arginine repetitive matrix protein 1 …	R.KETES*EAEDDNLDDLER.H	S878	UNI:A2A8V8	1.20863	0.0465352	2.12195e+06	2.12195e+06	2028009	2405598	1585588	2468588	1.75566e+06	1363435	1883910	1264213	2511086	1044.42	0.307497	100.36	25.5751	0.972598	2	0		347595715	RecName: Full=Serine/arginine repetitive matrix protein 1; AltName: Full=Plenty-of-prolines 101	A2A8V8	A2A8V9_MOUSE			0.307497	F	100.36	nucleus	mRNA processing	DNA binding zinc ion binding
1958950	Rho GTPase activating protein 1	Manual Assigned Name:Rho GTPase activating protein 1 SwissPROT>A2AGT9_MOUSE>S91>Rho GTPase activating protein 1 OS=Mus musculus GN=Arhgap1 SwissPROT>RHG01_MOUSE>S51>Rho GTPase-activating protein 1 OS=Mus musculus GN=Arhgap1 IPI>A2AH25>S91>Rho GTPase activating protein 1 IPI>Q5FWK3>S91>Rho GTPase-activating protein 1 IPI>IPI00404970.2>S91>Arhgap1 Rho GTPase-activating protein 1 IPI>IPI00224070.2>S…	K.SSS*PEPVTHLK.W	S91	UNI:A2AH25	1.20699	0.0113981	3.00936e+06	3.00936e+06	2630098	3576454	3321587	2509319	2.49327e+06	2255396	2901316	2683643	2132729	421.199	0.0887774	29.02	27.4269	0.890559	3	0		81882902	Rho GTPase-activating protein 1 (Rho-type GTPase-activating protein 1)	A2AH25	RHG01_MOUSE		385026	0.0887774	F	29.02	cytoplasm intracellular	signal transduction	protein binding zinc ion binding
1958653	CLIP-associating protein 1	Manual Assigned Name:CLIP-associating protein 1 HPRD>09322_1>T796>CLIP associated protein 1 IPI>Q80TV8>T793>CLIP-associating protein 1 IPI>IPI00672213.3>T793>Clasp1 CLIP-associating protein 1 isoform 1 IPI>IPI00880482.1>T793>Clasp1 CLIP-associating protein 1 isoform 2 IPI>E9Q6L0>T793>Uncharacterized protein IPI>E9QKH0>T793>Uncharacterized protein NCBI>124007127>T793>CLIP-associating protein 1 (Cy…	R.VLST*STDLEAAVADALK.K	T793*	UNI:Q80TV8	1.20636	0.0285086	3.36169e+06	3.36169e+06	3768016	4405169	1911883		2.78664e+06	2964581	3842802	1552549		597.967	0.676383	29.83	15.1415	0.787235	3	0		124007127	CLIP-associating protein 1 (Cytoplasmic linker-associated protein 1) [MASS=169226]	Q80TV8	CLAP1_MOUSE	09322_1	374249	0.550816	F	29.83	cytoplasm	cell cycle	protein binding
1959236	Serine/arginine repetitive matrix protein 2	Manual Assigned Name:Serine/arginine repetitive matrix protein 2 SwissPROT>SRRM2_MOUSE>S1360>Isoform 3 of Serine/arginine repetitive matrix protein 2 OS=Mus musculus GN=Srrm2 IPI>Q8BTI8>S1360>Serine/arginine repetitive matrix protein 2 IPI>Q8BTI8-2>S1360>Isoform 2 of Serine/arginine repetitive matrix protein 2 IPI>Q8BTI8-3>S1360>Isoform 3 of Serine/arginine repetitive matrix protein 2 IPI>IPI0022…	K.VSS*PVLETVQQR.T	S1360	UNI:Q8BTI8	1.20518	0.0351547	4.2049e+07	4.2049e+07	45640890	49770260	40919797	31864980	3.48903e+07	34760095	40599947	33142224	31059072	474.905	0.167991	40.31	25.5751	0.953684	3	0		341942108	RecName: Full=Serine/arginine repetitive matrix protein 2	Q8BTI8	SRRM2_MOUSE		392144	0.167991	F	40.31	nucleus	mRNA processing	protein binding
1958985	28 kDa heat- and acid-stable phosphoprotein	Manual Assigned Name:28 kDa heat- and acid-stable phosphoprotein SwissPROT>HAP28_MOUSE>S57S63>28 kDa heat- and acid-stable phosphoprotein OS=Mus musculus GN=Pdap1 IPI>Q3UHX2>S57S63>28 kDa heat- and acid-stable phosphoprotein IPI>IPI00352475.3>S57S63>Pdap1 28 kDa heat- and acid-stable phosphoprotein NCBI>84029300>S57S63>28 kDa heat- and acid-stable phosphoprotein (PDGF-associated protein) (PAP) (P…	K.S*LDSDES*EDEDDDYQQK.R	S57S63*	UNI:Q3UHX2	1.20483	0.0264414	3.6167e+06	3.6167e+06	1122892	3853889	5099181	4390851	3.00184e+06	808204	3114699	4172677	3911789	1089.35	0.294807	68.36	75.0997	0.936832	2	0		84029300	28 kDa heat- and acid-stable phosphoprotein (PDGF-associated protein) (PAP) (PDGFA-associated protein 1) (PAP1)	Q3UHX2	HAP28_MOUSE		375809	0.0697986	F	68.36
1959675	28 kDa heat- and acid-stable phosphoprotein	Manual Assigned Name:28 kDa heat- and acid-stable phosphoprotein SwissPROT>HAP28_MOUSE>S60S63>28 kDa heat- and acid-stable phosphoprotein OS=Mus musculus GN=Pdap1 IPI>Q3UHX2>S60S63>28 kDa heat- and acid-stable phosphoprotein IPI>IPI00352475.3>S60S63>Pdap1 28 kDa heat- and acid-stable phosphoprotein NCBI>84029300>S60S63>28 kDa heat- and acid-stable phosphoprotein (PDGF-associated protein) (PAP) (P…	K.SLDS*DES*EDEDDDYQQK.R	S60S63*	UNI:Q3UHX2	1.20483	0.0264414	3.6167e+06	3.6167e+06	1122892	3853889	5099181	4390851	3.00184e+06	808204	3114699	4172677	3911789	1089.35	0.15521	43.64	9.51092	0.787649	2	0		84029300	28 kDa heat- and acid-stable phosphoprotein (PDGF-associated protein) (PAP) (PDGFA-associated protein 1) (PAP1)	Q3UHX2	HAP28_MOUSE		375809	0.15521	F	43.64
1959165	Glycogen synthase kinase-3 beta	Manual Assigned Name:Glycogen synthase kinase-3 beta HPRD>05418_1>Y216>Glycogen synthase kinase 3 beta HPRD>06002_1>Y279>Glycogen synthase kinase 3 alpha SwissPROT>D3Z7E5_MOUSE>Y279>Uncharacterized protein OS=Mus musculus GN=Gsk3a SwissPROT>GSK3A_MOUSE>Y279>Glycogen synthase kinase-3 alpha OS=Mus musculus GN=Gsk3a SwissPROT>GSK3B_MOUSE>Y216>Glycogen synthase kinase-3 beta OS=Mus musculus GN=Gsk3b…	R.GEPNVSY*ICSR.Y	Y216*	UNI:Q9WV60	1.20467	0.0331635	5.80754e+07	5.80754e+07	45944564	68230940	61443792	56682155	4.82084e+07	36822488	54298909	47052806	54659383	686.286	0.60369	28.16	27.6042	0.931675	2	0		11133187	Glycogen synthase kinase-3 beta (GSK-3 beta)	Q9WV60	GSK3B_MOUSE	06002_1	372943	0.158943	F	28.16	cytosol cytoplasm nucleus intracellular	protein amino acid phosphorylation	protein binding ATP binding	Alzheimer's disease Wnt signaling pathway Hedgehog signaling pathway Melanogenesis Pathways in cancer Basal cell carcinoma Insulin signaling pathway Focal adhesion Chemokine signaling pathway ErbB signaling pathway T cell receptor signaling pathway B cell receptor signaling pathway Neurotrophin signaling pathway Colorectal cancer Endometrial cancer Prostate cancer Cell cycle Axon guidance Circadi…
1958917	Pleckstrin homology-like domain family B member 1	Manual Assigned Name:Pleckstrin homology-like domain family B member 1 HPRD>15128_1>S563>Pleckstrin homology like domain family B, member 1 SwissPROT>D3Z0X5_MOUSE>S565>Uncharacterized protein OS=Mus musculus GN=Phldb1 SwissPROT>D3Z4N0_MOUSE>S565>Uncharacterized protein OS=Mus musculus GN=Phldb1 SwissPROT>PHLB1_MOUSE>S565>Isoform 2 of Pleckstrin homology-like domain family B member 1 OS=Mus muscul…	R.KLS*SGDLR.V	S565	UNI:Q6PDH0	1.20404	0.0246184	2.26944e+06	2.26944e+06	2423530	2236866	2176093	2241273	1.88486e+06	1842069	1998267	1822501	1876583	478.234	0.263747	20.18	10.7918	0.511535	2	0		81892500	Pleckstrin homology-like domain family B member 1 (Protein LL5-alpha)	Q6PDH0	PHLB1_MOUSE	15128_1	378735	0.263747	F	20.18
1958875	Transcriptional regulator ATRX	Manual Assigned Name:Transcriptional regulator ATRX SwissPROT>A2ADH4_MOUSE>Alpha thalassemia/mental retardation syndrome X-linked homolog (Human) OS=Mus musculus GN=Atrx SwissPROT>A6PWK7_MOUSE>Alpha thalassemia/mental retardation syndrome X-linked homolog (Human) (Fragment) OS=Mus musculus GN=Atrx SwissPROT>A6PWK8_MOUSE>Alpha thalassemia/mental retardation syndrome X-linked homolog (Human) (Fragm…	K.YVES*DDEKPTDENVNEK.A	S92*	UNI:Q61687	1.20288	0.0311819	3.20328e+06	3.20328e+06	1826006	4103843	3630531	3252741	2.66301e+06	1382054	3179071	3027780	3063119	702.962	0.375913	30.45	28.8106	0.869036	3	0		341940583	RecName: Full=Transcriptional regulator ATRX; AltName: Full=ATP-dependent helicase ATRX; AltName: Full=HP1 alpha-interacting protein; AltName: Full=HP1-BP38 protein; AltName: Full=Heterochromatin protein 2; AltName: Full=X-linked nuclear protein	Q61687	ATRX_MOUSE		376488	0.375913	F	30.45	nucleus oligosaccharyltransferase complex nucleolus	DNA repair transmembrane transport proteolysis forebrain development	protein binding
1959731	182 kDa tankyrase-1-binding protein	Manual Assigned Name:182 kDa tankyrase-1-binding protein HPRD>06164_1>S1620S1621>Tankyrase 1 binding protein 182KD SwissPROT>TB182_MOUSE>S1611S1612>182 kDa tankyrase-1-binding protein OS=Mus musculus GN=Tnks1bp1 IPI>P58871>S1611S1612>182 kDa tankyrase-1-binding protein IPI>IPI00459443.5>S1611S1612>Tnks1bp1 182 kDa tankyrase-1-binding protein NCBI>150387848>S1611S1612>182 kDa tankyrase 1-binding p…	R.VPS*S*DEEVVEEPQSR.R	S1611S1612*	UNI:P58871	1.20285	0.0434125	4.2698e+06	4.2698e+06	2899617	5885541	5628137	2665910	3.54973e+06	1893685	4891849	4978117	2435260	616.242	1.46314	23.09	66.2405	0.848426	3	0		150387848	182 kDa tankyrase 1-binding protein [MASS=181824]	P58871	TB182_MOUSE	06164_1	379763	1.46314	F	23.09	nucleus	regulation of Rab GTPase activity telomere maintenance via telomerase	GTPase activator activity protein binding
1960065	Serine/threonine-protein kinase PRP4 homolog	Manual Assigned Name:Serine/threonine-protein kinase PRP4 homolog HPRD>09087_1>T847>PRP4 pre-mRNA processing factor 4 homolog B HPRD>09087_2>T847>PRP4 pre-mRNA processing factor 4 homolog B SwissPROT>B2RUN6_MOUSE>T847>PRP4 pre-mRNA processing factor 4 homolog B (Yeast) OS=Mus musculus GN=Prpf4b SwissPROT>PRP4B_MOUSE>T847>Serine/threonine-protein kinase PRP4 homolog OS=Mus musculus GN=Prpf4b IPI>Q…	K.LCDFGSASHVADNDIT*PYLVSR.F	T847*	UNI:Q61136	1.2022	0.0285086	1.16973e+07	1.16973e+07	11716398	14098288	8242550	12731848	9.72992e+06	9276809	11750308	6118789	11773783	843.045	0.723748	26.13		0.777545	3	0		341942183	RecName: Full=Serine/threonine-protein kinase PRP4 homolog; AltName: Full=PRP4 pre-mRNA-processing factor 4 homolog; AltName: Full=Pre-mRNA protein kinase	Q61136	PRP4B_MOUSE	09087_2	372307	0.723748	F	26.13	nucleus chromosome	protein amino acid phosphorylation	protein binding
1959491	Ras-related GTP-binding protein C	Manual Assigned Name:Ras-related GTP-binding protein C HPRD>12198_1>T96>Ras related GTP binding C HPRD>12199_1>T97>Ras related GTP binding D SwissPROT>RRAGC_MOUSE>T95>Isoform 2 of Ras-related GTP-binding protein C OS=Mus musculus GN=Rragc IPI>Q99K70>T95>Ras-related GTP-binding protein C IPI>Q99K70-2>T95>Isoform 2 of Ras-related GTP-binding protein C IPI>IPI00463574.1>T95>Rragc Isoform 2 of Ras-re…	K.MSPNETLFLEST*NK.I	T95*	UNI:Q99K70	1.20086	0.0420618	6.26571e+07	6.26571e+07	48933383	103924705	56976503	40793949	5.21768e+07	37494917	83563470	46469236	41179689	845.873	0.74642	82.54	16.9461	0.954802	2	0		81880094	Ras-related GTP-binding protein C (Rag C) (GTPase-interacting protein 2) (TIB929)	Q99K70	RRAGC_MOUSE	12199_1	375320	0.162884	F	82.54	nucleus	apoptosis transcription immune response	protein binding
1958867	Serine/arginine repetitive matrix protein 2	Manual Assigned Name:Serine/arginine repetitive matrix protein 2 SwissPROT>SRRM2_MOUSE>S1972T1974>Isoform 3 of Serine/arginine repetitive matrix protein 2 OS=Mus musculus GN=Srrm2 IPI>Q8BTI8>S1972T1974>Serine/arginine repetitive matrix protein 2 IPI>Q8BTI8-2>S1972T1974>Isoform 2 of Serine/arginine repetitive matrix protein 2 IPI>Q8BTI8-3>S1972T1974>Isoform 3 of Serine/arginine repetitive matrix p…	R.S*RT*PPAIR.R	S1972T1974	UNI:Q8BTI8	1.19989	0.0433812	7.65854e+06	7.65854e+06	4566987	9270703	8898175	7898306	6.38272e+06	3698882	7028472	6791744	8011778	353.158	0.654399	22.61	100	0.568431	3	0		341942108	RecName: Full=Serine/arginine repetitive matrix protein 2	Q8BTI8	SRRM2_MOUSE		392144	0.0501201	F	22.61	nucleus	mRNA processing	protein binding
1959027	Choline-phosphate cytidylyltransferase A	Manual Assigned Name:Choline-phosphate cytidylyltransferase A HPRD>00438_1>S315>Phosphate cytidylyltransferase 1 choline alpha isoform SwissPROT>PCY1A_MOUSE>S315>Choline-phosphate cytidylyltransferase A OS=Mus musculus GN=Pcyt1a IPI>P49586>S315>Choline-phosphate cytidylyltransferase A IPI>IPI00115490.1>S315>Pcyt1a Choline-phosphate cytidylyltransferase A NCBI>1345856>S315>Cholinephosphate cytidyl…	R.MLQAIS*PK.Q	S315*	UNI:P49586	1.1994	0.0406255	3.99096e+07	3.99096e+07	44223578	49025409	37480248	28909016	3.32747e+07	32752407	39289836	32821128	28235354	484.238	0.049614	53.04	100	0.732065	2	0		1345856	Cholinephosphate cytidylyltransferase A (Phosphorylcholine transferase A) (CTP:phosphocholine cytidylyltransferase A) (CT A) (CCT A) (CCT-alpha)	P49586	PCY1A_MOUSE	00438_1	388568	0.049614	F	53.04	membrane membrane fraction cytoskeleton	biosynthetic process	catalytic activity	Glycerophospholipid metabolism Phosphonate and phosphinate metabolism
1959302	Hepatoma-derived growth factor	Manual Assigned Name:Hepatoma-derived growth factor SwissPROT>E0CXA0_MOUSE>S96S101>Uncharacterized protein OS=Mus musculus GN=Hdgf SwissPROT>HDGF_MOUSE>S128S133>Hepatoma-derived growth factor OS=Mus musculus GN=Hdgf IPI>P51859>S128S133>Hepatoma-derived growth factor IPI>IPI00313817.1>S128S133>Hdgf Hepatoma-derived growth factor IPI>E0CXA0>S128S133>Uncharacterized protein IPI>IPI00882349.1>S128S13…	K.GS*AEGSS*DEEGKLVIDEPAK.E	S128S133*	UNI:P51859	1.19911	0.0435299	1.17455e+07	1.17455e+07	7832786	16804901	13567132	8777319	9.79523e+06	6511736	13667612	10152517	8849061	1089.45	0.0312229	22.28	7.56868	0.0354012	2	0		22261803	Hepatoma-derived growth factor (HDGF)	P51859	HDGF_MOUSE		370274	0.0312229	F	22.28	nucleus	regulation of transcription	DNA binding
1959305	Hepatoma-derived growth factor	Manual Assigned Name:Hepatoma-derived growth factor SwissPROT>E0CXA0_MOUSE>S100S101>Uncharacterized protein OS=Mus musculus GN=Hdgf SwissPROT>HDGF_MOUSE>S132S133>Hepatoma-derived growth factor OS=Mus musculus GN=Hdgf IPI>P51859>S132S133>Hepatoma-derived growth factor IPI>IPI00313817.1>S132S133>Hdgf Hepatoma-derived growth factor IPI>E0CXA0>S132S133>Uncharacterized protein IPI>IPI00882349.1>S132S1…	K.GSAEGS*S*DEEGKLVIDEPAK.E	S132S133*	UNI:P51859	1.19911	0.0435299	1.17455e+07	1.17455e+07	7832786	16804901	13567132	8777319	9.79523e+06	6511736	13667612	10152517	8849061	1089.45	0.0312229	49.03	6.41178	0.607876	2	0		22261803	Hepatoma-derived growth factor (HDGF)	P51859	HDGF_MOUSE		370274	0.0312229	F	49.03	nucleus	regulation of transcription	DNA binding
1960013	Hepatoma-derived growth factor	Manual Assigned Name:Hepatoma-derived growth factor SwissPROT>E0CXA0_MOUSE>S96S100>Uncharacterized protein OS=Mus musculus GN=Hdgf SwissPROT>HDGF_MOUSE>S128S132>Hepatoma-derived growth factor OS=Mus musculus GN=Hdgf IPI>P51859>S128S132>Hepatoma-derived growth factor IPI>IPI00313817.1>S128S132>Hdgf Hepatoma-derived growth factor IPI>E0CXA0>S128S132>Uncharacterized protein IPI>IPI00882349.1>S128S13…	K.GS*AEGS*SDEEGKLVIDEPAK.E	S128S132*	UNI:P51859	1.19911	0.0435299	1.17455e+07	1.17455e+07	7832786	16804901	13567132	8777319	9.79523e+06	6511736	13667612	10152517	8849061	1089.45	0.0312229	26.41	5.52842	0.409254	2	0		22261803	Hepatoma-derived growth factor (HDGF)	P51859	HDGF_MOUSE		370274	0.0312229	F	26.41	nucleus	regulation of transcription	DNA binding
1959820	Protein transport protein Sec31A	Manual Assigned Name:Protein transport protein Sec31A IPI>Q3UPL0>S526>Protein transport protein Sec31A IPI>IPI00377592.7>S526>Sec31a SEC31-like 1 IPI>IPI00938457.1>S526>Sec31a Isoform 1 of Protein transport protein Sec31A IPI>IPI00752849.2>S526>Sec31a 67 kDa protein NCBI>152112288>S526>Protein transport protein Sec31A (SEC31-related protein A) (SEC31-like 1) NCBI>244791271>S526>SEC31-like 1 [Mus …	K.DSDQVAQS*DGEESPAAEEQLLGER.I	S526	UNI:Q3UPL0	1.19802	0.0396527	4.05168e+07	4.05168e+07	31126209	60466222	43719519	26755423	3.382e+07	25673962	49220153	33740288	26645447	884.04	1.07807	34.25	28.6378	0.948025	3	0		152112288	Protein transport protein Sec31A (SEC31-related protein A) (SEC31-like 1)	Q3UPL0	SC31A_MOUSE			0.251688	F	34.25	membrane	transport	protein binding
1960054	Protein transport protein Sec31A	Manual Assigned Name:Protein transport protein Sec31A IPI>Q3UPL0>S531>Protein transport protein Sec31A IPI>IPI00377592.7>S531>Sec31a SEC31-like 1 IPI>IPI00938457.1>S531>Sec31a Isoform 1 of Protein transport protein Sec31A IPI>IPI00752849.2>S531>Sec31a 67 kDa protein NCBI>152112288>S531>Protein transport protein Sec31A (SEC31-related protein A) (SEC31-like 1) NCBI>244791271>S531>SEC31-like 1 [Mus …	K.DSDQVAQSDGEES*PAAEEQLLGER.I	S531	UNI:Q3UPL0	1.19802	0.0396527	4.05168e+07	4.05168e+07	31126209	60466222	43719519	26755423	3.382e+07	25673962	49220153	33740288	26645447	880.703	0.270066	24.35	4.02488	0.783725	3	0		152112288	Protein transport protein Sec31A (SEC31-related protein A) (SEC31-like 1)	Q3UPL0	SC31A_MOUSE			0.270066	F	24.35	membrane	transport	protein binding
1959801	Ragulator complex protein LAMTOR1	Manual Assigned Name:Ragulator complex protein LAMTOR1 SwissPROT>CK059_MOUSE>S26>RhoA activator C11orf59 homolog OS=Mus musculus IPI>Q9CQ22>S26>Ragulator complex protein LAMTOR1 IPI>IPI00315187.5>S26>2400001E08Rik RhoA activator C11orf59 homolog NCBI>81903514>S26>UPF0404 protein C11orf59 homolog NCBI>148701279>S26>mCG11722 [Mus musculus] [MASS=17829] NCBI>148684600>S26>mCG6767, isoform CRA_b [Mus…	K.LLLDPS*STPTK.A	S26	UNI:Q9CQ22	1.19779	0.012029	1.38393e+07	1.38393e+07	11606375	19364213	14258203	10128407	1.1554e+07	9341868	16383565	11698372	8792136	626.316	0.693499	20.88	9.0759	0.627226	2	0		81903514	UPF0404 protein C11orf59 homolog	Q9CQ22	CK059_MOUSE		376325	0.693499	F	20.88	plasma membrane	biological_process	protein binding
1960035	Ragulator complex protein LAMTOR1	Manual Assigned Name:Ragulator complex protein LAMTOR1 SwissPROT>CK059_MOUSE>S27>RhoA activator C11orf59 homolog OS=Mus musculus IPI>Q9CQ22>S27>Ragulator complex protein LAMTOR1 IPI>IPI00315187.5>S27>2400001E08Rik RhoA activator C11orf59 homolog NCBI>81903514>S27>UPF0404 protein C11orf59 homolog NCBI>148701279>S27>mCG11722 [Mus musculus] [MASS=17829] NCBI>148684600>S27>mCG6767, isoform CRA_b [Mus…	K.LLLDPSS*TPTK.A	S27	UNI:Q9CQ22	1.19779	0.012029	1.38393e+07	1.38393e+07	11606375	19364213	14258203	10128407	1.1554e+07	9341868	16383565	11698372	8792136	626.316	1.96385	36.58	8.22355	0.706729	2	0		81903514	UPF0404 protein C11orf59 homolog	Q9CQ22	CK059_MOUSE		376325	1.96385	F	36.58	plasma membrane	biological_process	protein binding
1960411	Ragulator complex protein LAMTOR1	Manual Assigned Name:Ragulator complex protein LAMTOR1 SwissPROT>CK059_MOUSE>T28>RhoA activator C11orf59 homolog OS=Mus musculus IPI>Q9CQ22>T28>Ragulator complex protein LAMTOR1 IPI>IPI00315187.5>T28>2400001E08Rik RhoA activator C11orf59 homolog NCBI>81903514>T28>UPF0404 protein C11orf59 homolog NCBI>148701279>T28>mCG11722 [Mus musculus] [MASS=17829] NCBI>148684600>T28>mCG6767, isoform CRA_b [Mus…	K.LLLDPSST*PTK.A	T28	UNI:Q9CQ22	1.19779	0.012029	1.38393e+07	1.38393e+07	11606375	19364213	14258203	10128407	1.1554e+07	9341868	16383565	11698372	8792136	626.316	1.08499	25.7	5.21325	0.545002	2	0		81903514	UPF0404 protein C11orf59 homolog	Q9CQ22	CK059_MOUSE		376325	1.08499	F	25.7	plasma membrane	biological_process	protein binding
1959352	Intersectin-1	Manual Assigned Name:Intersectin-1 HPRD>03898_1>S904>Intersectin 1 HPRD>03898_2>S904>Intersectin 1 SwissPROT>ITSN1_MOUSE>S897>Isoform 2 of Intersectin-1 OS=Mus musculus GN=Itsn1 SwissPROT>Q3TUF4_MOUSE>S313>Putative uncharacterized protein (Fragment) OS=Mus musculus GN=Itsn1 IPI>Q9Z0R4>S897>Intersectin-1 IPI>Q9Z0R4-2>S897>Isoform 2 of Intersectin-1 IPI>IPI00129356.1>S897>Itsn1 Isoform 1 of Interse…	R.SAFTPATATGSSPS*PVLGQGEK.V	S897*	UNI:Q9Z0R4	1.19726	0.0270035	7.05648e+06	7.05648e+06	5166513	9639737	9702287	3717364	5.89386e+06	3950350	8042677	8151371	3431029	1085.51	1.47373	59.43	19.8227	0.571355	2	0		20138800	Intersectin 1 (EH and SH3 domains protein 1)	Q9Z0R4	Q3TUF4_MOUSE	03898_2	373009	0.123502	F	59.43	membrane intracellular lamellipodium	apoptosis endocytosis small GTPase mediated signal transduction cell cycle intracellular signaling cascade	protein binding calcium ion binding
1959798	Intersectin-1	Manual Assigned Name:Intersectin-1 HPRD>03898_1>S901>Intersectin 1 HPRD>03898_2>S901>Intersectin 1 SwissPROT>ITSN1_MOUSE>S894>Isoform 2 of Intersectin-1 OS=Mus musculus GN=Itsn1 SwissPROT>Q3TUF4_MOUSE>S310>Putative uncharacterized protein (Fragment) OS=Mus musculus GN=Itsn1 IPI>Q9Z0R4>S894>Intersectin-1 IPI>Q9Z0R4-2>S894>Isoform 2 of Intersectin-1 IPI>IPI00129356.1>S894>Itsn1 Isoform 1 of Interse…	R.SAFTPATATGS*SPSPVLGQGEK.V	S894*	UNI:Q9Z0R4	1.19726	0.0270035	7.05648e+06	7.05648e+06	5166513	9639737	9702287	3717364	5.89386e+06	3950350	8042677	8151371	3431029	1089.51	0.574834	23.36	9.12045	0.191767	2	0		20138800	Intersectin 1 (EH and SH3 domains protein 1)	Q9Z0R4	Q3TUF4_MOUSE	03898_2	373009	0.574834	F	23.36	membrane intracellular lamellipodium	apoptosis endocytosis small GTPase mediated signal transduction cell cycle intracellular signaling cascade	protein binding calcium ion binding
1959132	Heat shock protein HSP 90-alpha	Manual Assigned Name:Heat shock protein HSP 90-alpha SwissPROT>HS90A_MOUSE>S263>Heat shock protein HSP 90-alpha OS=Mus musculus GN=Hsp90aa1 IPI>P07901>S263>Heat shock protein HSP 90-alpha IPI>IPI00330804.4>S263>Hsp90aa1 Heat shock protein HSP 90-alpha NCBI>1170384>S263>Heat shock protein HSP 90-alpha (HSP 86) (Tumor specific transplantation 86 kDa antigen) (TSTA) NCBI>148686719>S263>mCG14932, iso…	K.ESDDKPEIEDVGS*DEEEEEK.K	S263*	UNI:P07901	1.19641	0.010407	3.12062e+06	3.12062e+06	2215749	4587865	5329467	349386	2.60832e+06	1786952	3917638	4436433	292252	1202.48	0.490028	72.94	86.1512	0.825896	2	0		1170384	Heat shock protein HSP 90-alpha (HSP 86) (Tumor specific transplantation 86 kDa antigen) (TSTA)	P07901	HS90A_MOUSE		372250	0.490028	F	72.94	cytoplasm	protein folding	protein binding	Pathways in cancer Plant-pathogen interaction Progesterone-mediated oocyte maturation Prostate cancer Antigen processing and presentation NOD-like receptor signaling pathway
1960454	Serine/threonine-protein kinase PRP4 homolog	Manual Assigned Name:Serine/threonine-protein kinase PRP4 homolog HPRD>09087_1>Y849>PRP4 pre-mRNA processing factor 4 homolog B HPRD>09087_2>Y849>PRP4 pre-mRNA processing factor 4 homolog B SwissPROT>B2RUN6_MOUSE>Y849>PRP4 pre-mRNA processing factor 4 homolog B (Yeast) OS=Mus musculus GN=Prpf4b SwissPROT>PRP4B_MOUSE>Y849>Serine/threonine-protein kinase PRP4 homolog OS=Mus musculus GN=Prpf4b IPI>Q…	K.LCDFGSASHVADNDITPY*LVSR.F	Y849*	UNI:Q61136	1.18589	0.02673	1.07157e+07	1.07157e+07	11716398	14098288	4316407	12731848	9.03606e+06	9276809	11750308	3343358	11773783	839.709	0.11243	22.98	7.51589	0.758077	3	0		341942183	RecName: Full=Serine/threonine-protein kinase PRP4 homolog; AltName: Full=PRP4 pre-mRNA-processing factor 4 homolog; AltName: Full=Pre-mRNA protein kinase	Q61136	PRP4B_MOUSE	09087_2	372307	0.11243	F	22.98	nucleus chromosome	protein amino acid phosphorylation	protein binding
1958991	mRNA cap guanine-N7 methyltransferase	Manual Assigned Name:mRNA cap guanine-N7 methyltransferase SwissPROT>D3YYS7_MOUSE>S15>Uncharacterized protein OS=Mus musculus GN=Rnmt SwissPROT>D3Z478_MOUSE>S15>Uncharacterized protein OS=Mus musculus GN=Rnmt SwissPROT>D3Z4K1_MOUSE>S15>Uncharacterized protein OS=Mus musculus GN=Rnmt SwissPROT>MCES_MOUSE>S15>Isoform 3 of mRNA cap guanine-N7 methyltransferase OS=Mus musculus GN=Rnmt IPI>Q9D0L8>S15>…	K.ASVASDPES*PPGGNEPAAASGQR.L	S15	UNI:Q9D0L8	1.18567	0.0397405	3.65766e+06	3.65766e+06	2233194	3828033	4287720	4281699	3.0849e+06	1873596	2676089	3839547	3950369	747.992	1.69093	22.9	37.2355	0.817171	3	0		81881162	mRNA cap guanine-N7 methyltransferase (mRNA (guanine-N(7)-)-methyltransferase) (RG7MT1) (mRNA cap methyltransferase)	Q9D0L8	MCES_MOUSE		370726	1.69093	F	22.9	nucleus	mRNA processing	transferase activity
1958607	Utrn utrophin	Manual Assigned Name:Utrn utrophin SwissPROT>O08614_MOUSE>Cytoskeletal protein OS=Mus musculus GN=Utrn IPI>IPI00353420.7>Utrn utrophin IPI>E9Q6R7>Uncharacterized protein NCBI>1934963>cytoskeletal protein [Mus musculus] NCBI>148671566>utrophin [Mus musculus] [MASS=387101] NCBI>110431378>utrophin [Mus musculus] [MASS=392703]	K.AAQAS*LNALNDPIAVEQALQEK.K	S933	UNI:IPI00353420.7	1.18508	0.010407	9.26422e+06	9.26422e+06	8497419	10012904	9310139	9236424	7.81738e+06	7238553	8701353	7673214	7656395	792.061	1.37227	20.54	100	0.853891	3	0		1934963	cytoskeletal protein [Mus musculus]	IPI00353420.7	O08614_MOUSE		387656	1.37227	F	20.54	plasma membrane	neuromuscular junction development	protein binding
1958815	Nolc1 nucleolar and coiled-body phosphoprotein 1 isoform D	Manual Assigned Name:Nolc1 nucleolar and coiled-body phosphoprotein 1 isoform D SwissPROT>Q3TKZ9_MOUSE>Putative uncharacterized protein OS=Mus musculus GN=Nolc1 SwissPROT>Q3UI16_MOUSE>Putative uncharacterized protein OS=Mus musculus GN=Nolc1 SwissPROT>Q6ZQK6_MOUSE>MKIAA0035 protein (Fragment) OS=Mus musculus GN=Nolc1 SwissPROT>Q8CE21_MOUSE>Putative uncharacterized protein OS=Mus musculus GN=Nolc1…	K.AAKES*EEEEEEEETEEK.K	S562	UNI:IPI00719871.1	1.1834	0.0396527	1.3728e+06	1.3728e+06	599282	1502833	1743192	1645885	1.16005e+06	397295	1338199	1417844	1486855	707.613	0.840711	37.56	102.617	0.967719	3	0		148710033	nucleolar and coiled-body phosphoprotein 1, isoform CRA_c [Mus musculus] [MASS=73840]	IPI00719871.1	Q3TKZ9_MOUSE		371023	0.0627115	F	37.56	nucleolus	nucleolus organization lipid transport	protein binding
1959261	Sntb2 protein	Manual Assigned Name:Sntb2 protein HPRD>02491_1>S95>Syntrophin beta 2 HPRD>02491_2>S95>Syntrophin beta 2 SwissPROT>B7ZNU9_MOUSE>S75>Sntb2 protein OS=Mus musculus GN=Sntb2 SwissPROT>SNTB2_MOUSE>S75>Beta-2-syntrophin OS=Mus musculus GN=Sntb2 IPI>B7ZNU9>S75>Sntb2 protein IPI>Q61235>S75>Beta-2-syntrophin IPI>IPI00118895.1>S75>Sntb2 Beta-2-syntrophin IPI>IPI00922961.1>S75>- Sntb2 protein IPI>IPI008493…	R.GLGPPS*PPAPPR.G	S75*	UNI:B7ZNU9	1.18304	0.0343397	2.56735e+07	2.56735e+07	26811194	29679311	19796885	26406576	2.17013e+07	21718135	23623943	15707937	25755205	611.802	0.934077	30.45	100	0.75585	2	0		23822163	Beta-2-syntrophin (59 kDa dystrophin-associated protein A1, basic component 2) (Syntrophin 3) (SNT3) (Syntrophin-like) (SNTL)	B7ZNU9	SNTB2_MOUSE	02491_2	377669	0.132505	F	30.45	membrane synapse	muscle contraction neuromuscular junction development fatty acid metabolic process	protein binding
1959282	Protein bicaudal D homolog 2	Manual Assigned Name:Protein bicaudal D homolog 2 SwissPROT>D3Z390_MOUSE>S503>Uncharacterized protein OS=Mus musculus GN=Bicd2 IPI>Q921C5>S578>Protein bicaudal D homolog 2 IPI>Q921C5-2>S578>Isoform 2 of Protein bicaudal D homolog 2 IPI>D3Z390>S578>Bicaudal D homolog 2 (Drosophila), isoform CRA_a IPI>IPI00267492.4>S578>Bicd2 Isoform 2 of Protein bicaudal D homolog 2 IPI>IPI00274647.3>S578>Bicd2 Is…	R.S*PVLLPK.G	S578	UNI:Q921C5	1.18172	0.0246184	7.97884e+06	7.97884e+06	6640472	9501582	7565106	8208200	6.75192e+06	5491864	7517113	6576273	7422411	421.237	0.251941	40.05	100	0.915066	2	0		34098661	Cytoskeleton-like bicaudal D protein homolog 2	Q921C5	D3Z390_MOUSE		378193	0.251941	F	40.05	cytoplasm Golgi apparatus	transport	protein binding
1959283	Serine/arginine-rich splicing factor 10	Manual Assigned Name:Serine/arginine-rich splicing factor 10 HPRD>05562_1>S133>FUS interacting protein 1 HPRD>05562_2>S133>FUS interacting protein 1 SwissPROT>FUSIP_MOUSE>S133>FUS-interacting serine-arginine-rich protein 1 (TLS-associated protein with Ser-Arg repeats) (TLS-associated protein with SR repeats) (TASR) (TLS-associated serine-arginine protein) (TLS-associated SR protein) (Neural-speci…	R.S*FDYNYR.R	S133*	UNI:Q9R0U0	1.17948	0.0434125	6.90032e+06	6.90032e+06	4695949	8332202	7839410	6733726	5.8503e+06	3508016	6878179	6219786	6795227	522.695	0.247036	23.93	48.7574	0.917138	2	0		47605750	FUS interacting serine-arginine rich protein 1 (TLS-associated protein with Ser-Arg repeats) (TLS-associated protein with SR repeats) (TASR) (TLS-associated serine-arginine protein) (TLS-associated SR protein) (Neural specific SR protein) (Neural-salient serine/arginine-rich protein)	Q9R0U0	SRS10_MOUSE	05562_2	375335	0.247036	F	23.93	nucleus mitochondrion intracellular nucleoplasm cytoplasm	regulation of transcription Ras protein signal transduction regulation of Rab GTPase activity negative regulation of nuclear mRNA splicing, via spliceosome phenylalanyl-tRNA aminoacylation	protein binding nucleotide binding	Spliceosome
1958951	Itsn1 protein	Manual Assigned Name:Itsn1 protein SwissPROT>D3Z6P4_MOUSE>S274>Uncharacterized protein OS=Mus musculus GN=Itsn1 SwissPROT>ITSN1_MOUSE>S335>Isoform 2 of Intersectin-1 OS=Mus musculus GN=Itsn1 SwissPROT>Q6NZJ5_MOUSE>S335>Itsn1 protein OS=Mus musculus GN=Itsn1 IPI>Q6NZJ5>S335>Itsn1 protein IPI>Q9Z0R4>S335>Intersectin-1 IPI>Q9Z0R4-2>S335>Isoform 2 of Intersectin-1 IPI>IPI00129356.1>S335>Itsn1 Isoform…	R.LPEEPSS*EDEQQPEK.K	S335	UNI:Q6NZJ5	1.17916	0.0440881	2.73696e+06	2.73696e+06	2807567	2951596	3223651	1965031	2.32112e+06	2105615	2249605	3135683	1793576	915.381	0.673314	57.36	30.193	0.956082	2	0		20138800	Intersectin 1 (EH and SH3 domains protein 1)	Q6NZJ5	Q6NZJ5_MOUSE		373009	0.0590242	F	57.36	membrane lamellipodium	small GTPase mediated signal transduction	protein binding
1959661	Itsn1 protein	Manual Assigned Name:Itsn1 protein SwissPROT>D3Z6P4_MOUSE>S273>Uncharacterized protein OS=Mus musculus GN=Itsn1 SwissPROT>ITSN1_MOUSE>S334>Isoform 2 of Intersectin-1 OS=Mus musculus GN=Itsn1 SwissPROT>Q6NZJ5_MOUSE>S334>Itsn1 protein OS=Mus musculus GN=Itsn1 IPI>Q6NZJ5>S334>Itsn1 protein IPI>Q9Z0R4>S334>Intersectin-1 IPI>Q9Z0R4-2>S334>Isoform 2 of Intersectin-1 IPI>IPI00129356.1>S334>Itsn1 Isoform…	R.LPEEPS*SEDEQQPEK.K	S334	UNI:Q6NZJ5	1.17916	0.0440881	2.73696e+06	2.73696e+06	2807567	2951596	3223651	1965031	2.32112e+06	2105615	2249605	3135683	1793576	911.374	0.582959	48.68		0.972734	2	0		20138800	Intersectin 1 (EH and SH3 domains protein 1)	Q6NZJ5	Q6NZJ5_MOUSE		373009	0.355703	F	48.68	membrane lamellipodium	small GTPase mediated signal transduction	protein binding
1958956	Thyroid hormone receptor-associated protein 3	Manual Assigned Name:Thyroid hormone receptor-associated protein 3 SwissPROT>Q8BZN7_MOUSE>S243>Putative uncharacterized protein OS=Mus musculus GN=Thrap3 SwissPROT>TR150_MOUSE>S243>Thyroid hormone receptor-associated protein 3 OS=Mus musculus GN=Thrap3 IPI>Q569Z6>S243>Thyroid hormone receptor-associated protein 3 IPI>Q8BZN7>S243>Thyroid hormone receptor associated protein 3 IPI>IPI00556768.1>S243…	R.ASVSDLS*PR.E	S243	UNI:Q569Z6	1.17728	0.0386766	2.00492e+07	2.00492e+07	17700225	25732357	21857131	14907034	1.70301e+07	14668271	20892544	17711068	14848419	511.233	0.491454	69.43	82.8127	0.96768	2	0		81882407	Thyroid hormone receptor-associated protein 3 (Thyroid hormone receptor-associated protein complex 150 kDa component) (Trap150)	Q569Z6	TR150_MOUSE		388931	0.491454	F	69.43	nucleus mediator complex	regulation of transcription transcription from RNA polymerase II promoter	protein binding ATP binding receptor activity
1959379	Rho guanine nucleotide exchange factor 7	Manual Assigned Name:Rho guanine nucleotide exchange factor 7 HPRD>02226_1>S488>Rho guanine nucleotide exchange factor 6 HPRD>05688_1>S497>Rho guanine nucleotide exchange factor 7 HPRD>05688_2>S340>Rho guanine nucleotide exchange factor 7 SwissPROT>ARHG7_MOUSE>S340>Isoform H of Rho guanine nucleotide exchange factor 7 OS=Mus musculus GN=Arhgef7 IPI>Q9ES28>S497>Rho guanine nucleotide exchange fact…	R.MS*GFIYQGK.L	S497*	UNI:Q9ES28	1.17568	0.0351547	1.80458e+07	1.80458e+07	17322690	20203672	17044778	17612202	1.53492e+07	13520468	16952154	13727211	17197016	559.745	0.395178	33.36	58.0006	0.868688	2	0		125987791	Rho guanine nucleotide exchange factor 7 (PAK-interacting exchange factor beta) (Beta-Pix) (p85SPR) [MASS=97055]	Q9ES28	ARHG7_MOUSE	05688_2	376615	0.266432	F	33.36	intracellular cytoplasm	apoptosis small GTPase mediated signal transduction signal transduction regulation of Rho protein signal transduction intracellular signaling cascade	guanyl-nucleotide exchange factor activity protein binding Rho guanyl-nucleotide exchange factor activity	Regulation of actin cytoskeleton Pancreatic cancer
1958771	Ahnak AHNAK nucleoprotein isoform 1	Manual Assigned Name:Ahnak AHNAK nucleoprotein isoform 1 HPRD>14684_2>S5782>AHNAK nucleoprotein (desmoyokin) IPI>IPI00553798.2>S5555>Ahnak AHNAK nucleoprotein isoform 1 IPI>E9Q1H8>S5555>Uncharacterized protein IPI>E9Q616>S5555>Uncharacterized protein NCBI>34766351>S576>AHNAK [Mus musculus] [MASS=68761] NCBI>18204820>S923>AA589382 protein [Mus musculus] NCBI>61743961>S5555>AHNAK nucleoprotein isof…	R.SNS*FSDER.E	S5555	UNI:IPI00553798.2	1.17105	0.0297234	3.3718e+06	3.3718e+06	2019693	3925052	3951195	3591273	2.87931e+06	1531635	3212030	3477809	3295761	516.189	0.195856	41.25	28.945	0.986053	2	0		34766351	AHNAK [Mus musculus] [MASS=68761]	IPI00553798.2		14684_2		0.195856	F	41.25	nucleus	nervous system development	protein binding
1959452	Ahnak AHNAK nucleoprotein isoform 1	Manual Assigned Name:Ahnak AHNAK nucleoprotein isoform 1 HPRD>14684_2>T5824>AHNAK nucleoprotein (desmoyokin) IPI>IPI00553798.2>T5590>Ahnak AHNAK nucleoprotein isoform 1 IPI>E9Q1H8>T5590>Uncharacterized protein IPI>E9Q616>T5590>Uncharacterized protein NCBI>34766351>T611>AHNAK [Mus musculus] [MASS=68761] NCBI>18204820>T958>AA589382 protein [Mus musculus] NCBI>61743961>T5590>AHNAK nucleoprotein isof…	K.FGT*FGGLGSK.S	T5590	UNI:IPI00553798.2	1.1685	0.0329207	7.62526e+06	7.62526e+06	6730877	11321885	6675998	5772277	6.5257e+06	6144244	9403212	5203364	5351991	525.736	0.56356	48.79	55.5226	0.857982	2	0		34766351	AHNAK [Mus musculus] [MASS=68761]	IPI00553798.2		14684_2		0.56356	F	48.79	nucleus	nervous system development	protein binding
1959825	Ahnak AHNAK nucleoprotein isoform 1	Manual Assigned Name:Ahnak AHNAK nucleoprotein isoform 1 HPRD>14684_2>S5830>AHNAK nucleoprotein (desmoyokin) IPI>IPI00553798.2>S5596>Ahnak AHNAK nucleoprotein isoform 1 IPI>E9Q1H8>S5596>Uncharacterized protein IPI>E9Q616>S5596>Uncharacterized protein NCBI>34766351>S617>AHNAK [Mus musculus] [MASS=68761] NCBI>18204820>S964>AA589382 protein [Mus musculus] NCBI>61743961>S5596>AHNAK nucleoprotein isof…	K.FGTFGGLGS*K.S	S5596	UNI:IPI00553798.2	1.1685	0.0329207	7.62526e+06	7.62526e+06	6730877	11321885	6675998	5772277	6.5257e+06	6144244	9403212	5203364	5351991	525.737	1.30228	21.26	22.0412	0.0843699	2	0		34766351	AHNAK [Mus musculus] [MASS=68761]	IPI00553798.2		14684_2		1.30228	F	21.26	nucleus	nervous system development	protein binding
1959128	HIV Tat-specific factor 1 homolog	Manual Assigned Name:HIV Tat-specific factor 1 homolog HPRD>02282_1>S721>TATSF1 IPI>Q8BGC0>S724>HIV Tat-specific factor 1 homolog IPI>IPI00221566.3>S724>Htatsf1 Isoform 1 of HIV Tat-specific factor 1 homolog NCBI>81913100>S724>HIV Tat-specific factor 1 homolog NCBI>90651987>S122>Htatsf1 protein [Mus musculus] NCBI>148710215>S724>HIV TAT specific factor 1, isoform CRA_a [Mus musculus] [MASS=86239]…	K.LFDDS*DER.G	S724*	UNI:Q8BGC0	1.16758	0.0351547	4.17876e+06	4.17876e+06	3799497	5261054	4731030	2923457	3.579e+06	3213330	4311131	3916266	2875284	538.7	0.369753	28.67	100	0.978034	2	0		81913100	HIV Tat-specific factor 1 homolog	Q8BGC0	HTSF1_MOUSE	02282_1	392170	0.0353031	F	28.67	nucleus integral to membrane	regulation of transcription cell growth	protein binding nucleotide binding
1959723	Synapse-associated protein 1	Manual Assigned Name:Synapse-associated protein 1 HPRD>06733_1>T248>Synapse associated protein 1 SwissPROT>SYAP1_MOUSE>T262>Synapse-associated protein 1 OS=Mus musculus GN=Syap1 IPI>Q9D5V6>T262>Synapse-associated protein 1 IPI>IPI00317599.3>T262>Syap1 Synapse-associated protein 1 NCBI>30580527>T262>Synapse associated protein 1 NCBI>148708834>T262>synapse associated protein 1 [Mus musculus] [MASS=…	K.T*PPVVIK.S	T262*	UNI:Q9D5V6	1.16691	0.0246184	2.72499e+07	2.72499e+07	27551646	36980683	41452317	3014908	2.33521e+07	22893606	30126644	37712540	2675540	421.238	0.675011	23.71	100	0.674907	2	0		30580527	Synapse associated protein 1	Q9D5V6	SYAP1_MOUSE	06733_1	376540	0.675011	F	23.71	nucleus	translation carbohydrate phosphorylation female pregnancy	ATP binding calcium ion binding kinase activity
1958828	Serine/threonine-protein kinase B-raf	Manual Assigned Name:Serine/threonine-protein kinase B-raf HPRD>01264_1>S729>B-Raf SwissPROT>BRAF_MOUSE>S292>Isoform 2 of Serine/threonine-protein kinase B-raf OS=Mus musculus GN=Braf SwissPROT>BRAF1_MOUSE>S291>B-Raf proto-oncogene serine/threonine-protein kinase (EC 2.7.1.37) (Fragment) IPI>P28028>S766>Serine/threonine-protein kinase B-raf IPI>P28028-2>S766>Isoform 2 of Serine/threonine-protein …	R.SAS*EPSLNR.A	S766*	UNI:P28028	1.1668	0.0264414	1.01168e+06	1.01168e+06	761122	1164760	1283479	837378	867058	652131	968891	1059837	787373	520.724	0.0692014	51.13	25.2895	0.927118	2	0		122065141	B-Raf proto-oncogene serine/threonine-protein kinase	P28028	BRAF1_MOUSE	01264_1	369950	0.0692014	F	51.13	nucleus membrane	protein amino acid phosphorylation	protein binding ATP binding	Pathways in cancer Insulin signaling pathway Bladder cancer Regulation of actin cytoskeleton Vascular smooth muscle contraction Focal adhesion Chemokine signaling pathway ErbB signaling pathway mTOR signaling pathway Natural killer cell mediated cytotoxicity Neurotrophin signaling pathway Progesterone-mediated oocyte maturation Colorectal cancer Renal cell carcinoma Pancreatic cancer Endometrial …
1959701	Cad protein	Manual Assigned Name:Cad protein HPRD>06437_1>S1859>Glutamine dependent carbamoyl phosphate synthase SwissPROT>B2RQC6_MOUSE>S1859>"Carbamoyl-phosphate synthetase 2, aspartate transcarbamylase, and dihydroorotase OS=Mus musculus GN=Cad" SwissPROT>Q80VF8_MOUSE>S427>Cad-pending protein (Fragment) OS=Mus musculus GN=Cad IPI>B7ZN27>S1859>Cad protein IPI>B2RQC6>S1859>Carbamoyl-phosphate synthetase 2, a…	R.AS*DPGLPAEEPK.E	S1859*	UNI:B7ZN27	1.16666	0.0333459	2.94491e+06	2.94491e+06	3306688	4142482	3336217	994237	2.52422e+06	2561118	3988176	2712585	834996	645.784	1.11734	44.44	100	0.790312	2	0		219518475	Cad protein [Mus musculus] [MASS=235849]	B7ZN27	Q80VF8_MOUSE	06437_1	370917	1.11734	F	44.44	nucleus	metabolic process cellular amino acid metabolic process	ATP binding hydrolase activity	Alanine, aspartate and glutamate metabolism Pyrimidine metabolism
1959015	Serine/arginine repetitive matrix 1	Manual Assigned Name:Serine/arginine repetitive matrix 1 SwissPROT>A2A8V8_MOUSE>S558S560>Serine/arginine repetitive matrix 1 OS=Mus musculus GN=Srrm1 SwissPROT>A2A8V9_MOUSE>S567S569>Serine/arginine repetitive matrix 1 OS=Mus musculus GN=Srrm1 SwissPROT>A2A8W1_MOUSE>S17S19>Serine/arginine repetitive matrix 1 (Fragment) OS=Mus musculus GN=Srrm1 SwissPROT>SRRM1_MOUSE>S572S574>Isoform 2 of Serine/arg…	R.RRS*PS*PAPPPPPPPPPPR.R	S558S560*	UNI:A2A8V8	1.16305	0.04944	2.23478e+07	2.23478e+07	14254586	26290582	28524632	20321513	1.92148e+07	10410658	21642920	24044844	20760740	696.343	0.128892	29.1	100	0.468176	3	0		347595715	RecName: Full=Serine/arginine repetitive matrix protein 1; AltName: Full=Plenty-of-prolines 101	A2A8V8	SRRM1_MOUSE		375402	0.0368948	F	29.1	nucleus	mRNA processing	DNA binding zinc ion binding
1959166	Activating signal cointegrator 1 complex subunit 3-like 1	Manual Assigned Name:Activating signal cointegrator 1 complex subunit 3-like 1 HPRD>03391_1>S225>U5 200kD SwissPROT>Q6P4T2_MOUSE>S225>Activating signal cointegrator 1 complex subunit 3-like 1 OS=Mus musculus GN=Snrnp200 SwissPROT>Q8BYH6_MOUSE>S225>Putative uncharacterized protein OS=Mus musculus GN=Snrnp200 IPI>Q6P4T2>S225>Activating signal cointegrator 1 complex subunit 3-like 1 IPI>IPI00420329.…	R.EEAS*DDDMEGDEAVVR.C	S225*	UNI:Q6P4T2	1.16082	0.0404208	9.20208e+06	9.20208e+06	7264861	11414751	10593202	7535523	7.92724e+06	6206112	9349457	8601645	7551757	923.838	0.627075	75.73	100	0.489202	2	0		123232173	activating signal cointegrator 1 complex subunit 3-like 1 [Mus musculus] [MASS=244545]	Q6P4T2	Q8BYH6_MOUSE	03391_1	370129	0.432129	F	75.73	nucleus ribonucleoprotein complex integral to membrane	mRNA processing RNA splicing G-protein coupled receptor protein signaling pathway	protein binding ATP binding	Spliceosome
1959038	Rab GTPase-binding effector protein 1	Manual Assigned Name:Rab GTPase-binding effector protein 1 SwissPROT>Q5QNU3_MOUSE>S407S410>"Rabaptin, RAB GTPase binding effector protein 1 OS=Mus musculus GN=Rabep1" SwissPROT>Q5QNU4_MOUSE>S367S370>"Rabaptin, RAB GTPase binding effector protein 1 OS=Mus musculus GN=Rabep1" SwissPROT>RABE1_MOUSE>S407S410>Isoform 6 of Rab GTPase-binding effector protein 1 OS=Mus musculus GN=Rabep1 IPI>O35551>S407S…	R.AQS*TDS*LGTSSSLQSK.A	S407S410*	UNI:O35551	1.15971	0.0434125	1.99226e+06	1.99226e+06	1311432	2312159	2821708	1523760	1.71789e+06	988265	2279676	2473778	1129858	878.856	0.209483	54.71	46.6091	0.884701	2	0		47605961	Rab GTPase binding effector protein 1 (Rabaptin-5) (Rabaptin-5alpha)	O35551	RABE1_MOUSE		381442	0.209483	F	54.71	cytoplasm endosome	transport	protein binding growth factor activity	Endocytosis
1959445	Protein phosphatase 1 regulatory subunit 12A	Manual Assigned Name:Protein phosphatase 1 regulatory subunit 12A SwissPROT>MYPT1_MOUSE>Y446>Isoform 2 of Protein phosphatase 1 regulatory subunit 12A OS=Mus musculus GN=Ppp1r12a IPI>Q9DBR7>Y446>Protein phosphatase 1 regulatory subunit 12A IPI>Q9DBR7-2>Y446>Isoform 2 of Protein phosphatase 1 regulatory subunit 12A IPI>IPI00671847.3>Y446>Ppp1r12a Isoform 1 of Protein phosphatase 1 regulatory subun…	K.TGSY*GALAEISASK.E	Y446*	UNI:Q9DBR7	1.1586	0.0333459	5.4545e+06	5.4545e+06	4384242	10239298	4986145	2208318	4.70785e+06	3449168	8722960	4805378	1853890	481.56	0.0949631	34.48	11.9539	0.740303	3	0		281185473	RecName: Full=Protein phosphatase 1 regulatory subunit 12A; AltName: Full=Myosin phosphatase-targeting subunit 1; Short=Myosin phosphatase target subunit 1	Q9DBR7	MYPT1_MOUSE		385473	0.0949631	F	34.48	cytoplasm intracellular membrane-bounded organelle	protein amino acid dephosphorylation	protein binding	Regulation of actin cytoskeleton Vascular smooth muscle contraction Focal adhesion Long-term potentiation
1959341	General vesicular transport factor p115	Manual Assigned Name:General vesicular transport factor p115 SwissPROT>USO1_MOUSE>Isoform 4 of General vesicular transport factor p115 OS=Mus musculus GN=Uso1 SwissPROT>VDP_MOUSE>General vesicular transport factor p115 (Transcytosis associated protein) (TAP) (Vesicle docking protein) (Fragment) IPI>Q9Z1Z0>General vesicular transport factor p115 IPI>Q9Z1Z0-2>Isoform 2 of General vesicular transpor…	K.DLGHPVEEEDES*GDQEDDDDEIDDGDKDQDI.-	S940*	UNI:Q9Z1Z0	1.1579	0.0285086	3.71334e+07	3.71334e+07	5721600	39441834	64770294	38599863	3.20696e+07	5361580	36051636	53478060	33387273	1190.11	0.357873	33.79	100	0.785723	3	0		85681904	General vesicular transport factor p115 (Protein USO1 homolog) (Transcytosis-associated protein) (TAP) (Vesicle-docking protein)	Q9Z1Z0	USO1_MOUSE		375704	0.357873	F	33.79	membrane	transport	protein binding
1959290	Protein SON	Manual Assigned Name:Protein SON SwissPROT>Q811G3_MOUSE>S1723>Son protein (Fragment) OS=Mus musculus GN=Son SwissPROT>SON_MOUSE>S1683>Isoform 2 of Protein SON OS=Mus musculus GN=Son IPI>Q9QX47>S1723>Protein SON IPI>Q9QX47-2>S1723>Isoform 2 of Protein SON IPI>Q9QX47-3>S1723>Isoform 3 of Protein SON IPI>Q9QX47-4>S1723>Isoform 4 of Protein SON IPI>IPI00134457.3>S1723>Son Isoform 1 of Protein SON IPI…	K.ESAQAVAVALS*PK.E	S1723	UNI:Q9QX47	1.15343	0.0333459	2.69019e+07	2.69019e+07	24290290	32996700	28093855	22226928	2.33234e+07	20645371	27520814	23422701	21704822	679.845	0.859657	74.46	156.926	0.900064	2	0		338817942	RecName: Full=Protein SON; AltName: Full=Negative regulatory element-binding protein; Short=NRE-binding protein	Q9QX47	SON_MOUSE		373011	0.13837	F	74.46	nucleus myosin complex	signal transduction anti-apoptosis	protein binding
1959084	Yorkie homolog	Manual Assigned Name:Yorkie homolog HPRD>09424_1>Yes associated protein SwissPROT>Q3U046_MOUSE>Putative uncharacterized protein (Fragment) OS=Mus musculus GN=Yap1 SwissPROT>YAP1_MOUSE>Isoform 2 of Yorkie homolog OS=Mus musculus GN=Yap1 IPI>P46938>Yorkie homolog IPI>P46938-2>Isoform 2 of Yorkie homolog IPI>IPI00108989.4>Yap1 Isoform 1 of Yorkie homolog IPI>IPI00621717.2>Yap1 Isoform 2 of Yorkie ho…	R.QAST*DAGTAGALTPQHVR.A	T95*	UNI:P46938	1.15007	0.0366099	1.30486e+07	1.30486e+07	19366038	13097111	9909529	9821801	1.13459e+07	15781987	11432495	8521659	9647503	620.958	0.17895	35.22		0.61614	3	0		294862480	RecName: Full=Yorkie homolog; AltName: Full=65 kDa Yes-associated protein; Short=YAP65	P46938	YAP1_MOUSE	9424	385548	0.17895	F	35.22	nucleus transcription factor complex	regulation of transcription positive regulation of transcription from RNA polymerase II promoter regulation of transcription, DNA-dependent protein amino acid phosphorylation	protein binding
1960322	Yorkie homolog	Manual Assigned Name:Yorkie homolog HPRD>09424_1>Yes associated protein SwissPROT>Q3U046_MOUSE>Putative uncharacterized protein (Fragment) OS=Mus musculus GN=Yap1 SwissPROT>YAP1_MOUSE>Isoform 2 of Yorkie homolog OS=Mus musculus GN=Yap1 IPI>P46938>Yorkie homolog IPI>P46938-2>Isoform 2 of Yorkie homolog IPI>IPI00108989.4>Yap1 Isoform 1 of Yorkie homolog IPI>IPI00621717.2>Yap1 Isoform 2 of Yorkie ho…	R.QAS*TDAGTAGALTPQHVR.A	S94*	UNI:P46938	1.15007	0.0366099	1.30486e+07	1.30486e+07	19366038	13097111	9909529	9821801	1.13459e+07	15781987	11432495	8521659	9647503	620.958	0.473975	22.1	5.52842	0.373791	3	0		294862480	RecName: Full=Yorkie homolog; AltName: Full=65 kDa Yes-associated protein; Short=YAP65	P46938	YAP1_MOUSE	9424	385548	0.473975	F	22.1	nucleus transcription factor complex	regulation of transcription positive regulation of transcription from RNA polymerase II promoter regulation of transcription, DNA-dependent protein amino acid phosphorylation	protein binding
1959351	Acetyl-coenzyme A synthetase, cytoplasmic	Manual Assigned Name:Acetyl-coenzyme A synthetase, cytoplasmic SwissPROT>A2AQN4_MOUSE>S30>Acyl-CoA synthetase short-chain family member 2 OS=Mus musculus GN=Acss2 SwissPROT>A2AQN5_MOUSE>S30>Acyl-CoA synthetase short-chain family member 2 OS=Mus musculus GN=Acss2 SwissPROT>ACSA_MOUSE>S30>"Acetyl-coenzyme A synthetase, cytoplasmic OS=Mus musculus GN=Acss2" SwissPROT>D6RHA7_MOUSE>S30>Uncharacterized…	R.GWS*PPPEVR.R	S30*	UNI:Q9QXG4	1.15	0.0285086	6.2717e+07	6.2717e+07	67332657	67189181	59199984	57146355	5.45366e+07	55150674	64147944	49803514	49044257	552.748	1.7456	28.92	100	0.887911	2	0		6691151	acetyl-CoA synthetase [Mus musculus]	Q9QXG4	Q8BK97_MOUSE		385364	0.689913	F	28.92	cytoplasm membrane nucleus	metabolic process	ATP binding catalytic activity	Glycolysis / Gluconeogenesis Pyruvate metabolism Propanoate metabolism Reductive carboxylate cycle (CO2 fixation)
1958928	Secreted frizzled-related protein 2	Manual Assigned Name:Secreted frizzled-related protein 2 HPRD>16041_1>S289>Secreted frizzled related protein 2 SwissPROT>SFRP2_MOUSE>S289>Secreted frizzled-related protein 2 OS=Mus musculus GN=Sfrp2 IPI>P97299>S289>Secreted frizzled-related protein 2 IPI>IPI00387239.1>S289>Sfrp2 Secreted frizzled-related protein 2 NCBI>61216765>S289>Secreted frizzled-related protein 2 precursor (sFRP-2) (Secreted…	R.ISRS*IR.K	S289*	UNI:P97299	1.14724	0.0285086	7.25698e+06	7.25698e+06	7804986	5425249	2428861	13368813	6.32561e+06	6345005	4875607	2271013	11810817	406.213	0.643318	22.28	13.9358	0.43905	2	0		61216765	Secreted frizzled-related protein 2 precursor (sFRP-2) (Secreted apoptosis related protein 1) (SARP-1) (SDF5 protein)	P97299	SFRP2_MOUSE	16041_1	374996	0.108452	F	22.28	extracellular region cytoplasm	multicellular organismal development	protein binding	Wnt signaling pathway Nucleotide excision repair
1959912	DNA polymerase eta	Manual Assigned Name:DNA polymerase eta HPRD>01592_1>S235>Ribosomal protein S6 HPRD>04913_1>S379>DNA polymerase eta SwissPROT>A2BHQ4_MOUSE>S495>Doublecortin domain containing 5 (Fragment) OS=Mus musculus GN=Dcdc5 SwissPROT>D3YX41_MOUSE>S235>Uncharacterized protein OS=Mus musculus GN=Gm16409 SwissPROT>D3Z6N6_MOUSE>S235>MCG22088 OS=Mus musculus GN=Rps6-ps1 SwissPROT>POLH_MOUSE>S378>DNA polymerase e…	R.RLS*SLR.R	S378*	UNI:Q9JJN0	1.14724	0.0285086	7.25698e+06	7.25698e+06	7804986	5425249	2428861	13368813	6.32561e+06	6345005	4875607	2271013	11810817	406.213	0.182397	30.09	10.7918	0.743117	2	0		51338633	40S ribosomal protein S6 (Phosphoprotein NP33)	Q9JJN0	RS6_MOUSE	04913_1	375247	0.182397	F	30.09	nucleus cytoplasm intracellular integral to membrane extracellular region	DNA repair translation intracellular signaling cascade proteolysis	DNA binding protein binding structural constituent of ribosome binding	Lysine degradation Folate biosynthesis Insulin signaling pathway mTOR signaling pathway Non-homologous end-joining Complement and coagulation cascades Ribosome Bacterial secretion system
1960264	DNA polymerase eta	Manual Assigned Name:DNA polymerase eta HPRD>01592_1>S236>Ribosomal protein S6 HPRD>04913_1>S380>DNA polymerase eta SwissPROT>A2BHQ4_MOUSE>S496>Doublecortin domain containing 5 (Fragment) OS=Mus musculus GN=Dcdc5 SwissPROT>D3YX41_MOUSE>S236>Uncharacterized protein OS=Mus musculus GN=Gm16409 SwissPROT>D3Z6N6_MOUSE>S236>MCG22088 OS=Mus musculus GN=Rps6-ps1 SwissPROT>POLH_MOUSE>S379>DNA polymerase e…	R.RLSS*LR.R	S379*	UNI:Q9JJN0	1.14724	0.0285086	7.25698e+06	7.25698e+06	7804986	5425249	2428861	13368813	6.32561e+06	6345005	4875607	2271013	11810817	416.221	0.0938137	31.66	16.9461	0.672063	2	0		51338633	40S ribosomal protein S6 (Phosphoprotein NP33)	Q9JJN0	RS6_MOUSE	04913_1	375247	0.0938137	F	31.66	nucleus cytoplasm intracellular integral to membrane extracellular region	DNA repair translation intracellular signaling cascade proteolysis	DNA binding protein binding structural constituent of ribosome binding	Lysine degradation Folate biosynthesis Insulin signaling pathway mTOR signaling pathway Non-homologous end-joining Complement and coagulation cascades Ribosome Bacterial secretion system
1958650	Ubiquitin carboxyl-terminal hydrolase	Manual Assigned Name:Ubiquitin carboxyl-terminal hydrolase HPRD>11664_1>Ubiquitin specific protease 24 HPRD>11664_2>Ubiquitin specific protease 24 IPI>E9PV45>Ubiquitin carboxyl-terminal hydrolase IPI>B1AY13>Ubiquitin carboxyl-terminal hydrolase 24 IPI>IPI00123410.5>Usp24 Isoform 1 of Ubiquitin carboxyl-terminal hydrolase 24 NCBI>212288549>RecName: Full=Ubiquitin carboxyl-terminal hydrolase 24 NCB…	R.TIS*AQDTLAYATALLNEK.E	S2559*	UNI:E9PV45	1.14614	0.026975	1.52472e+06	1.52472e+06	1462137	2520873	897959	1217907	1.33031e+06	1361787	2095498	822692	1041249	1006	0.928896	22.17	16.9461	0.138818	2	0		212288549	RecName: Full=Ubiquitin carboxyl-terminal hydrolase 24	E9PV45	E9PV45_MOUSE	11664	375250	0.928896	F	22.17	nucleus intracellular	modification-dependent protein catabolic process	hydrolase activity
1958651	Ubiquitin carboxyl-terminal hydrolase	Manual Assigned Name:Ubiquitin carboxyl-terminal hydrolase HPRD>11664_1>Ubiquitin specific protease 24 HPRD>11664_2>Ubiquitin specific protease 24 IPI>E9PV45>Ubiquitin carboxyl-terminal hydrolase IPI>B1AY13>Ubiquitin carboxyl-terminal hydrolase 24 IPI>IPI00123410.5>Usp24 Isoform 1 of Ubiquitin carboxyl-terminal hydrolase 24 NCBI>212288549>RecName: Full=Ubiquitin carboxyl-terminal hydrolase 24 NCB…	R.TISAQDT*LAYATALLNEK.E	T2563*	UNI:E9PV45	1.14614	0.026975	1.52472e+06	1.52472e+06	1462137	2520873	897959	1217907	1.33031e+06	1361787	2095498	822692	1041249	1001.99	0.140791	32.1	6.50909	0.680969	2	0		212288549	RecName: Full=Ubiquitin carboxyl-terminal hydrolase 24	E9PV45	E9PV45_MOUSE	11664	375250	0.140791	F	32.1	nucleus intracellular	modification-dependent protein catabolic process	hydrolase activity
1959256	RNA-binding protein 39	Manual Assigned Name:RNA-binding protein 39 HPRD>09201_2>S136>Splicing factor HCC1 HPRD>09201_3>S136>Splicing factor HCC1 SwissPROT>B7ZD61_MOUSE>S135>RNA binding motif protein 39 (Fragment) OS=Mus musculus GN=Rbm39 SwissPROT>B7ZD63_MOUSE>S114>RNA binding motif protein 39 (Fragment) OS=Mus musculus GN=Rbm39 SwissPROT>Q3U313_MOUSE>S136>Putative uncharacterized protein OS=Mus musculus GN=Rbm39 Swiss…	K.DKS*PVREPIDNLTPEER.D	S136	UNI:Q8VH51	1.14506	0.0406255	3.27004e+07	3.27004e+07	28043556	36570624	21701449	44485816	2.85577e+07	24086776	29782943	16371103	43989960	701.675	0.377078	42.76	75.5921	0.811503	3	0		28201882	RNA-binding region containing protein 2 (Coactivator of activating protein-1 and estrogen receptors) (Coactivator of AP-1 and ERs) (Transcription coactivator CAPER)	Q8VH51	RNPC2_MOUSE	09201_3	374823	0.377078	F	42.76	nucleus	regulation of transcription mRNA processing transcription	protein binding nucleotide binding
1960240	Itsn1 protein	Manual Assigned Name:Itsn1 protein SwissPROT>D3Z6P4_MOUSE>S273>Uncharacterized protein OS=Mus musculus GN=Itsn1 SwissPROT>ITSN1_MOUSE>S334>Isoform 2 of Intersectin-1 OS=Mus musculus GN=Itsn1 SwissPROT>Q6NZJ5_MOUSE>S334>Itsn1 protein OS=Mus musculus GN=Itsn1 IPI>Q6NZJ5>S334>Itsn1 protein IPI>Q9Z0R4>S334>Intersectin-1 IPI>Q9Z0R4-2>S334>Isoform 2 of Intersectin-1 IPI>IPI00129356.1>S334>Itsn1 Isoform…	R.LPEEPS*SEDEQQPEKK.L	S334	UNI:Q6NZJ5	1.1432	0.0313815	5.33129e+06	5.33129e+06	3694556	5807528	6078557	5744533	4.66347e+06	2969869	4997679	5181600	5504743	655.96	0.774214	22.29	6.76694	0.927508	3	0		20138800	Intersectin 1 (EH and SH3 domains protein 1)	Q6NZJ5	Q6NZJ5_MOUSE		373009	0.774214	F	22.29	membrane lamellipodium	small GTPase mediated signal transduction	protein binding
1959453	Prostaglandin E synthase 3	Manual Assigned Name:Prostaglandin E synthase 3 HPRD>06138_1>Unactive progesterone receptor 23KD HPRD>19281_1>hCG2028557 SwissPROT>TEBP_MOUSE>Prostaglandin E synthase 3 OS=Mus musculus GN=Ptges3 IPI>Q9R0Q7>Prostaglandin E synthase 3 IPI>IPI00127989.1>Ptges3;LOC100048119;Gm9769 Prostaglandin E synthase 3 IPI>E9PXA6>Uncharacterized protein NCBI>8928249>Telomerase-binding protein p23 (Hsp90 co-chape…	K.DWEDDS*DEDMSNFDR.F	S113*	UNI:Q9R0Q7	1.14173	0.04195	9.19858e+07	9.19858e+07	24893194	139904273	117635551	85510031	8.05671e+07	19882319	119935712	96524760	85925626	983.321	0.392748	96.88	114.219	0.987302	2	0		8928249	Telomerase-binding protein p23 (Hsp90 co-chaperone) (Progesterone receptor complex p23)	Q9R0Q7	TEBP_MOUSE	6138	377662	0.166867	F	96.88	cytoplasm	lipid biosynthetic process signal transduction cell proliferation	unfolded protein binding protein binding
1960125	Microtubule-associated protein 1A	Manual Assigned Name:Microtubule-associated protein 1A SwissPROT>A2ARP8_MOUSE>S764S765>Microtubule-associated protein 1 A OS=Mus musculus GN=Mtap1a SwissPROT>MAP1A_MOUSE>S750S751>Isoform 2 of Microtubule-associated protein 1A OS=Mus musculus GN=Map1a IPI>Q9QYR6>S526S527>Microtubule-associated protein 1A IPI>A2ARP8>S526S527>Microtubule-associated protein 1 A IPI>Q9QYR6-2>S526S527>Isoform 2 of Micr…	R.ELALS*S*PEDLTQDFEELK.R	S526S527*	UNI:Q9QYR6	1.13589	0.0494631	4.17936e+06	4.17936e+06	3548327	5404462	3585281		3.67938e+06	2907579	4715610	3414939		1116.48	0.0170255	56.25	56.1954	0.955343	2	0		122065442	Microtubule-associated protein 1A (MAP 1A)	Q9QYR6	MAP1A_MOUSE		384635	0.0170255	F	56.25	microtubule cytosol microtubule associated complex	negative regulation of microtubule depolymerization sensory perception of sound	protein binding
1960217	40S ribosomal protein S6	Manual Assigned Name:40S ribosomal protein S6 HPRD>01592_1>S236S240>Ribosomal protein S6 SwissPROT>D3YX41_MOUSE>S236S240>Uncharacterized protein OS=Mus musculus GN=Gm16409 SwissPROT>D3Z6N6_MOUSE>S236S240>MCG22088 OS=Mus musculus GN=Rps6-ps1 SwissPROT>RS6_MOUSE>S236S240>40S ribosomal protein S6 OS=Mus musculus GN=Rps6 IPI>D3Z6N6>S236S240>40S ribosomal protein S6 IPI>P62754>S236S240>40S ribosomal p…	R.LSS*LRAS*TSK.S	S236S240*	UNI:D3Z6N6	1.13573	0.0252585	8.5307e+06	8.5307e+06	5024857	8502982	8499640	12095335	7.51121e+06	4318804	7360317	8058771	10306965	614.279	0.254165	20.8	8.91475	0.291825	2	0		51338633	40S ribosomal protein S6 (Phosphoprotein NP33)	D3Z6N6	RS6_MOUSE	01592_1	375247	0.254165	F	20.8	nucleus cytoplasm intracellular	translation	protein binding structural constituent of ribosome	Insulin signaling pathway mTOR signaling pathway Ribosome
1959711	Heat shock protein HSP 90-alpha	Manual Assigned Name:Heat shock protein HSP 90-alpha SwissPROT>HS90A_MOUSE>S263>Heat shock protein HSP 90-alpha OS=Mus musculus GN=Hsp90aa1 IPI>P07901>S263>Heat shock protein HSP 90-alpha IPI>IPI00330804.4>S263>Hsp90aa1 Heat shock protein HSP 90-alpha NCBI>1170384>S263>Heat shock protein HSP 90-alpha (HSP 86) (Tumor specific transplantation 86 kDa antigen) (TSTA) NCBI>148686719>S263>mCG14932, iso…	K.ESDDKPEIEDVGS*DEEEEEKK.D	S263*	UNI:P07901	1.13558	0.0443826	3.37004e+07	3.37004e+07	21367406	47577204	48073008	17783939	2.96769e+07	18075643	40244395	42339218	18048423	839.34	1.24086	58.9	38.6008	0.813116	3	0		1170384	Heat shock protein HSP 90-alpha (HSP 86) (Tumor specific transplantation 86 kDa antigen) (TSTA)	P07901	HS90A_MOUSE		372250	1.24086	F	58.9	cytoplasm	protein folding	protein binding	Pathways in cancer Plant-pathogen interaction Progesterone-mediated oocyte maturation Prostate cancer Antigen processing and presentation NOD-like receptor signaling pathway
1960301	Ubiquitin carboxyl-terminal hydrolase	Manual Assigned Name:Ubiquitin carboxyl-terminal hydrolase HPRD>11664_2>Ubiquitin specific protease 24 IPI>E9PV45>Ubiquitin carboxyl-terminal hydrolase IPI>B1AY13>Ubiquitin carboxyl-terminal hydrolase 24 IPI>IPI00123410.5>Usp24 Isoform 1 of Ubiquitin carboxyl-terminal hydrolase 24 NCBI>212288549>RecName: Full=Ubiquitin carboxyl-terminal hydrolase 24 NCBI>123858181>ubiquitin specific protease 24 […	R.VSDQNS*PVLPK.K	S2045	UNI:E9PV45	1.13006	0.0472606	4.09496e+06	4.09496e+06	3146265	4632106	4735589	3865874	3.62368e+06	2474956	3813818	4363401	3842539	632.302	0.761319	41.49	51.5287	0.861599	2	0		212288549	RecName: Full=Ubiquitin carboxyl-terminal hydrolase 24	E9PV45	E9PV45_MOUSE	11664		0.761319	F	41.49	nucleus intracellular	modification-dependent protein catabolic process	hydrolase activity
1959553	Proline-rich AKT1 substrate 1	Manual Assigned Name:Proline-rich AKT1 substrate 1 SwissPROT>AKTS1_MOUSE>Proline-rich AKT1 substrate 1 OS=Mus musculus GN=Akt1s1 IPI>Q9D1F4>Proline-rich AKT1 substrate 1 IPI>IPI00133685.1>Akt1s1 Proline-rich AKT1 substrate 1 IPI>IPI00856261.1>Akt1s1 Protein IPI>E9QKI4>Uncharacterized protein IPI>E9QKI5>Uncharacterized protein IPI>F6R8S6>Uncharacterized protein (Fragment) IPI>IPI00857073.1>Akt1s1 …	K.S*LPVSVPVWAFK.E	S184	UNI:Q9D1F4	1.12967	0.026975	2.9976e+07	2.9976e+07	26990025	43186056	19751997		2.65351e+07	23025038	39151070	17429258		709.373	0.541708	35.71	44.4284	0.830983	2	0		81881209	Proline-rich AKT1 substrate 1 (Proline-rich AKT substrate)	Q9D1F4	AKTS1_MOUSE		380756	0.541708	F	35.71	cytoplasm	negative regulation of protein kinase activity	protein binding
1959947	Histone deacetylase	Manual Assigned Name:Histone deacetylase SwissPROT>D3YYI8_MOUSE>S421S423>MCG128529 OS=Mus musculus GN=Gm10093 SwissPROT>HDAC1_MOUSE>S421S423>Histone deacetylase 1 OS=Mus musculus GN=Hdac1 IPI>D3YYI8>S421S423>Histone deacetylase IPI>O09106>S421S423>Histone deacetylase 1 IPI>IPI00114232.1>S421S423>Hdac1 Histone deacetylase 1 IPI>IPI00556893.3>S421S423>Gm10093 Uncharacterized protein IPI>IPI00850738…	R.IACEEEFS*DS*DEEGEGGRK.N	S421S423*	UNI:D3YYI8	1.12632	0.0354093	3.46004e+06	3.46004e+06	1459864	3989679	3810774	4579824	3.07198e+06	1317168	3290233	3225925	4454581	774.614	0.463859	31.46	100	0.50206	3	0		2498444	Histone deacetylase 1 (HD1)	D3YYI8	HDAC1_MOUSE		388438	0.463859	F	31.46	nucleus	regulation of transcription	protein binding	Pathways in cancer Huntington's disease Chronic myeloid leukemia Cell cycle Notch signaling pathway
1959214	Ras GTPase-activating protein-binding protein 1	Manual Assigned Name:Ras GTPase-activating protein-binding protein 1 SwissPROT>G3BP_MOUSE>S231>Ras-GTPase-activating protein binding protein 1 (GAP SH3-domain binding protein 1) (G3BP-1) (DNA helicase VIII) (HDH-VIII) SwissPROT>G3BP1_MOUSE>S231>Ras GTPase-activating protein-binding protein 1 OS=Mus musculus GN=G3bp1 SwissPROT>Q3UR88_MOUSE>S231>Putative uncharacterized protein OS=Mus musculus GN=G…	K.STS*PAPADVAPAQEDLR.T	S231*	UNI:P97855	1.12355	0.0449745	5.1877e+07	5.1877e+07	66905134	52403709	49606628	38592511	4.61726e+07	57816867	45307397	42247338	39318647	902.908	1.32535	66.62		0.904111	2	0		14916571	Ras-GTPase-activating protein binding protein 1 (GAP SH3-domain binding protein 1) (G3BP-1)	P97855	Q3UR88_MOUSE		371392	0.0454341	F	66.62	nucleus intracellular	transport	protein binding histone binding
1958901	Protein SET	Manual Assigned Name:Protein SET SwissPROT>A2BE92_MOUSE>S30>SET translocation (Fragment) OS=Mus musculus GN=Set SwissPROT>A2BE93_MOUSE>S30>SET translocation (Fragment) OS=Mus musculus GN=Set SwissPROT>Q5U445_MOUSE>S30>cDNA sequence BC085271 OS=Mus musculus GN=BC085271 SwissPROT>SET_MOUSE>S30>Isoform 3 of Protein SET OS=Mus musculus GN=Set IPI>Q9EQU5>S30>Protein SET IPI>Q9EQU5-3>S30>Isoform 3 of P…	K.SAS*PGLPK.G	S30	UNI:Q9EQU5	1.12044	0.0354409	2.38252e+06	2.38252e+06	1439299	2295638	2894022	2901130	2.12641e+06	1141715	2127499	2512835	2723594	422.706	0.333963	39.74	59.8254	0.746841	2	0		46396655	SET protein (Phosphatase 2A inhibitor I2PP2A) (I-2PP2A) (Template activating factor I) (TAF-I)	Q9EQU5	SET_MOUSE		386126	0.333963	F	39.74	cytoplasm nucleus	transport nucleosome assembly	protein binding zinc ion binding ATP binding lipid binding
1959874	Proteasome subunit alpha type-3	Manual Assigned Name:Proteasome subunit alpha type-3 HPRD>01463_1>S243>Proteasome subunit, alpha type 3 HPRD>01463_2>S236>Proteasome subunit, alpha type 3 SwissPROT>PSA3_MOUSE>S243>Proteasome subunit alpha type-3 OS=Mus musculus GN=Psma3 IPI>O70435>S243>Proteasome subunit alpha type-3 IPI>IPI00331644.5>S243>Psma3 Proteasome subunit alpha type-3 IPI>IPI00475256.2>S243>Gm13835 similar to proteasome…	K.ES*LKEEDESDDDNM.-	S243	UNI:O70435	1.11853	0.0387358	2.94662e+06	2.94662e+06	2209962	2856479	3719834	3000216	2.63436e+06	2026974	2617603	3025308	2867564	587.204	0.0858151	23.11		0.640716	3	0		3914438	Proteasome subunit alpha type 3 (Proteasome component C8) (Macropain subunit C8) (Multicatalytic endopeptidase complex subunit C8) (Proteasome subunit K)	O70435	PSA3_MOUSE	01463_2	385508	0.0858151	F	23.11	nucleus	ubiquitin-dependent protein catabolic process	protein binding hydrolase activity	Proteasome
1960189	Proteasome subunit alpha type-3	Manual Assigned Name:Proteasome subunit alpha type-3 HPRD>01463_1>S250>Proteasome subunit, alpha type 3 HPRD>01463_2>S243>Proteasome subunit, alpha type 3 SwissPROT>PSA3_MOUSE>S250>Proteasome subunit alpha type-3 OS=Mus musculus GN=Psma3 IPI>O70435>S250>Proteasome subunit alpha type-3 IPI>IPI00331644.5>S250>Psma3 Proteasome subunit alpha type-3 IPI>IPI00475256.2>S250>Gm13835 similar to proteasome…	K.ESLKEEDES*DDDNM.-	S250	UNI:O70435	1.11853	0.0387358	2.94662e+06	2.94662e+06	2209962	2856479	3719834	3000216	2.63436e+06	2026974	2617603	3025308	2867564	587.205	0.749603	25.22	5.91507	0.913769	3	0		3914438	Proteasome subunit alpha type 3 (Proteasome component C8) (Macropain subunit C8) (Multicatalytic endopeptidase complex subunit C8) (Proteasome subunit K)	O70435	PSA3_MOUSE	01463_2	385508	0.749603	F	25.22	nucleus	ubiquitin-dependent protein catabolic process	protein binding hydrolase activity	Proteasome
1959815	Apoptotic chromatin condensation inducer 1 (Fragment)	Manual Assigned Name:Apoptotic chromatin condensation inducer 1 (Fragment) SwissPROT>ACINU_MOUSE>S349>Isoform 4 of Apoptotic chromatin condensation inducer in the nucleus OS=Mus musculus GN=Acin1 SwissPROT>B8JJ87_MOUSE>S389>Apoptotic chromatin condensation inducer 1 OS=Mus musculus GN=Acin1 SwissPROT>B8JJ88_MOUSE>S334>Apoptotic chromatin condensation inducer 1 (Fragment) OS=Mus musculus GN=Acin1 …	K.SQS*PSPPPLPEDLEK.A	S243	UNI:B8JJ89	1.11596	0.0416618	1.16981e+07	1.16981e+07	10623599	16561007	15731124	3876555	1.04825e+07	8510961	16455179	13538415	3425542	850.892	0.912524	41.62	16.9024	0.801372	2	0		9622185	acinusL protein [Mus musculus]	B8JJ89	B8JJ89_MOUSE		372668	0.163455	F	41.62	nucleus	apoptosis erythrocyte differentiation	nucleotide binding
1960398	Novel protein (1200015F23Rik) (Fragment)	Manual Assigned Name:Novel protein (1200015F23Rik) (Fragment) SwissPROT>A3KGH5_MOUSE>S44>Novel protein (1200015F23Rik) (Fragment) OS=Mus musculus GN=Fam82a2 SwissPROT>A3KGH6_MOUSE>S44>Novel protein (1200015F23Rik) (Fragment) OS=Mus musculus GN=Fam82a2 SwissPROT>A3KGH7_MOUSE>S44>Novel protein (1200015F23Rik) (Fragment) OS=Mus musculus GN=Fam82a2 SwissPROT>RMD3_MOUSE>S44>Regulator of microtubule dy…	R.S*HSLPNSLDYAQASER.G	S44	UNI:A3KGH5	1.11058	0.0434125	4.68859e+07	4.68859e+07	16688841	47727344	39822740	83304510	4.22174e+07	15372883	45826214	31638978	76031695	618.939	0.21997	34.94	10.6695	0.91594	3	0		147643261	Protein FAM82C	A3KGH5	RMD3_MOUSE		379058	0.21997	F	34.94	integral to membrane Golgi apparatus	apoptosis protein folding	protein binding
1958930	Torsin-1A-interacting protein 1	Manual Assigned Name:Torsin-1A-interacting protein 1 SwissPROT>Q1EQW1_MOUSE>S140>Lamina-associated polypeptide 1B OS=Mus musculus GN=Tor1aip1 SwissPROT>Q3UE61_MOUSE>S140>Putative uncharacterized protein OS=Mus musculus GN=Tor1aip1 SwissPROT>TOIP1_MOUSE>S140>Torsin-1A-interacting protein 1 OS=Mus musculus GN=Tor1aip1 IPI>Q921T2>S140>Torsin-1A-interacting protein 1 IPI>IPI00122215.1>S140>Tor1aip1 T…	R.LEQHSQQPQLS*PATSGR.G	S140	UNI:Q921T2	1.10993	0.0449507	1.81342e+06	1.81342e+06	1109822	2202215	1312869	2628770	1.63381e+06	936265	1794304	1126628	2678053	648.637	0.66413	38.43	29.1353	0.926992	3	0		342187057	RecName: Full=Torsin-1A-interacting protein 1; AltName: Full=Lamina-associated polypeptide 1B	Q921T2	TOIP1_MOUSE		374288	0.381708	F	38.43	integral to membrane nuclear envelope	regulation of gene expression negative regulation of transcription from RNA polymerase II promoter lipid metabolic process	protein binding
1959646	Retrotransposon-derived protein PEG10	Manual Assigned Name:Retrotransposon-derived protein PEG10 SwissPROT>PEG10_MOUSE>S30>Isoform RF1 of Retrotransposon-derived protein PEG10 OS=Mus musculus GN=Peg10 IPI>Q7TN75>S30>Retrotransposon-derived protein PEG10 IPI>Q7TN75-2>S30>Isoform RF1 of Retrotransposon-derived protein PEG10 IPI>IPI00759852.1>S30>Peg10 Isoform RF1 of Retrotransposon-derived protein PEG10 IPI>IPI00461381.4>S30>Peg10 Isof…	K.S*PGVPDAEDDDER.R	S30	UNI:Q7TN75	1.10603	0.0345487	8.1689e+06	8.1689e+06	6557975	9758296	12481470	3877853	7.38578e+06	5992226	9272385	11132374	3146126	741.276	1.2271	49.24	100	0.915074	2	0		172045711	Retrotransposon-derived protein PEG10 (Paternally expressed gene 10 protein) (Retrotransposon-derived gag-like polyprotein) (Embryonal carcinoma differentiation regulated protein) (Mammalian retrotransposon-derived protein 2) (Myelin expression factor 3-like protein 1) (MEF3-like protein 1) (Retrotransposon gag domain-containing protein 3) (Ty3/Gypsy-like protein) (Myelin expression factor 3) (My…	Q7TN75	PEG10_MOUSE		383052	0.48463	F	49.24	nucleus	proteolysis	zinc ion binding
1959171	A-kinase anchor protein 1, mitochondrial	Manual Assigned Name:A-kinase anchor protein 1, mitochondrial SwissPROT>AKAP1_MOUSE>S101>"Isoform 6 of A-kinase anchor protein 1, mitochondrial OS=Mus musculus GN=Akap1" SwissPROT>B1AR25_MOUSE>S101>A kinase (PRKA) anchor protein 1 OS=Mus musculus GN=Akap1 IPI>O08715>S101>A-kinase anchor protein 1, mitochondrial IPI>O08715-2>S101>Isoform 1 of A-kinase anchor protein 1, mitochondrial IPI>O08715-3>S…	R.S*ESSGNLPSVADTR.S	S101	UNI:O08715	1.10275	0.0440881	1.12409e+07	1.12409e+07	7778580	13955003	13382764	9847185	1.01935e+07	6706092	14162970	11296832	8608216	755.326	0.524627	67.44	16.4427	0.949755	2	0		14194433	A kinase anchor protein 1, mitochondrial precursor (Protein kinase A anchoring protein 1) (PRKA1) (Dual specificity A-Kinase anchoring protein 1) (D-AKAP-1) (Spermatid A-kinase anchor protein) (S-AKAP)	O08715	B1AR25_MOUSE		371358	0.279536	F	67.44	integral to membrane cytoplasm	signal transduction regulation of transcription	protein binding
1959120	Superkiller viralicidic activity 2-like (S. cerevisiae)	Manual Assigned Name:Superkiller viralicidic activity 2-like (S. cerevisiae) SwissPROT>Q3TW36_MOUSE>S240>Putative uncharacterized protein OS=Mus musculus GN=Skiv2l IPI>Q6NZR5>S240>Superkiller viralicidic activity 2-like (S. cerevisiae) IPI>IPI00454140.5>S240>Skiv2l superkiller viralicidic activity 2-like NCBI>148694805>S232>mCG15924, isoform CRA_a [Mus musculus] [MASS=136654] NCBI>42406362>S240>S…	R.GDNAS*PSPSGTPLVR.A	S240	UNI:Q6NZR5	1.10123	0.0346121	4.17923e+06	4.17923e+06	3611453	5702587	5191454	2211416	3.79506e+06	3375934	5490307	4414332	1899652	767.849	0.0117288	49.45	26.0224	0.754834	2	0		148694805	mCG15924, isoform CRA_a [Mus musculus] [MASS=136654]	Q6NZR5	Q3TW36_MOUSE		377408	0.0117288	F	49.45	nucleus	negative regulation of transcription	ATP binding	RNA degradation
1959041	Pyruvate dehydrogenase E1 component subunit alpha, somatic form, mitochondrial	Manual Assigned Name:Pyruvate dehydrogenase E1 component subunit alpha, somatic form, mitochondrial HPRD>02420_1>S232>Pyruvate dehydrogenase complex, E1-alpha polypeptide 1 SwissPROT>ODPA_MOUSE>S232>"Pyruvate dehydrogenase E1 component subunit alpha, somatic form, mitochondrial OS=Mus musculus GN=Pdha1" IPI>P35486>S232>Pyruvate dehydrogenase E1 component subunit alpha, somatic form, mitochondrial…	R.YGMGTS*VER.A	S232*	UNI:P35486	1.09967	0.0397405	1.23253e+08	1.23253e+08	103657983	129482827	146026719	113843817	1.12081e+08	100025607	119990733	122091175	106217264	540.215	0.609585	60.72	30.193	0.929255	2	0		548409	Pyruvate dehydrogenase E1 component alpha subunit, somatic form, mitochondrial precursor (PDHE1-A type I)	P35486	ODPA_MOUSE	02420_1	376517	0.0667023	F	60.72	mitochondrion intracellular membrane-bounded organelle	oxidation reduction	oxidoreductase activity oxidoreductase activity, acting on the aldehyde or oxo group of donors, disulfide as acceptor	Glycolysis / Gluconeogenesis Butanoate metabolism Pyruvate metabolism Citrate cycle (TCA cycle) Valine, leucine and isoleucine biosynthesis
1958905	Uncharacterized protein	Manual Assigned Name:Uncharacterized protein SwissPROT>CF203_MOUSE>S106>Uncharacterized protein C6orf203 homolog OS=Mus musculus IPI>D3Z316>S106>Uncharacterized protein IPI>Q9CQF4>S106>Uncharacterized protein C6orf203 homolog IPI>IPI00132478.1>S106>1700021F05Rik Uncharacterized protein C6orf203 homolog NCBI>71152389>S106>Uncharacterized protein C6orf203 homolog NCBI>74194483>S106>unnamed protein …	K.EADEEDS*DEETSYPER.S	S106	UNI:D3Z316	1.09692	0.0230352	4.18646e+06	4.18646e+06	1552652	4933518	6182387	4077265	3.81656e+06	1368923	4591652	5711814	3593839	990.846	0.980469	49.35	61.3744	0.976434	2	0		71152389	Uncharacterized protein C6orf203 homolog	D3Z316	CF203_MOUSE		371575	0.798714	F	49.35	mitochondrion	cell communication	protein binding
1960295	Pyruvate dehydrogenase E1 component subunit alpha, somatic form, mitochondrial	Manual Assigned Name:Pyruvate dehydrogenase E1 component subunit alpha, somatic form, mitochondrial HPRD>01531_1>S291>Pyruvate dehydrogenase E1 alpha subunit, testis specific form HPRD>02420_1>S293>Pyruvate dehydrogenase complex, E1-alpha polypeptide 1 SwissPROT>ODPA_MOUSE>S293>"Pyruvate dehydrogenase E1 component subunit alpha, somatic form, mitochondrial OS=Mus musculus GN=Pdha1" IPI>P35486>S29…	R.YHGHS*MSDPGVSYR.T	S293*	UNI:P35486	1.09651	0.040363	1.95299e+06	1.95299e+06	2321234	1915516	2139696	1435518	1.78109e+06	2010015	1693778	2000435	1420143	841.835	1.3443	40.57	19.8227	0.901224	2	0		548409	Pyruvate dehydrogenase E1 component alpha subunit, somatic form, mitochondrial precursor (PDHE1-A type I)	P35486	ODPA_MOUSE	02420_1	376517	1.3443	F	40.57	mitochondrion intracellular membrane-bounded organelle	oxidation reduction	oxidoreductase activity oxidoreductase activity, acting on the aldehyde or oxo group of donors, disulfide as acceptor	Glycolysis / Gluconeogenesis Butanoate metabolism Pyruvate metabolism Citrate cycle (TCA cycle) Valine, leucine and isoleucine biosynthesis
1960030	Protein phosphatase 1 regulatory subunit 12A	Manual Assigned Name:Protein phosphatase 1 regulatory subunit 12A SwissPROT>MYPT1_MOUSE>S445>Isoform 2 of Protein phosphatase 1 regulatory subunit 12A OS=Mus musculus GN=Ppp1r12a IPI>Q9DBR7>S445>Protein phosphatase 1 regulatory subunit 12A IPI>Q9DBR7-2>S445>Isoform 2 of Protein phosphatase 1 regulatory subunit 12A IPI>IPI00671847.3>S445>Ppp1r12a Isoform 1 of Protein phosphatase 1 regulatory subun…	R.KTGS*YGALAEISASK.E	S445*	UNI:Q9DBR7	1.08783	0.0386766	9.02385e+06	9.02385e+06	6696010	7641935	4248130	17509339	8.29525e+06	6191958	6544022	4140532	16304507	781.877	0.235483	93.11	16.9461	0.868631	2	0		281185473	RecName: Full=Protein phosphatase 1 regulatory subunit 12A; AltName: Full=Myosin phosphatase-targeting subunit 1; Short=Myosin phosphatase target subunit 1	Q9DBR7	MYPT1_MOUSE		385473	0.235483	F	93.11	cytoplasm intracellular membrane-bounded organelle	protein amino acid dephosphorylation	protein binding	Regulation of actin cytoskeleton Vascular smooth muscle contraction Focal adhesion Long-term potentiation
1958731	Heterogeneous nuclear ribonucleoproteins C1/C2	Manual Assigned Name:Heterogeneous nuclear ribonucleoproteins C1/C2 SwissPROT>HNRPC_MOUSE>S299>Isoform 5 of Heterogeneous nuclear ribonucleoproteins C1/C2 OS=Mus musculus GN=Hnrnpc IPI>Q9Z204>S306>Heterogeneous nuclear ribonucleoproteins C1/C2 IPI>Q9Z204-3>S306>Isoform 3 of Heterogeneous nuclear ribonucleoproteins C1/C2 IPI>Q9Z204-4>S306>Isoform 4 of Heterogeneous nuclear ribonucleoproteins C1/C2…	K.DDEKEPEEGEDDRDS*ANGEDDS.-	S306	UNI:Q9Z204	1.08774	0.0497237	2.70052e+07	2.70052e+07	11019207	31923150	35647436	29430956	2.48269e+07	9759551	28137383	31258198	30152457	850.966	1.46263	28.15	81.5308	0.935614	3	0		20455216	Heterogeneous nuclear ribonucleoproteins C1/C2 (hnRNP C1 / hnRNP C2)	Q9Z204	HNRPC_MOUSE		387360	1.39207	F	28.15	nucleus ribonucleoprotein complex	mRNA processing female pregnancy	protein binding nucleotide binding	Spliceosome
1958601	Microfibrillar-associated protein 1	Manual Assigned Name:Microfibrillar-associated protein 1 HPRD>02569_1>S52S53>Microfibrillar associated protein 1 SwissPROT>MFAP1_MOUSE>S52S53>Microfibrillar-associated protein 1 OS=Mus musculus GN=Mfap1 IPI>Q9CQU1>S52S53>Microfibrillar-associated protein 1 IPI>IPI00228590.2>S52S53>Mfap1b;Mfap1a Microfibrillar-associated protein 1 NCBI>59798469>S52S53>Microfibrillar-associated protein 1 NCBI>12323…	K.RPDYAPMES*S*DEEDEEFQFIK.K	S52S53*	UNI:Q9CQU1	1.08761	0.0474499	3.69941e+06	3.69941e+06	1345727	4458651	6752687	2240591	3.4014e+06	1072039	4394396	6083246	2055938	908.016	0.675231	38.45	16.9229	0.949576	3	0		59798469	Microfibrillar-associated protein 1	Q9CQU1	MFAP1_MOUSE	02569_1	380687	0.675231	F	38.45	extracellular region	biological_process protein amino acid phosphorylation	molecular_function protein binding
1959222	Translation initiation factor eIF-2B subunit epsilon	Manual Assigned Name:Translation initiation factor eIF-2B subunit epsilon SwissPROT>EI2BE_MOUSE>S540>Translation initiation factor eIF-2B subunit epsilon OS=Mus musculus GN=Eif2b5 IPI>Q8CHW4>S540>Translation initiation factor eIF-2B subunit epsilon IPI>IPI00261239.6>S540>Eif2b5 Translation initiation factor eIF-2B subunit epsilon NCBI>81878145>S540>Translation initiation factor eIF-2B subunit eps…	R.AGS*PQLDDIR.V	S540	UNI:Q8CHW4	1.08019	0.0461343	3.13873e+07	3.13873e+07	37646235	35034500	29240471	23628012	2.90571e+07	33256480	32698338	26478249	23795422	581.263	1.36718	55.1	100	0.896187	2	0		81878145	Translation initiation factor eIF-2B subunit epsilon (eIF-2B GDP-GTP exchange factor subunit epsilon)	Q8CHW4	EI2BE_MOUSE		393041	0.00172189	F	55.1	nucleus	translation	protein binding
1958826	La-related protein 7	Manual Assigned Name:La-related protein 7 IPI>Q05CL8>S253S256>La-related protein 7 IPI>IPI00340860.5>S253S256>Larp7 Isoform 1 of La-related protein 7 NCBI>134034152>S253S256>La-related protein 7 (La ribonucleoprotein domain family member 7) NCBI>116283672>S253S256>Larp7 protein [Mus musculus] [MASS=41706] NCBI>148680319>S147S150>La ribonucleoprotein domain family, member 7, isoform CRA_b [Mus mus…	R.TAS*EGS*EAETPEAPK.Q	S253S256	UNI:Q05CL8	1.0719	0.0297234	447269	447269	265768	602239	699753	221318	417267	237550	547990	683567	199962	832.31	0.644381	51.05	24.2	0.883608	2	0		134034152	La-related protein 7 (La ribonucleoprotein domain family member 7)	Q05CL8	LARP7_MOUSE		374985	0.644381	F	51.05	nucleus	RNA processing	nucleotide binding
1959681	STIP1 homology and U box-containing protein 1	Manual Assigned Name:STIP1 homology and U box-containing protein 1 SwissPROT>CHIP_MOUSE>S20>STIP1 homology and U box-containing protein 1 OS=Mus musculus GN=Stub1 SwissPROT>STUB1_MOUSE>S20>STIP1 homology and U box-containing protein 1 (EC 6.3.2.-) (STIP1 homology and U-box containing protein 1) (Carboxy terminus of Hsp70-interacting protein) (E3 ubiquitin protein ligase CHIP) IPI>Q9WUD1>S20>STIP1…	R.LGTGGGGS*PDKSPSAQELK.E	S20*	UNI:Q9WUD1	1.06219	0.0346121	6.57127e+06	6.57127e+06	5216784	7583003	7049821	6435490	6.18654e+06	5134786	7151614	6385278	6074487	627.969	0.218397	26.03	13.8081	0.370343	3	0		78099174	STIP1 homology and U box-containing protein 1 (STIP1 homology and U-box-containing protein 1) (Carboxy terminus of Hsp70-interacting protein) (E3 ubiquitin-protein ligase CHIP)	Q9WUD1	STUB1_MOUSE		378465	0.218397	F	26.03	cytoplasm	modification-dependent protein catabolic process	protein binding	Ubiquitin mediated proteolysis
1959270	Calcium-regulated heat stable protein 1	Manual Assigned Name:Calcium-regulated heat stable protein 1 HPRD>08515_1>S41>Calcium regulated heat stable protein 1 HPRD>08515_2>S41>Calcium regulated heat stable protein 1 SwissPROT>CHSP1_MOUSE>S42>Calcium-regulated heat stable protein 1 OS=Mus musculus GN=Carhsp1 IPI>Q9CR86>S42>Calcium-regulated heat stable protein 1 IPI>IPI00133349.1>S42>Carhsp1 Calcium-regulated heat stable protein 1 NCBI>4…	R.GNVVPS*PLPTR.R	S42*	UNI:Q9CR86	1.06194	0.0443826	2.06092e+08	2.06092e+08	185733491	277085120	233009787	128537993	1.9407e+08	174936124	265852391	225378079	110114171	613.812	0.723942	34.98	42.3872	0.674233	2	0		41016923	Calcium-regulated heat stable protein 1 (Calcium-regulated heat-stable protein of 24 kDa) (CRHSP-24)	Q9CR86	CHSP1_MOUSE	08515_2	370652	0.12881	F	34.98	cytoplasm	regulation of transcription, DNA-dependent	protein binding
1959265	Protein kinase, cAMP dependent regulatory, type I, alpha	Manual Assigned Name:Protein kinase, cAMP dependent regulatory, type I, alpha HPRD>01786_1>S83>Protein kinase, cAMP dependent, regulatory, type I, alpha HPRD>01786_2>S83>Protein kinase, cAMP dependent, regulatory, type I, alpha HPRD>01786_3>S83>Protein kinase, cAMP dependent, regulatory, type I, alpha SwissPROT>A2AI69_MOUSE>S83>"Protein kinase, cAMP dependent regulatory, type I, alpha OS=Mus musc…	R.EDEIS*PPPPNPVVK.G	S83*	UNI:A2AI69	1.05345	0.0449349	7.23779e+07	7.23779e+07	92399812	78798297	83232701	35080964	6.87058e+07	86023501	77445667	76718145	34636036	799.379	0.29917	73.35	100	0.935025	2	0		54036156	cAMP-dependent protein kinase type I-alpha regulatory subunit	A2AI69	Q8C3Z4_MOUSE	01786_3	371954	0.067595	F	73.35	cytoplasm cytosol integral to membrane cAMP-dependent protein kinase complex	signal transduction protein amino acid phosphorylation	protein binding kinase activity cAMP-dependent protein kinase regulator activity	Insulin signaling pathway Apoptosis
1959067	Programmed cell death protein 5	Manual Assigned Name:Programmed cell death protein 5 SwissPROT>D3YVV5_MOUSE>S121>Uncharacterized protein OS=Mus musculus GN=Pdcd5 SwissPROT>D3Z7Q5_MOUSE>S198>Uncharacterized protein OS=Mus musculus GN=Pdcd5 SwissPROT>PDCD5_MOUSE>S118>Programmed cell death protein 5 (TFAR19 protein) (TF-1 cell apoptosis related gene 19 protein) IPI>P56812>S119>Programmed cell death protein 5 IPI>D3Z7Q5>S119>Unchar…	R.KVMDS*DEDDADY.-	S119	UNI:P56812	1.02346	0.0492366	6.26559e+06	6.26559e+06	3084175	8315392	5549873	8112904	6.12194e+06	2957631	8342588	5269767	7917761	741.753	0.0323778	37.07	101.763	0.371847	2	0		6686019	Programmed cell death protein 5 (TFAR19 protein) (TF-1 cell apoptosis related gene-19 protein)	P56812	PDCD5_MOUSE		376141	0.0323778	F	37.07	nucleus	apoptosis	DNA binding
